# Supplementary material for: Probing metazoan polyphosphate biology using Drosophila reveals novel and conserved polyP functions
Source: bioRxiv preprint, doi:10.1101/2023.03.26.534266, version 3 (2025-11-27)
Supplement: Supplementary RNA seq datafile [file 534266_file05.xlsx]

## Sheet: Log2.Filtered.Normalized.Genes.
	geneID	A2	A5	P3	P4	control.AVG	tub_ppx.AVG	logFC.tub_ppx_WT
1	128up	5.20274	5.27836	5.3991	5.46133	5.24055	5.43021	0.189661
2	14-3-3epsilon	9.80266	9.86255	9.90086	9.9793	9.83261	9.94008	0.107473
3	14-3-3zeta	9.75901	9.84253	9.83933	9.71662	9.80077	9.77798	-0.0227923
4	140up	2.87166	2.94363	3.10019	2.74717	2.90765	2.92368	0.0160323
5	18SrRNA-Psi:CR41602	9.3085	8.89746	8.93826	10.5169	9.10298	9.72758	0.624596
6	18SrRNA-Psi:CR45861	8.14834	7.86881	7.69826	8.92906	8.00857	8.31366	0.305086
7	18w	6.07522	6.21585	5.95884	5.94086	6.14553	5.94985	-0.19568
8	26-29-p	7.8365	8.09703	8.25905	8.47263	7.96677	8.36584	0.399075
9	28SrRNA-Psi:CR40596	5.81863	6.24227	6.17761	7.43693	6.03045	6.80727	0.776819
10	28SrRNA-Psi:CR45851	9.86879	9.68716	9.67315	10.8837	9.77798	10.2784	0.500449
11	28SrRNA-Psi:CR45855	4.82785	5.16347	5.25003	6.18736	4.99566	5.71869	0.723037
12	28SrRNA-Psi:CR45859	8.21107	8.35302	8.13018	9.9189	8.28204	9.02454	0.742496
13	28SrRNA-Psi:CR45862	6.34466	6.66741	6.24561	8.04141	6.50603	7.14351	0.637478
14	2mit	4.45577	4.4555	3.67753	3.48945	4.45563	3.58349	-0.872142
15	4E-T	6.78802	6.8871	6.74176	6.33769	6.83756	6.53973	-0.297836
16	5-HT1A	1.80145	2.13834	1.54926	1.3663	1.9699	1.45778	-0.512115
17	5-HT1B	0.946501	0.92752	0.186472	0.438226	0.93701	0.312349	-0.624661
18	5-HT2A	1.62713	1.70447	1.34064	1.41708	1.6658	1.37886	-0.286941
19	5-HT7	3.10678	3.29185	2.65058	2.464	3.19932	2.55729	-0.642024
20	5.8SrRNA-Psi:CR45854	7.83527	7.76853	8.37351	8.73869	7.8019	8.5561	0.7542
21	5.8SrRNA-Psi:CR45863	0.739557	1.01168	0.919609	-0.132085	0.875618	0.393762	-0.481855
22	5PtaseI	3.68038	3.78519	3.70219	3.4258	3.73279	3.56399	-0.168791
23	7B2	5.04902	4.66833	4.85937	4.69027	4.85868	4.77482	-0.0838548
24	a	5.49836	4.99038	5.12771	5.19554	5.24437	5.16162	-0.0827455
25	a6	3.7903	3.6912	3.86052	4.02501	3.74075	3.94277	0.202016
26	AANATL2	5.41477	5.4908	6.19652	6.87121	5.45278	6.53386	1.08108
27	AANATL4	1.13625	2.23836	2.6188	2.15728	1.68731	2.38804	0.700734
28	AANATL6	2.63048	3.93141	4.79554	3.3841	3.28095	4.08982	0.808876
29	AANATL7	0.326049	0.413581	-0.0783457	-0.163355	0.369815	-0.12085	-0.490665
30	Aasdh	3.43117	3.52274	3.34444	3.11314	3.47696	3.22879	-0.248168
31	Aatf	3.82331	3.96858	4.22519	4.13681	3.89594	4.181	0.28506
32	aay	5.35276	5.61848	5.48409	5.20164	5.48562	5.34286	-0.142757
33	ab	5.72243	5.64113	5.35842	5.59283	5.68178	5.47563	-0.206152
34	Abca3	5.5256	6.17971	5.95795	6.02305	5.85266	5.9905	0.137845
35	ABCB7	5.05348	5.12533	5.08912	5.41613	5.0894	5.25263	0.163225
36	Abcd1	7.25229	7.34293	7.26272	6.59648	7.29761	6.9296	-0.368015
37	Abcd3	5.72895	6.02577	6.048	6.13695	5.87736	6.09247	0.215118
38	abd-A	6.61938	6.35172	6.267	6.11201	6.48555	6.1895	-0.296041
39	Abd-B	5.15507	5.05987	5.07173	4.76224	5.10747	4.91698	-0.190488
40	Abi	5.82193	5.94915	5.84434	5.91916	5.88554	5.88175	-0.00379094
41	Abl	6.91525	7.06358	7.46222	6.99427	6.98942	7.22824	0.238825
42	abo	3.29443	3.50803	3.51855	3.58935	3.40123	3.55395	0.152725
43	Abp1	6.07384	6.12326	6.14538	6.19869	6.09855	6.17203	0.0734838
44	abs	4.83523	5.01926	4.91139	4.89013	4.92725	4.90076	-0.0264894
45	ac	2.00023	1.53962	1.97258	1.36668	1.76993	1.66963	-0.100297
46	Ac13E	5.51806	5.95428	5.67131	5.74738	5.73617	5.70935	-0.0268226
47	Ac3	3.72446	3.55336	3.19794	2.95631	3.63891	3.07713	-0.561781
48	Ac76E	4.20337	4.7387	4.32958	4.35869	4.47103	4.34413	-0.126901
49	Ac78C	4.11003	4.21641	3.91022	3.97627	4.16322	3.94324	-0.219974
50	Acam	4.14375	3.78544	3.30548	3.05088	3.9646	3.17818	-0.786419
51	Acat1	5.48549	5.45165	5.80625	5.96346	5.46857	5.88485	0.416279
52	Acat2	4.73341	4.5029	4.79077	4.85448	4.61816	4.82263	0.20447
53	Acbp1	5.86885	5.54223	5.92534	5.5353	5.70554	5.73032	0.0247798
54	Acbp2	3.65158	4.30786	4.9597	4.12268	3.97972	4.54119	0.561471
55	Acbp3	3.09287	4.5798	4.42059	4.26237	3.83633	4.34148	0.505151
56	Acbp4	-1.1219	0.91633	1.26718	0.833105	-0.102784	1.05014	1.15292
57	Acbp5	0.647377	2.8996	3.33289	2.39358	1.77349	2.86324	1.08975
58	Acbp6	3.56267	5.36886	4.25824	4.60825	4.46576	4.43325	-0.0325147
59	ACC	5.74712	6.11482	6.18246	6.0956	5.93097	6.13903	0.208056
60	AcCoAS	6.05896	6.44895	7.11602	7.02823	6.25395	7.07212	0.818172
61	Ace	5.52268	5.64491	5.3272	5.41884	5.5838	5.37302	-0.210779
62	Acer	5.46473	5.39226	5.23798	5.13674	5.4285	5.18736	-0.241138
63	Acf	5.78994	5.83932	5.69073	5.70967	5.81463	5.7002	-0.114431
64	achi	3.94634	4.05291	4.23304	4.48208	3.99963	4.35756	0.357935
65	Achl	7.55553	7.3539	7.0954	7.75258	7.45471	7.42399	-0.0307195
66	acj6	2.19979	2.23812	2.02482	2.38391	2.21896	2.20437	-0.0145894
67	Ack	5.81339	5.61851	5.76013	5.84093	5.71595	5.80053	0.0845831
68	Ack-like	6.72463	6.79038	6.51906	6.56715	6.7575	6.54311	-0.214399
69	Acn	6.83182	6.98276	6.72976	7.04397	6.90729	6.88686	-0.0204264
70	ACOX1	5.802	5.79041	5.98869	5.97721	5.79621	5.98295	0.186743
71	Acox3	6.46424	6.84257	6.86222	6.88399	6.65341	6.8731	0.219699
72	Acox57D-d	2.33411	2.59998	3.07096	2.30944	2.46704	2.6902	0.223156
73	Acox57D-p	4.57657	4.88144	4.83739	4.60598	4.729	4.72169	-0.00731793
74	Acp36DE	0.679397	0.739752	1.37297	0.467827	0.709574	0.920399	0.210824
75	Acph-1	5.74765	5.77916	5.72241	5.62638	5.7634	5.67439	-0.0890122
76	Acsf2	0.632548	1.86877	1.97001	1.84373	1.25066	1.90687	0.65621
77	Acsf3	3.28865	3.07175	3.11753	2.91493	3.1802	3.01623	-0.163965
78	Acsl	6.44234	6.62612	6.5243	6.23515	6.53423	6.37973	-0.154504
79	Acsx4	3.77168	4.03644	4.05857	3.89971	3.90406	3.97914	0.0750878
80	Act42A	9.94724	9.88579	9.80246	9.84491	9.91652	9.82369	-0.0928309
81	Act57B	10.2449	11.173	11.1346	11.2521	10.7089	11.1933	0.484367
82	Act5C	12.2606	12.1086	12.1503	12.3909	12.1846	12.2706	0.0860243
83	Act79B	-0.511576	0.268149	0.03438	0.611157	-0.121714	0.322768	0.444482
84	Act87E	7.59628	8.1819	8.3316	8.2219	7.88909	8.27675	0.387656
85	Actbeta	3.62449	3.38699	2.95918	2.06245	3.50574	2.51081	-0.994926
86	Actn	7.37004	7.88267	7.89933	8.22951	7.62635	8.06442	0.438066
87	Actn3	3.83721	3.43614	3.34663	2.76593	3.63668	3.05628	-0.580399
88	ACXA	3.93767	3.77881	3.57687	3.25034	3.85824	3.41361	-0.444637
89	ACXB	2.24976	2.00938	1.80826	1.16289	2.12957	1.48558	-0.643992
90	ACXC	4.86169	4.48468	4.45243	4.1298	4.67318	4.29111	-0.382071
91	ACXD	3.56097	3.94263	3.88513	4.30689	3.7518	4.09601	0.344216
92	ACXE	1.36226	1.36781	1.94085	1.85101	1.36503	1.89593	0.530895
93	Acyp	1.55241	1.34182	0.751696	0.514188	1.44712	0.632942	-0.814175
94	Acyp2	3.82834	3.81315	4.16479	3.57608	3.82075	3.87044	0.0496902
95	Ada	2.03602	1.77438	1.87654	2.03752	1.9052	1.95703	0.0518343
96	Ada1-1	1.31731	1.1708	0.929371	1.51961	1.24405	1.22449	-0.0195639
97	Ada1-2	3.59468	3.44406	3.61816	3.57235	3.51937	3.59526	0.0758888
98	Ada2a	3.55095	3.55192	3.96153	4.03256	3.55143	3.99705	0.445611
99	Ada2b	5.20461	5.33858	5.2817	5.39837	5.27159	5.34004	0.0684433
100	Ada3	4.83422	4.91152	4.72601	4.96432	4.87287	4.84516	-0.0277091
101	AdamTS-A	6.67297	6.3665	6.35957	6.31238	6.51973	6.33597	-0.183759
102	AdamTS-B	5.2782	5.50269	5.31925	5.65287	5.39044	5.48606	0.0956176
103	Adar	6.2329	6.32341	5.87752	5.61079	6.27816	5.74415	-0.534005
104	Adat1	3.01135	2.79907	2.72941	2.58427	2.90521	2.65684	-0.24837
105	Adck1	2.83318	2.61148	2.92322	2.95986	2.72233	2.94154	0.21921
106	Adck5	3.87618	3.77596	3.73069	3.86015	3.82607	3.79542	-0.03065
107	ADD1	5.38979	5.62091	5.54059	5.52897	5.50535	5.53478	0.0294295
108	Adf1	5.81962	5.81072	5.73464	5.64556	5.81517	5.6901	-0.125067
109	Adgf-A	4.76101	4.9051	5.01064	4.77288	4.83306	4.89176	0.0587028
110	Adgf-A2	4.38246	3.7562	3.74609	3.45764	4.06933	3.60187	-0.467466
111	Adgf-B	2.42341	2.17533	1.26421	0.840494	2.29937	1.05235	-1.24702
112	Adgf-C	0.343281	0.896342	1.22268	1.27558	0.619811	1.24913	0.62932
113	Adgf-D	3.81637	4.26131	4.50283	4.8691	4.03884	4.68596	0.647125
114	Adgf-E	3.29443	3.14169	2.95896	2.69302	3.21806	2.82599	-0.392069
115	Adh	7.11064	7.92237	8.62229	8.59487	7.51651	8.60858	1.09207
116	Adhr	0.212966	0.428785	1.34103	0.842097	0.320875	1.09156	0.770687
117	Adi1	5.65683	5.85523	5.74023	5.4525	5.75603	5.59636	-0.159664
118	AdipoR	7.43724	7.41502	7.38153	7.16985	7.42613	7.27569	-0.150433
119	Adk1	3.52993	3.34283	3.03565	2.73088	3.43638	2.88326	-0.553118
120	Adk2	5.95657	5.90364	6.72504	6.78261	5.93011	6.75382	0.823715
121	Adk3	4.19438	4.67214	4.95969	5.24553	4.43326	5.10261	0.66935
122	AdoR	3.99342	3.94271	3.39327	3.36792	3.96806	3.3806	-0.587468
123	adp	5.48657	5.45586	5.7686	6.22796	5.47121	5.99828	0.527061
124	AdSL	5.81493	6.00316	6.24746	6.69683	5.90904	6.47215	0.563101
125	AdSS	5.95265	6.14556	5.99956	6.13424	6.0491	6.0669	0.0177981
126	Aduk	4.01203	4.08781	4.13743	4.10178	4.04992	4.11961	0.069687
127	Ae2	5.58099	5.7994	5.52488	5.48851	5.6902	5.5067	-0.183501
128	Aef1	5.25737	5.36459	5.32167	5.29958	5.31098	5.31062	-0.00035839
129	Afg3l2	6.27764	6.28084	6.17933	6.56159	6.27924	6.37046	0.091224
130	aft	4.63904	4.70928	4.94985	4.83534	4.67416	4.8926	0.218435
131	Afti	5.3292	5.27013	5.23368	5.1693	5.29967	5.20149	-0.0981768
132	Ag5r	6.31638	6.2895	5.9891	5.25876	6.30294	5.62393	-0.679011
133	Ag5r2	8.55076	9.21564	9.17873	8.6714	8.8832	8.92507	0.0418672
134	AGBE	4.33952	4.55627	4.79005	4.85854	4.44789	4.82429	0.3764
135	AgmNAT	1.68714	1.53906	0.032789	0.196499	1.6131	0.114644	-1.49846
136	ago	7.04279	7.10608	6.94321	7.13244	7.07444	7.03783	-0.0366105
137	AGO1	8.31908	8.50779	8.19987	8.21974	8.41344	8.2098	-0.203633
138	AGO2	8.36779	8.60862	8.24184	8.54185	8.48821	8.39185	-0.0963613
139	AGO3	2.59337	2.58569	2.90087	2.07205	2.58953	2.48646	-0.103069
140	Agpat1	4.11952	4.11413	3.57198	3.21664	4.11682	3.39431	-0.722514
141	Agpat2	5.85199	5.16839	5.82202	5.63812	5.51019	5.73007	0.219879
142	Agpat3	6.65589	6.55171	6.64055	6.61466	6.6038	6.6276	0.0238017
143	Agpat4	1.68508	2.04296	2.95634	2.30049	1.86402	2.62842	0.764398
144	Agps	2.91393	2.90884	3.38197	3.60629	2.91138	3.49413	0.582746
145	agt	2.18732	2.07909	1.47232	1.86983	2.1332	1.67107	-0.462129
146	Agxt	4.71425	5.18498	5.15583	5.47993	4.94961	5.31788	0.368266
147	Ahcy	6.62119	6.73812	6.80727	7.07017	6.67965	6.93872	0.259067
148	AhcyL1	6.9057	7.06409	6.98151	6.90621	6.98489	6.94386	-0.0410376
149	AhcyL2	6.7617	6.56676	6.5712	6.6424	6.66423	6.6068	-0.0574312
150	AIF	5.59282	5.56372	5.55381	5.72803	5.57827	5.64092	0.0626498
151	AIMP1	4.64506	4.56824	4.93088	5.22733	4.60665	5.0791	0.472451
152	AIMP2	5.42018	5.39498	5.6188	5.57933	5.40758	5.59906	0.191484
153	AIMP3	4.07549	4.06417	4.41612	4.6095	4.06983	4.51281	0.442983
154	ais	2.69032	3.01123	3.00641	3.20784	2.85077	3.10713	0.256357
155	Ak1	5.02362	4.79246	4.74547	5.31267	4.90804	5.02907	0.121028
156	Ak2	5.83036	5.92562	5.99778	6.06018	5.87799	6.02898	0.150995
157	Ak3	5.42468	5.39643	5.58787	5.52512	5.41056	5.55649	0.145934
158	Ak6	2.69064	2.68307	2.81644	2.46291	2.68686	2.63968	-0.0471814
159	Akap200	10.0372	9.94013	9.69062	9.84872	9.98867	9.76967	-0.218998
160	Akh	1.9197	1.63397	1.5624	1.50913	1.77683	1.53577	-0.241067
161	AkhR	4.49945	4.70636	4.74334	4.7082	4.6029	4.72577	0.122866
162	akirin	8.20479	8.15573	8.25862	8.24924	8.18026	8.25393	0.0736676
163	Akr1B	5.818	5.83851	6.1783	5.81626	5.82826	5.99728	0.169024
164	Akt	7.19658	7.26522	7.02449	6.89399	7.2309	6.95924	-0.27166
165	al	4.0148	3.90656	3.97749	4.04271	3.96068	4.0101	0.0494232
166	Aladin	4.14422	4.15543	4.31481	4.37119	4.14982	4.343	0.193175
167	AlaRS	6.96714	6.98838	7.03741	7.06685	6.97776	7.05213	0.0743695
168	AlaRS-m	3.91507	4.18381	4.01797	4.08646	4.04944	4.05222	0.00277521
169	Alas	5.62065	5.48036	5.13123	5.25712	5.5505	5.19418	-0.356329
170	alc	6.13068	5.77848	5.87487	6.32488	5.95458	6.09987	0.145298
171	Ald1	8.7959	9.4652	9.47113	9.83711	9.13055	9.65412	0.523572
172	Ald2	4.23301	3.66358	3.77707	3.48258	3.94829	3.62983	-0.318468
173	Aldh	6.20085	6.57673	6.48891	6.37105	6.38879	6.42998	0.041194
174	Aldh-III	6.70402	6.94723	6.98698	7.15561	6.82562	7.0713	0.245676
175	Aldh7A1	5.96041	6.06083	6.16835	6.26979	6.01062	6.21907	0.208452
176	Alg-2	5.69595	5.53801	5.88755	5.24986	5.61698	5.56871	-0.048274
177	Alg1	5.19447	5.19359	5.1413	5.37975	5.19403	5.26053	0.0664935
178	Alg10	4.31092	4.35946	4.47536	4.50981	4.33519	4.49258	0.157392
179	Alg11	5.86576	5.97379	6.07934	6.0168	5.91977	6.04807	0.128297
180	Alg12	4.22144	4.60578	4.52769	4.33727	4.41361	4.43248	0.0188718
181	Alg13	1.9956	1.88331	1.68434	1.65966	1.93946	1.672	-0.267457
182	Alg14	2.25065	2.21813	2.55568	2.54309	2.23439	2.54938	0.314993
183	Alg2	5.25092	5.1345	5.45264	5.54394	5.19271	5.49829	0.305575
184	Alg3	3.76828	3.78587	3.7687	4.08145	3.77708	3.92508	0.147999
185	Alg7	4.14504	4.36418	4.20545	4.15076	4.25461	4.17811	-0.0765019
186	Alg9	4.71568	4.84955	4.73977	4.63755	4.78262	4.68866	-0.0939555
187	Alh	6.4325	6.50904	6.28964	6.41199	6.47077	6.35081	-0.119958
188	alien	5.94341	6.00662	6.21295	6.02605	5.97501	6.1195	0.144488
189	ALiX	7.15207	7.13413	7.10628	7.18225	7.1431	7.14427	0.00116542
190	Alk	5.28998	5.47521	4.81944	5.01058	5.3826	4.91501	-0.467589
191	AlkB	2.91151	2.91872	3.19412	2.16091	2.91511	2.67752	-0.237597
192	Alms1a	5.08188	4.9049	5.32018	5.47507	4.99339	5.39763	0.404238
193	Alms1b	3.58396	3.21062	3.31774	3.52036	3.39729	3.41905	0.0217586
194	Alp1	7.85571	8.27068	8.31237	8.35643	8.06319	8.3344	0.271208
195	Alp10	4.29731	4.30931	1.90833	2.886	4.30331	2.39716	-1.90615
196	Alp11	2.14154	2.3223	1.99803	2.07143	2.23192	2.03473	-0.197189
197	Alp12	3.80739	4.09247	4.37535	4.65451	3.94993	4.51493	0.565
198	Alp13	0.875431	1.16487	1.36426	0.606175	1.02015	0.985218	-0.0349343
199	Alp4	6.88438	6.44276	6.75399	6.66598	6.66357	6.70999	0.0464191
200	Alp5	5.42875	5.70822	5.79988	5.92763	5.56849	5.86376	0.295269
201	Alp6	4.68973	5.17141	5.35734	5.39792	4.93057	5.37763	0.447063
202	Alp7	7.00495	7.80561	6.43079	6.76197	7.40528	6.59638	-0.808905
203	Alp8	3.41453	4.97924	3.46283	3.67129	4.19688	3.56706	-0.629824
204	Alp9	4.34249	4.2906	2.2027	3.5058	4.31655	2.85425	-1.4623
205	alph	7.20362	7.25721	7.21854	7.2428	7.23042	7.23067	0.000251761
206	alpha-Cat	7.35339	7.44961	7.31077	6.79421	7.4015	7.05249	-0.349014
207	alpha-Catr	2.50436	2.64733	2.06298	2.30388	2.57585	2.18343	-0.392418
208	alpha-Est1	5.30559	5.58905	5.9756	5.97978	5.44732	5.97769	0.53037
209	alpha-Est10	3.31705	3.24849	3.48238	2.74005	3.28277	3.11122	-0.171553
210	alpha-Est2	3.57112	4.21427	4.53189	3.9638	3.89269	4.24784	0.355149
211	alpha-Est3	5.72119	5.78507	5.82799	5.8946	5.75313	5.86129	0.108166
212	alpha-Est4	3.96037	4.56396	4.59347	4.50058	4.26216	4.54702	0.284863
213	alpha-Est5	4.29037	4.65903	5.10001	4.73921	4.4747	4.91961	0.444909
214	alpha-Est6	2.8757	2.49023	2.88796	2.66368	2.68296	2.77582	0.0928537
215	alpha-Est7	5.43615	5.53563	5.64724	5.66333	5.48589	5.65529	0.169398
216	alpha-Est8	3.07484	3.06479	3.44937	3.10378	3.06981	3.27658	0.206762
217	alpha-Est9	4.99894	5.61722	5.32328	5.27427	5.30808	5.29878	-0.00930344
218	alpha-Man-Ia	5.52222	5.53928	5.51821	5.20855	5.53075	5.36338	-0.16737
219	alpha-Man-Ib	5.16385	5.33175	5.13044	5.07779	5.2478	5.10412	-0.143679
220	alpha-Man-IIa	5.58705	5.7267	5.71207	5.86197	5.65687	5.78702	0.130148
221	alpha-Man-IIb	4.32045	4.11522	3.87526	3.81016	4.21783	3.84271	-0.375128
222	alpha-PheRS	5.45098	5.44243	5.60591	5.84562	5.4467	5.72577	0.279061
223	alpha-Spec	8.45519	8.71916	8.22523	8.46418	8.58718	8.34471	-0.242468
224	alpha4GT1	5.26199	5.08705	5.14742	4.99947	5.17452	5.07344	-0.101077
225	alphaCOP	7.18837	7.37601	7.27926	7.45811	7.28219	7.36869	0.0864954
226	alphaKap4	2.92449	2.4914	2.11596	0.574926	2.70795	1.34544	-1.3625
227	alphaSnap	7.22605	7.05245	7.20476	7.04899	7.13925	7.12687	-0.0123748
228	alphaTry	8.14054	8.45621	8.66262	8.40698	8.29838	8.5348	0.236421
229	alphaTub84B	11.0692	11.0904	11.2207	11.4921	11.0798	11.3564	0.276592
230	alphaTub84D	6.5631	6.54123	6.65208	6.74309	6.55217	6.69758	0.145415
231	alphaTub85E	3.59412	3.573	3.82268	4.45487	3.58356	4.13877	0.555211
232	Alr	3.4638	3.38997	3.36132	3.74697	3.42688	3.55414	0.127264
233	alrm	2.90351	2.8901	3.06821	2.72858	2.89681	2.89839	0.00158383
234	Als2	6.02858	6.16248	5.97136	5.97842	6.09553	5.97489	-0.120642
235	alt	9.09549	9.05602	9.078	9.11079	9.07576	9.09439	0.0186365
236	aly	1.88621	1.76438	2.45244	2.84637	1.82529	2.6494	0.82411
237	Ama	8.61692	8.21345	8.33816	8.70146	8.41518	8.51981	0.104623
238	Amacr	4.19625	4.02232	4.07648	4.42331	4.10929	4.24989	0.140607
239	amd	1.05416	0.868892	0.698939	1.04381	0.961526	0.871374	-0.0901524
240	amn	-0.800696	0.0924534	0.122464	-0.811992	-0.354121	-0.344764	0.0093568
241	Amnionless	3.49177	3.30699	3.70705	3.67679	3.39938	3.69192	0.292541
242	amon	4.11277	4.25004	3.81427	3.825	4.1814	3.81964	-0.361768
243	AMPdeam	8.31668	8.4398	8.55278	8.72899	8.37824	8.64088	0.262641
244	Amph	5.59793	5.83539	5.59489	5.32469	5.71666	5.45979	-0.256866
245	AMPKalpha	6.79851	6.9925	6.84441	7.09089	6.89551	6.96765	0.0721418
246	amrt	2.9486	2.76954	2.7993	3.10643	2.85907	2.95287	0.0938016
247	Amun	7.63149	7.78077	7.70242	8.03894	7.70613	7.87068	0.164554
248	amx	3.26499	3.15327	3.17948	3.28141	3.20913	3.23045	0.0213172
249	Amy-d	6.05388	7.1997	7.21791	8.68557	6.62679	7.95174	1.32495
250	Amy-p	4.83204	5.99291	5.82195	7.8461	5.41247	6.83402	1.42155
251	Amyrel	0.0802921	1.53465	2.63907	3.56575	0.807471	3.10241	2.29493
252	ana	3.77995	4.12149	3.64837	3.8745	3.95072	3.76144	-0.189283
253	ana1	5.58319	5.46335	5.3188	5.19697	5.52327	5.25788	-0.26539
254	ana2	3.25409	3.43282	3.34537	3.08537	3.34346	3.21537	-0.128087
255	ana3	4.3299	4.38368	4.55424	4.55349	4.35679	4.55387	0.19708
256	Ance	9.17027	9.15724	9.25238	9.53357	9.16375	9.39297	0.22922
257	Ance-3	0.679794	0.709736	0.584736	0.320903	0.694765	0.452819	-0.241946
258	Ance-4	6.00791	6.0685	6.24036	6.6045	6.0382	6.42243	0.384225
259	Ance-5	4.3247	5.06426	4.36888	4.43529	4.69448	4.40208	-0.292401
260	anchor	5.39909	5.2344	4.9819	4.63675	5.31675	4.80933	-0.507421
261	Andorra	0.637678	0.790423	-0.17334	0.0670623	0.71405	-0.053139	-0.767189
262	angel	3.33766	3.16116	3.43242	3.55854	3.24941	3.49548	0.246069
263	Ank	8.44833	8.62242	8.38936	7.85853	8.53538	8.12394	-0.411432
264	Ank2	7.04032	7.35475	7.07702	6.87667	7.19754	6.97684	-0.220697
265	Ankle2	6.25336	6.46226	6.32905	6.51879	6.35781	6.42392	0.0661129
266	Ankrd49	3.24302	3.2994	3.55407	3.86054	3.27121	3.70731	0.436096
267	anne	8.07325	8.2962	7.91556	7.17864	8.18472	7.5471	-0.637622
268	anox	4.96159	4.81656	5.07867	5.30467	4.88907	5.19167	0.302598
269	Ant2	4.58713	4.17956	4.87888	4.98317	4.38335	4.93102	0.547679
270	Antdh	-0.919448	-0.684911	2.71845	3.42543	-0.802179	3.07194	3.87412
271	Antp	5.25978	5.38963	5.03514	4.82984	5.32471	4.93249	-0.392216
272	AnxB10	5.62672	5.46631	5.84215	6.3907	5.54651	6.11642	0.569906
273	AnxB11	6.41332	6.37279	6.30809	6.38658	6.39305	6.34733	-0.0457186
274	AnxB9	8.21908	8.25383	8.25813	8.63627	8.23646	8.4472	0.210744
275	aop	6.99446	6.45686	6.30311	6.14886	6.72566	6.22599	-0.499677
276	aos	3.17944	3.28953	3.19121	2.93895	3.23448	3.06508	-0.169404
277	Aos1	5.54042	5.4338	5.83057	5.76772	5.48711	5.79914	0.312029
278	AOX1	5.57194	6.21429	5.88546	6.18027	5.89311	6.03286	0.13975
279	AOX2	2.55656	2.88706	3.66922	3.43242	2.72181	3.55082	0.829013
280	AOX3	6.30894	6.5352	5.96583	5.96276	6.42207	5.96429	-0.457778
281	ap	5.6273	5.74247	5.58934	5.43537	5.68489	5.51236	-0.172531
282	AP-1-2beta	6.88761	6.92899	6.88814	7.12651	6.9083	7.00733	0.0990263
283	AP-1gamma	6.7047	6.86178	6.63102	6.56716	6.78324	6.59909	-0.184147
284	AP-1mu	6.02763	5.94522	6.06564	6.194	5.98642	6.12982	0.143396
285	AP-1sigma	5.60554	5.6926	5.66603	4.98782	5.64907	5.32693	-0.322146
286	AP-2alpha	7.27221	7.36778	7.17328	6.99271	7.32	7.083	-0.237
287	AP-2mu	6.6241	6.44086	6.56149	6.68246	6.53248	6.62198	0.0894949
288	AP-2sigma	5.52453	5.42829	5.66803	5.39489	5.47641	5.53146	0.0550522
289	Apc	6.34042	6.62616	6.20888	6.28829	6.48329	6.24859	-0.234703
290	APC10	2.99642	3.1269	3.34814	3.01542	3.06166	3.18178	0.120119
291	Apc2	4.66501	4.60629	4.82312	4.63703	4.63565	4.73008	0.094428
292	APC4	3.67796	3.58656	3.6304	3.70642	3.63226	3.66841	0.0361477
293	ApepP	6.70315	6.64717	6.78461	6.70337	6.67516	6.74399	0.0688304
294	aph-1	4.8782	4.62259	4.96517	4.91642	4.75039	4.94079	0.190401
295	aPKC	6.51314	6.59417	6.45068	6.23955	6.55365	6.34512	-0.208537
296	Apl	5.82203	5.65984	5.66844	5.56903	5.74093	5.61873	-0.122202
297	Aplip1	3.40791	3.66827	3.04224	3.48617	3.53809	3.2642	-0.273883
298	apolpp	11.3052	11.7997	11.2901	10.6324	11.5525	10.9612	-0.591229
299	Apoltp	5.32558	5.52547	4.87499	4.46721	5.42552	4.6711	-0.75442
300	app	6.34735	6.43647	6.3656	6.39254	6.39191	6.37907	-0.0128384
301	APP-BP1	5.21584	4.97579	5.07736	5.23449	5.09581	5.15593	0.0601123
302	Appl	6.65058	6.84341	6.43764	6.37423	6.747	6.40594	-0.34106
303	Aprt	3.53469	3.56747	3.88035	3.63209	3.55108	3.75622	0.205142
304	Aps	7.82884	7.82327	7.78708	7.63261	7.82605	7.70985	-0.116207
305	apt	4.56382	4.84911	4.67665	4.86911	4.70646	4.77288	0.0664163
306	Apt1	5.72804	5.8147	5.96391	6.09868	5.77137	6.03129	0.259919
307	AQP	1.76263	1.88518	2.05172	1.93191	1.82391	1.99182	0.167911
308	aqz	8.88014	9.06145	8.71081	8.41648	8.9708	8.56365	-0.40715
309	ara	4.32265	4.25531	4.10529	4.24962	4.28898	4.17745	-0.111524
310	aralar1	6.23736	6.24315	6.09214	6.18113	6.24025	6.13664	-0.103612
311	Arc1	9.93829	10.5968	10.1804	10.423	10.2675	10.3017	0.0341401
312	Arc2	2.95548	3.14221	3.15552	2.97371	3.04884	3.06461	0.0157672
313	Arc42	5.69964	5.69787	5.77681	6.07354	5.69876	5.92518	0.226417
314	Archease	3.06041	2.98359	3.23342	3.3272	3.022	3.28031	0.258308
315	Arf1	9.12036	9.13492	9.23975	8.97247	9.12764	9.10611	-0.0215328
316	Arf4	6.4709	6.29307	6.68104	5.93242	6.38198	6.30673	-0.0752585
317	Arf6	6.55066	6.44945	6.51444	6.18478	6.50006	6.34961	-0.150448
318	ArfGAP1	6.07254	5.95862	6.16112	6.17614	6.01558	6.16863	0.153045
319	ArfGAP3	6.45079	6.5545	6.48419	6.60996	6.50264	6.54707	0.0444275
320	Arfip	5.16959	5.10409	5.08099	5.3533	5.13684	5.21714	0.0803031
321	Arfrp1	3.38817	3.44007	3.47074	3.27502	3.41412	3.37288	-0.0412424
322	arg	0.407222	0.501664	1.26311	1.73109	0.454443	1.4971	1.04266
323	Argk1	9.59214	10.4818	10.8508	11.0232	10.037	10.937	0.90003
324	Argk2	4.1318	3.63585	3.64221	3.59198	3.88382	3.61709	-0.26673
325	Argl	5.57643	5.53269	5.96709	6.05592	5.55456	6.0115	0.456939
326	Argp	0.471184	0.439416	0.872183	0.557716	0.4553	0.714949	0.259649
327	ArgRS	5.63649	5.69837	5.71777	5.50778	5.66743	5.61277	-0.0546601
328	ArgRS-m	3.34325	3.27948	3.48453	3.21933	3.31137	3.35193	0.0405608
329	ari-1	6.42922	6.37801	6.40932	6.43863	6.40361	6.42397	0.0203632
330	ari-2	5.77013	5.77537	5.67169	5.81168	5.77275	5.74169	-0.0310651
331	Arl1	5.56647	5.4523	5.65956	5.56855	5.50938	5.61405	0.104667
332	Arl2	3.78595	3.74622	3.81666	3.63001	3.76608	3.72333	-0.0427489
333	Arl4	5.61056	5.65228	5.68383	4.79038	5.63142	5.23711	-0.394316
334	Arl5	4.7146	4.65546	4.69905	4.44163	4.68503	4.57034	-0.114688
335	Arl6IP1	5.78829	5.62293	5.78648	5.36795	5.70561	5.57721	-0.1284
336	Arl8	5.88876	5.81405	5.9127	5.82231	5.8514	5.86751	0.0161023
337	arm	8.74558	8.79251	8.68714	8.7136	8.76905	8.70037	-0.0686788
338	armi	4.62815	3.42727	1.91535	3.73695	4.02771	2.82615	-1.20156
339	Arp1	6.7868	6.70001	6.8818	6.95853	6.74341	6.92016	0.176758
340	Arp10	4.34949	4.23527	4.34668	4.82629	4.29238	4.58649	0.294109
341	Arp2	6.98229	7.12413	6.95391	6.93651	7.05321	6.94521	-0.108002
342	Arp3	6.47557	6.50723	6.59793	6.72819	6.4914	6.66306	0.171665
343	Arp5	4.34345	4.09671	4.27786	4.57628	4.22008	4.42707	0.20699
344	Arp53D	4.77896	4.24938	4.33166	4.38904	4.51417	4.36035	-0.153822
345	Arp6	4.8691	4.78752	4.904	5.07199	4.82831	4.988	0.15969
346	Arp8	3.34422	3.34824	3.50506	3.85228	3.34623	3.67867	0.332439
347	Arpc1	7.55658	7.40907	7.69275	8.02361	7.48283	7.85818	0.375349
348	Arpc2	6.95593	6.93777	7.08326	6.84433	6.94685	6.96379	0.016942
349	Arpc3A	5.30338	5.12636	5.44924	5.31354	5.21487	5.38139	0.166517
350	Arpc3B	5.03385	4.7268	4.80537	4.09552	4.88033	4.45044	-0.429883
351	Arpc4	5.63592	5.45449	5.77174	6.08326	5.54521	5.9275	0.382297
352	Arpc5	5.89144	5.67974	6.0131	6.30628	5.78559	6.15969	0.374101
353	arr	6.23476	6.39087	6.17664	6.2234	6.31282	6.20002	-0.112794
354	Arr1	1.95507	1.72858	1.89059	1.46926	1.84182	1.67992	-0.161903
355	Ars2	6.82912	6.9886	6.86324	6.84117	6.90886	6.85221	-0.056654
356	Art1	5.76063	5.73241	5.92214	6.03554	5.74652	5.97884	0.232323
357	Art2	0.932205	0.756457	1.8743	1.95548	0.844331	1.91489	1.07056
358	Art3	4.34415	4.36056	4.53979	4.37229	4.35235	4.45604	0.103688
359	Art4	5.6228	5.94003	5.60539	5.68796	5.78141	5.64667	-0.13474
360	Art6	0.424351	0.668361	1.20961	1.64115	0.546356	1.42538	0.879023
361	Art7	3.28199	3.40685	3.4371	3.67299	3.34442	3.55504	0.210625
362	Art8	2.74164	2.68682	2.6532	2.81784	2.71423	2.73552	0.0212898
363	Art9	0.263507	-0.155428	0.209605	-0.400947	0.0540392	-0.0956709	-0.14971
364	Arts	5.60667	5.95456	5.76375	5.86017	5.78062	5.81196	0.0313451
365	aru	5.246	5.26274	5.03901	5.40772	5.25437	5.22336	-0.031007
366	Arv1	3.01398	3.12953	3.09815	2.66273	3.07175	2.88044	-0.191314
367	arx	2.76573	2.5742	3.05279	2.74678	2.66997	2.89979	0.229823
368	ARY	1.63795	1.53863	1.82878	0.569949	1.58829	1.19936	-0.388928
369	Asap	5.93839	6.05234	5.81455	5.97156	5.99537	5.89305	-0.102314
370	Asator	5.7521	5.90657	5.50354	5.2338	5.82933	5.36867	-0.460659
371	Asciz	2.40626	2.25109	2.61808	2.26324	2.32868	2.44066	0.111982
372	ase	1.98116	2.16256	2.46789	1.67674	2.07186	2.07232	0.00045719
373	asf1	4.70247	4.66485	4.99104	4.92773	4.68366	4.95939	0.275729
374	ash1	5.82331	5.82355	5.60743	5.62677	5.82343	5.6171	-0.206324
375	ash2	4.90417	4.92854	4.87217	4.93937	4.91635	4.90577	-0.0105817
376	Ask1	5.68287	5.80597	5.83989	5.83778	5.74442	5.83883	0.0944136
377	asl	4.99393	4.95326	4.85296	5.15135	4.97359	5.00216	0.0285615
378	AsnRS	6.42174	6.39485	6.5706	6.75291	6.40829	6.66175	0.25346
379	AsnRS-m	2.69989	2.58576	2.94906	2.63554	2.64282	2.7923	0.149477
380	AsnS	5.30229	6.27409	5.13113	4.22574	5.78819	4.67844	-1.10976
381	asp	5.25076	5.4096	5.22528	5.15145	5.33018	5.18837	-0.141812
382	Asph	7.72329	7.40863	7.56233	7.87904	7.56596	7.72068	0.154727
383	ASPP	5.29632	5.533	5.33923	5.76754	5.41466	5.55339	0.138729
384	aspr	5.01907	5.25348	5.1458	5.79721	5.13628	5.4715	0.335229
385	AspRS	7.51187	7.59701	7.50253	7.64015	7.55444	7.57134	0.0169016
386	AspRS-m	6.03399	6.16033	6.04069	5.96443	6.09716	6.00256	-0.094603
387	asrij	4.13775	4.1055	4.46984	4.64245	4.12163	4.55614	0.434518
388	Ass	3.3602	3.66113	3.85942	4.1246	3.51066	3.99201	0.481348
389	ast	4.01325	3.99788	3.93576	4.0702	4.00557	4.00298	-0.00258704
390	AstA	3.11393	3.36338	3.32697	3.07665	3.23866	3.20181	-0.0368505
391	AstA-R2	3.18938	3.14173	3.20915	3.47346	3.16556	3.34131	0.17575
392	AstC	2.39657	2.83102	3.10295	2.08597	2.61379	2.59446	-0.0193319
393	AstC-R1	1.26021	0.99734	0.395088	0.554572	1.12877	0.47483	-0.653944
394	AstC-R2	2.44881	2.61524	1.9717	1.99525	2.53202	1.98348	-0.548546
395	AstCC	0.644287	0.426362	0.127304	0.678131	0.535325	0.402717	-0.132607
396	asun	3.67013	3.61189	3.66073	3.46668	3.64101	3.5637	-0.0773067
397	Asx	5.75315	5.96611	5.68044	5.75729	5.85963	5.71886	-0.140766
398	Atac1	2.65331	2.69889	2.45944	2.66744	2.6761	2.56344	-0.112663
399	Atac2	3.91924	3.91841	3.85168	3.55472	3.91883	3.7032	-0.21563
400	Atac3	4.0387	4.06639	4.15247	4.02639	4.05254	4.08943	0.0368906
401	Atat	5.75459	5.68158	5.6272	5.58497	5.71808	5.60608	-0.111999
402	ATbp	2.82545	2.87525	2.79741	2.88465	2.85035	2.84103	-0.00931856
403	Ate1	5.0028	5.05641	5.15882	5.19989	5.0296	5.17935	0.14975
404	Atet	7.21601	6.93223	6.78632	6.75091	7.07412	6.76862	-0.305501
405	Atf-2	3.76093	3.69302	3.73612	3.74672	3.72697	3.74142	0.0144479
406	Atf3	5.32369	5.9086	5.12701	5.25596	5.61615	5.19148	-0.424666
407	Atf6	6.45748	6.57727	6.57645	5.57882	6.51738	6.07763	-0.43974
408	Atg1	6.50672	6.63707	6.4473	6.6676	6.57189	6.55745	-0.0144446
409	Atg10	1.62291	1.5383	1.53471	1.21772	1.58061	1.37622	-0.204391
410	Atg101	4.72245	4.7415	4.60483	4.34585	4.73197	4.47534	-0.256629
411	Atg12	2.80531	2.58094	2.70135	2.05453	2.69312	2.37794	-0.315186
412	Atg13	5.82948	5.36486	5.37295	4.89976	5.59717	5.13636	-0.46081
413	Atg14	4.81938	4.71708	4.81505	5.00361	4.76823	4.90933	0.1411
414	Atg16	5.10503	4.91162	5.10826	5.05883	5.00832	5.08354	0.0752193
415	Atg17	6.80922	6.90631	6.52976	6.46218	6.85777	6.49597	-0.361794
416	Atg18a	6.57682	6.4831	6.50245	6.64274	6.52996	6.5726	0.0426372
417	Atg18b	6.3782	6.32429	6.60312	6.59192	6.35125	6.59752	0.246275
418	Atg2	7.57297	7.46581	7.32364	7.39872	7.51939	7.36118	-0.158211
419	Atg3	6.08728	6.03934	6.23208	6.37111	6.06331	6.3016	0.238282
420	Atg4a	6.48778	6.48087	6.56684	6.77506	6.48432	6.67095	0.186628
421	Atg4b	4.94221	4.65563	4.61311	4.46439	4.79892	4.53875	-0.260172
422	Atg5	4.83343	4.78532	4.79806	4.4823	4.80937	4.64018	-0.169194
423	Atg6	4.50533	4.3717	4.53172	4.75142	4.43851	4.64157	0.203054
424	Atg7	6.42404	5.95802	6.37918	6.44336	6.19103	6.41127	0.220241
425	Atg8a	9.35061	9.36765	9.30195	9.02626	9.35913	9.16411	-0.195023
426	Atg8b	3.69434	3.42113	3.24384	3.17748	3.55773	3.21066	-0.347073
427	Atg9	6.68687	6.96758	6.95164	7.20533	6.82722	7.07849	0.251262
428	ath	4.45238	4.56482	4.55391	4.43486	4.5086	4.49439	-0.0142162
429	atilla	4.53878	4.67825	4.61791	4.87964	4.60851	4.74878	0.140266
430	atk	1.75826	1.96784	1.86995	1.44294	1.86305	1.65645	-0.206602
431	atl	7.42111	7.50633	7.47727	7.6436	7.46372	7.56043	0.0967118
432	atlas	2.81574	2.19489	2.31763	1.80049	2.50532	2.05906	-0.446258
433	atms	4.9038	4.8886	4.9975	5.23282	4.8962	5.11516	0.21896
434	ato	1.49887	1.46604	1.65894	1.66031	1.48246	1.65963	0.177169
435	Atox1	5.9468	5.90118	6.32541	6.57309	5.92399	6.44925	0.525257
436	ATP6AP2	7.72138	7.70886	7.97245	8.0701	7.71512	8.02128	0.306156
437	ATP7	6.18307	6.22294	6.06332	6.26832	6.20301	6.16582	-0.0371834
438	ATP8A	5.80322	6.07286	5.76437	5.83615	5.93804	5.80026	-0.137784
439	ATP8B	4.86979	5.35268	4.6335	4.26126	5.11123	4.44738	-0.663856
440	Atpalpha	9.05194	9.34514	8.98458	9.26694	9.19854	9.12576	-0.0727827
441	ATPCL	7.9028	8.04009	8.18659	8.50255	7.97145	8.34457	0.373124
442	ATPsynB	6.76165	6.67131	7.08704	7.39161	6.71648	7.23933	0.522847
443	ATPsynbeta	8.91582	9.07503	9.34091	9.20974	8.99543	9.27533	0.279897
444	ATPsynbetaL	3.56301	3.40784	4.3359	4.55565	3.48543	4.44577	0.960348
445	ATPsynC	9.04745	9.13783	9.30407	9.28195	9.09264	9.29301	0.200373
446	ATPsynCF6	6.25416	6.31253	6.54031	6.67582	6.28335	6.60807	0.324721
447	ATPsynCF6L	3.4259	3.23101	3.05579	2.29198	3.32846	2.67389	-0.654567
448	ATPsynD	6.52723	6.65511	6.96236	7.29179	6.59117	7.12707	0.535903
449	ATPsyndelta	6.32574	6.38356	6.69517	6.6314	6.35465	6.66328	0.308631
450	ATPsynE	6.38718	6.48258	6.77183	6.80146	6.43488	6.78664	0.351768
451	ATPsynepsilonL	1.61755	1.35383	2.78081	2.35165	1.48569	2.56623	1.08054
452	ATPsynF	6.5923	6.57999	7.07252	7.29603	6.58614	7.18428	0.598131
453	ATPsynG	6.50121	6.45337	6.95334	7.10432	6.47729	7.02883	0.551534
454	ATPsyngamma	7.14232	7.12593	7.48828	7.74029	7.13412	7.61428	0.48016
455	ATPsynGL	3.19222	3.22407	3.23937	3.09994	3.20815	3.16965	-0.0384954
456	ATPsynO	6.4359	6.49348	6.90218	7.11678	6.46469	7.00948	0.544791
457	AttB	0.677867	0.646109	0.9927	0.553143	0.661988	0.772922	0.110933
458	AttC	0.177932	1.55696	0.520014	-0.127574	0.867447	0.19622	-0.671227
459	AttD	1.20455	0.398	2.58632	1.29746	0.801275	1.94189	1.14061
460	Atu	5.47042	5.49915	5.64084	5.98382	5.48479	5.81233	0.327543
461	Atx2	7.43262	7.42211	7.19657	7.29147	7.42736	7.24402	-0.183345
462	Atxn7	5.31879	5.35421	5.42282	5.45875	5.3365	5.44078	0.104281
463	aub	1.91478	1.66316	2.90998	2.96383	1.78897	2.93691	1.14793
464	aurA	4.1346	3.89069	4.12077	4.14301	4.01265	4.13189	0.119246
465	aurB	4.13535	4.01204	4.41495	4.62192	4.07369	4.51844	0.444744
466	aus	7.62755	7.59889	7.30272	7.43616	7.61322	7.36944	-0.24378
467	aust	1.46541	1.5907	1.61994	1.89353	1.52805	1.75674	0.228683
468	aux	6.14489	6.31339	6.17066	6.06604	6.22914	6.11835	-0.110795
469	ave	3.44503	3.22413	3.56571	3.17233	3.33458	3.36902	0.0344385
470	Aven	2.08563	2.37955	2.76085	2.98093	2.23259	2.87089	0.638304
471	awd	8.41856	8.25587	8.67929	9.13728	8.33721	8.90828	0.571069
472	Awh	2.60901	2.58188	2.56786	2.42525	2.59544	2.49656	-0.098886
473	axed	4.29596	4.45221	3.63201	4.66559	4.37409	4.1488	-0.225286
474	Axn	6.0342	6.1955	6.0825	6.20116	6.11485	6.14183	0.0269869
475	axo	5.55229	5.76647	5.6754	5.79014	5.65938	5.73277	0.0733844
476	Axs	4.93453	5.12268	5.11563	5.18732	5.0286	5.15147	0.12287
477	Axud1	5.26523	5.24656	5.09309	5.12884	5.25589	5.11096	-0.144931
478	az2	3.51489	3.47205	3.40673	3.55139	3.49347	3.47906	-0.0144104
479	azot	1.76132	1.87345	1.71327	1.49381	1.81738	1.60354	-0.21384
480	b	7.1415	5.22443	5.70817	4.93546	6.18297	5.32182	-0.861151
481	B-H1	2.31403	2.05898	2.25836	2.12629	2.18651	2.19232	0.00581745
482	B-H2	2.87859	2.75476	2.35825	2.70923	2.81668	2.53374	-0.282933
483	B4	6.03668	6.11603	5.92458	5.77275	6.07636	5.84867	-0.22769
484	B52	7.92912	8.14313	8.11385	8.34745	8.03612	8.23065	0.194528
485	b6	1.68185	0.349672	0.635614	1.09009	1.01576	0.86285	-0.152909
486	B9d1	3.00758	2.24598	2.95498	3.49396	2.62678	3.22447	0.597686
487	B9d2	1.16159	1.09388	2.1431	1.92581	1.12774	2.03446	0.906719
488	bab1	2.90118	2.8598	2.30492	2.71363	2.88049	2.50928	-0.371215
489	bab2	6.10955	6.02795	5.73781	5.58481	6.06875	5.66131	-0.407443
490	babo	6.79901	6.95523	6.71216	6.44988	6.87712	6.58102	-0.296101
491	babos	5.52068	5.00017	5.14603	4.90967	5.26043	5.02785	-0.232576
492	Bacc	9.11728	9.21464	9.21203	9.0591	9.16596	9.13557	-0.0303951
493	Bace	3.3662	4.18033	3.69941	4.52994	3.77327	4.11467	0.341408
494	baf	5.55725	5.46504	5.82014	5.8979	5.51115	5.85902	0.347875
495	bai	6.89563	6.76016	7.12564	7.15771	6.8279	7.14168	0.313778
496	Balat	0.420921	1.18535	0.840854	-0.0033043	0.803137	0.418775	-0.384362
497	Baldspot	6.31878	6.53514	6.74061	6.65634	6.42696	6.69847	0.271514
498	ball	5.02937	5.13808	5.27717	5.32561	5.08373	5.30139	0.217663
499	bam	0.278098	-0.593903	0.964303	1.0251	-0.157903	0.994702	1.1526
500	bap	0.261615	-0.157577	-0.238786	0.541444	0.0520188	0.151329	0.0993105
501	Bap111	6.10944	6.3018	6.166	6.64748	6.20562	6.40674	0.201117
502	Bap170	5.43611	5.71676	5.56197	5.79527	5.57644	5.67862	0.102185
503	Bap55	5.07161	5.22515	5.35219	5.26398	5.14838	5.30809	0.15971
504	Bap60	6.38611	6.38455	6.34484	6.55048	6.38533	6.44766	0.0623266
505	BaraA1	2.44468	-3.2747	3.46747	0.681153	-0.415012	2.07431	2.48932
506	BaraA2	4.14301	4.42934	1.11461	3.72097	4.28617	2.41779	-1.86838
507	barc	5.43709	5.51737	5.56861	5.60888	5.47723	5.58874	0.111512
508	bark	6.98513	7.06775	6.67673	6.26486	7.02644	6.4708	-0.555646
509	barr	5.12972	5.24295	5.08705	5.15673	5.18633	5.12189	-0.0644431
510	baz	5.65417	5.72445	5.56722	5.44129	5.68931	5.50425	-0.185053
511	bb8	5.05683	4.66138	4.63692	4.56115	4.85911	4.59903	-0.260075
512	bbc	6.71735	6.62134	6.62162	6.74447	6.66934	6.68305	0.0137015
513	Bbd	6.53728	6.48962	6.3987	6.47904	6.51345	6.43887	-0.0745799
514	bbg	7.15189	7.14194	6.86317	6.79239	7.14691	6.82778	-0.319135
515	BBIP1	4.27123	4.23381	4.42288	4.4777	4.25252	4.45029	0.197773
516	bbx	6.3327	6.44832	6.46796	6.57432	6.39051	6.52114	0.130633
517	bc10	5.10053	5.16862	5.02569	4.74199	5.13458	4.88384	-0.250738
518	BCAS2	3.63908	3.65822	4.15221	4.21089	3.64865	4.18155	0.532899
519	bchs	6.58734	6.59951	6.63058	6.59813	6.59342	6.61436	0.0209341
520	BCL7-like	4.65382	4.66771	4.59616	4.68911	4.66076	4.64264	-0.0181282
521	bcn92	4.2031	4.10231	4.31075	4.23558	4.1527	4.27316	0.120461
522	Bcs1	2.39538	2.49043	2.40755	2.67862	2.44291	2.54309	0.100181
523	Bdbt	3.96767	3.85046	4.0845	3.96378	3.90907	4.02414	0.115074
524	bdg	5.75476	5.7505	5.72226	6.13428	5.75263	5.92827	0.175636
525	bdl	2.83202	2.81934	2.46695	2.58495	2.82568	2.52595	-0.299727
526	Bdp1	4.63639	4.45191	4.62303	4.66997	4.54415	4.6465	0.102351
527	be	5.44443	5.60598	5.31413	5.28627	5.5252	5.3002	-0.225002
528	BEAF-32	5.43522	5.39854	5.54729	5.48174	5.41688	5.51451	0.0976329
529	beag	4.46778	4.47689	4.44818	4.75177	4.47233	4.59998	0.127645
530	beat-Ia	2.11937	2.33919	1.55041	1.60039	2.22928	1.5754	-0.653879
531	beat-Ib	0.562294	0.865329	-0.301795	-0.443098	0.713811	-0.372447	-1.08626
532	beat-Ic	1.2921	1.59464	0.452706	0.284241	1.44337	0.368473	-1.0749
533	beat-IIa	3.33165	3.22158	2.68366	2.06087	3.27662	2.37227	-0.904354
534	beat-IIb	1.81753	1.46927	1.4501	0.68249	1.6434	1.0663	-0.577107
535	beat-IIIa	1.21017	0.425965	-0.0990941	1.33492	0.818068	0.617915	-0.200153
536	beat-IIIb	0.872509	0.893911	0.0161932	0.266654	0.88321	0.141423	-0.741786
537	beat-IIIc	3.61858	3.69365	3.50753	3.20752	3.65612	3.35752	-0.298592
538	beat-IV	2.54519	2.41539	1.92537	2.03495	2.48029	1.98016	-0.500134
539	beat-Va	1.44586	1.72085	0.800294	0.0167699	1.58335	0.408532	-1.17482
540	beat-Vb	0.870672	1.03716	0.538886	0.718054	0.953917	0.62847	-0.325447
541	beat-Vc	0.171992	0.425445	0.281696	0.0464563	0.298718	0.164076	-0.134642
542	beat-VI	2.81263	2.71837	2.5454	2.69929	2.7655	2.62235	-0.143149
543	beat-VII	2.46679	2.64588	2.11669	1.47573	2.55633	1.79621	-0.760126
544	beg	3.0108	3.09295	3.46882	3.48739	3.05187	3.4781	0.426229
545	bel	8.13647	8.18241	8.04973	8.36178	8.15944	8.20576	0.0463171
546	Bem46	4.4547	4.39385	4.49749	4.49437	4.42427	4.49593	0.0716518
547	ben	8.26923	8.16011	8.31928	8.38181	8.21467	8.35054	0.135872
548	Best1	4.9972	5.25822	5.00583	5.17303	5.12771	5.08943	-0.0382785
549	Best2	4.9614	5.08902	4.92447	5.23669	5.02521	5.08058	0.0553693
550	Best3	2.28394	1.96205	2.85568	2.9547	2.123	2.90519	0.782189
551	Best4	1.51489	1.33167	2.06876	1.72825	1.42328	1.8985	0.475227
552	Bet1	4.69355	4.82409	4.95802	4.84565	4.75882	4.90183	0.14301
553	Bet3	4.69191	4.60546	4.79938	4.96437	4.64868	4.88187	0.233186
554	Bet5	3.84103	3.73469	3.72307	3.76874	3.78786	3.7459	-0.0419517
555	beta'COP	7.14547	7.1713	7.28701	7.38076	7.15839	7.33389	0.1755
556	beta-Man	6.64831	6.88696	6.63661	6.52062	6.76763	6.57861	-0.189019
557	beta-PheRS	5.27469	5.35683	5.52168	5.63701	5.31576	5.57935	0.263585
558	beta-Spec	8.33922	8.6288	8.19051	8.38876	8.48401	8.28964	-0.194371
559	beta3GalTII	2.48024	2.32294	2.79623	2.8078	2.40159	2.80202	0.400431
560	beta4GalNAcTA	4.11503	4.26565	4.42576	4.21302	4.19034	4.31939	0.129049
561	beta4GalNAcTB	4.67318	4.7839	4.86758	5.02606	4.72854	4.94682	0.21828
562	beta4GalT7	3.60924	3.46739	3.73675	3.81171	3.53832	3.77423	0.235916
563	betaCOP	7.24092	7.3416	7.27234	7.56969	7.29126	7.42101	0.129754
564	betaggt-I	5.37663	5.1551	5.27807	5.20312	5.26587	5.2406	-0.0252704
565	betaGlu	4.66247	4.76806	4.75078	4.53546	4.71526	4.64312	-0.0721465
566	betaNACtes1	0.305613	-0.100703	1.09674	1.22015	0.102455	1.15844	1.05599
567	betaNACtes2	0.529795	-0.663296	2.35238	2.29468	-0.0667505	2.32353	2.39028
568	betaNACtes3	1.36252	0.822624	2.1699	2.06865	1.09257	2.11928	1.0267
569	betaNACtes4	1.49394	1.23342	2.52925	2.6014	1.36368	2.56533	1.20165
570	betaNACtes6	-1.85836	-3.01603	1.33585	1.45536	-2.4372	1.3956	3.8328
571	betaTry	8.21326	9.16204	9.36995	9.50953	8.68765	9.43974	0.752089
572	betaTub56D	10.5863	10.6425	10.734	11.015	10.6144	10.8745	0.26009
573	betaTub60D	8.78047	8.62635	8.63575	8.8828	8.70341	8.75927	0.0558675
574	betaTub65B	3.26336	2.75685	2.75844	2.58364	3.0101	2.67104	-0.339063
575	betaTub85D	7.54692	7.16851	6.90662	6.89444	7.35772	6.90053	-0.457186
576	betaTub97EF	3.6917	4.04299	4.04785	3.93913	3.86735	3.99349	0.126142
577	Bfc	5.18334	4.7041	4.6789	4.62983	4.94372	4.65436	-0.289358
578	Bgb	4.69363	4.62007	4.66812	4.98777	4.65685	4.82794	0.171092
579	bgcn	3.06167	2.91354	3.76137	3.61313	2.98761	3.68725	0.699645
580	bgm	3.58401	4.07897	4.30142	4.04996	3.83149	4.17569	0.344199
581	BHD	3.25836	3.32742	3.31505	3.57392	3.29289	3.44448	0.151594
582	bi	4.97114	5.3373	4.87572	4.93847	5.15422	4.90709	-0.247131
583	BI-1	6.88138	6.72867	6.91815	6.62586	6.80503	6.77201	-0.033021
584	bib	4.85316	4.85364	4.73549	5.09924	4.8534	4.91737	0.0639694
585	bic	8.98843	8.96642	9.13043	9.41423	8.97742	9.27233	0.294906
586	BicC	4.23887	3.81751	3.76129	3.79838	4.02819	3.77983	-0.248354
587	BicD	6.58171	6.54156	6.49466	6.48046	6.56163	6.48756	-0.0740705
588	Bicra	6.84303	7.10736	6.6103	6.78811	6.9752	6.6992	-0.275991
589	bif	7.33698	7.23052	7.30001	7.41945	7.28375	7.35973	0.0759796
590	BigH1	3.10225	2.54482	3.33792	3.41598	2.82353	3.37695	0.553419
591	bigmax	4.18313	4.4646	4.16478	4.74294	4.32386	4.45386	0.129997
592	Bili	2.85945	2.79678	2.32929	2.27399	2.82812	2.30164	-0.526472
593	bin	1.61653	1.24859	1.01767	1.79205	1.43256	1.40486	-0.0276995
594	Bin1	4.60862	4.60398	4.82797	4.73073	4.6063	4.77935	0.173052
595	bin3	6.18195	6.38778	6.18085	6.286	6.28487	6.23342	-0.0514457
596	bip1	5.53624	5.45894	5.54638	5.38752	5.49759	5.46695	-0.0306376
597	bisc	3.47796	3.61307	3.52291	3.71776	3.54552	3.62033	0.0748181
598	Bka	3.02851	2.9122	3.1058	2.82448	2.97036	2.96514	-0.00521687
599	blanks	4.50643	4.27857	5.43063	5.3412	4.3925	5.38591	0.993413
600	Blimp-1	5.35938	5.40582	5.01577	5.42097	5.3826	5.21837	-0.164225
601	Blm	3.97376	3.87323	3.65684	3.64934	3.9235	3.65309	-0.270404
602	Blos1	3.20802	3.24046	3.31437	3.49934	3.22424	3.40686	0.182614
603	Blos2	3.22588	2.92871	3.31189	2.91834	3.07729	3.11512	0.0378218
604	Blos3	3.13342	2.91901	3.36418	3.34297	3.02621	3.35357	0.327357
605	Blos4	2.55966	2.37581	2.89905	2.35976	2.46773	2.62941	0.161674
606	blot	6.46061	6.69867	6.69216	6.98159	6.57964	6.83687	0.257229
607	blow	5.44824	5.30347	5.27269	5.40886	5.37586	5.34077	-0.0350842
608	blp	3.3789	3.45118	3.48347	3.64164	3.41504	3.56255	0.147513
609	blw	8.52581	8.82358	8.84161	9.11671	8.6747	8.97916	0.304464
610	bma	1.78288	2.18233	1.48954	1.32982	1.98261	1.40968	-0.572926
611	Bmcp	4.241	4.39252	4.55599	4.31	4.31676	4.433	0.116238
612	bmm	5.81607	5.78151	5.88966	5.40929	5.79879	5.64948	-0.149314
613	bnb	8.22769	8.53282	8.53314	9.0055	8.38025	8.76932	0.389064
614	BNIP3	9.79073	9.71099	9.63497	9.22573	9.75086	9.43035	-0.320515
615	bnl	3.60719	3.82979	3.61987	3.47597	3.71849	3.54792	-0.170567
616	boca	4.93489	4.74639	5.15829	5.19704	4.84064	5.17767	0.337029
617	bocks	5.06672	5.15594	5.17183	5.10621	5.11133	5.13902	0.0276974
618	BOD1	5.73961	5.98733	5.70859	6.0416	5.86347	5.8751	0.0116243
619	Boh1	2.10777	2.12115	2.42259	2.28597	2.11446	2.35428	0.239819
620	Boh2	3.44592	3.28028	3.38796	3.37537	3.3631	3.38167	0.0185666
621	boi	5.14675	5.14988	4.96921	5.08182	5.14831	5.02551	-0.1228
622	boil	3.57703	3.35185	3.22356	2.92832	3.46444	3.07594	-0.3885
623	bol	6.89436	6.66053	6.3298	6.15178	6.77744	6.24079	-0.536655
624	boly	4.13276	3.5545	3.83887	3.64541	3.84363	3.74214	-0.101488
625	BomS2	0.478315	1.30029	-0.300067	-0.257912	0.889305	-0.278989	-1.16829
626	BomS3	1.16577	3.10703	0.64798	0.878514	2.1364	0.763247	-1.37315
627	BomS6	2.241	1.89841	1.69148	1.40194	2.0697	1.54671	-0.522998
628	bon	6.15532	6.33522	6.11033	6.09913	6.24527	6.10473	-0.140538
629	bond	4.5229	4.43279	4.4548	4.41279	4.47785	4.43379	-0.0440521
630	bonsai	4.02547	4.05069	4.31239	4.16561	4.03808	4.239	0.200921
631	Boot	1.76957	1.50338	1.76771	1.96884	1.63648	1.86828	0.231798
632	bor	5.49091	5.39355	5.5998	5.89401	5.44223	5.7469	0.304675
633	bora	3.4277	2.8622	3.37892	3.45853	3.14495	3.41872	0.273778
634	BORCS5	3.46657	3.28754	3.50416	3.92612	3.37705	3.71514	0.338085
635	BORCS6	3.27712	3.03455	3.17084	3.66676	3.15584	3.4188	0.262962
636	BORCS7	2.48859	2.49973	2.3909	2.24353	2.49416	2.31722	-0.176943
637	borr	4.552	4.48439	4.70797	4.81718	4.5182	4.76258	0.244377
638	botv	4.77337	4.92378	4.69423	4.67349	4.84858	4.68386	-0.164713
639	bou	4.45178	4.322	4.49052	4.57873	4.38689	4.53462	0.147734
640	bowl	7.14706	7.26578	7.1213	7.08924	7.20642	7.10527	-0.101152
641	BoYb	0.528961	1.11613	0.237884	0.711877	0.822547	0.474881	-0.347666
642	br	10.371	10.6696	10.0758	10.4691	10.5203	10.2725	-0.2478
643	Br140	4.78481	4.96717	4.97728	5.32998	4.87599	5.15363	0.277642
644	brat	8.41644	8.32825	7.9957	7.99692	8.37234	7.99631	-0.376032
645	Brca2	3.90827	3.87067	3.82565	3.45276	3.88947	3.63921	-0.250266
646	Brd	2.60176	2.98535	2.51163	2.45799	2.79356	2.48481	-0.308746
647	Brd7-9	5.29301	5.24049	5.26374	5.19917	5.26675	5.23146	-0.0352942
648	Brd8	4.47555	4.53432	4.7565	5.05018	4.50494	4.90334	0.398402
649	Bre1	5.68014	5.86466	5.59536	5.9803	5.7724	5.78783	0.0154278
650	Brf	4.89237	4.98104	4.93665	5.0518	4.93671	4.99422	0.0575143
651	brk	4.94377	5.05236	4.7578	4.62655	4.99806	4.69217	-0.305893
652	brm	6.92602	7.21583	6.96425	7.12265	7.07093	7.04345	-0.0274778
653	Brms1	4.52396	4.35811	4.57955	4.7137	4.44103	4.64662	0.205592
654	brn	3.22102	2.65077	3.4019	3.00502	2.93589	3.20346	0.267567
655	brp	5.4245	5.6789	4.66339	5.17309	5.5517	4.91824	-0.63346
656	Brr2	6.7137	6.88794	6.58261	6.63724	6.80082	6.60993	-0.190893
657	bru1	6.45201	6.20722	6.08947	6.15859	6.32961	6.12403	-0.205585
658	bru2	5.59547	5.69472	5.30132	5.07746	5.6451	5.18939	-0.455708
659	bru3	5.38824	5.45494	4.97795	4.73361	5.42159	4.85578	-0.565818
660	Bruce	7.68922	8.12309	7.63729	7.54641	7.90616	7.59185	-0.314305
661	brun	5.64841	5.85351	5.71816	5.62762	5.75096	5.67289	-0.0780658
662	brv1	0.787168	0.972512	1.2184	1.11589	0.87984	1.16714	0.287302
663	brv2	0.884595	0.451554	1.20297	1.60555	0.668074	1.40426	0.736187
664	brv3	2.76132	2.51279	2.8289	3.36077	2.63705	3.09484	0.457781
665	BRWD3	6.50623	6.74575	6.43862	6.68443	6.62599	6.56153	-0.0644654
666	brwl	3.97679	4.16228	4.12457	3.82792	4.06953	3.97624	-0.0932892
667	bs	4.38796	4.688	4.35262	4.43252	4.53798	4.39257	-0.14541
668	bsd	6.00825	5.98751	5.84162	6.11223	5.99788	5.97692	-0.0209559
669	bsf	5.59096	5.80404	5.69971	5.76767	5.6975	5.73369	0.0361827
670	Bsg	9.11522	9.13588	9.09375	8.66918	9.12555	8.88147	-0.244085
671	bsh	0.537465	0.763383	0.519259	0.76978	0.650424	0.64452	-0.0059042
672	bsk	5.76339	5.76777	5.67048	5.1354	5.76558	5.40294	-0.36264
673	bt	8.34828	9.17237	8.65771	8.07983	8.76032	8.36877	-0.391554
674	BTBD9	4.69878	4.4617	4.61767	5.00473	4.58024	4.8112	0.230963
675	BtbVII	6.44036	6.58818	6.40158	6.73987	6.51427	6.57072	0.0564502
676	btd	2.11584	2.09374	2.1313	1.8887	2.10479	2.01	-0.0947901
677	BthD	2.50154	2.54759	2.73989	2.4576	2.52457	2.59874	0.0741797
678	Btk	6.26659	6.4526	6.27236	6.21396	6.35959	6.24316	-0.116431
679	btl	3.67097	3.86302	3.5388	3.71311	3.767	3.62596	-0.14104
680	Btnd	3.15817	3.54653	4.63226	4.59055	3.35235	4.6114	1.25906
681	btsz	7.21689	7.35473	7.32466	7.36247	7.28581	7.34357	0.0577541
682	btv	2.19382	2.59681	1.97429	1.89777	2.39532	1.93603	-0.459291
683	btz	5.55428	5.79133	5.50849	6.02876	5.6728	5.76863	0.0958246
684	Bub1	5.17391	5.29229	5.13716	5.40685	5.2331	5.27201	0.0389095
685	Bub3	5.59802	5.67196	5.7297	5.80126	5.63499	5.76548	0.130488
686	BubR1	4.63856	4.73294	4.73372	4.62961	4.68575	4.68167	-0.00408052
687	Buffy	3.2982	2.43138	2.90487	2.9506	2.86479	2.92773	0.0629452
688	bug	3.65083	3.70815	3.97788	3.76552	3.67949	3.8717	0.192211
689	Bug22	4.76359	4.64719	4.85583	4.72284	4.70539	4.78933	0.0839434
690	BuGZ	6.68952	6.80341	6.63425	6.66374	6.74647	6.64899	-0.0974741
691	Bulli	4.11441	4.17972	4.31825	4.06081	4.14707	4.18953	0.0424628
692	bun	9.07242	8.91196	8.73953	8.09228	8.99219	8.4159	-0.576288
693	bur	6.70422	6.80305	6.70073	6.59182	6.75364	6.64628	-0.107364
694	bves	4.70656	4.70799	4.56544	4.16673	4.70728	4.36609	-0.341192
695	bw	5.34988	5.57714	5.85202	6.35965	5.46351	6.10584	0.642327
696	bwa	7.55886	7.17464	7.09819	6.87891	7.36675	6.98855	-0.378206
697	Bx	3.86418	4.11888	3.65744	3.81635	3.99153	3.73689	-0.254638
698	Bx42	5.8347	5.79511	5.85307	6.32067	5.8149	6.08687	0.271971
699	by	5.62923	5.95923	5.68003	5.70897	5.79423	5.6945	-0.0997286
700	byn	2.61791	2.82899	2.4923	2.43687	2.72345	2.46458	-0.258868
701	bys	4.15951	4.20346	4.29563	4.4628	4.18148	4.37922	0.197732
702	c-cup	3.41476	3.37691	3.43217	3.01955	3.39583	3.22586	-0.16997
703	c(3)G	2.82643	2.52228	2.49198	2.21858	2.67436	2.35528	-0.319081
704	c11.1	6.39444	6.64233	6.23945	6.29728	6.51839	6.26836	-0.250022
705	c12.1	4.93114	4.84302	5.07488	5.25364	4.88708	5.16426	0.277182
706	c12.2	3.96991	4.27336	4.92865	5.15449	4.12164	5.04157	0.91993
707	C15	1.38386	1.74124	1.69818	2.17412	1.56255	1.93615	0.373605
708	C1GalTA	5.06604	5.08874	4.87882	4.84395	5.07739	4.86139	-0.216001
709	C3G	5.7999	5.96944	5.6128	5.6678	5.88467	5.6403	-0.244365
710	ca	5.28511	5.63348	5.48672	5.54103	5.45929	5.51387	0.0545783
711	Ca-alpha1D	4.35036	4.41674	4.18981	4.5279	4.38355	4.35886	-0.0246922
712	Ca-alpha1T	3.69612	3.78794	3.18097	3.24576	3.74203	3.21337	-0.528667
713	Ca-beta	3.59502	3.84473	3.28221	3.05014	3.71988	3.16618	-0.553701
714	Ca-Ma2d	4.40505	4.52686	4.01028	4.12923	4.46596	4.06976	-0.396199
715	CaBP1	7.81294	7.72387	7.93715	8.00359	7.76841	7.97037	0.201962
716	cac	4.04733	4.20216	3.49164	3.32271	4.12475	3.40717	-0.717571
717	cact	7.15891	7.01584	6.8635	7.08605	7.08737	6.97478	-0.112598
718	cactin	4.20525	4.3229	4.21645	4.53961	4.26407	4.37803	0.113961
719	cad	5.05922	5.18287	5.09121	5.39796	5.12104	5.24459	0.123543
720	Cad74A	5.43943	5.54105	5.22709	5.25322	5.49024	5.24015	-0.250091
721	Cad86C	4.99432	5.16413	4.66728	4.82404	5.07923	4.74566	-0.333568
722	Cad87A	5.92237	6.18237	5.78149	5.58674	6.05237	5.68412	-0.368251
723	Cad88C	1.54687	1.69244	0.963607	0.80202	1.61966	0.882814	-0.736844
724	Cad96Ca	5.08535	5.0526	4.88839	4.85031	5.06898	4.86935	-0.199628
725	Cad96Cb	2.11688	1.78426	1.43049	1.91309	1.95057	1.67179	-0.278777
726	Cad99C	6.00213	6.25706	6.25373	6.38611	6.12959	6.31992	0.190324
727	CadN	6.66143	6.93744	6.13353	5.98695	6.79943	6.06024	-0.739193
728	CadN2	1.51957	1.743	1.16346	1.05132	1.63129	1.10739	-0.523892
729	Cadps	5.79521	5.94932	5.50796	4.96825	5.87227	5.2381	-0.634165
730	Caf1-105	3.16288	3.51961	3.36272	3.49242	3.34125	3.42757	0.0863252
731	Caf1-180	4.59528	4.93979	4.8296	5.11531	4.76754	4.97246	0.204919
732	Caf1-55	6.22414	6.31352	6.48433	6.52972	6.26883	6.50702	0.238194
733	cag	3.41572	3.11218	3.46599	3.08592	3.26395	3.27595	0.0120061
734	CAH1	7.71792	7.35171	7.44694	7.35342	7.53482	7.40018	-0.134631
735	CAH13	5.57187	5.24579	5.06625	5.00655	5.40883	5.0364	-0.372431
736	CAH14	2.73948	2.6437	3.34253	3.15341	2.69159	3.24797	0.556381
737	CAH15	2.94681	2.30521	2.55673	2.74999	2.62601	2.65336	0.0273494
738	CAH2	5.99981	5.99021	5.66116	5.49609	5.99501	5.57862	-0.416389
739	CAH3	5.81788	5.89274	5.93275	5.91966	5.85531	5.92621	0.0709007
740	CAH4	2.28305	2.18608	1.38717	0.963438	2.23456	1.17531	-1.05926
741	CAH6	0.498479	0.537041	0.166729	-0.602126	0.51776	-0.217698	-0.735458
742	CAH7	4.98387	4.81132	4.57493	4.79429	4.89759	4.68461	-0.212984
743	CAH9	1.53517	2.14502	2.15487	2.57162	1.84009	2.36325	0.523154
744	CAHbeta	1.69778	2.04951	1.87634	1.64677	1.87364	1.76155	-0.112094
745	cal1	5.13899	5.1994	5.07412	5.01002	5.1692	5.04207	-0.127125
746	CalpA	5.3402	5.50452	5.30126	5.33416	5.42236	5.31771	-0.104647
747	CalpB	5.09863	5.29603	4.94156	5.10987	5.19733	5.02572	-0.171612
748	CalpC	4.62126	4.72684	4.72772	4.90314	4.67405	4.81543	0.141382
749	Calr	9.838	9.81584	9.93668	10.1533	9.82692	10.045	0.218071
750	Cals	7.89465	7.96577	7.80719	6.93585	7.93021	7.37152	-0.558688
751	Calx	4.53381	4.49626	4.35586	4.41084	4.51503	4.38335	-0.13168
752	calypso	3.77738	3.74438	3.75034	3.83879	3.76088	3.79456	0.0336814
753	Cam	9.73861	9.84817	9.74516	9.53143	9.79339	9.6383	-0.155092
754	CaMKI	8.03201	8.19681	8.10796	7.65807	8.11441	7.88302	-0.231393
755	CaMKII	7.32463	7.50455	7.31271	6.79259	7.41459	7.05265	-0.361941
756	Camp	4.0551	4.07881	4.13701	4.01796	4.06695	4.07749	0.0105368
757	Camta	5.30044	5.59504	5.24442	5.14858	5.44774	5.1965	-0.251246
758	can	2.5572	2.41569	2.88356	2.70879	2.48645	2.79618	0.309727
759	cana	5.71127	5.85277	5.81619	5.61064	5.78202	5.71342	-0.0686024
760	CanA-14F	6.0261	6.14317	6.61577	6.78917	6.08464	6.70247	0.617833
761	CanA1	3.84856	3.95488	4.07158	4.04851	3.90172	4.06005	0.158327
762	CanB	3.40082	3.27887	3.03479	2.47996	3.33984	2.75737	-0.582469
763	CanB2	6.41331	6.40208	6.37229	6.27844	6.4077	6.32537	-0.0823273
764	Cand1	6.60448	6.61044	6.55512	6.82523	6.60746	6.69018	0.0827147
765	CAP	6.71177	7.08731	6.9162	6.88728	6.89954	6.90174	0.00219917
766	Cap-D2	4.60147	4.93966	4.77893	4.77008	4.77057	4.7745	0.00393786
767	Cap-D3	3.67735	3.86551	3.58693	3.58512	3.77143	3.58602	-0.185407
768	Cap-G	5.75413	5.83376	5.45744	5.61383	5.79395	5.53564	-0.25831
769	Cap-H2	4.46746	4.6747	4.27747	3.959	4.57108	4.11824	-0.452848
770	Capa	1.70776	1.69107	1.69238	1.25399	1.69942	1.47318	-0.226234
771	Caper	6.77315	6.80602	6.69344	6.9978	6.78959	6.84562	0.0560333
772	Capr	8.08005	8.19709	8.13365	8.31047	8.13857	8.22206	0.0834919
773	caps	6.87737	6.93372	6.74398	6.63893	6.90554	6.69145	-0.214089
774	capt	8.0088	8.05893	8.08767	8.4522	8.03386	8.26994	0.236072
775	capu	6.43516	6.53005	6.30013	6.43997	6.48261	6.37005	-0.112561
776	car	4.39052	4.4456	4.40065	4.51437	4.41806	4.45751	0.0394516
777	CARPA	2.26953	2.12068	1.56764	1.18481	2.19511	1.37623	-0.818879
778	CARPB	3.7885	5.09758	5.97618	6.13829	4.44304	6.05723	1.61419
779	CarT	0.189982	0.0612724	0.175622	-0.452361	0.125627	-0.138369	-0.263996
780	cas	3.04232	2.97074	2.86116	2.97565	3.00653	2.9184	-0.088125
781	CASK	6.56498	6.66746	6.36746	6.33548	6.61622	6.35147	-0.264752
782	casp	6.97291	6.89179	6.76383	6.72978	6.93235	6.7468	-0.185547
783	cass	7.52661	7.58432	7.34813	7.25201	7.55546	7.30007	-0.255393
784	Cat	9.12645	9.02751	9.1405	9.34828	9.07698	9.24439	0.167413
785	cathD	10.6872	10.4339	10.6507	10.9287	10.5606	10.7897	0.229104
786	Catsup	6.61277	6.71669	6.85215	6.82001	6.66473	6.83608	0.17135
787	caup	4.57824	4.54389	4.48037	4.63878	4.56106	4.55958	-0.00148633
788	cav	3.39969	3.33063	3.57347	3.15447	3.36516	3.36397	-0.00119482
789	caz	6.81347	7.0273	6.90492	7.19377	6.92038	7.04934	0.12896
790	cbc	3.50685	3.64601	3.69568	3.92277	3.57643	3.80922	0.232793
791	Cbl	5.95801	6.02394	5.88591	5.77773	5.99098	5.83182	-0.159155
792	CBP	6.78549	6.72954	6.74416	6.41455	6.75751	6.57935	-0.178163
793	Cbp20	4.34911	4.13909	4.58691	4.63491	4.2441	4.61091	0.366811
794	Cbp53E	3.86837	4.18858	3.98439	3.4998	4.02847	3.7421	-0.286376
795	Cbp80	5.93327	6.11456	5.93431	6.0759	6.02392	6.00511	-0.0188089
796	cbs	4.92705	4.98717	5.0782	5.08836	4.95711	5.08328	0.126168
797	Cbs	4.90022	4.83538	5.32933	5.54458	4.8678	5.43696	0.569159
798	cbt	6.46781	6.97288	6.65098	6.9363	6.72035	6.79364	0.0732939
799	Cby	0.975594	0.983498	0.967615	1.03803	0.979546	1.00282	0.0232744
800	Cc2d2a	1.80914	2.05749	2.535	2.90511	1.93332	2.72005	0.786733
801	CCAP	0.993386	0.794055	0.947118	0.375564	0.89372	0.661341	-0.232379
802	ccb	3.82585	3.53298	3.69072	3.15993	3.67941	3.42532	-0.254089
803	CCDC53	2.7177	2.44811	2.89584	3.27557	2.58291	3.08571	0.502802
804	Ccdc56	4.77738	4.62655	4.99671	5.13736	4.70196	5.06704	0.365072
805	Ccdc58	3.95432	3.90501	3.91574	4.02243	3.92967	3.96909	0.0394195
806	Ccdc85	4.03469	3.99113	3.83255	4.01689	4.01291	3.92472	-0.0881967
807	CCHa1	1.2026	1.45191	1.08355	1.08185	1.32726	1.0827	-0.244556
808	CCHa1-R	0.900553	0.84006	0.432283	0.342078	0.870306	0.387181	-0.483126
809	CCHa2	5.65852	5.86834	5.99606	5.68035	5.76343	5.83821	0.0747738
810	CCHa2-R	0.610113	0.586499	0.673313	0.542829	0.598306	0.608071	0.00976497
811	Cchl	4.91576	5.0729	5.16088	5.3463	4.99433	5.25359	0.259259
812	CCKLR-17D3	1.78869	1.88196	1.69623	1.62958	1.83532	1.6629	-0.172421
813	Ccm3	5.87561	5.81627	6.04676	5.73127	5.84594	5.88901	0.0430724
814	Ccn	1.87377	1.78354	1.27949	1.36065	1.82865	1.32007	-0.508586
815	Ccs	3.71785	3.83089	4.05948	4.14782	3.77437	4.10365	0.329281
816	CCT1	7.18854	7.15636	7.32195	7.4707	7.17245	7.39633	0.223873
817	CCT2	7.4042	7.40275	7.55151	7.78197	7.40348	7.66674	0.263263
818	CCT3	7.30913	7.31462	7.47598	7.80696	7.31187	7.64147	0.329596
819	CCT4	7.31665	7.28226	7.44149	7.6007	7.29946	7.52109	0.221635
820	CCT5	7.69799	7.66611	7.88422	8.13861	7.68205	8.01141	0.329367
821	CCT6	7.0135	7.27616	7.33588	7.50044	7.14483	7.41816	0.273329
822	CCT7	7.3191	7.40135	7.39215	7.49237	7.36023	7.44226	0.0820299
823	CCT8	7.15245	7.21761	7.39511	7.58868	7.18503	7.4919	0.306865
824	CCY	2.17162	2.0623	1.5796	1.02872	2.11696	1.30416	-0.812794
825	Ccz1	3.90436	3.82217	4.08427	4.09556	3.86326	4.08991	0.226652
826	CD98hc	7.94918	7.81707	7.86189	7.86094	7.88312	7.86141	-0.0217064
827	Cda4	4.70674	5.14699	5.19059	5.2569	4.92687	5.22374	0.296877
828	Cda5	4.20162	4.88955	4.73762	4.64714	4.54558	4.69238	0.146795
829	Cda9	5.98481	6.34056	5.99544	5.73006	6.16268	5.86275	-0.299935
830	CDase	4.92944	5.19966	4.82288	5.09944	5.06455	4.96116	-0.103387
831	cdc14	5.81189	5.74451	5.71778	5.57314	5.7782	5.64546	-0.132735
832	Cdc16	4.23491	4.3175	4.17835	4.07238	4.2762	4.12537	-0.150836
833	Cdc23	4.29992	4.10394	4.39565	4.76484	4.20193	4.58025	0.378318
834	Cdc27	5.8531	5.81688	5.83735	6.00435	5.83499	5.92085	0.0858622
835	Cdc2rk	3.29659	3.25795	3.51151	3.34684	3.27727	3.42917	0.151902
836	Cdc37	6.54593	6.49942	6.54263	6.94304	6.52268	6.74283	0.220157
837	Cdc42	8.03927	8.19857	8.05161	8.12062	8.11892	8.08611	-0.0328057
838	Cdc45	3.64229	3.9736	3.9376	3.95691	3.80794	3.94726	0.139313
839	Cdc5	5.223	5.33194	5.2836	5.50776	5.27747	5.39568	0.118205
840	CDC50	6.09499	6.13682	6.13221	6.37786	6.11591	6.25503	0.139125
841	Cdc6	3.33914	3.54962	3.62967	3.79195	3.44438	3.71081	0.26643
842	Cdc7	5.61039	5.40188	5.362	5.16163	5.50614	5.26182	-0.244318
843	Cdep	7.26564	7.38014	7.10304	6.98521	7.32289	7.04413	-0.278763
844	CdGAPr	6.05549	6.25475	6.09148	6.04443	6.15512	6.06795	-0.0871656
845	cdi	7.08457	7.0263	6.84131	6.8549	7.05543	6.84811	-0.207329
846	cDIP	1.49642	2.58439	3.36568	3.41272	2.04041	3.3892	1.34879
847	Cdk1	5.00248	4.95306	5.1709	4.80753	4.97777	4.98921	0.011442
848	Cdk12	6.22687	6.2715	6.1161	6.33713	6.24918	6.22662	-0.0225649
849	Cdk2	3.92502	4.16499	3.92085	3.84595	4.045	3.8834	-0.161601
850	CDK2AP1	4.73785	4.87127	4.71116	4.61333	4.80456	4.66225	-0.14231
851	Cdk4	4.50978	4.66749	4.62762	4.48748	4.58864	4.55755	-0.0310891
852	Cdk5	4.64794	4.54542	4.72221	4.70109	4.59668	4.71165	0.114967
853	Cdk5alpha	3.96286	3.80833	3.51224	3.51204	3.88559	3.51214	-0.373458
854	Cdk7	3.87417	3.97453	4.11084	3.94177	3.92435	4.0263	0.101952
855	Cdk8	3.09571	2.95414	3.11312	3.0273	3.02493	3.07021	0.0452868
856	Cdk9	4.30083	4.16532	4.44034	4.69884	4.23307	4.56959	0.336517
857	Cdlc2	3.80417	3.68845	3.67525	3.86504	3.74631	3.77014	0.0238359
858	cdm	5.7003	5.86492	5.76196	5.69751	5.78261	5.72974	-0.0528771
859	Cds	6.17617	6.23843	6.14351	5.97295	6.2073	6.05823	-0.149069
860	CecA1	0.357978	0.026851	0.677608	-1.19597	0.192415	-0.259183	-0.451597
861	Ced-12	5.05238	5.08264	4.90079	4.80799	5.06751	4.85439	-0.21312
862	ced-6	8.43338	8.47091	8.50587	8.50507	8.45215	8.50547	0.0533246
863	Cen	5.57606	5.65204	5.43431	5.33087	5.61405	5.38259	-0.231458
864	CenB1A	5.53823	5.3122	5.2375	5.43358	5.42521	5.33554	-0.0896689
865	CenG1A	5.9447	6.06031	5.76354	5.89808	6.00251	5.83081	-0.171695
866	Cenp-C	4.76519	4.95137	4.69968	4.63785	4.85828	4.66876	-0.189519
867	Cep135	4.8377	4.95754	4.83864	5.08398	4.89762	4.96131	0.0636903
868	Cep290	3.93557	3.50536	3.99608	4.254	3.72046	4.12504	0.404579
869	Cep89	0.496377	0.786234	1.34519	1.38546	0.641305	1.36533	0.72402
870	Cep97	5.01716	4.58018	4.64023	4.60142	4.79867	4.62082	-0.177845
871	cer	9.16542	8.65078	9.47992	9.4655	8.9081	9.47271	0.564606
872	Cerk	6.56625	6.31691	6.31333	6.44825	6.44158	6.38079	-0.0607879
873	cert	6.28273	6.10078	6.16284	6.20965	6.19176	6.18624	-0.00551518
874	cerv	2.84474	2.84277	2.90429	2.5561	2.84375	2.73019	-0.113559
875	Cf2	6.26564	6.38744	6.26451	6.20833	6.32654	6.23642	-0.0901218
876	Cfp1	3.3372	3.31037	3.42344	3.50004	3.32379	3.46174	0.137952
877	Cftr	6.28274	6.5595	6.45984	6.57229	6.42112	6.51607	0.0949424
878	cg	6.95885	7.02438	6.81923	6.85557	6.99161	6.8374	-0.15421
879	CG10005	4.06025	3.68926	4.07463	3.59013	3.87475	3.83238	-0.0423718
880	CG10011	5.80509	6.06882	5.77139	5.72398	5.93696	5.74768	-0.189274
881	CG10013	1.77506	1.51683	2.15871	2.37909	1.64594	2.2689	0.622957
882	CG10019	4.42934	4.45718	4.30322	4.16687	4.44326	4.23505	-0.208214
883	CG10026	4.91343	5.32465	5.12376	5.31315	5.11904	5.21845	0.0994137
884	CG10031	1.27622	2.23408	2.46098	1.66886	1.75515	2.06492	0.309775
885	CG10038	4.51443	4.43604	4.70741	4.41828	4.47524	4.56285	0.0876135
886	CG10051	5.00702	5.90313	5.69123	5.70765	5.45507	5.69944	0.244369
887	CG10053	3.26295	2.99833	3.34692	3.43561	3.13064	3.39127	0.260623
888	CG10055	5.3141	5.14319	5.18432	5.26719	5.22865	5.22575	-0.00289163
889	CG10062	3.79928	3.78473	3.47127	3.18017	3.79201	3.32572	-0.466285
890	CG10063	3.62424	3.22661	3.94768	4.21767	3.42543	4.08267	0.657245
891	CG10064	4.57543	4.17934	4.07327	4.1104	4.37739	4.09184	-0.285552
892	CG10068	4.26682	4.2097	4.41529	4.04123	4.23826	4.22826	-0.00999899
893	CG10073	-2.03067	0.631563	2.26867	1.09311	-0.699554	1.68089	2.38045
894	CG10075	3.26632	3.10725	3.28273	3.4058	3.18679	3.34427	0.15748
895	CG10077	8.90251	9.05903	8.72596	8.72572	8.98077	8.72584	-0.254929
896	CG10086	4.03964	4.29128	3.87779	4.05784	4.16546	3.96782	-0.197644
897	CG10089	4.72297	4.08384	3.92389	4.08861	4.40341	4.00625	-0.397156
898	CG10097	0.601588	0.982169	-0.950136	-0.268383	0.791879	-0.60926	-1.40114
899	CG10098	6.07653	5.87021	6.11433	6.22276	5.97337	6.16855	0.195178
900	CG10104	2.13015	1.93698	1.80246	1.97666	2.03357	1.88956	-0.144005
901	CG10116	3.05088	3.20831	3.76004	3.73399	3.12959	3.74701	0.617421
902	CG10126	6.38576	6.47892	6.7169	6.65457	6.43234	6.68574	0.253395
903	CG10132	3.93799	4.1429	3.43917	3.8801	4.04045	3.65963	-0.380812
904	CG10137	2.69773	2.93559	2.44972	2.6317	2.81666	2.54071	-0.275952
905	CG10139	4.01017	3.98528	4.17489	4.23709	3.99772	4.20599	0.208263
906	CG10140	3.98747	4.29418	3.79782	3.4088	4.14082	3.60331	-0.537512
907	CG10147	2.76812	2.85253	2.81631	2.71793	2.81032	2.76712	-0.0432069
908	CG10151	3.26611	3.27306	3.49833	3.89706	3.26959	3.6977	0.428109
909	CG10154	2.40462	3.47459	2.54813	0.933102	2.9396	1.74061	-1.19899
910	CG10164	5.02605	4.69485	4.40616	3.96888	4.86045	4.18752	-0.672934
911	CG10165	2.00226	2.31206	2.23196	2.06543	2.15716	2.1487	-0.00846336
912	CG10171	5.10794	4.89208	4.88501	4.97894	5.00001	4.93198	-0.0680325
913	CG10175	2.22645	2.43816	2.64814	1.98753	2.33231	2.31784	-0.0144701
914	CG10177	4.16553	3.93754	3.76047	3.41972	4.05154	3.59009	-0.461444
915	CG10182	5.93478	5.99251	6.92638	5.79599	5.96364	6.36118	0.39754
916	CG10184	2.8982	2.7947	3.53585	3.03754	2.84645	3.2867	0.44025
917	CG10189	3.14141	3.15993	3.42013	3.5395	3.15067	3.47981	0.329142
918	CG10194	3.43529	3.51081	3.63942	3.51307	3.47305	3.57624	0.103192
919	CG10195	3.90951	3.91428	4.06591	3.66014	3.9119	3.86303	-0.0488687
920	CG10205	3.4063	3.69185	3.41868	3.88153	3.54908	3.65011	0.101027
921	CG10208	3.27177	2.93367	2.66204	2.86352	3.10272	2.76278	-0.33994
922	CG10209	4.04546	3.79574	3.77732	4.13781	3.9206	3.95757	0.036967
923	CG10211	5.79108	6.34936	6.20395	6.38361	6.07022	6.29378	0.22356
924	CG10214	4.11872	4.14312	4.41969	3.96637	4.13092	4.19303	0.0621116
925	CG10222	2.90211	2.55753	3.178	2.97469	2.72982	3.07635	0.346527
926	CG10226	0.451606	1.14739	0.583918	0.732847	0.7995	0.658382	-0.141118
927	CG10232	1.19657	-0.104532	1.11333	1.29672	0.546018	1.20503	0.659008
928	CG10237	4.61978	5.64216	5.69995	6.30542	5.13097	6.00268	0.871716
929	CG1024	3.71732	3.88155	3.73311	3.98802	3.79943	3.86056	0.0611334
930	CG10252	6.39531	5.86418	5.90027	5.62828	6.12974	5.76427	-0.36547
931	CG10254	6.52872	6.30834	6.39562	6.27399	6.41853	6.3348	-0.0837265
932	CG10265	3.42973	3.16604	3.35174	3.42627	3.29788	3.38901	0.0911235
933	CG10274	4.04806	4.2375	4.12106	4.18394	4.14278	4.1525	0.00972157
934	CG10283	4.02673	4.15098	4.03234	4.05601	4.08886	4.04417	-0.0446816
935	CG10286	4.75424	4.77385	4.95208	4.7597	4.76405	4.85589	0.0918467
936	CG10298	3.1946	2.73593	2.90974	2.88128	2.96527	2.89551	-0.0697623
937	CG10300	3.3468	3.38858	4.12553	4.21279	3.36769	4.16916	0.801472
938	CG10307	2.86842	2.18377	2.05446	1.92014	2.52609	1.9873	-0.538793
939	CG10311	4.84829	5.13969	5.19296	4.89092	4.99399	5.04194	0.0479539
940	CG10317	3.82517	3.48239	3.50221	2.7984	3.65378	3.1503	-0.50348
941	CG10321	5.50124	5.59367	5.6077	5.79646	5.54745	5.70208	0.154625
942	CG10324	3.15269	3.15342	3.1686	3.14715	3.15305	3.15787	0.00482106
943	CG10332	0.780804	1.08396	0.66167	0.446508	0.93238	0.554089	-0.378291
944	CG10333	4.86423	4.94256	4.9767	5.03198	4.9034	5.00434	0.100944
945	CG10336	2.07465	2.37037	2.57111	2.64509	2.22251	2.6081	0.385587
946	CG10337	3.617	3.01399	3.39213	2.59451	3.31549	2.99332	-0.322179
947	CG10338	4.1352	4.06289	4.19884	4.12208	4.09905	4.16046	0.0614181
948	CG10340	4.57716	4.48279	4.77203	4.86183	4.52998	4.81693	0.286954
949	CG10341	4.11805	4.08099	3.94566	3.96301	4.09952	3.95433	-0.145183
950	CG10343	4.2878	4.08251	4.3443	4.20624	4.18516	4.27527	0.0901155
951	CG10344	3.03489	2.84649	2.61982	2.18938	2.94069	2.4046	-0.536088
952	CG10345	0.631015	0.631704	0.338616	0.974869	0.631359	0.656742	0.0253829
953	CG10347	4.70767	4.70263	4.72842	4.59336	4.70515	4.66089	-0.0442557
954	CG10348	1.80831	1.63096	1.75985	2.41542	1.71964	2.08764	0.367999
955	CG10353	6.82266	7.04853	6.20963	6.21679	6.93559	6.21321	-0.722385
956	CG10359	6.21691	6.00878	6.17553	5.96778	6.11284	6.07166	-0.0411843
957	CG10362	1.83081	2.42432	1.90189	1.55658	2.12757	1.72923	-0.398333
958	CG10365	6.99529	6.80686	7.05115	7.27438	6.90107	7.16276	0.26169
959	CG10366	4.05766	4.09523	4.20452	4.3875	4.07644	4.29601	0.219568
960	CG10375	4.73923	4.46898	4.83629	4.77418	4.60411	4.80523	0.201123
961	CG10376	4.2959	4.39763	4.20534	4.27892	4.34676	4.24213	-0.104636
962	CG10383	4.72662	4.40159	4.66919	4.70304	4.5641	4.68612	0.122011
963	CG10384	1.04816	1.24661	0.680075	1.15042	1.14738	0.91525	-0.232132
964	CG10395	3.94737	4.06803	4.02761	3.30843	4.0077	3.66802	-0.339676
965	CG10405	3.51142	3.79495	3.63843	3.42423	3.65319	3.53133	-0.121856
966	CG10407	1.82626	1.71349	1.58406	1.67846	1.76987	1.63126	-0.138614
967	CG10413	7.55443	7.30599	7.29934	6.93689	7.43021	7.11811	-0.312102
968	CG10417	6.71499	6.81422	6.75087	6.31677	6.7646	6.53382	-0.230782
969	CG10418	3.32945	3.36099	3.80029	3.86238	3.34522	3.83133	0.486118
970	CG10425	5.1967	5.23744	5.49747	5.62383	5.21707	5.56065	0.343582
971	CG10428	4.26545	4.27837	4.43673	4.32292	4.27191	4.37982	0.107912
972	CG10431	2.22198	2.2337	2.35218	2.16419	2.22784	2.25819	0.030347
973	CG10433	4.51536	4.91822	4.33681	4.70826	4.71679	4.52253	-0.19426
974	CG10435	5.17876	5.06421	5.19024	5.37456	5.12149	5.2824	0.160913
975	CG10444	6.54594	6.41135	6.38398	6.35747	6.47865	6.37072	-0.107923
976	CG10445	2.07579	2.31681	2.22139	1.91332	2.1963	2.06735	-0.128949
977	CG10459	3.00453	2.38299	3.19176	2.97442	2.69376	3.08309	0.389331
978	CG10462	4.99716	5.16787	4.84149	4.57517	5.08252	4.70833	-0.374186
979	CG10463	2.68279	2.8624	3.0899	2.93887	2.7726	3.01439	0.241789
980	CG10465	6.18083	6.08175	6.19077	5.58656	6.13129	5.88867	-0.242626
981	CG10466	2.88336	2.98362	2.90589	2.9574	2.93349	2.93165	-0.00184597
982	CG10467	6.07943	6.43715	6.51257	6.95142	6.25829	6.73199	0.473706
983	CG10469	2.53936	2.58271	2.59854	2.40419	2.56103	2.50137	-0.0596666
984	CG10470	4.9079	4.58678	5.00789	4.79472	4.74734	4.90131	0.153966
985	CG10472	7.27016	7.8879	8.22001	7.97425	7.57903	8.09713	0.518104
986	CG10479	1.61896	1.38961	1.41805	0.670039	1.50428	1.04404	-0.460239
987	CG10483	2.75938	2.95439	3.03583	3.08995	2.85689	3.06289	0.206007
988	CG10486	0.965288	0.577523	1.14813	1.00955	0.771405	1.07884	0.307435
989	CG10492	5.6558	5.75979	5.60611	6.03427	5.70779	5.82019	0.112396
990	CG10494	2.0419	2.56085	2.39784	2.47983	2.30138	2.43883	0.137455
991	CG10495	2.4341	2.09751	2.36546	2.33615	2.26581	2.3508	0.0849981
992	CG10505	5.26944	5.9835	6.06709	5.70993	5.62647	5.88851	0.262038
993	CG10508	3.66061	3.49066	2.79239	2.93169	3.57564	2.86204	-0.713599
994	CG10510	4.04616	3.58485	3.53172	3.72495	3.81551	3.62833	-0.187177
995	CG10512	5.1597	5.7131	5.79876	5.93007	5.4364	5.86441	0.428017
996	CG10513	5.98149	6.63848	6.94768	6.92528	6.30999	6.93648	0.626494
997	CG10514	6.78887	6.831	7.15545	6.888	6.80993	7.02172	0.211788
998	CG10516	5.30418	4.67709	5.66583	5.71831	4.99064	5.69207	0.701433
999	CG10527	8.02291	8.16096	8.53596	8.85795	8.09193	8.69696	0.605027
1000	CG10543	5.41004	5.64306	5.39707	5.56042	5.52655	5.47874	-0.0478079
1001	CG10550	4.04809	4.29335	4.30019	3.83584	4.17072	4.06802	-0.1027
1002	CG10555	6.00499	6.26538	5.9532	6.21911	6.13518	6.08615	-0.0490305
1003	CG10559	1.76101	1.87085	1.83106	1.55634	1.81593	1.6937	-0.12223
1004	CG10560	0.218817	0.697512	2.18368	-0.163342	0.458165	1.01017	0.552007
1005	CG10561	3.97269	3.70328	3.72287	3.62364	3.83798	3.67325	-0.164731
1006	CG10565	6.21652	6.27634	6.31581	6.59438	6.24643	6.45509	0.208662
1007	CG10570	9.19304	9.14338	9.40602	9.1563	9.16821	9.28116	0.112955
1008	CG10576	7.98095	7.97688	8.24405	8.32045	7.97891	8.28225	0.30334
1009	CG10581	1.21066	0.828408	1.02919	1.00548	1.01953	1.01733	-0.00219896
1010	CG10584	2.34846	2.48538	2.13374	2.14696	2.41692	2.14035	-0.276572
1011	CG10588	2.73761	2.46898	1.76507	1.35678	2.60329	1.56092	-1.04237
1012	CG10589	4.26467	3.7397	3.72115	3.43142	4.00218	3.57628	-0.425901
1013	CG10600	6.41653	6.32203	6.25168	6.2533	6.36928	6.25249	-0.116791
1014	CG10602	6.99982	7.19062	7.17768	7.20849	7.09522	7.19308	0.0978633
1015	CG10616	5.98554	5.81852	5.95906	5.97604	5.90203	5.96755	0.0655216
1016	CG10621	5.63205	6.25501	6.25601	6.42624	5.94353	6.34113	0.397596
1017	CG10623	6.78343	6.96436	7.16191	7.45303	6.87389	7.30747	0.433575
1018	CG10628	2.89176	2.97071	3.02605	3.23031	2.93124	3.12818	0.196943
1019	CG10631	5.80419	6.04215	5.73023	5.88823	5.92317	5.80923	-0.113935
1020	CG10638	5.91446	5.85336	6.35543	6.12192	5.88391	6.23867	0.354762
1021	CG10646	3.20638	3.16022	3.37817	3.38429	3.1833	3.38123	0.197932
1022	CG10650	7.43776	7.65717	7.77432	7.66337	7.54746	7.71885	0.171383
1023	CG10654	1.76262	1.34473	1.20795	1.37167	1.55368	1.28981	-0.263865
1024	CG10657	3.19312	3.41882	3.31538	3.34363	3.30597	3.3295	0.02353
1025	CG10660	4.58266	4.3827	4.29669	4.25484	4.48268	4.27576	-0.206917
1026	CG10663	2.67455	2.36208	2.25793	2.46233	2.51832	2.36013	-0.158189
1027	CG10669	3.10605	3.05987	2.97938	3.11449	3.08296	3.04694	-0.0360218
1028	CG10674	3.88431	3.83862	4.07686	4.03076	3.86146	4.05381	0.192346
1029	CG10681	3.22234	3.01061	3.2701	3.29354	3.11647	3.28182	0.165347
1030	CG10694	2.47432	2.30666	2.36385	2.50774	2.39049	2.4358	0.0453077
1031	CG10702	2.46358	2.58167	2.00642	2.09415	2.52262	2.05029	-0.472335
1032	CG10713	3.87817	2.92802	2.80343	2.81991	3.4031	2.81167	-0.591428
1033	CG10725	6.19833	6.80742	6.1812	5.49748	6.50287	5.83934	-0.663537
1034	CG10730	3.3599	3.07186	2.6668	2.67297	3.21588	2.66988	-0.545995
1035	CG10731	3.51069	3.30958	3.57728	3.66691	3.41014	3.62209	0.211955
1036	CG10734	6.20761	5.85737	5.40069	4.6705	6.03249	5.0356	-0.996895
1037	CG10737	6.71984	7.08528	6.83714	7.19867	6.90256	7.0179	0.115348
1038	CG10738	1.33737	0.840043	1.44773	1.07823	1.08871	1.26298	0.174273
1039	CG1074	3.47045	3.41818	3.7104	3.61157	3.44431	3.66098	0.216672
1040	CG10747	3.7662	3.82657	3.60436	3.62161	3.79639	3.61299	-0.183399
1041	CG10748	2.92644	2.65275	3.08686	3.39849	2.7896	3.24268	0.453082
1042	CG10749	3.35307	2.83821	2.70547	2.34961	3.09564	2.52754	-0.568102
1043	CG10750	3.27089	2.66042	2.80002	2.96191	2.96566	2.88096	-0.0846924
1044	CG10752	3.19788	2.6093	2.10238	1.56175	2.90359	1.83206	-1.07153
1045	CG10761	2.45348	1.50147	2.15266	2.29498	1.97747	2.22382	0.246345
1046	CG10764	4.44273	4.21619	4.63173	4.27648	4.32946	4.45411	0.124648
1047	CG10793	2.37524	2.29179	2.35295	2.42385	2.33352	2.3884	0.0548847
1048	CG10799	4.37689	4.88112	4.73759	4.91623	4.629	4.82691	0.197907
1049	CG10801	1.96949	1.58453	1.48897	1.31481	1.77701	1.40189	-0.375116
1050	CG10802	3.95831	3.90427	3.86245	4.10419	3.93129	3.98332	0.052029
1051	CG10803	5.72694	5.83303	5.64918	5.6032	5.77998	5.62619	-0.153791
1052	CG10804	1.22642	1.70355	1.00129	0.595688	1.46498	0.798491	-0.666493
1053	CG10809	4.83644	4.73747	4.75656	4.92819	4.78696	4.84237	0.055417
1054	CG10822	2.8282	2.11169	2.49962	2.07546	2.46994	2.28754	-0.182401
1055	CG10834	0.689876	1.16412	0.450076	-0.747184	0.927	-0.148554	-1.07555
1056	CG10839	2.03902	2.10964	2.02122	1.26447	2.07433	1.64285	-0.431485
1057	CG10841	5.11561	4.78965	4.64554	4.64745	4.95263	4.64649	-0.306137
1058	CG10845	3.7602	3.12428	2.97674	2.50523	3.44224	2.74099	-0.701257
1059	CG10859	5.5449	5.45543	5.08582	5.27205	5.50017	5.17893	-0.321232
1060	CG10862	4.28143	3.90617	4.12845	3.99262	4.0938	4.06054	-0.0332672
1061	CG10863	5.80207	6.01448	6.18766	6.29845	5.90827	6.24305	0.334781
1062	CG10866	2.99609	3.0466	3.14122	3.21203	3.02134	3.17662	0.155283
1063	CG10874	5.29571	5.18503	5.49884	5.61561	5.24037	5.55723	0.316857
1064	CG10877	4.19031	4.26919	4.44376	4.53769	4.22975	4.49072	0.260974
1065	CG10887	3.09942	2.90888	3.66578	3.5933	3.00415	3.62954	0.625386
1066	CG10898	3.91328	4.08961	4.17297	4.16423	4.00144	4.1686	0.167156
1067	CG1090	1.75921	1.99116	1.32286	1.44624	1.87518	1.38455	-0.490631
1068	CG10903	3.55888	3.56167	3.77433	3.74036	3.56027	3.75735	0.197071
1069	CG10904	3.58426	3.54228	3.68158	3.73788	3.56327	3.70973	0.146464
1070	CG10907	3.98352	3.88383	3.89293	3.84445	3.93367	3.86869	-0.0649858
1071	CG10909	1.84997	1.58747	1.77886	1.24412	1.71872	1.51149	-0.20723
1072	CG10910	7.5124	8.66714	7.90407	7.39071	8.08977	7.64739	-0.442376
1073	CG10911	4.49997	4.93077	5.33761	4.6308	4.71537	4.9842	0.268832
1074	CG10912	9.23133	9.00051	9.10746	8.68976	9.11592	8.89861	-0.217305
1075	CG10914	2.91627	2.96753	3.32131	3.35982	2.9419	3.34057	0.398665
1076	CG10916	4.75331	4.77661	4.82014	4.87195	4.76496	4.84605	0.0810848
1077	CG10918	3.32152	4.38059	3.84611	4.44204	3.85106	4.14407	0.293019
1078	CG10919	3.80502	3.36457	3.30826	3.24582	3.58479	3.27704	-0.307755
1079	CG1092	4.36769	4.67486	4.34299	4.32328	4.52128	4.33313	-0.188145
1080	CG10920	3.53317	2.98725	3.34246	3.20934	3.26021	3.2759	0.0156872
1081	CG10927	1.0838	1.29424	1.02777	1.43132	1.18902	1.22954	0.0405223
1082	CG10931	2.64536	2.87245	2.79247	2.9006	2.75891	2.84653	0.0876288
1083	CG10934	4.35682	3.94373	3.65864	3.76492	4.15028	3.71178	-0.438496
1084	CG10936	6.36576	6.29383	6.47407	6.2872	6.3298	6.38064	0.0508391
1085	CG10939	6.68924	6.69181	6.64187	6.53552	6.69053	6.58869	-0.101833
1086	CG10943	3.50479	3.88986	3.85569	2.6423	3.69733	3.24899	-0.448332
1087	CG10947	4.28536	3.63979	3.70478	3.38734	3.96257	3.54606	-0.416512
1088	CG10948	5.25651	5.37812	5.10596	5.16062	5.31731	5.13329	-0.184027
1089	CG10949	3.11644	3.07688	3.3247	3.35806	3.09666	3.34138	0.244722
1090	CG10950	4.07622	3.6883	3.52632	2.95113	3.88226	3.23872	-0.643537
1091	CG10958	4.13991	4.05586	4.08092	4.25246	4.09789	4.16669	0.0688033
1092	CG10959	2.40412	2.21821	2.62092	2.6019	2.31116	2.61141	0.300247
1093	CG10962	5.07552	5.09269	5.71598	5.96385	5.08411	5.83992	0.75581
1094	CG10969	2.75168	2.54125	2.52848	2.18904	2.64647	2.35876	-0.287705
1095	CG10970	0.939345	0.869409	0.243884	0.663751	0.904377	0.453817	-0.450559
1096	CG10973	4.09535	3.78419	4.0703	3.57133	3.93977	3.82082	-0.118956
1097	CG10979	5.19875	5.16284	5.21337	5.15368	5.18079	5.18353	0.00273534
1098	CG10984	5.83624	5.78107	5.86489	5.82151	5.80865	5.8432	0.0345444
1099	CG10993	1.09136	0.359977	1.52885	1.7467	0.725668	1.63777	0.912105
1100	CG10996	1.68472	1.098	1.74869	1.28591	1.39136	1.5173	0.125935
1101	CG11000	1.74288	2.08791	1.91547	1.79687	1.9154	1.85617	-0.0592248
1102	CG11007	4.04595	3.88777	4.34274	4.14637	3.96686	4.24456	0.277695
1103	CG11018	4.1291	3.94515	3.57864	3.14149	4.03713	3.36006	-0.677063
1104	CG11029	2.27314	2.17497	2.61326	3.14644	2.22406	2.87985	0.655794
1105	CG1103	6.54132	6.18792	6.50179	6.27164	6.36462	6.38672	0.0220968
1106	CG11030	4.83922	4.96711	4.85688	5.05092	4.90316	4.9539	0.0507408
1107	CG11034	4.76353	4.10317	5.11469	5.51716	4.43335	5.31592	0.882573
1108	CG11035	2.72	2.7115	2.77822	2.57311	2.71575	2.67567	-0.0400817
1109	CG1105	5.63661	5.68391	6.11065	6.27646	5.66026	6.19356	0.533299
1110	CG11050	4.66962	4.91058	4.8523	4.7579	4.7901	4.8051	0.015005
1111	CG11052	2.07478	2.05604	1.73354	1.98581	2.06541	1.85968	-0.205732
1112	CG11060	3.89567	3.51555	3.63423	3.52087	3.70561	3.57755	-0.12806
1113	CG11068	3.72838	3.51913	3.59461	3.60723	3.62375	3.60092	-0.0228341
1114	CG11069	4.55666	4.65285	4.6374	4.60965	4.60476	4.62353	0.018771
1115	CG11076	5.24017	5.17	5.42913	5.2168	5.20509	5.32296	0.117875
1116	CG11077	3.82567	3.75253	4.16367	3.88066	3.7891	4.02216	0.233064
1117	CG11089	9.99344	9.95087	9.96064	10.2614	9.97216	10.111	0.138854
1118	CG11095	2.3974	2.63703	2.72893	3.01964	2.51721	2.87429	0.357074
1119	CG11106	3.79511	3.58814	3.76898	3.09702	3.69163	3.433	-0.258627
1120	CG11109	4.29524	4.19395	4.36382	4.3704	4.2446	4.36711	0.122512
1121	CG11110	3.21664	2.87871	3.22207	3.44545	3.04768	3.33376	0.28608
1122	CG11122	5.91609	6.33657	6.01499	6.41737	6.12633	6.21618	0.0898471
1123	CG11123	3.76732	4.05678	4.01837	4.22839	3.91205	4.12338	0.211331
1124	CG11125	5.4177	4.97855	5.0654	5.06284	5.19812	5.06412	-0.134008
1125	CG11127	4.71004	4.58795	4.83031	5.01131	4.64899	4.92081	0.271818
1126	CG1113	2.56123	3.19333	3.55055	4.17484	2.87728	3.86269	0.985413
1127	CG11131	2.53788	3.55272	4.12922	4.97043	3.0453	4.54982	1.50452
1128	CG11134	4.83405	4.90107	4.89897	4.85976	4.86756	4.87936	0.0118029
1129	CG11141	5.3519	5.20667	5.38923	5.5197	5.27929	5.45446	0.175174
1130	CG11145	1.91934	1.81201	1.72829	1.29106	1.86568	1.50967	-0.356001
1131	CG11147	2.89047	2.99711	2.78985	2.39653	2.94379	2.59319	-0.3506
1132	CG11149	1.80674	2.41863	2.45594	2.50302	2.11268	2.47948	0.366797
1133	CG11151	6.80581	6.85621	7.70379	8.04164	6.83101	7.87271	1.0417
1134	CG11155	6.2303	6.36277	6.28812	5.52801	6.29653	5.90806	-0.388473
1135	CG11158	1.91325	1.59213	2.4937	2.64089	1.75269	2.5673	0.814604
1136	CG1116	4.18304	4.20799	4.44733	4.35037	4.19552	4.39885	0.203332
1137	CG11162	1.62269	2.34715	2.9018	2.7693	1.98492	2.83555	0.850628
1138	CG11164	2.13401	2.05279	2.11157	2.49266	2.0934	2.30212	0.208715
1139	CG11168	4.75842	4.98749	4.6934	4.79205	4.87295	4.74272	-0.130233
1140	CG11170	3.5654	3.6318	4.08521	4.11722	3.5986	4.10122	0.502622
1141	CG11178	5.14442	5.1751	5.20341	5.41665	5.15976	5.31003	0.15027
1142	CG11180	4.00618	4.17723	4.16888	3.84589	4.09171	4.00739	-0.0843213
1143	CG11191	1.88572	1.50961	1.27681	1.70063	1.69767	1.48872	-0.208946
1144	CG11192	2.57215	1.10074	1.39251	0.898815	1.83645	1.14566	-0.690783
1145	CG11200	4.78331	4.4449	4.51673	4.26345	4.61411	4.39009	-0.224014
1146	CG11226	2.29727	2.07599	2.36041	2.08226	2.18663	2.22134	0.0347104
1147	CG11227	2.39809	1.97318	2.56096	1.94961	2.18563	2.25528	0.0696499
1148	CG1124	4.16174	2.97815	3.77273	2.79909	3.56994	3.28591	-0.284037
1149	CG11241	3.84218	4.10492	4.34749	4.5909	3.97355	4.46919	0.495644
1150	CG11247	5.5167	5.60515	5.43568	5.35931	5.56093	5.3975	-0.16343
1151	CG11248	4.59444	4.54003	4.52445	4.4316	4.56724	4.47802	-0.0892112
1152	CG11249	3.02647	2.90657	2.7785	3.03729	2.96652	2.90789	-0.0586267
1153	CG11251	3.16557	2.8368	2.28723	1.98624	3.00118	2.13674	-0.864445
1154	CG11257	2.61012	2.64968	2.66093	2.54422	2.6299	2.60258	-0.0273176
1155	CG11262	3.634	3.40734	3.25546	3.27017	3.52067	3.26281	-0.257855
1156	CG11267	5.72868	5.63827	5.95901	5.86395	5.68348	5.91148	0.228003
1157	CG11275	6.04266	5.38538	5.87672	6.19339	5.71402	6.03505	0.321037
1158	CG11279	3.3294	3.60443	3.18284	2.86202	3.46692	3.02243	-0.444483
1159	CG11286	1.20327	1.11639	0.0966572	-0.938875	1.15983	-0.421109	-1.58094
1160	CG1129	6.58382	6.21177	6.45594	6.07249	6.39779	6.26421	-0.133579
1161	CG11291	3.21638	2.75129	3.05539	2.63864	2.98383	2.84701	-0.136821
1162	CG11294	3.09436	3.05431	2.88677	3.04497	3.07433	2.96587	-0.108463
1163	CG11298	2.09684	1.49685	1.39679	1.17429	1.79684	1.28554	-0.511303
1164	CG11300	6.39554	7.49081	6.27663	6.77057	6.94318	6.5236	-0.419583
1165	CG11307	3.42639	3.64382	3.36142	3.41266	3.5351	3.38704	-0.148065
1166	CG11309	4.91822	5.14208	5.44727	5.61217	5.03015	5.52972	0.499573
1167	CG11313	3.44465	3.68419	3.68791	3.54309	3.56442	3.6155	0.0510773
1168	CG11317	2.67583	2.5084	1.63566	2.11979	2.59211	1.87772	-0.71439
1169	CG11318	3.76645	3.92451	3.67141	3.64765	3.84548	3.65953	-0.185946
1170	CG11322	3.27885	2.66529	2.38051	2.35227	2.97207	2.36639	-0.605679
1171	CG11327	5.13859	4.9016	5.11888	4.81858	5.0201	4.96873	-0.0513668
1172	CG11333	1.3329	0.905812	0.628206	1.04729	1.11935	0.837747	-0.281607
1173	CG11334	5.76137	5.99873	5.86401	6.06256	5.88005	5.96328	0.0832362
1174	CG11342	2.01723	2.1653	1.7189	1.11951	2.09127	1.41921	-0.672059
1175	CG11345	2.37001	3.50951	3.76712	3.94751	2.93976	3.85732	0.917559
1176	CG11349	5.24544	5.68721	5.42738	5.57014	5.46633	5.49876	0.0324356
1177	CG11350	0.344054	1.51759	-0.182727	1.31083	0.930823	0.564051	-0.366772
1178	CG11353	0.199096	0.614991	0.222165	0.0360909	0.407044	0.129128	-0.277915
1179	CG11357	6.11094	6.12575	6.09388	6.15423	6.11834	6.12405	0.00570673
1180	CG1136	3.24004	3.67132	3.30413	3.41922	3.45568	3.36168	-0.0940029
1181	CG11360	7.03095	7.13399	6.62935	6.20369	7.08247	6.41652	-0.665949
1182	CG11362	2.60055	2.49024	2.66528	1.83243	2.5454	2.24886	-0.296539
1183	CG11367	3.6847	3.70318	3.83367	3.70771	3.69394	3.77069	0.0767461
1184	CG11368	2.24954	2.18366	2.64924	2.09566	2.2166	2.37245	0.155852
1185	CG11369	3.77051	3.48897	3.44098	3.16839	3.62974	3.30468	-0.325053
1186	CG1137	4.38912	4.10933	3.69498	3.35901	4.24922	3.527	-0.722227
1187	CG11370	7.69423	8.09039	8.00607	8.47861	7.89231	8.24234	0.350033
1188	CG11373	2.61286	2.25971	2.23715	1.78399	2.43628	2.01057	-0.425711
1189	CG11374	1.1758	1.68235	0.899042	0.635	1.42907	0.767021	-0.662053
1190	CG11377	4.88114	4.87972	5.07654	4.99656	4.88043	5.03655	0.15612
1191	CG11378	5.04575	5.18232	5.2042	5.09392	5.11404	5.14906	0.0350245
1192	CG11379	1.48766	1.37525	1.65595	1.93129	1.43145	1.79362	0.362165
1193	CG1138	3.19922	2.59445	2.25675	1.64962	2.89683	1.95318	-0.943649
1194	CG11380	1.28149	0.226763	0.0646536	0.182145	0.754129	0.123399	-0.63073
1195	CG11382	3.73227	2.57232	2.52732	2.96421	3.15229	2.74576	-0.406532
1196	CG1139	7.54606	7.59479	7.88555	8.10038	7.57043	7.99296	0.422536
1197	CG11396	4.66009	4.48449	4.50508	4.42031	4.57229	4.4627	-0.109595
1198	CG11398	2.43257	2.28604	2.5047	2.14767	2.35931	2.32619	-0.0331167
1199	CG11403	3.31844	3.31463	3.33769	3.41109	3.31654	3.37439	0.0578576
1200	CG11404	3.23768	3.05606	3.0747	2.50511	3.14687	2.78991	-0.356963
1201	CG11406	-0.523707	0.423116	0.6162	1.25269	-0.0502957	0.934446	0.984742
1202	CG11409	2.22042	2.12649	1.80707	1.8237	2.17345	1.81539	-0.358065
1203	CG11414	5.9153	6.06137	6.08333	6.26192	5.98834	6.17262	0.184289
1204	CG11417	4.12276	4.31022	4.358	4.75839	4.21649	4.5582	0.341704
1205	CG1142	4.43827	4.44472	4.5045	4.22343	4.44149	4.36397	-0.0775265
1206	CG11425	1.34853	1.62199	2.5169	2.26611	1.48526	2.3915	0.906244
1207	CG11426	4.02403	4.488	4.07569	4.2763	4.25602	4.176	-0.0800172
1208	CG1143	6.0802	5.94056	6.36603	6.35468	6.01038	6.36036	0.349974
1209	CG11436	3.41822	3.33097	3.2871	3.21195	3.37459	3.24952	-0.125069
1210	CG11438	3.94325	3.29057	3.33008	3.5281	3.61691	3.42909	-0.187817
1211	CG11444	6.2902	6.14028	6.43804	6.2893	6.21524	6.36367	0.148435
1212	CG11454	3.5162	3.71771	3.89569	4.0886	3.61696	3.99215	0.375191
1213	CG11456	3.33221	3.23675	3.16203	3.41393	3.28448	3.28798	0.00349963
1214	CG11459	6.40301	5.33106	6.97241	6.79312	5.86704	6.88277	1.01573
1215	CG1146	6.09984	5.76481	5.73936	5.47211	5.93233	5.60573	-0.326592
1216	CG11470	5.23936	5.82791	5.98362	5.91993	5.53363	5.95177	0.41814
1217	CG11474	6.13899	6.01414	6.42478	6.47954	6.07657	6.45216	0.375588
1218	CG11475	2.35579	2.45533	1.80199	1.78323	2.40556	1.79261	-0.612949
1219	CG11504	4.26286	4.06386	4.30367	4.64314	4.16336	4.4734	0.310037
1220	CG11523	3.85115	3.7138	4.03046	4.25085	3.78247	4.14065	0.35818
1221	CG11529	7.0133	7.01089	6.96168	7.67022	7.0121	7.31595	0.303846
1222	CG11537	6.08969	6.44782	6.42394	6.56994	6.26875	6.49694	0.228183
1223	CG11550	2.71025	2.41252	3.36136	3.00553	2.56139	3.18344	0.622055
1224	CG11555	3.51393	3.65377	3.83353	3.32899	3.58385	3.58126	-0.00259145
1225	CG11560	2.94654	3.00511	3.3293	3.31426	2.97582	3.32178	0.345956
1226	CG11562	4.0825	3.81075	3.63401	3.53164	3.94662	3.58283	-0.363797
1227	CG11563	3.44872	3.36331	3.41127	3.46939	3.40602	3.44033	0.0343171
1228	CG11583	4.2358	4.19409	4.29156	4.15743	4.21495	4.22449	0.00954748
1229	CG11584	1.38317	0.973236	-0.187196	0.517413	1.1782	0.165108	-1.0131
1230	CG11586	4.08547	3.88831	4.19019	4.37835	3.98689	4.28427	0.297381
1231	CG11588	3.86006	3.64775	3.10189	2.53214	3.7539	2.81701	-0.936887
1232	CG11590	5.103	4.76778	5.79603	6.10966	4.93539	5.95285	1.01746
1233	CG11593	5.02431	5.14087	5.05107	5.14695	5.08259	5.09901	0.0164183
1234	CG11594	5.15242	5.72331	6.28886	6.37784	5.43786	6.33335	0.895485
1235	CG11596	4.90277	5.04875	4.83355	4.94314	4.97576	4.88834	-0.0874139
1236	CG11597	3.0264	2.92699	3.13523	2.96942	2.9767	3.05233	0.0756294
1237	CG11601	3.52586	3.05833	3.50545	3.43952	3.2921	3.47248	0.180386
1238	CG1161	6.33095	6.20499	6.42575	6.74481	6.26797	6.58528	0.317312
1239	CG11619	1.28183	1.40687	1.01765	1.04634	1.34435	1.03199	-0.31236
1240	CG11630	2.4035	2.36017	1.90663	1.77506	2.38184	1.84085	-0.540987
1241	CG11634	2.46568	2.15411	1.79867	1.54851	2.3099	1.67359	-0.636302
1242	CG11635	3.42358	3.19722	3.44389	3.47202	3.3104	3.45795	0.147555
1243	CG11638	2.95054	2.93937	2.30484	2.78803	2.94496	2.54643	-0.398523
1244	CG11655	2.94378	3.22939	3.11398	3.32778	3.08658	3.22088	0.134299
1245	CG11656	3.69044	3.43995	3.53537	3.69286	3.5652	3.61411	0.0489176
1246	CG11658	6.71677	6.52435	6.61772	6.71239	6.62056	6.66506	0.0444938
1247	CG11663	2.29721	1.94952	2.49117	2.72545	2.12336	2.60831	0.484944
1248	CG11666	-0.354633	-0.321079	0.149046	0.382749	-0.337856	0.265898	0.603754
1249	CG11668	2.84232	2.83703	2.93795	3.12782	2.83967	3.03289	0.193216
1250	CG11670	3.52217	3.74688	3.89088	4.28345	3.63453	4.08716	0.452639
1251	CG11672	3.90127	4.37466	3.51082	2.90794	4.13797	3.20938	-0.928589
1252	CG11679	3.43872	3.53531	3.65551	3.76328	3.48701	3.70939	0.22238
1253	CG11686	4.79501	4.79965	4.96044	4.87945	4.79733	4.91995	0.122615
1254	CG11694	2.37971	2.38566	2.23501	2.21292	2.38268	2.22397	-0.158718
1255	CG11695	3.31602	3.04062	3.25887	3.64793	3.17832	3.4534	0.27508
1256	CG11696	3.96586	3.97987	3.97824	4.24963	3.97287	4.11394	0.141069
1257	CG11698	1.60612	0.92852	1.08154	0.896043	1.26732	0.988791	-0.278528
1258	CG11699	4.69538	4.78963	4.9624	5.39121	4.74251	5.1768	0.434295
1259	CG11700	2.25463	1.39241	4.38205	4.36432	1.82352	4.37318	2.54967
1260	CG11703	3.41592	2.69855	3.01965	2.92798	3.05724	2.97382	-0.0834197
1261	CG11710	4.62589	4.44435	4.27856	4.5785	4.53512	4.42853	-0.106587
1262	CG11714	4.61212	4.18186	3.74255	3.2737	4.39699	3.50812	-0.888868
1263	CG1172	6.75995	6.18297	6.52355	6.85376	6.47146	6.68865	0.217193
1264	CG11722	3.2704	2.91849	3.18889	2.68022	3.09445	2.93455	-0.159895
1265	CG11723	3.97498	3.93788	4.16639	4.17442	3.95643	4.1704	0.213974
1266	CG11726	2.7646	2.39453	2.4196	1.91148	2.57957	2.16554	-0.414024
1267	CG11737	7.16906	7.10987	7.36358	7.38443	7.13947	7.37401	0.234541
1268	CG11741	0.631687	-0.230169	0.786824	1.59998	0.200759	1.1934	0.992641
1269	CG11752	4.61174	4.6447	5.05433	4.94939	4.62822	5.00186	0.373642
1270	CG11755	1.6432	1.46256	1.91305	1.19179	1.55288	1.55242	-0.000456074
1271	CG11756	2.12538	1.72054	1.71982	1.60409	1.92296	1.66195	-0.261006
1272	CG11760	3.51142	3.50053	3.3728	3.5542	3.50597	3.4635	-0.0424766
1273	CG11768	1.92506	1.96353	1.45632	2.01532	1.9443	1.73582	-0.208476
1274	CG11771	5.01639	5.08671	5.28504	5.48995	5.05155	5.3875	0.335949
1275	CG11777	3.00663	3.08686	3.29447	3.18813	3.04674	3.2413	0.194555
1276	CG11779	5.32003	5.20221	5.23577	5.12226	5.26112	5.17902	-0.0821035
1277	CG11788	3.24569	2.95998	2.99979	2.99233	3.10284	2.99606	-0.106779
1278	CG11790	6.09462	5.99341	6.30557	5.829	6.04402	6.06729	0.0232672
1279	CG11791	6.06531	6.03737	5.96171	5.70993	6.05134	5.83582	-0.215517
1280	CG11807	5.27335	5.29357	5.24883	5.12523	5.28346	5.18703	-0.0964259
1281	CG11808	3.1991	3.12115	3.21941	3.3061	3.16012	3.26275	0.102629
1282	CG11811	5.19877	5.24674	5.33309	5.3962	5.22276	5.36465	0.141891
1283	CG11815	2.95422	2.92772	2.87913	2.99148	2.94097	2.93531	-0.00566448
1284	CG11816	0.46259	0.151761	-1.57574	-1.27657	0.307176	-1.42616	-1.73333
1285	CG11835	4.74309	5.12086	4.96641	5.00799	4.93197	4.9872	0.0552279
1286	CG11836	2.45707	2.57629	2.5486	2.15652	2.51668	2.35256	-0.164121
1287	CG11837	2.85804	2.93328	3.02284	3.01312	2.89566	3.01798	0.122321
1288	CG11839	2.88905	2.77819	3.08448	2.67851	2.83362	2.8815	0.0478783
1289	CG11841	-0.30155	-0.155121	0.646341	0.929105	-0.228336	0.787723	1.01606
1290	CG11842	0.0824798	-0.212134	0.122003	-0.117785	-0.0648269	0.00210889	0.0669358
1291	CG11843	1.24322	0.702243	1.12893	0.594179	0.972731	0.861552	-0.111179
1292	CG11852	3.60133	3.80068	4.28065	4.66782	3.701	4.47423	0.773233
1293	CG11854	7.93085	8.01631	9.03776	9.723	7.97358	9.38038	1.4068
1294	CG11857	6.57931	6.61191	6.63783	6.5586	6.59561	6.59822	0.00260338
1295	CG11858	3.71155	3.85471	4.0993	4.26395	3.78313	4.18163	0.398498
1296	CG11878	-0.579723	0.352325	0.162751	-0.595454	-0.113699	-0.216351	-0.102652
1297	CG11882	4.64429	4.47103	4.54304	4.5905	4.55766	4.56677	0.00911052
1298	CG11883	4.15722	3.73287	3.65976	3.46494	3.94504	3.56235	-0.382692
1299	CG11885	4.28451	3.91945	4.36033	4.37892	4.10198	4.36962	0.267645
1300	CG11889	3.34183	3.70796	4.15241	3.99952	3.5249	4.07596	0.551065
1301	CG11891	0.962256	1.70371	2.88851	2.64006	1.33298	2.76429	1.4313
1302	CG11892	7.69972	7.56261	8.20662	7.99153	7.63116	8.09907	0.46791
1303	CG11893	-1.02242	-0.771014	2.80344	3.7411	-0.896719	3.27227	4.16899
1304	CG11898	1.06735	1.90051	1.66266	1.76295	1.48393	1.71281	0.228876
1305	CG11899	7.40699	6.8893	7.09055	7.16385	7.14814	7.1272	-0.0209415
1306	CG11902	4.31507	4.31354	4.19635	4.02897	4.31431	4.11266	-0.20165
1307	CG11905	4.42288	4.22581	4.35535	4.37908	4.32435	4.36722	0.0428699
1308	CG11906	3.41769	3.42132	3.46391	3.77321	3.4195	3.61856	0.199059
1309	CG11911	7.66161	8.41936	8.94832	8.16269	8.04048	8.55551	0.515025
1310	CG11912	8.51381	9.34405	10.0508	9.97185	8.92893	10.0113	1.08237
1311	CG11920	3.33434	3.42251	3.46847	3.03829	3.37842	3.25338	-0.125044
1312	CG11927	4.71696	4.60546	4.68175	4.8774	4.66121	4.77958	0.118364
1313	CG11929	5.10309	4.78889	5.08713	4.73625	4.94599	4.91169	-0.0342998
1314	CG11961	5.89865	6.35478	6.24127	6.05436	6.12671	6.14781	0.0211008
1315	CG11964	4.59331	4.7997	4.87928	5.06373	4.69651	4.9715	0.274998
1316	CG11970	4.97648	5.14709	4.8978	4.98236	5.06178	4.94008	-0.121704
1317	CG11975	5.53336	5.47582	5.52917	5.43159	5.50459	5.48038	-0.0242119
1318	CG11977	0.0361906	-0.152484	0.338773	-0.236736	-0.0581468	0.0510186	0.109165
1319	CG11980	5.17001	5.08602	5.34452	5.32379	5.12802	5.33415	0.206138
1320	CG11983	3.12676	3.03384	3.21337	2.6889	3.0803	2.95113	-0.129166
1321	CG11986	3.69731	3.5017	3.59068	3.47226	3.59951	3.53147	-0.0680356
1322	CG11999	5.00758	5.03363	5.21898	5.50237	5.0206	5.36067	0.34007
1323	CG12003	0.928935	1.24988	1.09098	0.993778	1.08941	1.04238	-0.0470266
1324	CG12009	4.77915	4.16175	4.35115	4.20881	4.47045	4.27998	-0.190468
1325	CG12010	2.68216	2.43515	2.66558	2.37568	2.55865	2.52063	-0.0380269
1326	CG12012	5.43585	5.49948	5.58479	5.25765	5.46766	5.42122	-0.0464419
1327	CG12016	5.56293	4.71088	5.10982	4.94421	5.13691	5.02701	-0.109891
1328	CG12017	1.12983	0.65244	0.94943	0.649989	0.891133	0.799709	-0.0914234
1329	CG12020	3.26516	2.61994	2.85408	2.82346	2.94255	2.83877	-0.103779
1330	CG12024	5.68085	5.58679	5.756	6.00318	5.63382	5.87959	0.245768
1331	CG12025	6.40794	6.11504	6.33935	6.27941	6.26149	6.30938	0.0478895
1332	CG12035	3.24369	3.02065	2.69654	2.76923	3.13217	2.73289	-0.399283
1333	CG12038	2.66828	2.55233	2.50881	2.53992	2.6103	2.52436	-0.0859413
1334	CG12054	6.59106	6.73061	6.62424	6.92914	6.66084	6.77669	0.115856
1335	CG12056	3.20251	3.11291	3.12593	3.5514	3.15771	3.33866	0.180953
1336	CG12057	9.72438	9.43102	9.72515	10.0712	9.5777	9.89817	0.320465
1337	CG12061	1.77886	1.73232	1.65372	0.975318	1.75559	1.31452	-0.44107
1338	CG12065	6.00146	6.26392	5.94621	6.21124	6.13269	6.07873	-0.0539646
1339	CG12069	3.05293	2.98752	2.54518	2.74028	3.02022	2.64273	-0.377495
1340	CG12071	3.49598	3.43587	2.84296	3.25882	3.46592	3.05089	-0.415037
1341	CG12075	5.1774	5.25039	5.12118	5.55308	5.21389	5.33713	0.123238
1342	CG12078	2.4625	2.24115	2.20403	1.8408	2.35183	2.02241	-0.329414
1343	CG1208	1.51121	2.20084	1.71264	2.03708	1.85603	1.87486	0.0188295
1344	CG12081	5.34325	5.20212	5.42216	5.52962	5.27269	5.47589	0.203203
1345	CG12084	5.75425	5.85694	5.70693	5.76289	5.80559	5.73491	-0.0706814
1346	CG12091	6.16905	6.22094	6.20445	6.56477	6.195	6.38461	0.189611
1347	CG12093	4.45603	4.53414	4.84127	4.68373	4.49508	4.7625	0.267411
1348	CG12096	4.91302	4.78685	4.88614	4.91795	4.84994	4.90205	0.0521076
1349	CG12099	7.13249	7.39002	7.25819	7.27054	7.26126	7.26436	0.00310413
1350	CG12104	4.86173	4.74704	4.74128	4.79291	4.80438	4.76709	-0.0372893
1351	CG12105	2.66295	2.81643	2.35239	2.41898	2.73969	2.38568	-0.354004
1352	CG12106	2.43617	2.61506	2.21765	2.35454	2.52561	2.28609	-0.23952
1353	CG12107	4.7698	4.73889	5.05184	5.05553	4.75434	5.05369	0.299344
1354	CG12112	4.26329	3.9968	2.93519	2.28168	4.13004	2.60844	-1.52161
1355	CG12115	8.41678	8.40421	8.40197	8.41978	8.41049	8.41088	0.000384957
1356	CG12116	7.69736	7.83433	7.48286	7.32849	7.76585	7.40568	-0.360171
1357	CG12118	4.78077	4.69736	4.93028	5.00002	4.73906	4.96515	0.226088
1358	CG12121	6.01004	6.16277	6.08445	5.99916	6.08641	6.04181	-0.0445989
1359	CG12123	3.38867	3.32094	3.35217	3.253	3.35481	3.30258	-0.0522215
1360	CG12126	2.34825	1.82769	2.20064	1.24058	2.08797	1.72061	-0.367357
1361	CG12128	4.18825	4.15229	4.18565	4.18723	4.17027	4.18644	0.0161682
1362	CG12129	4.24936	4.15837	4.52875	4.39	4.20386	4.45937	0.255511
1363	CG1213	5.24753	3.06697	3.57937	2.88798	4.15725	3.23367	-0.923576
1364	CG12134	3.33137	3.65347	3.74341	3.82664	3.49242	3.78502	0.2926
1365	CG12147	3.43267	3.21823	2.91373	3.14742	3.32545	3.03058	-0.294873
1366	CG12155	4.47566	4.65175	4.39243	4.53968	4.5637	4.46606	-0.0976469
1367	CG12159	5.41409	5.42338	5.58968	5.58344	5.41874	5.58656	0.167821
1368	CG12170	3.61561	3.68623	3.7167	4.25437	3.65092	3.98553	0.334614
1369	CG12171	4.64528	4.82767	5.09852	5.17497	4.73648	5.13675	0.400269
1370	CG12173	4.13569	4.01567	4.35057	4.41573	4.07568	4.38315	0.307469
1371	CG12177	2.59115	2.68684	2.74782	3.48395	2.63899	3.11588	0.476888
1372	CG1218	4.90116	4.32273	4.52948	4.32658	4.61195	4.42803	-0.183915
1373	CG12182	3.37191	3.39073	3.32434	2.92666	3.38132	3.1255	-0.25582
1374	CG12194	4.63444	5.08195	4.13609	4.273	4.85819	4.20455	-0.653649
1375	CG12204	2.26572	2.46718	2.67643	3.07085	2.36645	2.87364	0.50719
1376	CG12206	4.63355	4.53606	4.30351	4.39688	4.58481	4.3502	-0.234608
1377	CG12209	2.78473	2.42012	2.46771	1.98328	2.60243	2.2255	-0.376931
1378	CG12213	5.9591	5.87746	5.84492	5.92865	5.91828	5.88679	-0.0314928
1379	CG12219	3.91655	3.85193	3.69699	4.07375	3.88424	3.88537	0.00112931
1380	CG12224	2.28125	2.72473	2.64876	2.38042	2.50299	2.51459	0.0116027
1381	CG12229	4.71833	4.44734	4.34354	4.23707	4.58284	4.2903	-0.292534
1382	CG12231	0.03898	-0.0949209	0.223974	-1.03758	-0.0279705	-0.406805	-0.378834
1383	CG12236	4.42218	4.5171	4.10582	4.36119	4.46964	4.23351	-0.236132
1384	CG12237	4.91919	4.84084	4.97066	4.99522	4.88002	4.98294	0.10292
1385	CG12239	3.08125	3.15166	2.75448	3.20963	3.11646	2.98205	-0.1344
1386	CG12241	5.18235	5.1648	5.20789	5.11907	5.17358	5.16348	-0.0100966
1387	CG12253	3.37741	3.11582	2.91381	2.64514	3.24661	2.77947	-0.467138
1388	CG12259	3.95917	4.13582	4.06177	4.4304	4.04749	4.24609	0.198594
1389	CG12268	3.5352	2.79307	2.47904	2.5669	3.16413	2.52297	-0.64116
1390	CG1227	3.11274	2.95663	2.86334	2.844	3.03468	2.85367	-0.181013
1391	CG12279	4.41581	4.2721	4.69457	4.51819	4.34395	4.60638	0.262427
1392	CG12288	3.1818	3.2086	3.28024	2.94028	3.1952	3.11026	-0.0849439
1393	CG12289	3.22672	2.68242	2.18333	2.49708	2.95457	2.34021	-0.614363
1394	CG12290	4.07486	4.22318	3.93256	3.75935	4.14902	3.84595	-0.30307
1395	CG12299	4.78652	4.88923	4.68155	4.99902	4.83787	4.84029	0.0024103
1396	CG12301	3.68601	3.8613	3.99254	3.7101	3.77365	3.85132	0.0776666
1397	CG12307	3.43824	3.12436	3.00323	2.69201	3.2813	2.84762	-0.433678
1398	CG12310	8.78712	9.03155	9.05424	9.37656	8.90934	9.2154	0.306058
1399	CG12316	4.46889	4.59127	4.6209	4.57845	4.53008	4.59968	0.0695952
1400	CG12320	3.17098	2.99054	3.33049	3.43254	3.08076	3.38151	0.300755
1401	CG12321	5.61258	5.40181	5.80167	5.86209	5.50719	5.83188	0.324685
1402	CG12325	3.62832	3.99755	3.60032	3.62558	3.81293	3.61295	-0.199983
1403	CG1233	5.39717	5.57343	5.35981	5.39834	5.4853	5.37908	-0.106224
1404	CG1234	4.57732	4.67153	4.66043	4.64846	4.62443	4.65445	0.0300221
1405	CG12341	4.27955	4.29779	4.33147	3.98613	4.28867	4.1588	-0.129871
1406	CG12343	4.86316	4.62267	4.58675	4.40658	4.74292	4.49667	-0.246248
1407	CG12344	1.54773	1.83127	1.51769	1.75383	1.6895	1.63576	-0.0537407
1408	CG12347	0.642075	0.565865	0.326909	0.458545	0.60397	0.392727	-0.211243
1409	CG12355	2.19501	1.95447	1.67983	1.29986	2.07474	1.48984	-0.584898
1410	CG1236	7.89391	7.71368	7.97174	8.39962	7.8038	8.18568	0.381882
1411	CG12362	4.15411	3.81764	4.07242	3.64231	3.98587	3.85737	-0.128505
1412	CG12374	1.87644	0.351706	0.286839	0.0374217	1.11407	0.16213	-0.951942
1413	CG12375	4.69156	4.7598	4.78653	4.75847	4.72568	4.7725	0.0468209
1414	CG12376	4.17226	3.71471	3.86679	3.4848	3.94349	3.67579	-0.267694
1415	CG12379	0.814016	1.0908	1.3105	1.05049	0.952409	1.18049	0.228085
1416	CG12384	7.46909	7.45182	7.77378	7.75883	7.46045	7.7663	0.305849
1417	CG1239	2.34899	2.29499	2.52422	2.46976	2.32199	2.49699	0.175001
1418	CG12391	5.36073	5.459	5.31124	5.44386	5.40986	5.37755	-0.0323114
1419	CG12395	1.99931	1.63813	1.7096	1.06751	1.81872	1.38856	-0.430161
1420	CG12402	3.28707	3.36802	2.96571	2.90324	3.32754	2.93448	-0.393065
1421	CG12426	0.966505	0.644712	0.0950247	0.0856643	0.805608	0.0903445	-0.715264
1422	CG12438	2.06263	1.94172	1.05758	0.619121	2.00217	0.838349	-1.16383
1423	CG12439	0.162405	0.46068	0.456549	-0.307979	0.311542	0.0742849	-0.237257
1424	CG12446	2.01905	1.56607	-1.56492	-1.44174	1.79256	-1.50333	-3.29589
1425	CG12448	3.83215	3.3288	3.2007	2.42555	3.58048	2.81313	-0.767351
1426	CG1246	5.58456	5.55875	5.60795	5.57415	5.57165	5.59105	0.0193919
1427	CG12464	2.11236	1.684	1.66442	0.4061	1.89818	1.03526	-0.862919
1428	CG12470	4.7068	4.46338	4.54932	4.1128	4.58509	4.33106	-0.254029
1429	CG12477	1.86314	1.83003	3.12932	3.41271	1.84658	3.27101	1.42443
1430	CG12479	1.00615	0.656735	0.922215	0.607219	0.831441	0.764717	-0.0667237
1431	CG12481	2.97083	2.48753	2.0775	1.76863	2.72918	1.92306	-0.806119
1432	CG12493	4.29187	4.27663	5.11439	4.83841	4.28425	4.9764	0.692149
1433	CG12498	-3.87202	-3.87202	1.70444	1.82911	-3.87202	1.76678	5.6388
1434	CG12499	4.66642	4.99921	4.67679	4.36241	4.83281	4.5196	-0.313208
1435	CG12502	1.21795	0.502616	0.0130355	-0.818586	0.860283	-0.402775	-1.26306
1436	CG12516	2.7111	2.43212	2.16964	1.62038	2.57161	1.89501	-0.6766
1437	CG12519	2.56361	2.16484	2.43928	2.66983	2.36423	2.55456	0.190331
1438	CG12521	2.61793	2.15584	2.22441	1.6318	2.38688	1.92811	-0.458775
1439	CG12531	3.41074	3.90948	3.23427	2.82872	3.66011	3.0315	-0.628615
1440	CG12535	1.94048	1.75332	2.00717	1.84362	1.8469	1.9254	0.0784961
1441	CG12539	4.81135	5.36728	5.54605	6.08053	5.08931	5.81329	0.723975
1442	CG12541	2.69117	2.64955	2.24029	1.85578	2.67036	2.04804	-0.622319
1443	CG12547	6.15413	6.17786	6.05093	5.5593	6.16599	5.80512	-0.360874
1444	CG12560	2.6715	2.90171	3.10239	2.4747	2.78661	2.78854	0.00193918
1445	CG12567	5.71315	5.72257	5.87466	5.28518	5.71786	5.57992	-0.137937
1446	CG12576	7.38754	7.45482	7.24547	7.38226	7.42118	7.31387	-0.107312
1447	CG12581	6.46688	6.56336	6.54131	6.63294	6.51512	6.58713	0.0720062
1448	CG12589	1.30192	1.20737	1.0063	1.18605	1.25464	1.09618	-0.158463
1449	CG12592	1.97478	2.20316	2.05574	2.71648	2.08897	2.38611	0.297139
1450	CG12594	2.34579	2.26239	1.65537	1.87439	2.30409	1.76488	-0.539209
1451	CG12605	5.18107	4.96409	4.8941	5.16571	5.07258	5.02991	-0.0426711
1452	CG12608	4.39948	4.3527	4.42591	4.52882	4.37609	4.47736	0.101269
1453	CG12609	2.79718	2.79245	2.69032	2.35368	2.79481	2.522	-0.272811
1454	CG12617	3.30557	2.923	2.85467	2.80741	3.11428	2.83104	-0.283247
1455	CG12620	4.34142	3.70873	3.69801	3.28023	4.02507	3.48912	-0.535952
1456	CG12637	2.20125	1.87383	1.99401	1.87572	2.03754	1.93486	-0.102674
1457	CG12643	6.5339	5.86907	5.88935	5.28155	6.20149	5.58545	-0.616036
1458	CG1265	4.81156	4.98204	5.17914	5.37375	4.8968	5.27645	0.379649
1459	CG12655	4.12108	3.36185	4.04442	4.44018	3.74146	4.2423	0.500837
1460	CG12659	2.70424	2.2771	2.83519	2.64555	2.49067	2.74037	0.2497
1461	CG12674	3.10833	2.5194	3.63547	3.70387	2.81387	3.66967	0.855801
1462	CG12679	2.67471	2.38892	2.65779	2.9626	2.53182	2.81019	0.278375
1463	CG12680	0.536166	-0.0675088	0.0879116	0.786364	0.234328	0.437138	0.202809
1464	CG12682	0.0361459	0.317384	-0.347276	-0.182301	0.176765	-0.264789	-0.441553
1465	CG12684	3.03268	2.63184	2.7355	2.52768	2.83226	2.63159	-0.200672
1466	CG12689	4.12566	3.65424	3.90846	3.55025	3.88995	3.72935	-0.160596
1467	CG12691	0.711696	0.51366	1.0309	0.833452	0.612678	0.932177	0.3195
1468	CG12692	4.21784	3.79789	2.6686	2.92258	4.00786	2.79559	-1.21228
1469	CG12693	3.46598	3.11373	3.09189	3.11697	3.28986	3.10443	-0.185428
1470	CG12698	3.19199	2.74866	2.86762	2.88139	2.97033	2.87451	-0.0958195
1471	CG12699	7.57507	7.06987	7.04454	6.90579	7.32247	6.97516	-0.347307
1472	CG12702	3.67084	3.70439	3.87633	4.24976	3.68762	4.06305	0.375429
1473	CG12708	2.59483	2.42832	2.38557	2.47015	2.51158	2.42786	-0.0837187
1474	CG1271	4.22516	4.06677	4.29325	4.4382	4.14596	4.36573	0.219764
1475	CG12713	2.49877	2.33329	2.94429	2.78548	2.41603	2.86489	0.448858
1476	CG12715	6.62319	7.15322	6.67888	6.5528	6.88821	6.61584	-0.272367
1477	CG12725	0.386449	0.430819	1.16832	1.56009	0.408634	1.3642	0.955571
1478	CG12728	3.84213	3.69097	4.17845	3.86834	3.76655	4.02339	0.256842
1479	CG12729	1.48478	1.03114	-0.699672	-1.47201	1.25796	-1.08584	-2.3438
1480	CG1273	4.83495	4.72377	4.61046	4.26488	4.77936	4.43767	-0.341693
1481	CG12730	4.29713	4.15805	4.18272	4.15718	4.22759	4.16995	-0.0576438
1482	CG12744	2.38916	2.4116	2.38758	2.14005	2.40038	2.26381	-0.136566
1483	CG12746	3.95389	4.09926	4.05548	4.22643	4.02658	4.14095	0.114377
1484	CG1275	6.15556	6.15767	6.13869	6.10764	6.15662	6.12317	-0.0334509
1485	CG12768	3.58597	3.50487	3.35564	3.43888	3.54542	3.39726	-0.148158
1486	CG12773	6.7012	6.90394	6.8175	7.23818	6.80257	7.02784	0.225269
1487	CG12780	4.07102	3.92742	4.06608	3.96552	3.99922	4.0158	0.0165816
1488	CG12782	2.75512	2.05117	2.45962	2.52592	2.40315	2.49277	0.0896282
1489	CG12783	1.61536	0.468948	1.22134	0.669367	1.04215	0.945353	-0.0967993
1490	CG12784	1.89975	1.41342	0.999012	0.352998	1.65658	0.676005	-0.980576
1491	CG12795	5.57048	5.28408	5.31863	5.56483	5.42728	5.44173	0.0144478
1492	CG12811	5.10469	5.03381	5.38418	5.14537	5.06925	5.26477	0.195522
1493	CG12814	5.78244	5.89912	5.76263	5.91648	5.84078	5.83956	-0.00122646
1494	CG12817	1.58762	1.77403	1.31288	1.49607	1.68082	1.40448	-0.276348
1495	CG12818	3.01875	2.98568	2.98247	2.6737	3.00221	2.82808	-0.174129
1496	CG12822	4.54522	4.75492	4.68641	4.93693	4.65007	4.81167	0.161602
1497	CG12824	5.10359	4.81561	5.35908	5.29297	4.9596	5.32603	0.366427
1498	CG12825	5.35002	5.77648	5.89139	5.4201	5.56325	5.65575	0.0924998
1499	CG12826	4.62952	4.80632	3.90806	4.17442	4.71792	4.04124	-0.676682
1500	CG12831	3.43764	3.00202	2.69424	2.61163	3.21983	2.65294	-0.566893
1501	CG12848	3.24263	3.02669	3.64991	4.00137	3.13466	3.82564	0.690975
1502	CG12851	3.46913	3.25163	3.10518	3.13295	3.36038	3.11906	-0.241317
1503	CG12853	3.9392	3.72688	3.63359	3.11467	3.83304	3.37413	-0.458909
1504	CG12857	3.78724	3.65375	3.72205	3.56715	3.7205	3.6446	-0.0758983
1505	CG12860	6.51104	6.00518	5.76068	5.65215	6.25811	5.70641	-0.551695
1506	CG12861	6.34573	5.88606	5.7933	5.80182	6.1159	5.79756	-0.318338
1507	CG12863	2.43389	2.74306	2.81736	2.56349	2.58848	2.69042	0.101948
1508	CG12868	4.81671	4.88058	4.85615	3.74552	4.84864	4.30083	-0.547809
1509	CG12877	4.44978	4.59062	4.81537	4.74061	4.5202	4.77799	0.257785
1510	CG1288	5.52388	5.16023	4.94517	4.75288	5.34205	4.84902	-0.493031
1511	CG12880	5.66955	5.35088	5.56877	5.44116	5.51021	5.50497	-0.00524565
1512	CG12883	3.29363	3.43223	3.34919	3.40026	3.36293	3.37472	0.0117923
1513	CG12895	3.20756	3.42807	3.5002	3.1142	3.31781	3.3072	-0.0106182
1514	CG12902	4.65224	4.24108	4.21982	4.26922	4.44666	4.24452	-0.202137
1515	CG12909	3.15083	3.30097	3.35249	3.4029	3.2259	3.37769	0.151794
1516	CG12910	3.33532	3.85685	3.66113	4.03236	3.59608	3.84674	0.250658
1517	CG12911	0.912105	1.06003	1.11488	1.48913	0.986066	1.302	0.315939
1518	CG12914	1.36755	1.15827	0.965189	0.831499	1.26291	0.898344	-0.364563
1519	CG12917	1.5507	0.870309	1.30613	1.25185	1.21051	1.27899	0.0684836
1520	CG12923	2.93481	2.84836	2.32043	2.03886	2.89158	2.17965	-0.711936
1521	CG12926	5.95068	5.85455	6.09076	6.16017	5.90262	6.12547	0.222851
1522	CG12929	2.53703	1.87011	2.63733	2.67915	2.20357	2.65824	0.454669
1523	CG12934	8.21194	8.4578	8.15282	7.75898	8.33487	7.9559	-0.378967
1524	CG12935	2.69042	2.55995	2.92306	2.61813	2.62518	2.7706	0.145413
1525	CG12942	4.00912	4.03204	4.08922	4.2483	4.02058	4.16876	0.148181
1526	CG12945	4.90386	4.95791	5.01374	4.77916	4.93089	4.89645	-0.0344314
1527	CG12947	1.78985	2.23994	1.81478	2.57632	2.01489	2.19555	0.180654
1528	CG12948	4.78058	4.52182	4.8686	4.91631	4.6512	4.89245	0.241255
1529	CG12951	4.57831	4.94951	5.58369	6.13814	4.76391	5.86092	1.09701
1530	CG12963	6.40857	6.27494	6.16042	6.23735	6.34176	6.19888	-0.142872
1531	CG12964	2.04144	2.3715	1.78349	2.33913	2.20647	2.06131	-0.14516
1532	CG12974	7.10522	7.10569	7.28361	7.25531	7.10546	7.26946	0.164002
1533	CG12983	5.01659	4.67448	4.44953	4.14079	4.84554	4.29516	-0.550376
1534	CG12984	0.349431	-0.333467	0.175394	0.590112	0.00798217	0.382753	0.374771
1535	CG12985	1.42407	1.09734	1.32731	1.40098	1.2607	1.36414	0.103442
1536	CG1299	6.33448	6.34036	6.28038	6.58438	6.33742	6.43238	0.0949673
1537	CG12991	5.69679	5.58234	5.40638	5.43732	5.63957	5.42185	-0.217715
1538	CG12992	4.09725	3.86466	4.05746	3.85488	3.98095	3.95617	-0.0247819
1539	CG13001	3.97977	4.15019	4.06473	4.34272	4.06498	4.20372	0.138742
1540	CG13003	4.28774	4.99979	4.52237	4.39209	4.64377	4.45723	-0.186535
1541	CG13004	4.32574	3.74783	3.6918	4.11928	4.03678	3.90554	-0.131243
1542	CG13005	2.09338	2.20706	1.88037	2.19695	2.15022	2.03866	-0.111559
1543	CG13008	4.16251	3.80851	3.87345	3.91743	3.98551	3.89544	-0.0900677
1544	CG13010	2.31439	1.676	2.24743	2.48417	1.99519	2.3658	0.370605
1545	CG13012	4.74358	3.79151	4.01044	2.91598	4.26754	3.46321	-0.804338
1546	CG13014	3.04936	3.07066	3.44943	3.39061	3.06001	3.42002	0.360009
1547	CG13016	3.51262	3.69211	3.61485	3.34975	3.60236	3.4823	-0.120064
1548	CG13018	1.79758	1.67744	1.94638	2.22594	1.73751	2.08616	0.348647
1549	CG13021	1.33435	0.906758	1.13009	1.09589	1.12055	1.11299	-0.00756399
1550	CG13023	3.21573	3.41395	2.80779	3.19677	3.31484	3.00228	-0.31256
1551	CG13024	3.45028	2.32764	3.24761	2.28654	2.88896	2.76708	-0.121885
1552	CG13028	1.64203	1.6426	2.0419	2.44076	1.64232	2.24133	0.599011
1553	CG13029	2.07857	2.38539	2.15857	1.04276	2.23198	1.60066	-0.631323
1554	CG13032	4.63839	4.02951	4.20128	4.323	4.33395	4.26214	-0.0718107
1555	CG13039	1.7438	1.65696	1.25942	0.860341	1.70038	1.05988	-0.6405
1556	CG1304	-0.576296	0.539517	1.6515	0.45531	-0.0183896	1.05341	1.0718
1557	CG13041	3.1114	3.55791	3.93302	4.26073	3.33466	4.09688	0.76222
1558	CG13043	1.20794	1.72343	2.13044	3.19559	1.46569	2.66301	1.19733
1559	CG13044	4.37046	4.84822	4.67538	5.38934	4.60934	5.03236	0.423016
1560	CG13045	-0.433963	0.0979518	0.546957	0.660215	-0.168005	0.603586	0.771592
1561	CG13046	1.97656	1.68894	1.68753	1.91041	1.83275	1.79897	-0.0337802
1562	CG13051	-0.103064	0.559543	0.901251	0.865994	0.22824	0.883623	0.655383
1563	CG13060	0.751676	1.34219	1.92636	2.31858	1.04693	2.12247	1.07553
1564	CG13063	0.474732	1.32759	2.10642	2.98302	0.90116	2.54472	1.64356
1565	CG13067	3.64227	4.34746	4.46055	4.44078	3.99486	4.45066	0.455803
1566	CG1307	4.68655	4.6679	5.04931	5.39216	4.67722	5.22074	0.543514
1567	CG13074	0.000862525	-0.450025	-0.100632	0.260682	-0.224581	0.0800249	0.304606
1568	CG13075	4.7522	4.8764	5.30833	4.7479	4.8143	5.02812	0.213816
1569	CG13082	4.32975	3.49252	3.67661	3.5365	3.91114	3.60656	-0.304579
1570	CG13085	-0.211143	-0.470228	0.620872	1.08895	-0.340685	0.854912	1.1956
1571	CG13086	2.64353	2.51706	3.02488	3.19971	2.5803	3.11229	0.531997
1572	CG13088	4.44594	4.16265	4.10226	4.02553	4.3043	4.06389	-0.240403
1573	CG1309	5.72644	5.7029	5.84344	5.8083	5.71467	5.82587	0.111201
1574	CG13096	5.8249	5.88347	6.03859	6.19888	5.85419	6.11873	0.264547
1575	CG13097	4.31389	4.22235	4.21053	4.26912	4.26812	4.23982	-0.0282975
1576	CG13101	2.19935	2.46039	2.96917	3.27668	2.32987	3.12293	0.793056
1577	CG13102	3.50115	3.68229	4.04794	3.31461	3.59172	3.68128	0.0895534
1578	CG13108	1.26575	1.02842	1.07824	0.975639	1.14709	1.02694	-0.120149
1579	CG13110	3.09372	2.87316	2.35417	2.05909	2.98344	2.20663	-0.776813
1580	CG13116	2.20947	2.40729	2.42412	3.12865	2.30838	2.77638	0.468003
1581	CG13117	4.71874	4.15135	4.50657	4.63037	4.43504	4.56847	0.13343
1582	CG13123	2.3883	2.2449	2.27107	2.26925	2.3166	2.27016	-0.0464413
1583	CG13124	6.16391	6.40477	6.16229	6.06817	6.28434	6.11523	-0.169111
1584	CG13126	2.90662	2.92722	3.15673	3.0335	2.91692	3.09512	0.178202
1585	CG13127	1.85999	1.76923	1.78227	1.5848	1.81461	1.68354	-0.131072
1586	CG13131	3.64066	3.43801	3.35945	2.57331	3.53933	2.96638	-0.572953
1587	CG13137	0.698713	0.924256	0.845488	0.540226	0.811484	0.692857	-0.118627
1588	CG1314	3.10158	2.66675	2.68688	2.94356	2.88417	2.81522	-0.0689454
1589	CG13148	2.71495	2.29547	2.45589	2.26344	2.50521	2.35966	-0.145542
1590	CG13151	3.25734	2.87604	3.33667	3.39069	3.06669	3.36368	0.296987
1591	CG1316	6.4923	6.59555	6.47673	6.68993	6.54393	6.58333	0.0394014
1592	CG13160	2.90844	3.55799	3.2279	3.29773	3.23321	3.26282	0.0296036
1593	CG13168	5.35319	4.93804	4.85969	4.76735	5.14562	4.81352	-0.332099
1594	CG1317	6.57316	6.71635	6.55961	6.71073	6.64476	6.63517	-0.00959315
1595	CG13175	2.84686	2.79879	2.83211	2.61368	2.82283	2.7229	-0.0999321
1596	CG13177	5.97725	6.23614	6.45076	5.53965	6.1067	5.99521	-0.111489
1597	CG13185	5.40674	5.90633	5.49765	5.26974	5.65654	5.38369	-0.272843
1598	CG13186	2.855	2.64184	2.62479	2.47834	2.74842	2.55157	-0.196853
1599	CG13192	4.05072	3.98601	4.10079	4.1083	4.01837	4.10455	0.0861799
1600	CG13196	0.259996	-0.772931	0.112872	-0.265	-0.256468	-0.0760641	0.180404
1601	CG13197	4.59611	4.40173	4.47314	4.23518	4.49892	4.35416	-0.144762
1602	CG13202	0.87086	-0.444306	0.810986	0.577349	0.213277	0.694168	0.480891
1603	CG13203	1.02709	0.765483	0.679134	0.480247	0.896287	0.579691	-0.316596
1604	CG13204	3.99871	3.89971	3.85994	4.0237	3.94921	3.94182	-0.00739016
1605	CG13215	3.21584	1.51183	2.21019	0.965145	2.36383	1.58767	-0.776166
1606	CG13220	4.95604	4.94044	5.2192	5.12846	4.94824	5.17383	0.225591
1607	CG13223	0.343197	0.0478373	0.0213646	0.641416	0.195517	0.33139	0.135873
1608	CG13227	0.584032	1.18277	0.771229	1.13983	0.8834	0.955528	0.0721282
1609	CG13229	1.56358	1.29787	1.43388	1.91526	1.43072	1.67457	0.243845
1610	CG1324	5.04953	4.58806	4.74143	4.83416	4.81879	4.78779	-0.0309979
1611	CG13243	3.84391	2.93802	3.3135	3.06051	3.39097	3.18701	-0.20396
1612	CG13244	2.51014	2.09761	2.01506	2.06441	2.30387	2.03973	-0.264138
1613	CG13245	4.67691	4.3556	4.47399	4.41475	4.51626	4.44437	-0.0718889
1614	CG13248	2.17342	2.30959	1.63281	2.00078	2.24151	1.81679	-0.424713
1615	CG13252	7.12611	6.92772	7.05705	6.75787	7.02692	6.90746	-0.119456
1616	CG13255	5.49553	5.46831	5.92412	5.92328	5.48192	5.9237	0.441781
1617	CG13272	2.30759	2.67508	2.08689	1.92532	2.49133	2.00611	-0.485225
1618	CG13280	3.53825	3.15345	2.99195	3.15386	3.34585	3.0729	-0.272942
1619	CG13282	-0.279553	0.376546	0.632577	-0.0299376	0.0484962	0.30132	0.252823
1620	CG13284	4.57681	4.59407	4.76005	5.05906	4.58544	4.90956	0.32412
1621	CG13285	2.26009	2.19153	2.60167	1.94206	2.22581	2.27187	0.0460582
1622	CG13287	0.817815	0.999318	0.757818	0.671969	0.908567	0.714894	-0.193673
1623	CG13293	3.89777	3.92278	3.40201	3.61423	3.91027	3.50812	-0.402155
1624	CG13295	3.64362	3.28688	3.52401	3.42325	3.46525	3.47363	0.00838479
1625	CG13300	5.01549	5.1031	4.90416	4.59552	5.0593	4.74984	-0.309459
1626	CG13311	0.803291	1.36622	2.77877	1.53151	1.08476	2.15514	1.07038
1627	CG13312	-0.0168531	-0.270569	0.823534	1.15768	-0.143711	0.990609	1.13432
1628	CG13314	3.25923	3.08812	3.02161	3.47175	3.17367	3.24668	0.0730047
1629	CG13315	7.14652	7.56894	7.67891	7.34798	7.35773	7.51345	0.155712
1630	CG13318	0.262461	1.23117	1.14146	0.984254	0.746816	1.06286	0.316043
1631	CG13319	4.1972	4.17494	4.30023	4.45733	4.18607	4.37878	0.192715
1632	CG13321	6.14523	6.38005	6.63573	6.87152	6.26264	6.75363	0.49099
1633	CG13323	6.81986	7.64845	6.96104	6.25609	7.23415	6.60857	-0.625586
1634	CG13324	2.42253	4.23177	3.9347	2.91086	3.32715	3.42278	0.0956299
1635	CG13325	-0.420709	-0.849328	1.1912	0.317793	-0.635018	0.754497	1.38951
1636	CG13326	3.78869	3.45272	3.40836	3.62451	3.6207	3.51644	-0.104267
1637	CG13330	3.29757	2.84879	3.04318	3.43495	3.07318	3.23906	0.165885
1638	CG13334	2.38693	2.06698	2.10733	2.08757	2.22696	2.09745	-0.129507
1639	CG13337	4.68347	4.12885	3.99916	3.819	4.40616	3.90908	-0.49708
1640	CG13339	2.94087	2.76811	2.75511	2.74587	2.85449	2.75049	-0.104
1641	CG13344	3.88657	3.5988	3.98261	4.41309	3.74269	4.19785	0.455166
1642	CG13359	2.39434	1.8964	1.53987	1.74446	2.14537	1.64217	-0.503202
1643	CG13360	6.09386	6.42375	6.2786	5.99933	6.25881	6.13896	-0.119842
1644	CG13364	5.9929	5.90657	6.12895	6.32095	5.94973	6.22495	0.275216
1645	CG13365	3.07752	2.92948	3.35323	3.17116	3.0035	3.2622	0.258699
1646	CG13367	4.67595	4.73532	4.65688	4.83674	4.70563	4.74681	0.0411785
1647	CG13369	4.1412	4.19196	4.0805	4.13089	4.16658	4.10569	-0.0608848
1648	CG13373	2.4151	2.47351	2.75499	2.86495	2.44431	2.80997	0.365664
1649	CG13375	1.23955	2.07128	1.21661	1.10971	1.65541	1.16316	-0.492251
1650	CG13377	5.50055	5.57683	5.84245	5.92677	5.53869	5.88461	0.345924
1651	CG13380	2.48028	2.39747	2.65875	2.64898	2.43888	2.65387	0.214989
1652	CG13384	6.01757	5.69281	5.43268	5.07732	5.85519	5.255	-0.60019
1653	CG13385	2.88497	2.57886	2.41408	2.09785	2.73191	2.25597	-0.475947
1654	CG13390	2.92587	2.62811	2.75619	3.0056	2.77699	2.8809	0.103909
1655	CG13392	2.1681	1.71912	1.86129	1.69131	1.94361	1.7763	-0.167309
1656	CG13397	4.13669	4.50986	4.30161	4.1588	4.32327	4.23021	-0.0930653
1657	CG13398	4.13306	4.19805	4.12634	4.01428	4.16556	4.07031	-0.0952438
1658	CG13403	4.82568	5.31418	6.51596	6.55938	5.06993	6.53767	1.46774
1659	CG13404	0.524555	1.00717	0.383663	0.763913	0.765861	0.573788	-0.192074
1660	CG13405	3.19834	2.62216	2.70773	2.6174	2.91025	2.66256	-0.247686
1661	CG13408	0.0819837	0.188171	-0.55709	-1.21784	0.135077	-0.887465	-1.02254
1662	CG13409	1.75916	1.56699	1.66652	1.44692	1.66308	1.55672	-0.106358
1663	CG13423	1.71446	1.22941	2.04561	2.04946	1.47193	2.04753	0.575597
1664	CG13426	0.812408	0.375377	0.52607	0.634146	0.593892	0.580108	-0.0137844
1665	CG13430	2.48859	2.49973	2.3909	2.24353	2.49416	2.31722	-0.176943
1666	CG13436	3.96321	3.57181	3.4806	3.2025	3.76751	3.34155	-0.425959
1667	CG1344	5.75895	5.80972	5.81182	5.46007	5.78433	5.63595	-0.148387
1668	CG13442	4.16764	3.88711	3.74401	3.64553	4.02738	3.69477	-0.332604
1669	CG13449	2.96204	2.78174	2.5779	2.37117	2.87189	2.47453	-0.397359
1670	CG13455	3.85287	3.53555	3.5557	3.77626	3.69421	3.66598	-0.0282259
1671	CG13457	4.25854	4.01027	3.73	3.34727	4.13441	3.53863	-0.595772
1672	CG13458	1.17354	1.14041	0.755632	0.997453	1.15698	0.876543	-0.280435
1673	CG13460	6.94131	7.62224	7.30929	7.45226	7.28177	7.38078	0.0990033
1674	CG13461	-0.566954	1.11113	2.91195	2.73485	0.272088	2.8234	2.55131
1675	CG13471	3.18604	2.71725	2.66584	2.5056	2.95164	2.58572	-0.365924
1676	CG13473	1.6808	0.856593	0.190759	-0.212959	1.2687	-0.0111003	-1.2798
1677	CG13476	3.88215	3.54464	3.00835	2.0321	3.7134	2.52023	-1.19317
1678	CG13481	3.14761	2.46508	2.55047	2.35912	2.80635	2.4548	-0.351553
1679	CG13482	5.44876	5.0732	5.60633	5.33982	5.26098	5.47308	0.212094
1680	CG13484	2.71791	2.77568	2.90951	2.32256	2.7468	2.61604	-0.130763
1681	CG13488	1.65095	1.27552	1.42932	1.39296	1.46323	1.41114	-0.0520947
1682	CG13492	5.8456	6.76025	6.69281	6.31377	6.30292	6.50329	0.200365
1683	CG13494	1.2961	0.936266	1.07572	0.61748	1.11618	0.846599	-0.269584
1684	CG13501	3.1147	2.56888	2.3631	2.52474	2.84179	2.44392	-0.397867
1685	CG13506	5.60448	5.78899	5.47875	5.31081	5.69674	5.39478	-0.301952
1686	CG13510	6.7588	6.98204	7.18571	7.29396	6.87042	7.23984	0.369419
1687	CG13511	0.510935	0.914626	-0.358016	1.51631	0.712781	0.579145	-0.133636
1688	CG13516	4.0316	3.74552	3.89633	3.82647	3.88856	3.8614	-0.0271581
1689	CG13526	1.57697	0.643824	0.424119	0.329851	1.1104	0.376985	-0.733411
1690	CG13527	2.2569	2.13323	1.74147	1.40522	2.19507	1.57335	-0.621718
1691	CG13531	6.5557	6.62525	6.60397	6.43449	6.59047	6.51923	-0.0712453
1692	CG13532	3.15243	3.11287	2.69764	2.64176	3.13265	2.6697	-0.462951
1693	CG13538	2.23463	1.74631	1.63266	1.47603	1.99047	1.55434	-0.436127
1694	CG13539	2.20831	1.80801	1.81717	1.87094	2.00816	1.84405	-0.164106
1695	CG1354	6.52145	6.5936	6.76466	7.05377	6.55753	6.90922	0.35169
1696	CG13540	2.19218	2.00439	2.59734	2.40675	2.09828	2.50204	0.403759
1697	CG13544	3.98829	3.60767	3.44544	3.10917	3.79798	3.27731	-0.520677
1698	CG13545	0.0481797	0.683417	0.989288	1.86759	0.365798	1.42844	1.06264
1699	CG13551	8.5315	8.39243	8.70593	8.7754	8.46197	8.74067	0.278701
1700	CG13558	0.346605	0.00279554	0.480908	0.685253	0.1747	0.583081	0.40838
1701	CG13560	-0.117284	-0.0407621	3.42611	3.88617	-0.0790232	3.65614	3.73516
1702	CG13562	0.515041	1.01158	-0.108532	0.416094	0.763312	0.153781	-0.609531
1703	CG13563	-0.243803	0.0469785	0.571591	0.644991	-0.0984125	0.608291	0.706704
1704	CG13564	0.584463	0.445291	0.583286	0.0136901	0.514877	0.298488	-0.216389
1705	CG13575	1.86119	1.60065	1.45297	1.90726	1.73092	1.68011	-0.0508092
1706	CG13577	2.7554	2.65292	2.85279	3.16952	2.70416	3.01115	0.306994
1707	CG13579	0.844173	0.893575	0.0627184	0.524043	0.868874	0.293381	-0.575493
1708	CG1358	3.52065	3.64519	3.50086	3.81397	3.58292	3.65741	0.0744979
1709	CG13581	2.75147	2.278	1.638	1.5169	2.51474	1.57745	-0.93729
1710	CG13585	6.00445	6.25525	6.34328	6.36447	6.12985	6.35388	0.224027
1711	CG13594	3.06311	2.93055	3.48087	3.59689	2.99683	3.53888	0.54205
1712	CG13599	2.68695	2.7007	2.52463	2.36245	2.69382	2.44354	-0.250288
1713	CG1360	2.47911	2.34139	2.31346	2.20439	2.41025	2.25892	-0.151325
1714	CG13601	3.69851	3.58434	3.784	4.00064	3.64143	3.89232	0.250893
1715	CG13603	6.05063	5.78815	6.04956	6.00375	5.91939	6.02666	0.107271
1716	CG13605	5.26504	5.20422	5.40581	5.58105	5.23463	5.49343	0.258798
1717	CG13606	8.0091	4.90518	6.26536	4.15622	6.45714	5.21079	-1.24635
1718	CG13607	6.37581	6.6352	6.39672	6.71588	6.50551	6.5563	0.0507975
1719	CG13609	1.3804	1.54137	1.4495	1.01369	1.46088	1.2316	-0.229288
1720	CG13618	2.2665	1.90095	1.27377	1.42574	2.08373	1.34976	-0.733967
1721	CG13623	3.07371	2.88052	2.94838	3.10911	2.97712	3.02874	0.0516264
1722	CG13625	4.20565	4.13814	4.27399	4.30291	4.17189	4.28845	0.116557
1723	CG13630	4.85355	4.98158	5.1969	5.39162	4.91756	5.29426	0.376697
1724	CG13631	4.31278	4.10296	4.45076	4.67385	4.20787	4.56231	0.354438
1725	CG13639	2.72928	1.20707	2.0814	1.88148	1.96817	1.98144	0.0132657
1726	CG13641	4.86298	5.39944	6.24092	6.21458	5.13121	6.22775	1.09654
1727	CG13654	3.37482	3.65921	3.21591	3.25483	3.51701	3.23537	-0.281645
1728	CG13658	2.2429	2.12081	2.10673	1.30742	2.18186	1.70708	-0.474779
1729	CG13659	2.75463	2.90539	2.95134	2.53641	2.83001	2.74388	-0.0861355
1730	CG13663	3.64181	3.55902	3.95846	3.60801	3.60042	3.78324	0.182818
1731	CG13667	3.92853	3.57202	3.90018	3.58784	3.75028	3.74401	-0.00626428
1732	CG13671	3.62579	3.7293	3.79027	3.7661	3.67754	3.77818	0.100642
1733	CG13675	-0.450643	-0.51015	0.819775	0.496571	-0.480396	0.658173	1.13857
1734	CG13676	7.73506	7.84575	7.55677	7.90455	7.7904	7.73066	-0.0597448
1735	CG13678	1.47541	2.04008	2.68157	2.62079	1.75774	2.65118	0.893439
1736	CG1368	3.48212	4.65219	3.61721	4.04509	4.06716	3.83115	-0.23601
1737	CG13685	1.87935	1.76062	1.82834	0.874301	1.81998	1.35132	-0.468664
1738	CG13689	2.88458	2.70432	2.70026	2.54518	2.79445	2.62272	-0.17173
1739	CG13690	2.37721	2.55375	2.94629	2.68936	2.46548	2.81782	0.352344
1740	CG13693	3.46144	2.83372	2.77537	2.07798	3.14758	2.42668	-0.720905
1741	CG13694	0.0131406	0.414259	0.311548	-0.283599	0.2137	0.0139741	-0.199725
1742	CG13698	5.33329	5.16221	5.21014	5.05065	5.24775	5.1304	-0.117355
1743	CG13700	4.23926	3.996	3.97988	3.66409	4.11763	3.82198	-0.295649
1744	CG13707	3.22045	3.08623	3.46826	3.278	3.15334	3.37313	0.219791
1745	CG13708	0.257697	0.347409	0.0334385	-0.217036	0.302553	-0.0917989	-0.394352
1746	CG1371	6.37858	6.47718	6.50412	6.46846	6.42788	6.48629	0.0584109
1747	CG13722	7.69451	8.18862	7.14538	7.88219	7.94157	7.51378	-0.427783
1748	CG13723	1.33885	0.582473	0.792297	0.670078	0.960663	0.731188	-0.229475
1749	CG13725	2.87417	2.4697	2.2672	1.6763	2.67194	1.97175	-0.700181
1750	CG13731	8.96497	9.57829	9.46842	10.1529	9.27163	9.81066	0.539025
1751	CG13733	3.9065	3.38833	3.56013	3.68252	3.64742	3.62133	-0.0260898
1752	CG13739	0.643809	0.639973	0.1299	-0.599248	0.641891	-0.234674	-0.876565
1753	CG13742	2.003	2.34211	2.04491	1.62962	2.17256	1.83727	-0.335288
1754	CG13743	0.697538	1.38906	0.951722	0.578882	1.0433	0.765302	-0.277997
1755	CG13747	4.0411	3.6546	3.65258	3.63481	3.84785	3.6437	-0.204149
1756	CG13748	2.21708	1.17321	0.836511	1.40498	1.69515	1.12075	-0.574398
1757	CG13751	4.73273	4.52338	4.96382	5.03513	4.62806	4.99947	0.371414
1758	CG13760	3.0052	2.81498	2.88721	3.12681	2.91009	3.00701	0.0969269
1759	CG13766	2.87552	2.94631	2.85898	2.57338	2.91092	2.71618	-0.194738
1760	CG13771	0.930652	0.230278	1.18283	0.78105	0.580465	0.981941	0.401476
1761	CG13775	1.27884	1.70565	1.9581	1.53934	1.49225	1.74872	0.256475
1762	CG13784	7.16992	6.9375	6.85884	6.72858	7.05371	6.79371	-0.26
1763	CG13795	4.18527	4.93423	5.06015	4.63507	4.55975	4.84761	0.287861
1764	CG13796	6.92623	6.9334	7.16188	6.97205	6.92981	7.06697	0.137155
1765	CG13801	1.28227	0.599779	0.784447	0.845129	0.941026	0.814788	-0.126238
1766	CG13806	3.39734	4.10773	3.62433	3.46963	3.75253	3.54698	-0.205551
1767	CG13807	3.55816	3.37816	3.70134	4.23101	3.46816	3.96617	0.498012
1768	CG13810	1.71471	1.85663	1.62341	1.23279	1.78567	1.4281	-0.357572
1769	CG13813	1.12933	1.18672	1.34474	1.7687	1.15802	1.55672	0.398695
1770	CG13829	1.81092	0.981695	2.07396	1.82323	1.39631	1.94859	0.552286
1771	CG13833	0.668888	0.78895	1.02961	1.98891	0.728919	1.50926	0.780343
1772	CG13838	1.28701	0.865148	0.658786	1.03552	1.07608	0.847154	-0.228924
1773	CG13843	3.05454	2.59585	2.05118	2.12908	2.8252	2.09013	-0.735068
1774	CG13847	0.077806	0.56532	-0.082934	0.26608	0.321563	0.091573	-0.22999
1775	CG13850	3.82284	3.81744	4.06703	3.91617	3.82014	3.9916	0.171462
1776	CG13855	3.2023	2.81284	2.57828	2.32929	3.00757	2.45378	-0.553792
1777	CG13856	2.53757	2.35659	2.74827	3.35312	2.44708	3.0507	0.603621
1778	CG13868	6.9897	7.1967	6.92262	7.10947	7.0932	7.01605	-0.0771534
1779	CG1387	4.19588	4.0759	4.0116	4.21191	4.13589	4.11176	-0.0241323
1780	CG13870	3.55326	3.08126	2.91436	2.78461	3.31726	2.84948	-0.46778
1781	CG13871	3.23638	2.68878	3.097	2.97946	2.96258	3.03823	0.0756511
1782	CG13872	3.38933	2.79928	2.40681	2.25816	3.0943	2.33249	-0.761819
1783	CG13875	0.741387	0.409175	0.739647	0.310188	0.575281	0.524917	-0.0503636
1784	CG13876	3.33705	3.20973	2.95082	2.64769	3.27339	2.79926	-0.474135
1785	CG13877	-1.29136	0.414665	0.950911	0.953948	-0.438347	0.952429	1.39078
1786	CG13884	2.00248	1.6735	1.73322	1.54405	1.83799	1.63864	-0.199352
1787	CG13887	7.95504	7.94338	8.06188	8.02773	7.94921	8.04481	0.0955937
1788	CG13891	1.84055	1.80853	0.991951	1.22139	1.82454	1.10667	-0.71787
1789	CG13893	7.76184	7.84559	7.99685	8.01474	7.80372	8.0058	0.20208
1790	CG13894	2.50532	2.47156	2.08862	1.94795	2.48844	2.01828	-0.470157
1791	CG13895	4.21438	4.35068	4.14592	4.19552	4.28253	4.17072	-0.111808
1792	CG13896	3.09729	3.05638	3.04811	3.1428	3.07684	3.09545	0.0186172
1793	CG13898	4.20759	3.89273	3.15505	3.02694	4.05016	3.09099	-0.959169
1794	CG13901	4.4333	4.07547	4.40802	4.56518	4.25438	4.4866	0.232216
1795	CG13907	8.08681	7.68855	7.42999	7.38841	7.88768	7.4092	-0.47848
1796	CG13912	3.54412	4.1035	4.18639	4.62625	3.82381	4.40632	0.582506
1797	CG13917	6.9816	6.95734	7.01264	7.00675	6.96947	7.0097	0.0402274
1798	CG13919	1.8512	1.65083	1.98852	1.89521	1.75102	1.94187	0.190848
1799	CG13920	3.99775	4.10064	4.0521	3.83399	4.04919	3.94305	-0.106147
1800	CG13921	4.61573	4.53305	4.29477	4.67029	4.57439	4.48253	-0.0918613
1801	CG13924	-0.245473	-0.774463	0.867935	0.67749	-0.509968	0.772712	1.28268
1802	CG13926	3.3337	3.33611	3.5414	3.57759	3.33491	3.55949	0.224583
1803	CG13928	6.71306	6.75117	6.43378	6.38946	6.73212	6.41162	-0.320495
1804	CG13933	5.45922	5.65716	5.4233	5.53755	5.55819	5.48043	-0.0777651
1805	CG13937	2.00564	2.18145	2.059	2.29246	2.09355	2.17573	0.0821827
1806	CG1394	5.42845	5.08879	5.0052	4.91912	5.25862	4.96216	-0.29646
1807	CG13947	2.05445	0.993634	3.73447	2.14239	1.52404	2.93843	1.41439
1808	CG13949	1.70678	1.04424	1.51488	1.62769	1.37551	1.57128	0.195776
1809	CG13950	1.40742	1.822	1.59497	1.93103	1.61471	1.763	0.148291
1810	CG13954	1.46262	1.52068	0.59376	1.02993	1.49165	0.811844	-0.679808
1811	CG13962	5.96865	6.0531	6.90447	6.38604	6.01088	6.64526	0.63438
1812	CG13978	5.04596	4.71535	4.46867	3.98213	4.88065	4.2254	-0.655248
1813	CG13982	0.37292	0.14011	-0.554649	-1.30734	0.256515	-0.930997	-1.18751
1814	CG13984	1.01769	0.361766	0.388183	0.0427744	0.68973	0.215479	-0.474251
1815	CG13989	2.98231	2.59966	2.66862	2.82597	2.79099	2.7473	-0.0436935
1816	CG13991	5.25357	4.81072	4.88187	5.19363	5.03214	5.03775	0.00560733
1817	CG13994	4.3421	4.15121	4.39019	4.29464	4.24666	4.34241	0.0957566
1818	CG13995	1.56496	1.97204	0.991053	1.34409	1.7685	1.16757	-0.600926
1819	CG13999	1.06052	0.817889	0.481168	0.770381	0.939204	0.625775	-0.313429
1820	CG14000	1.68412	1.56951	0.818334	0.723806	1.62681	0.77107	-0.855744
1821	CG14005	2.84967	2.69557	2.81791	3.09175	2.77262	2.95483	0.182206
1822	CG14006	3.19591	2.78249	2.40727	1.9539	2.9892	2.18058	-0.808616
1823	CG14011	3.48854	3.04975	3.06467	3.29094	3.26915	3.17781	-0.0913407
1824	CG14013	2.67178	2.44161	2.3353	2.15178	2.55669	2.24354	-0.313154
1825	CG14015	1.51376	1.31047	0.866792	0.897692	1.41212	0.882242	-0.529875
1826	CG14017	2.25455	2.26357	1.80704	1.58185	2.25906	1.69444	-0.564615
1827	CG14020	1.30611	1.29389	1.67454	1.92035	1.3	1.79745	0.497445
1828	CG14022	1.16923	0.780763	0.696569	0.713044	0.974997	0.704807	-0.27019
1829	CG14024	2.40669	2.1911	2.13039	2.23454	2.29889	2.18246	-0.116429
1830	CG14036	1.00594	1.07186	1.52387	1.43464	1.0389	1.47925	0.440353
1831	CG14042	2.45602	2.55321	2.44251	2.76151	2.50462	2.60201	0.0973925
1832	CG14043	5.11632	4.97254	5.15654	5.17895	5.04443	5.16775	0.123316
1833	CG14050	1.74911	1.18952	1.19402	1.38454	1.46931	1.28928	-0.180034
1834	CG14053	2.55916	2.25177	1.86783	1.85336	2.40547	1.86059	-0.544875
1835	CG14054	1.89419	1.7019	1.99736	2.34762	1.79804	2.17249	0.374445
1836	CG1407	5.60813	5.44207	5.44964	5.36516	5.5251	5.4074	-0.117697
1837	CG14070	2.59531	2.05233	2.42293	2.35179	2.32382	2.38736	0.0635376
1838	CG14071	2.31189	1.59724	1.69042	1.15411	1.95457	1.42227	-0.532303
1839	CG14072	0.35249	0.264423	0.421574	-0.188392	0.308457	0.116591	-0.191866
1840	CG14073	6.71699	6.81593	6.67031	6.73494	6.76646	6.70262	-0.0638359
1841	CG14074	2.0482	1.89969	1.82154	1.97965	1.97395	1.90059	-0.0733512
1842	CG14075	1.87152	1.43797	1.66292	2.08504	1.65475	1.87398	0.21923
1843	CG14079	0.462704	0.431008	-0.231585	0.950838	0.446856	0.359626	-0.0872299
1844	CG14082	0.578615	0.571973	0.448456	0.429999	0.575294	0.439228	-0.136066
1845	CG1409	0.611859	0.362898	-0.213193	-0.00807402	0.487378	-0.110634	-0.598012
1846	CG14100	2.89103	2.82277	2.99984	2.87995	2.8569	2.93989	0.0829963
1847	CG14102	1.86083	2.20699	2.10069	1.58085	2.03391	1.84077	-0.19314
1848	CG14104	1.94189	2.02751	2.12166	1.78871	1.9847	1.95519	-0.0295121
1849	CG14106	1.77794	1.60459	1.31196	1.48083	1.69127	1.39639	-0.294872
1850	CG14109	6.16885	5.65724	6.19059	6.71448	5.91305	6.45253	0.539487
1851	CG14113	3.41317	3.27379	3.06307	2.43722	3.34348	2.75015	-0.593333
1852	CG14118	2.19792	2.2714	3.08045	3.27324	2.23466	3.17684	0.94218
1853	CG14120	5.13174	5.24603	4.84301	4.62299	5.18888	4.733	-0.455884
1854	CG14130	2.67065	2.62951	2.59854	2.44445	2.65008	2.5215	-0.128582
1855	CG14131	5.3229	5.5551	5.79361	5.79281	5.439	5.79321	0.354209
1856	CG14132	4.92935	4.48569	5.07335	5.16838	4.70752	5.12087	0.413343
1857	CG14135	3.42694	3.05876	3.13744	2.26341	3.24285	2.70043	-0.54242
1858	CG14151	2.05525	1.73736	1.59809	1.30958	1.89631	1.45383	-0.442472
1859	CG14154	3.73672	3.06291	3.01309	3.15315	3.39981	3.08312	-0.316696
1860	CG1416	6.43944	6.38437	6.56426	6.25194	6.41191	6.4081	-0.00380576
1861	CG14160	2.12857	2.49837	2.23063	1.39341	2.31347	1.81202	-0.501447
1862	CG14174	2.72566	2.52932	2.53206	2.81096	2.62749	2.67151	0.0440214
1863	CG1418	4.86698	4.72834	4.83737	4.59086	4.79766	4.71411	-0.0835451
1864	CG14182	2.79358	2.99111	3.14393	3.56854	2.89234	3.35624	0.463892
1865	CG14183	4.94896	4.41142	4.42895	4.29241	4.68019	4.36068	-0.319513
1866	CG14186	2.01833	2.08156	1.66251	1.36337	2.04994	1.51294	-0.537009
1867	CG14190	2.66588	2.59959	3.03487	3.06894	2.63274	3.05191	0.419171
1868	CG14191	-1.24109	0.148719	0.261704	0.265387	-0.546185	0.263545	0.809731
1869	CG14194	6.09439	5.85177	5.99522	6.14497	5.97308	6.0701	0.0970185
1870	CG14195	3.04183	3.41835	3.09416	3.43162	3.23009	3.26289	0.0327969
1871	CG14196	1.3828	2.15138	2.5281	2.6538	1.76709	2.59095	0.823854
1872	CG14200	6.01425	6.2591	6.07905	6.41687	6.13667	6.24796	0.111284
1873	CG14205	2.8325	-0.95424	0.32087	-2.09142	0.939132	-0.885275	-1.82441
1874	CG14207	9.62357	9.51972	9.67491	9.90711	9.57164	9.79101	0.219368
1875	CG1421	1.24819	1.12769	0.862605	0.222342	1.18794	0.542473	-0.645469
1876	CG14210	2.84086	2.65702	3.11387	2.87294	2.74894	2.9934	0.24446
1877	CG14212	1.13375	0.504662	0.828239	0.969136	0.819205	0.898687	0.0794823
1878	CG14219	0.0786103	0.227315	-2.29863	-1.44345	0.152963	-1.87104	-2.024
1879	CG14220	4.32905	4.07388	4.44516	4.86475	4.20146	4.65495	0.453491
1880	CG14223	4.0149	4.19893	4.18194	4.40339	4.10692	4.29266	0.185746
1881	CG14229	3.76522	3.70389	3.5388	3.7409	3.73455	3.63985	-0.094702
1882	CG14230	3.56727	3.72223	3.79833	4.32423	3.64475	4.06128	0.416527
1883	CG14232	4.50739	4.36722	4.48017	5.02676	4.43731	4.75346	0.316157
1884	CG14234	2.82416	2.98455	2.3555	2.48876	2.90435	2.42213	-0.482224
1885	CG14245	1.22615	1.70813	2.38256	1.82129	1.46714	2.10192	0.63478
1886	CG14247	1.60525	1.6856	2.0675	1.17527	1.64542	1.62139	-0.0240375
1887	CG14252	3.23804	3.05074	3.15186	3.04835	3.14439	3.1001	-0.0442907
1888	CG14253	5.25456	5.03859	4.89338	4.82311	5.14657	4.85824	-0.288331
1889	CG14257	2.69966	2.27344	2.23302	2.27736	2.48655	2.25519	-0.231354
1890	CG14258	6.13896	6.20329	6.65707	6.7749	6.17112	6.71598	0.544861
1891	CG14260	0.879387	0.701499	0.448985	0.587815	0.790443	0.5184	-0.272043
1892	CG14262	2.2126	1.81866	1.31429	1.54302	2.01563	1.42866	-0.586976
1893	CG14265	6.67061	7.10519	6.4734	6.2151	6.8879	6.34425	-0.543651
1894	CG14269	1.85157	1.48964	1.32344	1.84895	1.6706	1.58619	-0.0844119
1895	CG14270	3.54925	3.18917	3.75545	3.73731	3.36921	3.74638	0.377172
1896	CG14273	1.95985	1.57181	1.40843	0.903458	1.76583	1.15594	-0.609887
1897	CG14275	4.57203	4.44327	4.71476	4.78816	4.50765	4.75146	0.243812
1898	CG14277	2.10677	2.25647	2.08482	2.32549	2.18162	2.20516	0.0235367
1899	CG1428	2.75975	2.28052	2.697	2.8956	2.52014	2.7963	0.276163
1900	CG14280	0.215781	0.424632	0.197446	0.265142	0.320207	0.231294	-0.0889126
1901	CG14282	2.99987	2.54747	2.48244	2.69503	2.77367	2.58874	-0.18493
1902	CG14285	3.04387	3.27077	3.34882	3.74843	3.15732	3.54863	0.391307
1903	CG14286	3.07168	2.87163	3.25821	3.12674	2.97166	3.19247	0.220817
1904	CG14292	3.06944	3.81213	3.60115	2.54419	3.44079	3.07267	-0.368113
1905	CG14294	1.88865	1.36481	1.57172	1.07523	1.62673	1.32348	-0.303256
1906	CG14297	4.12784	3.85355	3.69729	3.49379	3.99069	3.59554	-0.395152
1907	CG14300	7.21012	7.74701	7.21637	7.05492	7.47857	7.13564	-0.342923
1908	CG14301	3.01448	2.94241	2.72784	2.51268	2.97845	2.62026	-0.35819
1909	CG14302	8.02157	8.28344	7.90322	7.62701	8.15251	7.76511	-0.387393
1910	CG14304	2.77859	3.19003	2.38553	2.41962	2.98431	2.40257	-0.58174
1911	CG14305	4.64964	4.41283	4.23665	4.17117	4.53124	4.20391	-0.327329
1912	CG14312	0.778162	0.993296	1.06557	1.25528	0.885729	1.16043	0.274697
1913	CG14314	2.79061	2.60171	3.1373	3.29239	2.69616	3.21484	0.518679
1914	CG14316	3.64831	3.3524	3.13312	2.41169	3.50036	2.7724	-0.727957
1915	CG14321	1.85653	1.85217	1.56352	1.36721	1.85435	1.46536	-0.388984
1916	CG14322	4.73653	5.01997	4.74572	4.45105	4.87825	4.59838	-0.279868
1917	CG14332	6.57647	6.89327	7.13475	7.02186	6.73487	7.07831	0.343436
1918	CG14339	2.30243	1.82571	1.73769	1.60345	2.06407	1.67057	-0.393496
1919	CG1434	3.10399	3.15484	3.06706	3.18833	3.12942	3.12769	-0.00172368
1920	CG14341	3.34177	3.34377	3.49062	3.8396	3.34277	3.66511	0.32234
1921	CG14346	2.16486	2.13908	2.52692	2.73718	2.15197	2.63205	0.480079
1922	CG14352	2.47367	2.40212	2.48386	2.8292	2.4379	2.65653	0.21863
1923	CG14354	2.61364	2.52099	1.90483	1.95126	2.56732	1.92804	-0.639271
1924	CG14355	6.11918	5.75502	5.56015	5.47119	5.9371	5.51567	-0.421429
1925	CG14356	1.50447	2.09348	2.46614	2.55585	1.79898	2.51099	0.712019
1926	CG14362	1.88503	1.43749	1.66183	1.43563	1.66126	1.54873	-0.112525
1927	CG14370	2.06598	1.6586	1.6595	1.55572	1.86229	1.60761	-0.254682
1928	CG14380	2.01291	1.16949	1.35582	0.896627	1.5912	1.12622	-0.46498
1929	CG14383	2.85778	2.4579	2.07553	1.93033	2.65784	2.00293	-0.65491
1930	CG14384	2.49048	2.60261	2.71955	2.39373	2.54655	2.55664	0.0100916
1931	CG14391	2.45481	2.13221	2.02715	1.37227	2.29351	1.69971	-0.593801
1932	CG1440	7.25771	7.00263	7.19748	7.17134	7.13017	7.18441	0.0542403
1933	CG14401	4.48377	4.20805	4.72245	4.98817	4.34591	4.85531	0.509402
1934	CG14402	2.53273	1.98878	2.404	2.10137	2.26076	2.25268	-0.0080757
1935	CG14406	3.01747	3.94033	4.41202	5.47425	3.4789	4.94314	1.46424
1936	CG14408	3.9125	4.19814	4.05057	4.18619	4.05532	4.11838	0.0630618
1937	CG14411	5.87028	6.02266	6.03664	6.31016	5.94647	6.1734	0.226925
1938	CG14414	3.51925	3.43959	3.6363	3.82668	3.47942	3.73149	0.252068
1939	CG14431	1.76387	1.7768	0.356945	0.614947	1.77033	0.485946	-1.28439
1940	CG14434	3.80024	3.54364	3.96296	4.21223	3.67194	4.0876	0.415655
1941	CG14435	6.48068	6.50348	6.49125	6.61695	6.49208	6.5541	0.0620198
1942	CG14439	5.73468	5.4819	5.45728	5.67553	5.60829	5.5664	-0.0418843
1943	CG14440	4.97592	4.96717	4.82592	4.81447	4.97155	4.8202	-0.15135
1944	CG14441	4.1631	4.26803	4.01869	4.10552	4.21556	4.0621	-0.153461
1945	CG14442	6.04142	6.32736	6.13405	6.24505	6.18439	6.18955	0.00515904
1946	CG14443	-0.924335	-1.05369	0.156424	0.791378	-0.989015	0.473901	1.46292
1947	CG14445	0.586952	0.800082	0.449419	1.23586	0.693517	0.842638	0.149122
1948	CG14448	2.78944	2.17161	2.36032	2.2145	2.48053	2.28741	-0.193118
1949	CG14450	3.05896	2.87713	3.01718	3.18447	2.96805	3.10083	0.132781
1950	CG14456	3.3119	3.27762	3.39147	3.49884	3.29476	3.44516	0.150397
1951	CG14457	1.41106	1.37652	0.771949	0.92669	1.39379	0.84932	-0.544472
1952	CG14464	5.18662	5.14712	5.35315	4.51282	5.16687	4.93299	-0.233883
1953	CG14478	6.94693	6.97696	6.70157	6.77177	6.96195	6.73667	-0.225273
1954	CG14480	5.06669	4.93252	4.96741	5.27344	4.9996	5.12042	0.120824
1955	CG14483	4.1863	4.2327	4.55793	4.27551	4.2095	4.41672	0.207217
1956	CG14488	3.26199	2.93882	2.83572	2.49028	3.1004	2.663	-0.437402
1957	CG14495	1.81184	1.48418	1.65431	0.596111	1.64801	1.12521	-0.522799
1958	CG14500	5.29837	5.9221	5.92317	5.79382	5.61024	5.8585	0.248259
1959	CG14505	1.26564	0.537712	0.371758	0.392244	0.901677	0.382001	-0.519676
1960	CG14506	1.65263	1.40254	1.89595	1.17332	1.52759	1.53464	0.00704989
1961	CG14511	2.50853	2.74432	2.41081	2.51757	2.62642	2.46419	-0.162235
1962	CG14535	2.67913	2.76853	2.48616	2.14515	2.72383	2.31565	-0.408178
1963	CG14537	1.97608	1.41577	1.43515	1.84952	1.69592	1.64233	-0.0535912
1964	CG14540	5.75973	5.41324	5.19817	5.23344	5.58649	5.21581	-0.370678
1965	CG14543	3.0001	2.76814	3.29566	3.20247	2.88412	3.24907	0.364949
1966	CG14544	2.35679	2.19639	2.33167	2.43583	2.27659	2.38375	0.10716
1967	CG14546	2.77622	2.57738	2.20356	2.02398	2.6768	2.11377	-0.563025
1968	CG14556	2.58707	2.18877	2.06248	1.45018	2.38792	1.75633	-0.631593
1969	CG14561	3.18636	3.09822	3.42209	3.58551	3.14229	3.5038	0.361512
1970	CG14562	5.03712	5.23248	5.0516	5.13835	5.1348	5.09498	-0.0398217
1971	CG14564	-0.737375	-0.0983973	0.215514	0.734652	-0.417886	0.475083	0.892969
1972	CG14566	4.21801	4.93142	5.20452	5.6085	4.57471	5.40651	0.831794
1973	CG14567	4.42742	3.84486	3.02487	4.301	4.13614	3.66293	-0.473204
1974	CG14570	1.01413	1.14959	0.624725	0.143086	1.08186	0.383906	-0.697953
1975	CG14572	5.32183	5.02131	4.96345	5.36565	5.17157	5.16455	-0.00702488
1976	CG14589	3.85723	3.42628	3.55064	3.52465	3.64175	3.53764	-0.104111
1977	CG14591	2.49014	2.29451	2.49425	2.29132	2.39233	2.39278	0.000458987
1978	CG14598	1.71623	1.39197	1.54595	1.48509	1.5541	1.51552	-0.0385839
1979	CG14605	3.53201	2.99717	2.88894	2.52546	3.26459	2.7072	-0.557389
1980	CG14606	1.29743	1.83292	1.40208	1.08522	1.56517	1.24365	-0.321525
1981	CG14609	4.42084	4.16884	3.81785	3.42886	4.29484	3.62336	-0.671484
1982	CG14613	4.31877	4.37216	4.44216	4.45794	4.34547	4.45005	0.104587
1983	CG14615	0.832498	0.998677	1.23599	0.878895	0.915588	1.05744	0.141853
1984	CG14618	2.98577	2.95407	2.95404	3.01145	2.96992	2.98275	0.0128271
1985	CG14621	4.65817	4.48471	4.60592	4.54452	4.57144	4.57522	0.00377599
1986	CG14628	1.48027	1.4827	2.12575	2.03811	1.48149	2.08193	0.600443
1987	CG14629	7.99459	8.00716	8.17797	8.66309	8.00087	8.42053	0.419659
1988	CG1463	3.91857	3.83806	4.03337	3.76859	3.87832	3.90098	0.0226612
1989	CG14630	2.60996	2.98051	3.4102	3.65389	2.79523	3.53204	0.73681
1990	CG14631	0.831358	0.647449	1.02899	1.0061	0.739403	1.01754	0.278139
1991	CG14636	3.10783	2.7792	3.14367	3.4206	2.94352	3.28213	0.338619
1992	CG14641	5.72914	5.60918	5.86511	5.89816	5.66916	5.88163	0.212471
1993	CG14642	3.85761	3.72926	3.93613	4.19457	3.79344	4.06535	0.271909
1994	CG14644	2.94582	2.32714	2.48309	2.21	2.63648	2.34655	-0.289932
1995	CG14646	4.92384	5.01385	4.8449	4.80509	4.96885	4.82499	-0.143855
1996	CG14647	4.47215	4.37783	4.69269	4.5519	4.42499	4.62229	0.197302
1997	CG14650	6.05539	6.10853	6.04176	6.06329	6.08196	6.05252	-0.0294386
1998	CG14655	2.32417	2.53309	2.00643	2.12286	2.42863	2.06464	-0.363983
1999	CG14657	5.3755	5.62926	5.43655	5.52183	5.50238	5.47919	-0.0231917
[truncated: 9,748 more rows]

## Sheet: GSEA.GO.BP
	ID	Description	setSize	enrichmentScore	NES	pvalue	p.adjust	qvalue	rank	leading_edge	core_enrichment
262	GO:1903688	positive regulation of border follicle cell migration	40	-0.524355	-1.68652	0.00462941	0.049934	0.042444	4021	tags=65%, list=34%, signal=43%	Pi3K92E/par-1/Cbl/Egfr/grk/zip/ttk/kis/shg/spi/hep/Akt/Pvf1/puc/Rme-8/chico/vn/spri/Pvr/Krn/bsk/kuz/mbc/InR/aop/slbo
260	GO:0065004	protein-DNA complex assembly	64	0.496428	1.77035	0.00451173	0.0488767	0.0415452	3252	tags=53%, list=28%, signal=39%	His2A:CG33808/Rpt4R/Polr1E/His2A:CG33832/His2A:CG33835/His2A:CG33838/His2A:CG33841/His2A:CG33844/His2A:CG33847/His2A:CG33850/His2A:CG33862/His2A:CG33865/BigH1/Taf9/cid/spn-A/NC2beta/His3.3A/TfIIA-S/M1BP/Taf11/dup/HipHop/Tfb5/CG8223/Taf12/Chrac-14/Rpt4/Caf1-180/Set/Taf6/CG5815/TfIIB/His4r
261	GO:0048085	adult chitin-containing cuticle pigmentation	14	-0.692335	-1.71655	0.00451409	0.0488767	0.0415452	777	tags=21%, list=7%, signal=20%	ple/e/y
259	GO:0008355	olfactory learning	43	-0.518809	-1.69674	0.00445361	0.0485942	0.0413052	3617	tags=58%, list=31%, signal=40%	Egfr/Atx2/Nf1/AGO1/spi/drl/rut/chico/vn/Krn/Fas2/Nmdar1/gish/sgg/Pka-C1/rg/Gad1/dnc/Syn/Alk/Dop1R1/rad/Oamb/futsch/Rdl
253	GO:0006026	aminoglycan catabolic process	26	0.620505	1.80909	0.00435966	0.0484645	0.0411949	1574	tags=38%, list=13%, signal=33%	PGRP-SC1a/PGRP-SC1b/PGRP-SC2/Idgf5/PGRP-SA/Idgf6/Idgf4/Sgsh/PGRP-LB/Cht2
258	GO:0090130	tissue migration	178	-0.355781	-1.47273	0.00435908	0.0484645	0.0411949	4186	tags=54%, list=36%, signal=35%	Dl/pbl/sosie/CG42674/Dhc64C/hop/Pi3K92E/btl/msn/dlp/par-1/mys/Mrtf/cup/Cbl/sqd/Ppcs/bnl/CalpB/Egfr/spoon/AdamTS-A/baz/Sin3A/grk/htl/18w/Rap1/ru/ab/par-6/zip/ptc/knrl/Ced-12/mim/ttk/Rala/tj/sli/kis/shg/nudE/spi/GMF/ex/hep/BicC/Stat92E/dally/csw/byn/CASK/jing/Akt/mthl1/kibra/sr/if/Pvf1/stumps/puc/Rme-8/robo2/chico/Lar/vn/spri/bbg/Pvr/sgl/sl/Crk/Krn/N/dysf/rhea/sfl/pnt/bsk/kuz/stai/fz/pyr/robo1/mbc/…
257	GO:0016079	synaptic vesicle exocytosis	60	-0.474937	-1.66337	0.00442057	0.0484645	0.0411949	2719	tags=37%, list=23%, signal=28%	CASK/mop/Chc/Sec10/GABA-B-R2/Syngr/Rab3/NFAT/nSyb/Rph/Syx4/Syn/Sytbeta/Syt4/brp/Cadps/Fife/cpx/Rim/Snap25/unc-13/Syt7
255	GO:0018230	peptidyl-L-cysteine S-palmitoylation	19	-0.647745	-1.73069	0.00442457	0.0484645	0.0411949	2061	tags=53%, list=18%, signal=43%	CG18810/CG17196/CG17287/CG10344/CG13029/CG17075/CG17197/CG4956/CG17195/CG17198
256	GO:0018231	peptidyl-S-diacylglycerol-L-cysteine biosynthetic process from peptidyl-cysteine	19	-0.647745	-1.73069	0.00442457	0.0484645	0.0411949	2061	tags=53%, list=18%, signal=43%	CG18810/CG17196/CG17287/CG10344/CG13029/CG17075/CG17197/CG4956/CG17195/CG17198
254	GO:0007400	neuroblast fate determination	18	-0.66478	-1.74634	0.0043901	0.0484645	0.0411949	2471	tags=50%, list=21%, signal=40%	abd-A/vnd/N/kuz/brat/sc/mam/spen/Kr
252	GO:0050906	detection of stimulus involved in sensory perception	42	-0.514767	-1.67983	0.00431639	0.0484053	0.0411446	1270	tags=45%, list=11%, signal=40%	TrpA1/pain/TkR99D/hmw/stj/Dscam1/Or2a/Ir40a/Gr64e/OtopLa/CG15270/norpA/ATP8B/cac/inaC/Gr64a/Gr64c/Ir76a/Or45b
251	GO:0022618	protein-RNA complex assembly	115	0.414607	1.61271	0.00425067	0.0479415	0.0407503	3138	tags=45%, list=27%, signal=33%	RpS5b/CG6220/CG10993/RpS19b/CG3294/CG6999/eIF2D/CG32706/RpS14a/RpS19a/RpS14b/SmE/DENR/Smn/CG40813/icln/CG9107/eIF3a/CG41562/SNRPG/Mrm2/Hsp83/SmD3/RpLP0/Prp18/Secp43/SmF/RpS5a/RpL6/rept/Non3/CG12320/pont/MCTS1/eIF2gamma/Prp31/RpS15/RpL23A/CG9667/SmD2/eIF6/Nle/RpL10/CG7564/RpS28b/sta/snRNP-U1-C/CG7488/CG17768/eIF2beta/p23/hyx
250	GO:0050773	regulation of dendrite development	49	-0.513145	-1.73648	0.00425807	0.0479415	0.0407503	3181	tags=45%, list=27%, signal=33%	Nedd4/nudE/babos/Hecw/kat-60L1/Akt/vvl/rictor/cv-c/fra/comm/G9a/tutl/kn/mav/Pten/robo1/Dscam1/unc-104/dar1/CadN/Ret
242	GO:0006754	ATP biosynthetic process	25	0.625938	1.82773	0.00403212	0.0464458	0.039479	2456	tags=76%, list=21%, signal=60%	ATPsynepsilonL/ATPsynbetaL/ATPsynF/ATPsynG/ATPsynO/ATPsynD/ATPsynB/ATPsyngamma/ATPsynE/sesB/ATPsynCF6/CLS/ATPsyndelta/blw/ATPsynbeta/Scox/sun/Datp/CG3337
243	GO:0046034	ATP metabolic process	32	0.596402	1.82396	0.00408787	0.0464458	0.039479	2456	tags=62%, list=21%, signal=50%	ATPsynepsilonL/ATPsynbetaL/ATPsynF/ATPsynG/ATPsynO/ATPsynD/ATPsynB/ATPsyngamma/ATPsynE/sesB/ATPsynCF6/CLS/ATPsyndelta/blw/Fign/ATPsynbeta/Scox/sun/Datp/CG3337
244	GO:0070972	protein localization to endoplasmic reticulum	34	0.569906	1.77588	0.00405137	0.0464458	0.039479	3635	tags=62%, list=31%, signal=43%	TRAM/SrpRalpha/Spase12/Srp14/CG1598/Srp54k/Spase22-23/CG5885/ttm50/Sec61gamma/Sec61alpha/CG7215/Srp68/Srp19/Sec61beta/Spase25/KdelR/Srp72/Sgt/SrpRbeta/CG8860
246	GO:0022904	respiratory electron transport chain	95	0.445963	1.69081	0.00405629	0.0464458	0.039479	1762	tags=47%, list=15%, signal=41%	ND-B12/COX5A/ND-B18/COX4/cype/ND-30/UQCR-14/CG7630/Cyt-c1L/SdhC/ND-PDSW/UQCR-C2/ND-B14/CIA30/levy/ND-B14.5B/COX7C/ND-18/ND-ASHI/ND-B14.7/ND-B17/ND-MNLL/COX5B/UQCR-6.4/CG9034/COX7A/dj-1beta/ND-39/RFeSP/ND-20/ND-75/SdhD/UQCR-Q/ND-ACP/CG11752/NP15.6/Cyt-c1/ND-42/ND-15/ND-13A/ND-B15/ND-B14.5A/COX8/ND-19/ND-B17.2
249	GO:0019752	carboxylic acid metabolic process	357	0.311106	1.4054	0.00409236	0.0464458	0.039479	2193	tags=30%, list=19%, signal=25%	Daao2/CG4830/Acbp4/Acbp5/arg/Odc1/CG6415/Fatp3/FASN2/AcCoAS/FASN1/Gapdh1/CG3699/Gcat/Tpi/Had1/Pgd/Odc2/CG31075/Srr/Pglym78/Ddc/scu/Acsf2/CG4586/Dhpr/Sardh/KFase/Gapdh2/Sdhaf3/Cbs/Acbp2/Mdh1/Ldh/adp/Ald1/Acbp3/Etfb/Pdhb/Mcad/CG11241/Pgk/Ass/Eno/tzn/CG8097/CG17109/Argl/Gip/CG10748/CG6726/CG10184/Oscillin/Echs1/P5cr-2/CG10623/Ech1/beg/dj-1beta/Acat1/CG17110/CG44242/Elovl7/CG16904/ry/CG10621/Pgi/CG51…
248	GO:0051124	synaptic assembly at neuromuscular junction	142	-0.392859	-1.58157	0.00400655	0.0464458	0.039479	3896	tags=48%, list=33%, signal=32%	SkpA/spartin/par-1/cup/pum/wnd/hiw/Tor/dbo/Syp/Nf1/Cul2/beta-Spec/LanA/htl/Rab8/repo/Ank2/Prosap/kis/nmo/CG42638/Trpml/alpha-Spec/trio/Dad/Nlg1/dlg1/CASK/Akt/Imp/Src42A/Ten-m/Lar/rictor/Nrx-1/Fak/Syn1/Syn2/ewg/Src64B/Fas2/scb/S6k/CaMKII/sgg/Ten-a/brat/stai/metro/Liprin-gamma/Itgbn/PIP5K59B/stj/Syx4/Syn/ena/Galphao/plum/jeb/Octbeta1R/unc-104/cac/Nlg2/cpx/nwk/futsch/dysc
247	GO:0046578	regulation of Ras protein signal transduction	79	-0.443813	-1.6242	0.00407321	0.0464458	0.039479	4085	tags=47%, list=35%, signal=31%	CG42674/dos/CG43658/CG15611/Lztr1/CG3630/CG9098/raskol/Pura/Sbf/Nf1/step/trio/Slmap/tor/Sur-8/RhoGAP1A/Exn/CG4853/RhoGEF2/Crag/spri/CG30440/cv-c/CG2113/Epac/CG43102/RhoGEF3/mbc/Ziz/sty/Zir/CG5937/PsGEF/CG34393/Rab3-GEF/RhoGAP100F
245	GO:0014016	neuroblast differentiation	41	-0.524666	-1.70144	0.00403719	0.0464458	0.039479	4324	tags=63%, list=37%, signal=40%	osa/insc/Dl/wg/ems/mid/jigr1/sqz/p53/nkd/nab/D/abd-A/CG9650/vnd/N/svp/pdm2/kuz/brat/Antp/sc/mam/spen/pros/Kr
241	GO:0015980	energy derivation by oxidation of organic compounds	188	0.369725	1.55114	0.00384572	0.0452055	0.0384248	2570	tags=43%, list=22%, signal=34%	Ilp2/ATPsynepsilonL/ATPsynbetaL/FASN1/ND-B12/COX5A/ND-B18/COX4/ATPsynF/cype/Mdh1/ND-30/ATPsynO/UQCR-14/CG7630/Cyt-c1L/SdhC/ND-PDSW/UQCR-C2/ND-20L/ND-B14/CIA30/levy/ND-B14.5B/COX7C/fh/ND-18/ND-ASHI/GlyP/ND-B14.7/CG10748/ND-B17/ND-MNLL/COX5B/UQCR-6.4/CG9034/COX7A/dj-1beta/Scsalpha1/ND-39/RFeSP/Pgm1/ND-20/ND-75/SdhD/UQCR-Q/AGBE/Idh3a/ND-ACP/CG11752/ATPCL/NP15.6/Irp-1A/Cyt-c1/CG5214/ND-42/ND-15/ND-13…
240	GO:0007613	memory	119	-0.397644	-1.56668	0.00373043	0.0452055	0.0384248	3818	tags=52%, list=33%, signal=36%	pum/Dop2R/teq/wnd/ss/CenG1A/hiw/spoon/Atx2/Su(H)/Nf1/Tomosyn/orb2/aPKC/Tob/Ank2/kis/be/ebo/Rbfox1/Gba1b/drl/Stat92E/pxb/CASK/HDAC4/rut/CRMP/dbr/meng/mura/eas/Ptp10D/Src64B/Inx7/Fas2/N/Appl/scb/dikar/Nmdar1/CaMKII/bsk/Pka-C1/rg/G9a/dnc/Syn/Gba1a/mol/5-HT1A/mil/klg/Tbh/Dop1R1/Nipped-B/brp/rad/Nmdar2/2mit/mGluR/armi
239	GO:0051961	negative regulation of nervous system development	86	-0.446628	-1.65603	0.00382769	0.0452055	0.0384248	4055	tags=52%, list=35%, signal=35%	Lrrk/btl/SkpA/spartin/Ythdf/aos/hiw/dbo/sd/Syp/ana/Nf1/LanA/Spn/ed/Sema2b/Dad/tws/Akt/kibra/Sema1b/Src42A/Sema5c/Fak/ewg/Src64B/N/scb/Sema2a/sgg/brat/Liprin-gamma/Itgbn/stj/hdc/l(2)gl/ena/Galphao/plum/Octbeta1R/Sema1a/pros/unc-104/CadN/nwk
238	GO:0070286	axonemal dynein complex assembly	25	-0.599604	-1.71597	0.00372995	0.0452055	0.0384248	1579	tags=32%, list=13%, signal=28%	CG10839/HEATR2/Dnali1/CG5048/CG6980/CG31294/CG8800/kl-3
237	GO:0007638	mechanosensory behavior	14	-0.697592	-1.72958	0.00385511	0.0452055	0.0384248	2483	tags=64%, list=21%, signal=51%	TrpA1/pain/eas/Piezo/tutl/jus/btv/Pzl/para
231	GO:0071867	response to monoamine	13	-0.723963	-1.76672	0.00382322	0.0452055	0.0384248	1192	tags=62%, list=10%, signal=55%	5-HT1A/Dop1R1/Dop1R2/5-HT1B/5-HT7/Ets96B/CG17760/Sh
232	GO:0071868	cellular response to monoamine stimulus	13	-0.723963	-1.76672	0.00382322	0.0452055	0.0384248	1192	tags=62%, list=10%, signal=55%	5-HT1A/Dop1R1/Dop1R2/5-HT1B/5-HT7/Ets96B/CG17760/Sh
233	GO:0071869	response to catecholamine	13	-0.723963	-1.76672	0.00382322	0.0452055	0.0384248	1192	tags=62%, list=10%, signal=55%	5-HT1A/Dop1R1/Dop1R2/5-HT1B/5-HT7/Ets96B/CG17760/Sh
234	GO:0071870	cellular response to catecholamine stimulus	13	-0.723963	-1.76672	0.00382322	0.0452055	0.0384248	1192	tags=62%, list=10%, signal=55%	5-HT1A/Dop1R1/Dop1R2/5-HT1B/5-HT7/Ets96B/CG17760/Sh
235	GO:1903350	response to dopamine	13	-0.723963	-1.76672	0.00382322	0.0452055	0.0384248	1192	tags=62%, list=10%, signal=55%	5-HT1A/Dop1R1/Dop1R2/5-HT1B/5-HT7/Ets96B/CG17760/Sh
236	GO:1903351	cellular response to dopamine	13	-0.723963	-1.76672	0.00382322	0.0452055	0.0384248	1192	tags=62%, list=10%, signal=55%	5-HT1A/Dop1R1/Dop1R2/5-HT1B/5-HT7/Ets96B/CG17760/Sh
230	GO:0048598	embryonic morphogenesis	222	-0.347324	-1.4903	0.00363157	0.0446209	0.0379279	4052	tags=48%, list=34%, signal=32%	Mbs/hop/put/Gprk2/Gbeta13F/sna/msn/rho/mys/pum/tup/Dab/PhKgamma/Dok/srp/Egfr/Mtl/baz/Pkn/htl/POSH/pyd/Mcr/Rap1/par-6/aPKC/zip/Ack-like/ed/knk/step/sli/Dr/Traf4/shg/spi/drm/crb/hid/sala/hep/cno/fkh/LanB1/Dad/trh/byn/Rac2/dlg1/Nrx-IV/tsh/smash/mthl1/sr/Dtg/CG41099/tor/Pvf1/stumps/sinu/puc/Src42A/5-HT2A/cora/abd-A/yrt/jumu/RhoGEF2/cta/run/scyl/emc/cv-c/Mmp1/Pvr/sgl/N/svp/scb/rhea/alpha-Cat/sfl/pnt/r…
229	GO:0045466	R7 cell differentiation	64	-0.477241	-1.6834	0.00352886	0.0435483	0.0370161	4216	tags=55%, list=36%, signal=35%	rau/Dl/seq/dos/mask/Cbl/Dab/ss/Rap1/lola/cdi/phyl/ttk/RasGAP1/csw/E(spl)mdelta-HLH/Src42A/Ten-m/Lar/bdl/emc/sl/Src64B/N/pnt/tutl/spg/rl/aop/CadN2/klg/sv/pros/CadN/RhoGAP100F
228	GO:0035220	wing disc development	382	-0.312233	-1.41507	0.00349815	0.0433587	0.0368549	4459	tags=51%, list=38%, signal=33%	tok/cic/dve/nuf/px/ara/Ilk/arr/how/puf/fog/msk/elB/osa/Fhos/ebi/tara/Rab7/hui/d/boi/tkv/fbl/Nup154/Dl/Dys/vg/wg/dap/Mbs/hop/put/Gprk2/Asx/in/bs/svr/dom/dlp/Arf6/frtz/eyg/rho/Galphas/par-1/mys/Mrtf/cg/tup/Cbl/Notum/Dok/pygo/S6kII/Skp2/fj/Ppcs/aos/unk/Egfr/ap/Mkp3/fry/disco-r/Mtl/Su(H)/sbb/sd/Sin3A/Cul3/lgs/grk/sca/disp/Pkn/pyd/Rap1/ltl/CG5890/ab/zip/Mrp4/ptc/Nedd4/ed/Drak/nab/smo/hyd/step/fz2/Smox…
227	GO:0034728	nucleosome organization	34	0.576673	1.79696	0.00347555	0.0432683	0.0367781	736	tags=32%, list=6%, signal=30%	His2A:CG33808/His2A:CG33832/His2A:CG33835/His2A:CG33838/His2A:CG33841/His2A:CG33844/His2A:CG33847/His2A:CG33850/His2A:CG33862/His2A:CG33865/BigH1
222	GO:0006352	DNA-templated transcription initiation	79	0.472376	1.74273	0.00345748	0.0432644	0.0367748	3488	tags=51%, list=30%, signal=36%	Taf12L/nht/aly/Rpt4R/sa/Polr1E/CycH/Taf9/TfIIEalpha/Sec13/SC35/NC2beta/Tfb4/mtTFB1/Xpd/TfIIA-S/x16/M1BP/can/Taf11/Mat1/Tfb1/Taf10/Tfb5/Polr2I/Srp54/TfIIFalpha/mrn/Ssb-c31a/Taf10b/Taf12/MED16/Rpt4/Taf6/B52/TfIIB/TfIIA-L/Trf/TfIIFbeta/Ssl1
223	GO:0042773	ATP synthesis coupled electron transport	90	0.459683	1.73711	0.00345993	0.0432644	0.0367748	1762	tags=50%, list=15%, signal=43%	ND-B12/COX5A/ND-B18/COX4/cype/ND-30/UQCR-14/CG7630/Cyt-c1L/SdhC/ND-PDSW/UQCR-C2/ND-B14/CIA30/levy/ND-B14.5B/COX7C/ND-18/ND-ASHI/ND-B14.7/ND-B17/ND-MNLL/COX5B/UQCR-6.4/CG9034/COX7A/dj-1beta/ND-39/RFeSP/ND-20/ND-75/SdhD/UQCR-Q/ND-ACP/CG11752/NP15.6/Cyt-c1/ND-42/ND-15/ND-13A/ND-B15/ND-B14.5A/COX8/ND-19/ND-B17.2
224	GO:0042775	mitochondrial ATP synthesis coupled electron transport	90	0.459683	1.73711	0.00345993	0.0432644	0.0367748	1762	tags=50%, list=15%, signal=43%	ND-B12/COX5A/ND-B18/COX4/cype/ND-30/UQCR-14/CG7630/Cyt-c1L/SdhC/ND-PDSW/UQCR-C2/ND-B14/CIA30/levy/ND-B14.5B/COX7C/ND-18/ND-ASHI/ND-B14.7/ND-B17/ND-MNLL/COX5B/UQCR-6.4/CG9034/COX7A/dj-1beta/ND-39/RFeSP/ND-20/ND-75/SdhD/UQCR-Q/ND-ACP/CG11752/NP15.6/Cyt-c1/ND-42/ND-15/ND-13A/ND-B15/ND-B14.5A/COX8/ND-19/ND-B17.2
226	GO:0120035	regulation of plasma membrane bounded cell projection organization	157	-0.369352	-1.50582	0.00343173	0.0432644	0.0367748	3636	tags=43%, list=31%, signal=30%	ss/fry/Cep97/mas/Tor/baz/lola/par-6/aPKC/Ror/Nedd4/C1GalTA/Sema2b/fz2/Nrk/pico/nudE/babos/hep/Hecw/trio/DAAM/Rac2/kat-60L1/LRP1/Akt/Sema1b/Imp/Klp59D/kon/vvl/Lar/rictor/Sema5c/RhoGEF2/RhoGAPp190/cv-c/Kr-h1/fra/NetB/N/comm/S6k/Sema2a/CaMKII/PlexA/G9a/tutl/kn/mav/fz/Pten/Trim9/robo1/ena/Dscam1/stan/Ddr/PsGEF/Sema1a/PlexB/pros/unc-104/dar1/CadN/sif/kug/Ret
225	GO:1903684	regulation of border follicle cell migration	42	-0.52048	-1.69847	0.00345972	0.0432644	0.0367748	4021	tags=64%, list=34%, signal=42%	Pi3K92E/msn/par-1/Cbl/Egfr/grk/zip/ttk/kis/shg/spi/hep/Akt/Pvf1/puc/Rme-8/chico/vn/spri/Pvr/Krn/bsk/kuz/mbc/InR/aop/slbo
220	GO:0071826	protein-RNA complex organization	119	0.413534	1.61574	0.00324815	0.0416206	0.0353776	3138	tags=45%, list=27%, signal=33%	RpS5b/CG6220/CG10993/RpS19b/CG3294/CG6999/eIF2D/CG32706/RpS14a/RpS19a/RpS14b/SmE/DENR/Smn/CG40813/icln/CG9107/eIF3a/CG41562/SNRPG/Mrm2/Hsp83/SmD3/RpLP0/Prp18/Secp43/SmF/RpS5a/RpL6/rept/Non3/CG12320/pont/MCTS1/eIF2gamma/Prp31/RpS15/RpL23A/CG9667/SmD2/eIF6/Nle/RpL10/CG17187/CG7564/RpS28b/sta/snRNP-U1-C/CG7488/CG17768/eIF2beta/p23/hyx
221	GO:0040008	regulation of growth	311	-0.326736	-1.44666	0.00325483	0.0416206	0.0353776	3920	tags=44%, list=33%, signal=30%	dlp/SkpA/spartin/sima/cup/Lk6/pum/Ythdf/CG9328/RNaseZ/Wnt5/wnd/Egfr/hiw/p53/Tor/Mnt/dbo/sbb/Syp/Nf1/Cul2/beta-Spec/LanA/htl/Rassf/TSG101/Rab8/Sema2b/Ank2/step/Smox/kis/pico/Ire1/shg/Hipk/nmo/Nos/crb/hid/ex/slif/CG42638/Trpml/alpha-Spec/trio/fkh/Dad/ft/Hs6st/dally/dlg1/CASK/mop/Akt/Tl/kibra/Sema1b/Chc/tor/pip/Src42A/chico/Lar/babo/rictor/Sema5c/srl/brk/scyl/mirr/Fak/Syn1/Syn2/PIP4K/sl/ewg/Src64B/I…
219	GO:0009201	ribonucleoside triphosphate biosynthetic process	32	0.603831	1.84668	0.00321636	0.0415042	0.0352787	2456	tags=66%, list=21%, signal=52%	ATPsynepsilonL/ATPsynbetaL/ATPsynF/awd/ATPsynG/ATPsynO/ATPsynD/ATPsynB/ATPsyngamma/ATPsynE/ras/sesB/ATPsynCF6/CLS/ATPsyndelta/blw/ATPsynbeta/Scox/sun/Datp/CG3337
218	GO:0042063	gliogenesis	91	-0.431946	-1.62033	0.00318463	0.0412833	0.0350909	4382	tags=56%, list=37%, signal=35%	how/fog/wts/rau/Galphai/Dl/btl/kune/moody/Nrg/bnl/Nf1/htl/unc-5/repo/sli/Dr/retn/cno/pasi1/Ser/poe/Nrx-IV/jing/kibra/Pvf1/stumps/sinu/cora/Cont/bdl/orion/Pvf3/Pvr/fra/NetB/vnd/N/svp/Pvf2/gish/kuz/Mdr65/ey/pyr/spen/gcm2/Galphao/ths/sty/pros
217	GO:0010634	positive regulation of epithelial cell migration	41	-0.529138	-1.71594	0.0031707	0.0412833	0.0350909	4021	tags=66%, list=34%, signal=43%	Pi3K92E/par-1/Cbl/Egfr/grk/zip/ttk/kis/shg/spi/hep/Akt/Pvf1/puc/Rme-8/chico/vn/spri/Pvr/sl/Krn/bsk/kuz/mbc/InR/aop/slbo
216	GO:0042255	ribosome assembly	46	0.545761	1.84279	0.0031386	0.0410633	0.0349039	2860	tags=52%, list=24%, signal=40%	RpS5b/CG10993/RpS19b/CG6999/CG32706/RpS14a/RpS19a/RpS14b/CG40813/CG9107/CG41562/Mrm2/RpLP0/RpS5a/RpL6/Non3/CG7006/RpS15/RpL23A/eIF6/Nle/RpL10/RpS28b/sta
215	GO:0022900	electron transport chain	100	0.438567	1.68216	0.00310448	0.0408059	0.0346851	1920	tags=47%, list=16%, signal=40%	ND-B12/COX5A/ND-B18/COX4/cype/ND-30/UQCR-14/CG7630/Cyt-c1L/SdhC/ND-PDSW/UQCR-C2/ND-B14/CIA30/levy/ND-B14.5B/COX7C/ND-18/ND-ASHI/ND-B14.7/ND-B17/ND-MNLL/COX5B/UQCR-6.4/CG9034/COX7A/dj-1beta/ND-39/RFeSP/ND-20/ND-75/SdhD/UQCR-Q/ND-ACP/CG11752/NP15.6/Cyt-c1/ND-42/ND-15/ND-13A/ND-B15/ND-B14.5A/COX8/ND-19/ND-B17.2/SdhB/blw
212	GO:0000028	ribosomal small subunit assembly	20	0.694404	1.88482	0.00304234	0.0404811	0.034409	1338	tags=55%, list=11%, signal=49%	RpS5b/CG10993/RpS19b/CG6999/CG32706/RpS14a/RpS19a/RpS14b/CG40813/CG9107/CG41562
213	GO:1903825	organic acid transmembrane transport	70	-0.475604	-1.70692	0.00306545	0.0404811	0.034409	2595	tags=46%, list=22%, signal=36%	CG13743/CG32832/CG5254/Targ/CG5535/polyph/GC2/Dic2/mnd/Abcd1/Dic3/JhI-21/CG13248/CG8026/CG5646/CG32081/CG7888/Ntl/VGlut/CG13384/ChT/tadr/CG18418/CG12531/path/CG8785/sbm/CG9582/CG16700/Eaat2/CG7514/CG16736
214	GO:1905039	carboxylic acid transmembrane transport	70	-0.475604	-1.70692	0.00306545	0.0404811	0.034409	2595	tags=46%, list=22%, signal=36%	CG13743/CG32832/CG5254/Targ/CG5535/polyph/GC2/Dic2/mnd/Abcd1/Dic3/JhI-21/CG13248/CG8026/CG5646/CG32081/CG7888/Ntl/VGlut/CG13384/ChT/tadr/CG18418/CG12531/path/CG8785/sbm/CG9582/CG16700/Eaat2/CG7514/CG16736
211	GO:0046552	photoreceptor cell fate commitment	90	-0.436609	-1.63091	0.00293932	0.0393673	0.0334623	4035	tags=51%, list=34%, signal=34%	put/dos/rho/mask/Cbl/Dab/grh/Blimp-1/msi/Egfr/Rap1/lola/ru/cdi/phyl/oc/ttk/Rala/Smox/noc/RasGAP1/spi/br/csw/kibra/Src42A/babo/emc/sl/hth/Src64B/svp/pnt/amon/gl/ey/fz/spg/myo/l(2)gl/rl/aop/klg/Hr3/pros/Actbeta
210	GO:0001667	ameboidal-type cell migration	185	-0.366183	-1.53246	0.00286381	0.0390922	0.0332284	4186	tags=55%, list=36%, signal=36%	Dl/pbl/sosie/CG42674/Dhc64C/hop/Pi3K92E/Gbeta13F/btl/msn/dlp/par-1/mys/Mrtf/cup/Cbl/sqd/Ppcs/bnl/CalpB/Egfr/Mtl/spoon/AdamTS-A/baz/Sin3A/grk/htl/18w/Rap1/ru/ab/par-6/zip/ptc/knrl/Ced-12/mim/ttk/Rala/tj/sli/kis/shg/nudE/spi/GMF/ex/hep/BicC/Stat92E/dally/csw/byn/Rac2/CASK/jing/Akt/mthl1/kibra/sr/if/Pvf1/stumps/puc/Rme-8/robo2/chico/Lar/vn/cta/spri/bbg/Pvr/sgl/sl/Crk/Krn/N/dysf/rhea/sfl/pnt/bsk/kuz/…
208	GO:0007435	salivary gland morphogenesis	90	-0.437004	-1.63239	0.00290494	0.0390922	0.0332284	4384	tags=68%, list=37%, signal=43%	Eip74EF/fog/Btk/Dif/Fhos/dia/l(3)psg2/drosha/Strica/egl/PH4alphaSG1/eyg/rho/Cam/Trf2/srp/Wnt5/IP3K2/Itpr/Gyc76C/MED24/Mtl/AdamTS-A/zip/caps/fz2/trn/shg/crb/hid/lolal/br/drl/fkh/Ser/trh/h/Utx/Rac2/LanB2/if/Pvf1/Src42A/mew/Pvr/Src64B/Pvf2/Atg17/raw/drpr/fz/hdc/Wnt4/l(2)gl/rpr/betaTub85D/jeb/PH4alphaSG2/sigmar/pan/Drl-2
209	GO:0022612	gland morphogenesis	90	-0.437004	-1.63239	0.00290494	0.0390922	0.0332284	4384	tags=68%, list=37%, signal=43%	Eip74EF/fog/Btk/Dif/Fhos/dia/l(3)psg2/drosha/Strica/egl/PH4alphaSG1/eyg/rho/Cam/Trf2/srp/Wnt5/IP3K2/Itpr/Gyc76C/MED24/Mtl/AdamTS-A/zip/caps/fz2/trn/shg/crb/hid/lolal/br/drl/fkh/Ser/trh/h/Utx/Rac2/LanB2/if/Pvf1/Src42A/mew/Pvr/Src64B/Pvf2/Atg17/raw/drpr/fz/hdc/Wnt4/l(2)gl/rpr/betaTub85D/jeb/PH4alphaSG2/sigmar/pan/Drl-2
207	GO:0070593	dendrite self-avoidance	20	-0.639853	-1.74941	0.00290018	0.0390922	0.0332284	3598	tags=70%, list=31%, signal=49%	fry/ImpL2/Sema2b/Bsg/Cont/bdl/otk/Fas2/tutl/Dscam1/stan/PlexB/Dscam3/Dscam2
206	GO:0031110	regulation of microtubule polymerization or depolymerization	35	-0.574151	-1.77744	0.00289466	0.0390922	0.0332284	2993	tags=49%, list=25%, signal=36%	Apc/chb/CG15306/alpha-Spec/Eb1/mv/Jupiter/cnn/msps/stai/pigs/CG11298/Mst27D/dar1/CG32371/futsch/CG2955
205	GO:0048663	neuron fate commitment	103	-0.430227	-1.65813	0.0028077	0.0387052	0.0328995	4571	tags=59%, list=39%, signal=36%	PDZ-GEF/mts/Tao/Oli/dac/wts/elB/tkv/Dl/put/dos/mid/rho/mask/tup/Cbl/Dab/grh/Blimp-1/msi/Egfr/Rap1/lola/ru/cdi/phyl/Hey/oc/ttk/Rala/fz2/Smox/noc/RasGAP1/spi/br/csw/kibra/Src42A/babo/emc/sl/hth/Src64B/N/svp/pnt/amon/gl/ey/fz/spg/myo/l(2)gl/rl/mam/aop/klg/Hr3/pros/Actbeta
204	GO:0048588	developmental cell growth	78	-0.46123	-1.68686	0.00277915	0.0385972	0.0328077	3860	tags=51%, list=33%, signal=35%	cup/Nrg/Ythdf/Wnt5/wnd/Nf1/htl/Sema2b/Ank2/fz2/hep/Frl/DAAM/poe/rut/Sema1b/ItgaPS4/chico/Lar/Sema5c/bdl/spri/scb/Sema2a/bsk/Pka-C1/kuz/dnc/fz/ItgaPS5/Dscam1/InR/stan/CadN2/Sema1a/path/dar1/CadN/RhoGAP100F/Sh
203	GO:0007612	learning	65	-0.49528	-1.75957	0.00278621	0.0385972	0.0328077	2857	tags=46%, list=24%, signal=35%	drl/Sap47/rut/chico/vn/Nrx-1/eas/Krn/Fas2/Nmdar1/gish/sgg/Pka-C1/rg/G9a/Gad1/dnc/Syn/Alk/Tbh/Dop1R1/AdoR/Nipped-B/DopEcR/rad/Oamb/futsch/Rdl/FoxP/mGluR
202	GO:0042127	regulation of cell population proliferation	359	-0.311108	-1.40076	0.00273396	0.0382484	0.0325112	3646	tags=37%, list=31%, signal=26%	bnl/ss/Egfr/Mkp3/fry/p53/Cep97/mas/Tor/Nup358/baz/sd/Sin3A/Cul3/ana/htl/Xrp1/lola/par-6/aPKC/Ror/Nedd4/C1GalTA/Sema2b/Rala/fz2/E(spl)m3-HLH/Prosap/Smox/Nrk/pico/nudE/Nos/spi/babos/mtd/crb/GMF/ex/hep/Hecw/trio/Stat92E/ft/pxb/tws/DAAM/Utx/Rac2/kat-60L1/LRP1/tsh/Akt/Tl/kibra/E(spl)mdelta-HLH/Sema1b/Imp/Pvf1/Klp59D/kon/chico/vvl/Lar/CG4793/babo/rictor/Sema5c/nub/vn/RhoGEF2/RhoGAPp190/cv-c/Kr-h1/Idgf2…
201	GO:0048732	gland development	185	-0.368488	-1.5421	0.00266744	0.0375034	0.0318779	4414	tags=59%, list=38%, signal=38%	Pen/Eip74EF/fog/Btk/Dif/Fhos/tkv/Nup98-96/dia/l(3)psg2/CG1129/wg/drosha/Strica/hop/put/egl/Pi3K92E/PH4alphaSG1/eyg/rho/mys/Cam/tup/Trf2/E2f1/srp/Wnt5/IP3K2/Itpr/Gyc76C/Egfr/MED24/Mtl/Tor/CrebA/AdamTS-A/Abd-B/htl/lola/unc-5/zip/caps/zfh1/fz2/sli/trn/CTPsyn/shg/crb/hid/retn/lolal/br/drl/fkh/Stat92E/Ser/trh/h/Utx/Rac2/LanB2/tsh/pnr/if/Pvf1/exd/Src42A/robo2/mew/Pvr/hth/Src64B/fra/NetB/N/scb/Pvf2/pnt/…
200	GO:0098754	detoxification	45	0.535764	1.80372	0.00262947	0.0371544	0.0315813	1366	tags=27%, list=12%, signal=24%	CG11893/Zip89B/MtnC/MtnE/Cyp6g1/Srxn/MtnB/Gclm/Prx6005/Sod2/Fdh/Sod1
199	GO:0007600	sensory perception	179	-0.374403	-1.55152	0.00261571	0.0371457	0.0315739	1929	tags=30%, list=16%, signal=25%	SKIP/dpr9/gl/hmw/dpr3/na/Galphaq/stj/CG8086/Gr93d/dpr19/btv/Ggamma30A/Galphao/Dyrk2/Dscam1/Or2a/Ir40a/Trh/ct/Gr64e/OtopLa/CG15270/dpr14/dpr6/Gr77a/norpA/dpr4/dpr13/rdgA/ATP8B/Dhc36C/dpr7/pros/dpr5/nrv3/cac/inaC/sif/dpr12/Nmdar2/dpr20/CheB42c/dpr10/dpr11/Gr39a/Gr64a/Gr64c/Sh/dpr8/Obp56i/Ir76a/Or45b
197	GO:0030490	maturation of SSU-rRNA	45	0.536255	1.80538	0.0025887	0.0371206	0.0315525	2880	tags=44%, list=25%, signal=34%	CG10993/CG6999/CG32706/RpS8/CG32409/CG40813/CG41562/RpS16/RpS21/CG14543/Sas10/CG2260/CG2972/hoip/ais/CG8064/CG7246/CG7728/RpS28b/CG11123
198	GO:0060560	developmental growth involved in morphogenesis	100	-0.423532	-1.62314	0.0026008	0.0371206	0.0315525	3878	tags=50%, list=33%, signal=34%	mys/Nrg/Ythdf/Dok/pygo/Wnt5/wnd/disco-r/Mtl/baz/LanA/18w/ttk/Sema2b/Ank2/fz2/Timp/shg/hep/Frl/Dad/Tollo/DAAM/Rac2/rut/Sema1b/Lar/Sema5c/RhoGEF2/spri/Mmp1/scb/Sema2a/bsk/Pka-C1/kuz/dnc/fz/Zyx/Dscam1/stan/CadN2/pan/Toll-6/Sema1a/path/dar1/CadN/RhoGAP100F/Sh
196	GO:0006836	neurotransmitter transport	123	-0.412196	-1.63097	0.00252947	0.0364708	0.0310003	2783	tags=34%, list=24%, signal=26%	Dyb/CarT/CASK/mop/Chc/Vmat/Rab3-GAP/Exn/Sec10/rogdi/GABA-B-R2/Syngr/sky/Rab3/NFAT/nSyb/Rph/Syx4/Syn/Sytalpha/CG43066/Sytbeta/VGAT/Sol1/Syt4/Ntl/Frq2/VGlut/CanB/brp/Cadps/CG10804/Fife/KaiR1D/cac/cpx/Rab3-GEF/Rim/Snap25/unc-13/Syt7/Frq1
195	GO:0048569	post-embryonic animal organ development	482	-0.29875	-1.38101	0.00240839	0.0349031	0.0296677	4459	tags=51%, list=38%, signal=33%	tok/dac/cic/dve/px/nsl1/ara/Ilk/arr/how/RhoGAP68F/stg/fog/msk/osa/Fhos/Cyp301a1/ebi/Kdm5/Alh/klar/d/tkv/Nup98-96/fbl/Ubx/sob/Dl/l(3)psg2/Dys/vg/CG1129/wg/dap/CG42674/Mbs/hop/put/Gprk2/Pi3K92E/Asx/Myo31DF/in/bs/CG43658/svr/msn/dlp/Arf6/frtz/rho/Galphas/par-1/mys/Mrtf/RhoGAP19D/cg/Nrg/RhoGAP54D/Cbl/Sp1/Dok/pygo/S6kII/E2f1/srp/nom/fj/Ppcs/aos/unk/ss/Gyc76C/Egfr/ap/Mkp3/fry/Mef2/disco-r/Mtl/Tor/Su(H)…
194	GO:1901136	carbohydrate derivative catabolic process	77	0.47243	1.73205	0.00235878	0.0343604	0.0292064	1164	tags=25%, list=10%, signal=22%	PGRP-SC1a/PGRP-SC1b/PGRP-SC2/NT5E-2/CG8353/Idgf5/CG11158/CG17065/Adgf-D/PGRP-SA/Adgf-C/Idgf6/dUTPase/veil/Idgf4/CG12177/Hexo1/Oscillin/Sgsh
191	GO:0009144	purine nucleoside triphosphate metabolic process	37	0.591667	1.88276	0.00226695	0.0331937	0.0282147	2456	tags=59%, list=21%, signal=47%	ATPsynepsilonL/ATPsynbetaL/ATPsynF/awd/ATPsynG/ATPsynO/ATPsynD/ATPsynB/ATPsyngamma/ATPsynE/ras/sesB/ATPsynCF6/CLS/ATPsyndelta/blw/Fign/ATPsynbeta/Scox/sun/Datp/CG3337
192	GO:0009199	ribonucleoside triphosphate metabolic process	39	0.578971	1.87948	0.00226257	0.0331937	0.0282147	2456	tags=56%, list=21%, signal=45%	ATPsynepsilonL/ATPsynbetaL/ATPsynF/awd/ATPsynG/ATPsynO/ATPsynD/ATPsynB/ATPsyngamma/ATPsynE/ras/sesB/ATPsynCF6/CLS/ATPsyndelta/blw/Fign/ATPsynbeta/Scox/sun/Datp/CG3337
193	GO:0048640	negative regulation of developmental growth	93	-0.446122	-1.68599	0.00226145	0.0331937	0.0282147	3587	tags=46%, list=31%, signal=32%	hiw/dbo/Syp/Nf1/LanA/TSG101/Sema2b/Ire1/crb/ex/fkh/Dad/ft/dlg1/Akt/Tl/kibra/Sema1b/tor/Src42A/Sema5c/Fak/ewg/Src64B/scb/Csk/Tace/Sema2a/sgg/Liprin-gamma/Itgbn/Pten/stj/l(2)gl/ena/Galphao/plum/Octbeta1R/Sema1a/Lgr3/CG10508/unc-104/nwk
190	GO:1900425	negative regulation of defense response to bacterium	35	0.610658	1.9235	0.00221535	0.0329504	0.0280079	554	tags=14%, list=5%, signal=14%	PGRP-SC1a/PGRP-SC1b/PGRP-SC2/bam/pirk
187	GO:0061060	negative regulation of peptidoglycan recognition protein signaling pathway	33	0.629223	1.94922	0.00214502	0.0320732	0.0272623	554	tags=15%, list=5%, signal=14%	PGRP-SC1a/PGRP-SC1b/PGRP-SC2/bam/pirk
188	GO:0006334	nucleosome assembly	24	0.678238	1.94566	0.00213778	0.0320732	0.0272623	736	tags=46%, list=6%, signal=43%	His2A:CG33808/His2A:CG33832/His2A:CG33835/His2A:CG33838/His2A:CG33841/His2A:CG33844/His2A:CG33847/His2A:CG33850/His2A:CG33862/His2A:CG33865/BigH1
189	GO:1990138	neuron projection extension	57	-0.503873	-1.74323	0.00213667	0.0320732	0.0272623	3140	tags=44%, list=27%, signal=32%	Sema2b/Ank2/fz2/hep/Frl/DAAM/rut/Sema1b/Lar/Sema5c/spri/Sema2a/bsk/kuz/dnc/fz/Dscam1/stan/CadN2/Sema1a/path/dar1/CadN/RhoGAP100F/Sh
183	GO:0009141	nucleoside triphosphate metabolic process	44	0.566984	1.89344	0.00208177	0.0317336	0.0269736	2456	tags=55%, list=21%, signal=43%	ATPsynepsilonL/ATPsynbetaL/ATPsynF/awd/ATPsynG/ATPsynO/ATPsynD/dUTPase/ATPsynB/ATPsyngamma/ATPsynE/ras/sesB/ATPsynCF6/CLS/ATPsyndelta/blw/CG5757/Fign/ATPsynbeta/Scox/sun/Datp/CG3337
184	GO:0006367	transcription initiation at RNA polymerase II promoter	64	0.518142	1.84779	0.00208862	0.0317336	0.0269736	4242	tags=72%, list=36%, signal=46%	Taf12L/nht/Rpt4R/sa/CycH/Taf9/TfIIEalpha/Sec13/SC35/NC2beta/Tfb4/Xpd/TfIIA-S/x16/M1BP/can/Taf11/Mat1/Tfb1/Taf10/Tfb5/Polr2I/Srp54/TfIIFalpha/mrn/Ssb-c31a/Taf10b/Taf12/MED16/Rpt4/Taf6/B52/TfIIB/TfIIA-L/Trf/TfIIFbeta/Ssl1/Rbp1/Polr2G/caz/ear/SF2/Taf2/Tbp/Taf8/Taf5
186	GO:0017156	calcium-ion regulated exocytosis	15	-0.712887	-1.80317	0.00206023	0.0317336	0.0269736	1762	tags=60%, list=15%, signal=51%	Rph/Sytalpha/Sytbeta/Syt4/Cadps/Fife/Rim/unc-13/Syt7
185	GO:0071241	cellular response to inorganic substance	18	-0.688327	-1.80819	0.00208573	0.0317336	0.0269736	1983	tags=56%, list=17%, signal=46%	bsk/PRL-1/Galphaq/rl/Sytalpha/uex/Ggamma30A/Sytbeta/Syt4/Syt7
182	GO:0008306	associative learning	53	-0.501651	-1.72294	0.00203454	0.0315913	0.0268527	3729	tags=60%, list=32%, signal=41%	S6kII/Egfr/Atx2/Nf1/AGO1/Shal/spi/drl/Sap47/rut/chico/vn/Nrx-1/eas/Krn/Fas2/Nmdar1/gish/sgg/Pka-C1/rg/Gad1/dnc/Syn/Alk/Dop1R1/AdoR/DopEcR/rad/Oamb/futsch/Rdl
181	GO:0019646	aerobic electron transport chain	82	0.481707	1.78647	0.00199434	0.0311381	0.0264675	1762	tags=54%, list=15%, signal=46%	ND-B12/COX5A/ND-B18/COX4/cype/ND-30/UQCR-14/CG7630/Cyt-c1L/SdhC/ND-PDSW/UQCR-C2/ND-B14/CIA30/levy/ND-B14.5B/COX7C/ND-18/ND-ASHI/ND-B14.7/ND-B17/ND-MNLL/COX5B/UQCR-6.4/CG9034/COX7A/ND-39/RFeSP/ND-20/ND-75/SdhD/UQCR-Q/ND-ACP/CG11752/NP15.6/Cyt-c1/ND-42/ND-15/ND-13A/ND-B15/ND-B14.5A/COX8/ND-19/ND-B17.2
180	GO:0009142	nucleoside triphosphate biosynthetic process	34	0.598681	1.86554	0.00197481	0.0310044	0.0263538	2456	tags=65%, list=21%, signal=51%	ATPsynepsilonL/ATPsynbetaL/ATPsynF/awd/ATPsynG/ATPsynO/ATPsynD/ATPsynB/ATPsyngamma/ATPsynE/ras/sesB/ATPsynCF6/CLS/ATPsyndelta/blw/CG5757/ATPsynbeta/Scox/sun/Datp/CG3337
179	GO:0016072	rRNA metabolic process	163	0.39762	1.62861	0.00195871	0.0309236	0.0262851	4115	tags=55%, list=35%, signal=36%	CG10993/Fib/CG6999/Polr1E/CG32706/RpL10Ab/RpS8/Rrp40/Rbm13/CG32409/CG40813/CG9107/CG11858/CG41562/RpS16/CG6833/RpS21/dbe/mtTFB1/CG14543/RpL7A/Sas10/CG11417/RpL35/RpL7/CG6712/Rrp42/CG2260/CG8939/rept/CG3527/CG3817/Non3/CG2972/RpS7/Rrp4/hoip/CG4038/Mettl5/ais/CG8064/eIF6/Nop60B/nop5/Ski6/CG7246/CG7728/Mtr4/RpS28b/LTV1/CG11123/Pop4/Rpt4/bys/CG10903/CG6937/Rrp45/CG14683/l(2)34Fd/nclb/NHP2/CG5800/RpLP…
178	GO:0006364	rRNA processing	145	0.407836	1.63649	0.00181084	0.0287496	0.0244372	4052	tags=55%, list=34%, signal=37%	CG10993/Fib/CG6999/CG32706/RpL10Ab/RpS8/Rrp40/Rbm13/CG32409/CG40813/CG9107/CG11858/CG41562/RpS16/CG6833/RpS21/dbe/mtTFB1/CG14543/RpL7A/Sas10/CG11417/RpL35/RpL7/CG6712/Rrp42/CG2260/CG8939/CG3527/CG3817/Non3/CG2972/RpS7/Rrp4/hoip/CG4038/Mettl5/ais/CG8064/eIF6/Nop60B/nop5/CG7246/CG7728/Mtr4/RpS28b/LTV1/CG11123/Pop4/bys/CG10903/CG6937/Rrp45/CG14683/l(2)34Fd/nclb/NHP2/CG5800/RpLP0-like/CG1785/Ip259/CG…
177	GO:0042752	regulation of circadian rhythm	90	-0.444886	-1.66183	0.0017019	0.0271727	0.0230968	1982	tags=30%, list=17%, signal=25%	sgg/Pka-C1/gl/na/Dh31/robo1/cwo/InR/5-HT1A/cue/Adar/Trh/Clk/Hk/Shab/Dop1R2/5-HT1B/norpA/Ets96B/Pdfr/hll/Cipc/eys/Oamb/Rdl/Sh/qvr
176	GO:0051240	positive regulation of multicellular organismal process	199	-0.375405	-1.58738	0.00159121	0.0258285	0.0219543	3713	tags=41%, list=32%, signal=29%	Wnt5/wnd/Itpr/Orcokinin/Sirt1/p53/Tor/Nf1/wake/htl/Rassf/aPKC/oc/Nedd4/repo/Ank2/step/E(spl)m3-HLH/Smox/Nca/kis/RasGAP1/Hipk/nudE/nmo/spi/CCAP/Acer/CG42638/Trpml/trio/dlg1/kat-60L1/mop/Akt/5-HT2A/hzg/chico/abd-A/babo/rictor/PIP4K/TkR99D/Ilp6/N/nerfin-1/Gbp1/PlexA/G9a/Sox102F/ey/fz/Dh31/pyr/rl/Proc/Zyx/wap/Crz/InR/stan/cue/Trh/sNPF/Cals/bun/Hk/Shab/sNPF-R/esg/PlexB/Ets96B/pros/cac/dar1/hll/Myc/sif…
175	GO:0051056	regulation of small GTPase mediated signal transduction	87	-0.45556	-1.69757	0.0016044	0.0258285	0.0219543	4085	tags=48%, list=35%, signal=32%	CG42674/dos/CG5521/CG43658/CG15611/RhoGAP54D/Lztr1/CG3630/CG9098/raskol/Pura/Sbf/Nf1/step/trio/Slmap/tor/Sur-8/RhoGAP1A/Exn/CG4853/RhoGEF2/Crag/spri/RapGAP1/CG30440/cv-c/CG2113/conu/Epac/CG43102/RhoGEF3/mbc/Ziz/sty/Zir/CG5937/PsGEF/rad/CG34393/Rab3-GEF/RhoGAP100F
174	GO:0051606	detection of stimulus	95	-0.456658	-1.73399	0.00160857	0.0258285	0.0219543	1833	tags=33%, list=16%, signal=28%	hmw/Ir68a/PIP5K59B/Gycalpha99B/santa-maria/Galphaq/stj/Ggamma30A/Dscam1/Or2a/Gprk1/Ir40a/ninaC/Ir51b/shakB/Gr64e/OtopLa/CG15270/norpA/rdgA/ATP8B/cac/inaC/CheB42c/Gr64a/Gr64c/Sh/Pzl/Ir76a/Or45b/Ir54a
173	GO:0002921	negative regulation of humoral immune response	22	0.70008	1.96929	0.00152101	0.0248461	0.0211193	86	tags=14%, list=1%, signal=14%	PGRP-SC1a/PGRP-SC1b/PGRP-SC2
172	GO:0030855	epithelial cell differentiation	309	-0.334009	-1.47712	0.00144384	0.0237227	0.0201643	4273	tags=49%, list=36%, signal=32%	Rab7/tkv/Cyfip/Ssk/dia/Dl/stl/sosie/zye/wg/Dhc64C/Mbs/hop/Gprk2/Pi3K92E/bon/btl/in/mid/msn/frtz/par-1/mys/Mrtf/cup/Cbl/grh/sqd/fj/Ppcs/CalpB/Egfr/fry/Mtl/spoon/baz/Abd-B/grk/18w/Rap1/ab/par-6/aPKC/zip/phyl/ptc/Ced-12/ph-p/mim/ttk/Rala/smo/tj/kis/Fs(2)Ket/Traf4/shg/nudE/spi/crb/Nost/Apc/chif/AP-2alpha/GMF/ex/hep/tow/br/GATAe/BicC/fkh/Stat92E/ft/csw/spir/dlg1/ck/CASK/tsh/jing/mop/Akt/kibra/if/Not1/…
171	GO:0042462	eye photoreceptor cell development	97	-0.43444	-1.65184	0.00143565	0.0237227	0.0201643	3844	tags=49%, list=33%, signal=34%	Cam/Dab/grh/didum/fry/Atx2/pyd/lola/oc/vimar/ttk/PIG-V/Nrk/Ire1/crb/Nct/rno/csw/Amph/kibra/Ten-m/Lar/yrt/bdl/Syn2/Kr-h1/AP-1sigma/Doa/N/rg/tutl/Pten/tinc/Alk/Smyd4-3/SP2353/tau/stan/CadN2/jeb/sty/Smyd4-2/chp/CadN/eys/RhoGAP100F/mbl/dysc
170	GO:0042461	photoreceptor cell development	113	-0.420586	-1.64153	0.00134187	0.0223065	0.0189606	4402	tags=60%, list=37%, signal=38%	Afti/rumi/PDZ-GEF/dac/Smyd4-4/msk/wts/ebi/klar/rau/Dl/seq/Mbs/dos/msn/Cam/Dab/grh/didum/fry/Atx2/baz/pyd/lola/oc/vimar/ttk/PIG-V/Nrk/Ire1/crb/Nct/rno/Bsg/csw/Amph/kibra/Ten-m/Lar/yrt/bdl/edl/Syn2/Kr-h1/AP-1sigma/Doa/N/pnt/cnn/rg/tutl/Pten/tinc/Alk/Smyd4-3/SP2353/tau/stan/CadN2/jeb/sty/Smyd4-2/chp/CadN/eys/RhoGAP100F/mbl/dysc
169	GO:0007422	peripheral nervous system development	54	-0.52095	-1.79691	0.00131555	0.0219986	0.0186988	3149	tags=52%, list=27%, signal=38%	ttk/repo/spi/trio/Tollo/Reph/exd/vvl/abd-A/vn/mirr/hth/fra/N/Appl/cnn/Npc1b/Ephrin/Eph/sc/Trim9/spen/cwo/Dscam1/chn/ct/pros/GlcAT-P
168	GO:0022410	circadian sleep/wake cycle process	43	-0.562319	-1.83903	0.00126827	0.0213341	0.0181341	1546	tags=35%, list=13%, signal=30%	Dh31/InR/5-HT1A/cue/Trh/Clk/Hk/Shab/Dop1R2/Nipped-B/Ets96B/hll/Oamb/Sh/qvr
167	GO:0045187	regulation of circadian sleep/wake cycle, sleep	36	-0.567794	-1.77014	0.00115833	0.0196014	0.0166612	1239	tags=33%, list=11%, signal=30%	InR/5-HT1A/cue/Trh/Clk/Hk/Shab/Dop1R2/Ets96B/hll/Sh/qvr
166	GO:0045333	cellular respiration	147	0.423903	1.7059	0.00114601	0.0195098	0.0165834	2570	tags=50%, list=22%, signal=39%	ATPsynepsilonL/ATPsynbetaL/ND-B12/COX5A/ND-B18/COX4/ATPsynF/cype/Mdh1/ND-30/ATPsynO/UQCR-14/CG7630/Cyt-c1L/SdhC/ND-PDSW/UQCR-C2/ND-20L/ND-B14/CIA30/levy/ND-B14.5B/COX7C/fh/ND-18/ND-ASHI/ND-B14.7/CG10748/ND-B17/ND-MNLL/COX5B/UQCR-6.4/CG9034/COX7A/dj-1beta/Scsalpha1/ND-39/RFeSP/ND-20/ND-75/SdhD/UQCR-Q/Idh3a/ND-ACP/CG11752/ATPCL/NP15.6/Irp-1A/Cyt-c1/CG5214/ND-42/ND-15/ND-13A/ND-B15/Mdh2/ND-B14.5A/CO…
165	GO:0006835	dicarboxylic acid transport	27	-0.633964	-1.85964	0.00111786	0.0191459	0.016274	2418	tags=59%, list=21%, signal=47%	CG5254/GC2/Dic2/Prestin/Dic3/Indy-2/CG8026/Sol1/VGlut/Indy/CG18418/CG9582/KaiR1D/Eaat2/CG7514/CG16736
164	GO:0034470	ncRNA processing	298	0.351995	1.55995	0.00110317	0.0190095	0.0161581	4115	tags=49%, list=35%, signal=32%	CG15930/Kots/aub/blanks/CG10993/scu/Fib/CG2006/CG6999/SoYb/CG32706/Tsen15/mael/RpL10Ab/CG8097/mdlc/RpS8/Rrp40/cuff/Rbm13/mldr/Ddx1/CG32409/Tcs4/RtcB/CG15014/CG40813/CG9107/wuho/CG11858/CG41562/IntS14/RpS16/CG6833/RpS21/Dph3/dbe/La/Cbp20/mtTFB1/CG14543/RpL7A/Sas10/CG11417/CG10189/RpL35/CG3587/CG31249/RpL7/CG6712/Rrp42/CG2260/CG8939/CG3527/IntS2/CG3817/Non3/CG2972/RpS7/Nfs1/Rrp4/Uba4/Rpp14a/hoip/CG…
163	GO:0140115	export across plasma membrane	10	-0.807245	-1.83544	0.00107234	0.0185915	0.0158028	1036	tags=40%, list=9%, signal=37%	CG45062/CG5250/nrv3/JYalpha
162	GO:0009205	purine ribonucleoside triphosphate metabolic process	36	0.60398	1.91625	0.00106342	0.0185507	0.0157682	2456	tags=61%, list=21%, signal=48%	ATPsynepsilonL/ATPsynbetaL/ATPsynF/awd/ATPsynG/ATPsynO/ATPsynD/ATPsynB/ATPsyngamma/ATPsynE/ras/sesB/ATPsynCF6/CLS/ATPsyndelta/blw/Fign/ATPsynbeta/Scox/sun/Datp/CG3337
161	GO:0042330	taxis	110	-0.431621	-1.67837	0.000997605	0.0175108	0.0148842	3450	tags=54%, list=29%, signal=38%	M6/slgA/CG6867/wun2/lola/Sema2b/fz2/sli/yuri/Timp/Hipk/nmo/br/drl/Rac2/dlg1/CarT/LRP1/l(3)L1231/Tl/Sema1b/tor/robo2/Ten-m/TrpA1/Sema5c/beat-IIIc/Sulf1/Ptth/pain/orion/NetB/shep/svp/Nmdar1/lap/S6k/Sema2a/Ten-a/Ptp69D/PlexA/Gycalpha99B/santa-maria/Galphaq/fz/Wnt4/CG34353/Con/stan/robo3/Dop1R1/Sema1a/ple/esg/norpA/rdgA/Pdfr/Drl-2/CG3857
160	GO:0055078	sodium ion homeostasis	11	-0.782543	-1.81506	0.000977599	0.0172668	0.0146769	1036	tags=36%, list=9%, signal=33%	CG45062/CG5250/nrv3/JYalpha
159	GO:0045433	male courtship behavior, veined wing generated song production	15	-0.740245	-1.87237	0.00094305	0.0167614	0.0142472	1556	tags=47%, list=13%, signal=41%	fru/btv/cac/Nlg2/fipi/FoxP/para
157	GO:0048565	digestive tract development	106	-0.428011	-1.65454	0.000930218	0.0166379	0.0141423	4251	tags=61%, list=36%, signal=39%	Ssk/Ubx/sob/pbl/wg/hop/put/Myo31DF/sna/rho/mys/Notum/srp/Egfr/Mef2/FoxK/cnc/Abd-B/opa/zip/fz2/sli/shg/D/spi/drm/crb/GATAe/fkh/Stat92E/Dad/trh/byn/LanB2/tsh/if/Pvf1/puc/abd-A/vn/mew/emc/cv-c/Pvr/N/svp/scb/wb/pnt/raw/bsk/cnn/Antp/shn/fz/tnc/Alk/IA-2/pim/pan/ct/lab/Sox21a/kug/Kr
158	GO:0055123	digestive system development	106	-0.428011	-1.65454	0.000930218	0.0166379	0.0141423	4251	tags=61%, list=36%, signal=39%	Ssk/Ubx/sob/pbl/wg/hop/put/Myo31DF/sna/rho/mys/Notum/srp/Egfr/Mef2/FoxK/cnc/Abd-B/opa/zip/fz2/sli/shg/D/spi/drm/crb/GATAe/fkh/Stat92E/Dad/trh/byn/LanB2/tsh/if/Pvf1/puc/abd-A/vn/mew/emc/cv-c/Pvr/N/svp/scb/wb/pnt/raw/bsk/cnn/Antp/shn/fz/tnc/Alk/IA-2/pim/pan/ct/lab/Sox21a/kug/Kr
156	GO:0070588	calcium ion transmembrane transport	45	-0.549606	-1.81573	0.000875137	0.0158534	0.0134755	2327	tags=44%, list=20%, signal=36%	pain/sl/Prestin/PMCA/RyR/Recs1/Ca-Ma2d/stj/CG12061/Mid1/CG1090/Nckx30C/Ca-alpha1T/Ca-beta/norpA/KaiR1D/cac/CG4704/stol/CG43321
155	GO:0023061	signal release	128	-0.41926	-1.67058	0.000831221	0.015155	0.0128818	2783	tags=33%, list=24%, signal=25%	Dyb/CASK/mop/Akt/Chc/Rab3-GAP/Exn/Sec10/rogdi/CG9650/GABA-B-R2/Syngr/sky/Rab3/NFAT/Gbp1/nSyb/JhI-21/Rph/Syx4/Syn/Sytalpha/Sytbeta/cmpy/InR/Sol1/Syt4/Frq2/CanB/brp/Cadps/Fife/KaiR1D/unc-104/cac/cpx/Rab3-GEF/Rim/Snap25/unc-13/Syt7/Frq1
154	GO:0022603	regulation of anatomical structure morphogenesis	181	-0.381692	-1.58793	0.000825294	0.0151447	0.012873	4194	tags=50%, list=36%, signal=33%	dia/Dl/pbl/zye/Lrrk/hop/Gbeta13F/btl/msn/par-1/mys/Ythdf/Dok/Fis1/Wnt5/fj/ss/fry/Mtl/baz/sd/htl/pyd/Rap1/aPKC/zip/Nedd4/ed/ttk/Sema2b/Rala/fz2/Hipk/nudE/nmo/babos/Hecw/trio/Frl/cno/ft/DAAM/Bx/Hem/bb8/Rac2/kat-60L1/kmr/Sema1b/flw/vvl/Sema5c/RhoGEF2/cta/RhoGAPp190/cv-c/ds/fra/Cad86C/pnt/gish/Sema2a/raw/nyo/PlexA/G9a/tutl/kn/smog/fz/Pten/ovo/Trim9/rl/mey/Dscam1/aop/tyn/stan/CG17991/fzo/m/Sema1a/Plex…
153	GO:0008039	synaptic target recognition	50	-0.557273	-1.89214	0.000822362	0.0151447	0.012873	3395	tags=60%, list=29%, signal=43%	CG6867/ab/gek/Sema2b/fz2/sli/Nrx-IV/Tl/robo2/Ten-m/beat-IIIc/Sulf1/Pvf3/NetB/Sema2a/Ten-a/Ptp69D/CG5758/tutl/hig/Wnt4/slow/Con/robo3/nrm/Sema1a/CG32373/Drl-2/loaf/dpr12
152	GO:0050802	circadian sleep/wake cycle, sleep	39	-0.569947	-1.80927	0.000800332	0.0148799	0.0126479	1239	tags=33%, list=11%, signal=30%	InR/5-HT1A/cue/Trh/Clk/Hk/Shab/Dop1R2/Nipped-B/Ets96B/hll/Sh/qvr
151	GO:0002698	negative regulation of immune effector process	19	0.744872	2.03171	0.000777646	0.0145538	0.0123708	86	tags=16%, list=1%, signal=16%	PGRP-SC1a/PGRP-SC1b/PGRP-SC2
150	GO:0006119	oxidative phosphorylation	107	0.469467	1.81596	0.000743392	0.0140055	0.0119047	2463	tags=56%, list=21%, signal=45%	ATPsynepsilonL/ATPsynbetaL/ND-B12/COX5A/ND-B18/COX4/ATPsynF/cype/ND-30/ATPsynO/UQCR-14/CG7630/Cyt-c1L/SdhC/ND-PDSW/UQCR-C2/ND-B14/CIA30/levy/ND-B14.5B/COX7C/fh/ND-18/ND-ASHI/ND-B14.7/ND-B17/ND-MNLL/COX5B/UQCR-6.4/CG9034/COX7A/dj-1beta/ND-39/RFeSP/ND-20/ND-75/SdhD/UQCR-Q/ND-ACP/CG11752/NP15.6/Cyt-c1/ND-42/ND-15/ND-13A/ND-B15/ND-B14.5A/COX8/ND-19/ND-B17.2/SdhB/Lrpprc2/ATPsynbeta/ND-51/ND-24/sun/ox/…
144	GO:0002785	negative regulation of antimicrobial peptide production	15	0.800533	2.02897	0.000736223	0.0139635	0.011869	86	tags=20%, list=1%, signal=20%	PGRP-SC1a/PGRP-SC1b/PGRP-SC2
145	GO:0009145	purine nucleoside triphosphate biosynthetic process	29	0.631298	1.8901	0.000735894	0.0139635	0.011869	2456	tags=72%, list=21%, signal=57%	ATPsynepsilonL/ATPsynbetaL/ATPsynF/awd/ATPsynG/ATPsynO/ATPsynD/ATPsynB/ATPsyngamma/ATPsynE/ras/sesB/ATPsynCF6/CLS/ATPsyndelta/blw/ATPsynbeta/Scox/sun/Datp/CG3337
146	GO:0009206	purine ribonucleoside triphosphate biosynthetic process	29	0.631298	1.8901	0.000735894	0.0139635	0.011869	2456	tags=72%, list=21%, signal=57%	ATPsynepsilonL/ATPsynbetaL/ATPsynF/awd/ATPsynG/ATPsynO/ATPsynD/ATPsynB/ATPsyngamma/ATPsynE/ras/sesB/ATPsynCF6/CLS/ATPsyndelta/blw/ATPsynbeta/Scox/sun/Datp/CG3337
149	GO:0006091	generation of precursor metabolites and energy	238	0.374441	1.62201	0.000724474	0.0139635	0.011869	1711	tags=33%, list=15%, signal=29%	Ilp2/Adh/ATPsynepsilonL/ATPsynbetaL/FASN1/Gapdh1/Taldo/Tpi/Pgd/Pglym78/ND-B12/COX5A/ND-B18/COX4/Rpi/ATPsynF/Gapdh2/cype/Mdh1/ND-30/ATPsynO/UQCR-14/CG7630/Cyt-c1L/SdhC/ND-PDSW/Ald1/UQCR-C2/ND-20L/ND-B14/CIA30/levy/ND-B14.5B/Pgk/COX7C/Eno/fh/ND-18/ND-ASHI/GlyP/ND-B14.7/CG10748/ND-B17/ND-MNLL/COX5B/Oscillin/UQCR-6.4/CG9034/COX7A/dj-1beta/Scsalpha1/ND-39/RFeSP/Pgi/Pgm1/ND-20/Fdh/ND-75/SdhD/UQCR-Q/AGB…
148	GO:0010975	regulation of neuron projection development	115	-0.437683	-1.72472	0.000734545	0.0139635	0.011869	3303	tags=43%, list=28%, signal=31%	lola/Ror/Nedd4/Sema2b/fz2/Nrk/nudE/babos/Hecw/trio/DAAM/Rac2/kat-60L1/LRP1/Akt/Sema1b/Imp/vvl/rictor/Sema5c/RhoGEF2/RhoGAPp190/cv-c/Kr-h1/fra/NetB/comm/S6k/Sema2a/PlexA/G9a/tutl/kn/mav/fz/Pten/Trim9/robo1/Dscam1/stan/Ddr/Sema1a/PlexB/pros/unc-104/dar1/CadN/sif/Ret
147	GO:0046532	regulation of photoreceptor cell differentiation	45	-0.553671	-1.82916	0.000717397	0.0139635	0.011869	3827	tags=60%, list=33%, signal=41%	mask/Dab/S6kII/ss/p53/Rap1/cdi/oc/ed/ttk/RasGAP1/Nct/csw/mop/Src42A/Kr-h1/sl/Src64B/N/sdk/spg/rl/tinc/aop/sty/sv/pros
143	GO:0008348	negative regulation of antimicrobial humoral response	19	0.747845	2.03982	0.000694141	0.0137178	0.0116601	86	tags=16%, list=1%, signal=16%	PGRP-SC1a/PGRP-SC1b/PGRP-SC2
142	GO:0001505	regulation of neurotransmitter levels	102	-0.453537	-1.7473	0.000677161	0.0134764	0.011455	2783	tags=35%, list=24%, signal=27%	Dyb/CarT/CASK/mop/Chc/Rab3-GAP/Exn/Sec10/rogdi/GABA-B-R2/Syngr/sky/Rab3/NFAT/nSyb/Rph/Syx4/Syn/Sytalpha/Sytbeta/Sol1/Syt4/Frq2/CanB/brp/Cadps/Fife/KaiR1D/cac/cpx/Rab3-GEF/Rim/Snap25/unc-13/Syt7/Frq1
141	GO:1902531	regulation of intracellular signal transduction	356	-0.326791	-1.47116	0.00066782	0.0133848	0.0113771	4035	tags=42%, list=34%, signal=29%	put/Myd88/dos/Gprk2/Pi3K92E/CG5521/CG43658/msn/CG15611/SkpA/par-1/RhoGAP54D/Atg2/Cbl/Lztr1/CG3630/PRAS40/Dok/Usp7/CG9098/raskol/S6kII/Leash/aos/IKKbeta/Mtor/Egfr/Mkp3/Tor/Orai/Pura/Sbf/Nf1/Sik3/ImpL2/POSH/pyd/Rap1/Cad96Ca/Rassf/aPKC/Ror/ptc/Ced-12/wrd/ed/Iml1/Rala/step/Prosap/Clbn/Traf4/Nrk/Hipk/spi/crb/ex/CG42638/Trpml/alpha-Spec/trio/cno/Slmap/ft/poe/Cul1/Akt/rut/kibra/Aplip1/tor/Pvf1/flw/puc/S…
140	GO:0042745	circadian sleep/wake cycle	50	-0.563405	-1.91296	0.00065222	0.0131655	0.0111907	1546	tags=34%, list=13%, signal=30%	Dh31/InR/5-HT1A/cue/Trh/Clk/Hk/Shab/Dop1R2/Nipped-B/Ets96B/Pdfr/hll/Oamb/Rdl/Sh/qvr
139	GO:0050803	regulation of synapse structure or activity	190	-0.378099	-1.58811	0.000632407	0.0128992	0.0109643	4068	tags=49%, list=35%, signal=33%	wit/Lrrk/Khc-73/put/Pi3K92E/btl/dlp/SkpA/spartin/mys/cup/pum/S6kII/wnd/hiw/Tor/Atx2/dbo/Syp/Nf1/Cul2/beta-Spec/LanA/htl/Spn/Rab8/Nedd4/Ank2/Smox/kis/nmo/CG42638/Trpml/alpha-Spec/trio/Dad/Hem/dlg1/CASK/Ekar/Akt/Aplip1/Src42A/Ten-m/babo/rictor/Rab3-GAP/Ypel/Nrx-1/Fak/Syn1/Syn2/ewg/Src64B/Fas2/scb/S6k/CaMKII/sgg/Ten-a/brat/metro/Liprin-gamma/drpr/CG11155/Itgbn/PIP5K59B/Dg/GluRIIB/mav/stj/Syx4/myo/en…
138	GO:0045596	negative regulation of cell differentiation	93	-0.471073	-1.78029	0.000634462	0.0128992	0.0109643	3827	tags=55%, list=33%, signal=37%	mask/Ythdf/S6kII/srp/aos/bnl/p53/Su(H)/sd/ana/Abd-B/goe/cdi/C1GalTA/zfh1/ed/ttk/repo/Sema2b/RasGAP1/chm/enok/Stat92E/Ser/tws/kibra/Sema1b/Sema5c/Kr-h1/sl/Fas2/N/sdk/pnt/Sema2a/brat/Pten/ush/hdc/l(2)gl/gcm2/aop/chn/sty/bun/He/Sema1a/esg/pros/CadN/Sox21a
137	GO:0035295	tube development	238	-0.356954	-1.54012	0.000620584	0.0128012	0.0108811	4270	tags=54%, list=36%, signal=35%	klar/tkv/Ssk/Ubx/insc/sob/ect/seq/pbl/wg/wat/Dhc64C/hop/put/btl/Myo31DF/bs/mid/sna/Cds/rho/mys/tup/wkd/Notum/grh/srp/stac/bnl/Gyc76C/Egfr/Mkp3/Mef2/FoxK/Tor/baz/cnc/Abd-B/pyd/opa/TSG101/par-6/aPKC/zip/caps/Rbcn-3B/ed/ttk/knk/fz2/sli/noc/trn/Timp/shg/D/spi/drm/crb/lolal/GATAe/fkh/Stat92E/LanB1/Dad/trh/h/byn/Rac2/LanB2/tsh/pnr/if/Pvf1/stumps/puc/CG45105/robo2/abd-A/vn/jumu/Hand/brk/mew/emc/cv-c/Mmp…
136	GO:0033108	mitochondrial respiratory chain complex assembly	70	0.511778	1.8503	0.000602558	0.0125208	0.0106427	1762	tags=41%, list=15%, signal=35%	ND-B12/ND-B18/Sdhaf3/CG17726/ND-PDSW/ND-20L/ND-B14/CIA30/ND-B14.5B/sicily/ND-18/ND-ASHI/ND-B14.7/ND-MNLL/COX6B/CG3270/CG44194/ND-39/ND-20/ND-ACP/Ccdc56/Cox17/ND-15/l(3)87Df/ND-B15/CG13018/ND-19/Surf1/ND-B17.2
134	GO:0006120	mitochondrial electron transport, NADH to ubiquinone	43	0.589059	1.94986	0.000594317	0.012441	0.0105749	2463	tags=70%, list=21%, signal=55%	ND-B12/ND-B18/ND-30/ND-PDSW/ND-B14/CIA30/ND-B14.5B/ND-18/ND-ASHI/ND-B14.7/ND-B17/ND-MNLL/CG9034/ND-39/ND-20/ND-75/ND-ACP/CG11752/NP15.6/ND-42/ND-15/ND-13A/ND-B15/ND-B14.5A/ND-19/ND-B17.2/ND-51/ND-24/ND-MWFE/ND-13B
135	GO:0045595	regulation of cell differentiation	268	-0.358539	-1.55733	0.000592349	0.012441	0.0105749	4060	tags=45%, list=35%, signal=30%	Dhc64C/Lrrk/Mbs/Pi3K92E/btl/mid/Sidpn/par-1/mask/Ythdf/Dab/grh/S6kII/srp/Wnt5/Orcokinin/aos/unk/bnl/ss/p53/Su(H)/sd/ana/Cenp-C/Abd-B/goe/Rap1/bru1/cdi/aPKC/Hey/oc/Nedd4/C1GalTA/zfh1/ed/ttk/repo/Sema2b/smo/E(spl)m3-HLH/Smox/RasGAP1/nudE/spi/Apc/Nct/chm/enok/ex/Stat92E/Ser/csw/tws/DAAM/h/Cul1/kat-60L1/mop/kibra/E(spl)mdelta-HLH/Sema1b/Src42A/Vmat/babo/Sema5c/nub/vn/Kr-h1/orion/sl/hth/Src64B/Fas2/N/…
133	GO:0009060	aerobic respiration	138	0.442015	1.7603	0.000548792	0.0116608	0.00991171	2570	tags=53%, list=22%, signal=42%	ATPsynepsilonL/ATPsynbetaL/ND-B12/COX5A/ND-B18/COX4/ATPsynF/cype/Mdh1/ND-30/ATPsynO/UQCR-14/CG7630/Cyt-c1L/SdhC/ND-PDSW/UQCR-C2/ND-20L/ND-B14/CIA30/levy/ND-B14.5B/COX7C/fh/ND-18/ND-ASHI/ND-B14.7/CG10748/ND-B17/ND-MNLL/COX5B/UQCR-6.4/CG9034/COX7A/dj-1beta/Scsalpha1/ND-39/RFeSP/ND-20/ND-75/SdhD/UQCR-Q/Idh3a/ND-ACP/CG11752/ATPCL/NP15.6/Irp-1A/Cyt-c1/CG5214/ND-42/ND-15/ND-13A/ND-B15/Mdh2/ND-B14.5A/CO…
132	GO:0048638	regulation of developmental growth	236	-0.369096	-1.59278	0.000539659	0.0115536	0.00982059	3617	tags=43%, list=31%, signal=30%	Egfr/hiw/p53/Tor/dbo/sbb/Syp/Nf1/Cul2/beta-Spec/LanA/htl/Rassf/TSG101/Rab8/Sema2b/Ank2/step/Smox/kis/pico/Ire1/Hipk/nmo/Nos/crb/hid/ex/CG42638/Trpml/alpha-Spec/trio/fkh/Dad/ft/Hs6st/dally/dlg1/CASK/Akt/Tl/kibra/Sema1b/tor/pip/Src42A/chico/Lar/babo/rictor/Sema5c/Fak/Syn1/Syn2/PIP4K/ewg/Src64B/Ilp6/Fas2/scb/sfl/Csk/Tace/Sema2a/CaMKII/sgg/Gbp1/kuz/brat/metro/Liprin-gamma/Itgbn/PIP5K59B/ey/fz/Pten/st…
131	GO:0051241	negative regulation of multicellular organismal process	163	-0.404595	-1.66469	0.000538339	0.0115536	0.00982059	3666	tags=50%, list=31%, signal=35%	Lrrk/put/Pi3K92E/btl/SkpA/spartin/Ythdf/S6kII/aos/CG9636/hiw/p53/dbo/sd/Sin3A/Syp/ana/Nf1/Abd-B/LanA/Fbxl4/Spn/cdi/ed/ttk/Sema2b/RasGAP1/Ire1/crb/ex/fkh/Dad/ft/tws/Bx/tsh/Akt/Tl/kibra/Sema1b/tor/Src42A/Sema5c/Fak/Ktl/sl/ewg/Src64B/Doa/N/scb/sdk/pnt/Tace/Sema2a/CaMKII/sgg/bab1/brat/Liprin-gamma/Itgbn/shn/Pten/stj/hdc/Dh31/l(2)gl/ena/Galphao/InR/aop/plum/sty/Octbeta1R/Dop1R2/Sema1a/Lgr3/pros/CG1050…
130	GO:0045926	negative regulation of growth	110	-0.441897	-1.71832	0.000496351	0.0107899	0.00917145	3587	tags=49%, list=31%, signal=34%	SkpA/spartin/sima/Ythdf/hiw/Mnt/dbo/Syp/Nf1/LanA/TSG101/Sema2b/Ire1/crb/ex/fkh/Dad/ft/dlg1/Akt/Tl/kibra/Sema1b/tor/Src42A/Sema5c/scyl/mirr/Fak/ewg/Src64B/scb/Csk/Tace/Sesn/Sema2a/sgg/Gbp1/chrb/Liprin-gamma/Itgbn/Schip1/Pten/stj/l(2)gl/ena/Galphao/plum/Octbeta1R/Sema1a/Lgr3/CG10508/unc-104/nwk
129	GO:0002009	morphogenesis of an epithelium	324	-0.349471	-1.55502	0.000469567	0.0102868	0.0087438	4060	tags=48%, list=35%, signal=32%	Dhc64C/Mbs/hop/put/Eip63E/Gbeta13F/btl/in/bs/sna/msn/Cds/frtz/rho/par-1/mys/Rab23/mask/tup/Cbl/Dab/Dok/grh/srp/sqd/fj/Ppcs/aos/stac/bnl/Gyc76C/Egfr/Mkp3/Mtl/Tor/spoon/baz/grk/Cul2/sca/Pkn/18w/POSH/pyd/Mcr/Rap1/lola/TSG101/par-6/aPKC/zip/ph-p/caps/Ack-like/ed/Drak/ttk/Rala/knk/step/noc/trn/Traf4/shg/Hipk/nmo/spi/crb/Nost/hep/Frl/tow/cno/fkh/LanB1/Dad/ft/Tollo/csw/trh/byn/Rac2/dlg1/Nrx-IV/kmr/tsh/s…
127	GO:0007622	rhythmic behavior	108	-0.454204	-1.76085	0.000411711	0.00908981	0.00772635	1707	tags=26%, list=15%, signal=22%	na/sxc/Dh31/unc80/Mid1/NPF/InR/5-HT1A/cue/Adar/Trh/Clk/Ac3/Hk/Shab/Dop1R2/Nipped-B/Ets96B/Pdfr/hll/Oamb/Rdl/dysc/kairos/unc79/Sh/qvr/e
128	GO:0048512	circadian behavior	108	-0.454204	-1.76085	0.000411711	0.00908981	0.00772635	1707	tags=26%, list=15%, signal=22%	na/sxc/Dh31/unc80/Mid1/NPF/InR/5-HT1A/cue/Adar/Trh/Clk/Ac3/Hk/Shab/Dop1R2/Nipped-B/Ets96B/Pdfr/hll/Oamb/Rdl/dysc/kairos/unc79/Sh/qvr/e
126	GO:1902533	positive regulation of intracellular signal transduction	188	-0.399847	-1.6743	0.000374842	0.00840716	0.0071461	4087	tags=46%, list=35%, signal=31%	Lst8/CG42674/put/Myd88/Gprk2/Pi3K92E/CG43658/msn/CG15611/CG3630/Dok/CG9098/Leash/IKKbeta/Mtor/Egfr/Tor/Orai/Pura/POSH/pyd/Rap1/Cad96Ca/Ror/ptc/Ced-12/ed/step/Clbn/Traf4/Nrk/Hipk/spi/crb/ex/CG42638/Trpml/alpha-Spec/trio/Slmap/ft/Akt/kibra/tor/Pvf1/Src42A/chico/TrpA1/rictor/vn/Sur-8/RhoGAP1A/Exn/CG4853/RhoGEF2/CG30440/ds/Pvr/Crk/Src64B/CG2113/Csk/Pka-C1/Gbp1/CYLD/Recs1/Schip1/CG43102/spg/myo/l(2)gl…
125	GO:0050767	regulation of neurogenesis	127	-0.43252	-1.71894	0.000374166	0.00840716	0.0071461	3244	tags=37%, list=28%, signal=27%	aPKC/Hey/ed/repo/Sema2b/E(spl)m3-HLH/Smox/nudE/spi/tws/h/kat-60L1/kibra/E(spl)mdelta-HLH/Sema1b/babo/Sema5c/nub/N/pnt/Sema2a/nerfin-1/brat/PlexA/G9a/SoxN/Antp/E(spl)m7-HLH/fz/hdc/l(2)gl/pyr/cwo/InR/aop/stan/bun/Sema1a/esg/PlexB/pros/dar1/Myc/CadN/sif/Kr/Actbeta
124	GO:0002701	negative regulation of production of molecular mediator of immune response	16	0.787479	2.04999	0.000342431	0.00780411	0.00663351	86	tags=19%, list=1%, signal=19%	PGRP-SC1a/PGRP-SC1b/PGRP-SC2
119	GO:0072376	protein activation cascade	20	0.753437	2.04505	0.000326879	0.00751023	0.00638371	1333	tags=50%, list=11%, signal=44%	PGRP-SC1a/PGRP-SC1b/PGRP-SC2/grass/psh/PGRP-SA/spirit/sphe/26-29-p/ea
120	GO:0160032	Toll receptor ligand protein activation cascade	20	0.753437	2.04505	0.000326879	0.00751023	0.00638371	1333	tags=50%, list=11%, signal=44%	PGRP-SC1a/PGRP-SC1b/PGRP-SC2/grass/psh/PGRP-SA/spirit/sphe/26-29-p/ea
123	GO:0007611	learning or memory	162	-0.410631	-1.68328	0.000320381	0.00751023	0.00638371	3818	tags=51%, list=33%, signal=35%	pum/Dop2R/teq/S6kII/wnd/ss/CenG1A/Egfr/hiw/spoon/Atx2/Su(H)/Nf1/Tomosyn/AGO1/orb2/aPKC/Shal/Tob/Ank2/kis/be/ebo/spi/Rbfox1/Gba1b/drl/Stat92E/pxb/Sap47/CASK/HDAC4/rut/CRMP/dbr/chico/meng/vn/Nrx-1/mura/eas/Ptp10D/Src64B/Inx7/Krn/Fas2/N/Appl/scb/dikar/Nmdar1/gish/CaMKII/bsk/sgg/Pka-C1/rg/G9a/Gad1/dnc/Syn/Gba1a/mol/Alk/5-HT1A/mil/klg/Tbh/Dop1R1/AdoR/Nipped-B/brp/DopEcR/rad/Oamb/Nmdar2/futsch/Rdl/2mit…
122	GO:0007606	sensory perception of chemical stimulus	94	-0.48046	-1.81946	0.000322751	0.00751023	0.00638371	1474	tags=36%, list=13%, signal=32%	Gr93d/dpr19/Ggamma30A/Galphao/Dyrk2/Or2a/Ir40a/Trh/Gr64e/OtopLa/dpr14/dpr6/Gr77a/norpA/dpr4/dpr13/rdgA/ATP8B/dpr7/pros/dpr5/dpr12/dpr20/CheB42c/dpr10/dpr11/Gr39a/Gr64a/Gr64c/Sh/dpr8/Obp56i/Ir76a/Or45b
121	GO:0042749	regulation of circadian sleep/wake cycle	45	-0.575462	-1.90115	0.000319798	0.00751023	0.00638371	1546	tags=36%, list=13%, signal=31%	Dh31/InR/5-HT1A/cue/Trh/Clk/Hk/Shab/Dop1R2/Ets96B/Pdfr/hll/Oamb/Rdl/Sh/qvr
118	GO:0048511	rhythmic process	150	-0.424318	-1.71593	0.000306638	0.00734372	0.00624218	3744	tags=48%, list=32%, signal=33%	Plc21C/gw/S6kII/inc/Mef2/timeout/Atx2/CG10948/Pura/Cul3/Nf1/wake/Sik3/DAT/ctrip/Fbxl4/Akap200/Ac78C/Nca/CkIIalpha/B4/hid/Ork1/Acer/Bx/dlg1/cyc/Akt/rut/TrpA1/emc/Fas2/sgg/Pka-C1/gl/na/dnc/sxc/Dh31/robo1/cwo/unc80/Mid1/NPF/InR/5-HT1A/cue/Adar/Trh/Clk/Pdp1/sNPF/Ac3/Hk/Shab/Dop1R2/Nipped-B/5-HT1B/norpA/Ets96B/Pdfr/hll/Cipc/eys/Oamb/Rdl/dysc/kairos/unc79/Sh/qvr/e
117	GO:0060284	regulation of cell development	168	-0.409031	-1.69108	0.000300855	0.00726681	0.0061768	3244	tags=37%, list=28%, signal=27%	aPKC/Hey/oc/Nedd4/ed/repo/Sema2b/E(spl)m3-HLH/Smox/nudE/spi/Nct/Ser/csw/tws/h/Cul1/kat-60L1/kibra/E(spl)mdelta-HLH/Sema1b/babo/Sema5c/nub/Kr-h1/orion/Fas2/N/pnt/Sema2a/bsk/nerfin-1/brat/PlexA/G9a/SoxN/Antp/E(spl)m7-HLH/kn/fz/Pten/hdc/l(2)gl/pyr/tinc/cwo/InR/aop/stan/sty/bun/He/Sema1a/esg/PlexB/pros/dar1/Myc/CadN/sif/Kr/Actbeta
116	GO:0022613	ribonucleoprotein complex biogenesis	293	0.368604	1.62841	0.000289674	0.00712304	0.00605459	4128	tags=53%, list=35%, signal=35%	RpS5b/CG6220/CG10993/RpS19b/Fib/CG3294/CG9123/CG6999/eIF2D/CG32706/RpS14a/RpL10Ab/RpS19a/RpS9/RpS8/Rrp40/RpL34b/RpL26/RpS14b/Rbm13/CG32409/SmE/DENR/Smn/CG40813/icln/CG9107/CG11858/eIF3a/CG41562/SNRPG/RpS16/Mrm2/CG6833/RpS21/dbe/RpS12/mtTFB1/CG14543/Hsp83/SmD3/l(2)09851/RpL7A/Sas10/CG11417/mbm/RpLP0/RpS6/Prp18/Secp43/RpL35/SmF/RpL7/CG6712/RpS5a/Rrp42/CG2260/CG8939/RpL6/rept/CG3527/CG3817/Non3/CG12…
115	GO:0050890	cognition	163	-0.413035	-1.69942	0.000292382	0.00712304	0.00605459	3818	tags=52%, list=33%, signal=35%	pum/Dop2R/teq/S6kII/wnd/ss/CenG1A/Egfr/hiw/spoon/Atx2/Su(H)/Nf1/Tomosyn/AGO1/orb2/aPKC/Shal/Tob/Ank2/kis/be/ebo/spi/Rbfox1/Gba1b/drl/Stat92E/pxb/Sap47/CASK/HDAC4/rut/CRMP/dbr/chico/meng/vn/Nrx-1/mura/eas/Ptp10D/Src64B/Inx7/Krn/Fas2/N/Appl/scb/dikar/Nmdar1/gish/CaMKII/bsk/sgg/Pka-C1/rg/G9a/Ptr/Gad1/dnc/Syn/Gba1a/mol/Alk/5-HT1A/mil/klg/Tbh/Dop1R1/AdoR/Nipped-B/brp/DopEcR/rad/Oamb/Nmdar2/futsch/Rdl/…
114	GO:0007200	phospholipase C-activating G protein-coupled receptor signaling pathway	12	-0.783672	-1.86605	0.000291332	0.00712304	0.00605459	1904	tags=75%, list=16%, signal=63%	Gbp1/mAChR-A/mtt/Ggamma30A/5-HT1A/5-HT1B/norpA/Oamb/CG17760
113	GO:0045165	cell fate commitment	309	-0.352847	-1.56042	0.000283204	0.00708261	0.00602023	4579	tags=53%, list=39%, signal=33%	grn/rumi/PDZ-GEF/mts/Tao/Oli/klu/dac/nuf/ara/how/msk/wts/elB/osa/pcs/tkv/Ubx/insc/Galphai/ana2/Dl/seq/wg/dap/drosha/Dhc64C/put/dos/sim/egl/bon/Asx/Gbeta13F/btl/mei-9/mid/sna/rho/par-1/mask/tup/Cbl/Dab/grh/Blimp-1/S6kII/srp/Wnt5/msi/Sirt1/Egfr/ap/Su(H)/baz/Cul3/Abd-B/wake/htl/pyd/Rap1/lola/AGO1/ru/cdi/par-6/aPKC/phyl/nkd/ptc/Hey/oc/ed/ttk/Rala/fz2/Smox/tj/noc/org-1/Dr/CkIIalpha/RasGAP1/Traf4/GATAd…
111	GO:0007269	neurotransmitter secretion	97	-0.464885	-1.76759	0.000280575	0.00707952	0.0060176	2783	tags=36%, list=24%, signal=28%	Dyb/CASK/mop/Chc/Rab3-GAP/Exn/Sec10/rogdi/GABA-B-R2/Syngr/sky/Rab3/NFAT/nSyb/Rph/Syx4/Syn/Sytalpha/Sytbeta/Sol1/Syt4/Frq2/CanB/brp/Cadps/Fife/KaiR1D/cac/cpx/Rab3-GEF/Rim/Snap25/unc-13/Syt7/Frq1
112	GO:0099643	signal release from synapse	97	-0.464885	-1.76759	0.000280575	0.00707952	0.0060176	2783	tags=36%, list=24%, signal=28%	Dyb/CASK/mop/Chc/Rab3-GAP/Exn/Sec10/rogdi/GABA-B-R2/Syngr/sky/Rab3/NFAT/nSyb/Rph/Syx4/Syn/Sytalpha/Sytbeta/Sol1/Syt4/Frq2/CanB/brp/Cadps/Fife/KaiR1D/cac/cpx/Rab3-GEF/Rim/Snap25/unc-13/Syt7/Frq1
110	GO:0044282	small molecule catabolic process	152	0.432018	1.76043	0.000249701	0.00641504	0.0054528	3095	tags=46%, list=26%, signal=34%	Uro/Daao2/Adh/arg/CG8353/CG6415/CG11158/CG3699/Gcat/Tpi/Sodh-1/Pgd/Srr/Sodh-2/Adgf-D/Adgf-C/CG4586/Dhpr/Sardh/KFase/Etfb/Mcad/CG11241/CG12177/Eno/CG10467/tzn/CG10184/Oscillin/Echs1/Ech1/Acat1/Galt/Fdh/CG5112/ppl/Agxt/Hacl/Ssadh/Shmt/CG7430/wal/Oat/CG3609/CG8839/CG4598/Mtpbeta/CG8778/CG6330/Gale/CG17224/Ahcy/CG8360/CG4390/CG7840/SCOT/Arc42/Acox57D-d/Acox3/CG6910/Got2/Abcd3/Hmgcl/Pepck2/Seipin/Acat…
109	GO:0048813	dendrite morphogenesis	158	-0.423702	-1.73364	0.000244634	0.00634254	0.00539117	4109	tags=50%, list=35%, signal=33%	Snoo/ems/wit/Dhc64C/Lrrk/Pi3K92E/dom/Nrg/pum/tup/Wnt5/sqz/ss/fry/Tor/cnc/Cul3/lola/ab/Nedd4/Rfx/Sema2b/Smox/sli/Nak/D/nudE/babos/Ulp1/hid/retn/Hecw/br/drl/dally/kat-60L1/vvl/babo/rictor/nub/Hand/jim/cv-c/p120ctn/ftz-f1/fra/NetB/fs(1)h/comm/S6k/Sema2a/Ptp69D/pho/G9a/tutl/kn/shn/fru/robo1/gcm2/cwo/ena/Dscam1/stan/chn/ci/scro/pira/ct/Toll-6/Sema1a/path/pros/unc-104/dar1/CadN/futsch/CG11584/RunxA
108	GO:0016545	male courtship behavior, veined wing vibration	16	-0.75151	-1.91747	0.000225713	0.00590615	0.00502024	1556	tags=50%, list=13%, signal=43%	fru/btv/5-HT7/cac/Nlg2/fipi/FoxP/para
103	GO:0010257	NADH dehydrogenase complex assembly	37	0.656145	2.08793	0.000215388	0.0057742	0.00490808	1762	tags=57%, list=15%, signal=48%	ND-B12/ND-B18/CG17726/ND-PDSW/ND-20L/ND-B14/CIA30/ND-B14.5B/sicily/ND-18/ND-ASHI/ND-B14.7/ND-MNLL/CG3270/ND-39/ND-20/ND-ACP/ND-15/ND-B15/ND-19/ND-B17.2
104	GO:0032981	mitochondrial respiratory chain complex I assembly	37	0.656145	2.08793	0.000215388	0.0057742	0.00490808	1762	tags=57%, list=15%, signal=48%	ND-B12/ND-B18/CG17726/ND-PDSW/ND-20L/ND-B14/CIA30/ND-B14.5B/sicily/ND-18/ND-ASHI/ND-B14.7/ND-MNLL/CG3270/ND-39/ND-20/ND-ACP/ND-15/ND-B15/ND-19/ND-B17.2
107	GO:0007623	circadian rhythm	149	-0.423201	-1.71002	0.000218627	0.0057742	0.00490808	3744	tags=48%, list=32%, signal=33%	Plc21C/gw/S6kII/inc/Mef2/timeout/Atx2/Pura/Cul3/Nf1/wake/Sik3/DAT/ctrip/Fbxl4/Akap200/Ac78C/Nca/CkIIalpha/B4/hid/Ork1/Acer/Bx/dlg1/cyc/Akt/rut/TrpA1/emc/Fas2/sgg/Pka-C1/gl/na/dnc/sxc/Dh31/robo1/cwo/unc80/Mid1/NPF/InR/5-HT1A/cue/Adar/Trh/Clk/Pdp1/sNPF/Ac3/Hk/Shab/Dop1R2/Nipped-B/5-HT1B/norpA/Ets96B/Pdfr/hll/Cipc/eys/Oamb/Rdl/dysc/kairos/unc79/Sh/qvr/e
106	GO:0030334	regulation of cell migration	88	-0.485192	-1.81211	0.00021685	0.0057742	0.00490808	4156	tags=67%, list=35%, signal=44%	pbl/stl/Pi3K92E/msn/par-1/sima/mys/Rap2l/Cbl/bnl/Egfr/Sin3A/grk/Evi5/LanA/htl/unc-5/zip/ptc/ttk/Sema2b/sli/kis/shg/spi/hep/Akt/Sema1b/Pvf1/puc/Rme-8/robo2/chico/Sema5c/vn/spri/Pvf3/Pvr/sl/fra/Krn/scb/Pvf2/Sema2a/bsk/kuz/PlexA/Pten/robo1/mbc/ena/Dscam1/InR/aop/ths/Sema1a/ple/PlexB/slbo
105	GO:0008045	motor neuron axon guidance	69	-0.525247	-1.88514	0.0002129	0.0057742	0.00490808	3399	tags=55%, list=29%, signal=39%	conv/CG6867/Ptp99A/beat-IIIa/unc-5/caps/zfh1/fz2/trn/NT1/dally/Rac2/CG42327/vvl/Ten-m/Lar/beat-IIIc/Sulf1/Ptp10D/fra/NetB/Fas2/N/Ten-a/Ptp69D/Cdk5alpha/PlexA/Wnt4/robo1/Mmp2/side/Sema1a/PlexB/beat-Ia/Drl-2/beat-IIIb/beat-Ic/beat-Ib
102	GO:2000145	regulation of cell motility	90	-0.48343	-1.80581	0.00020751	0.00574924	0.00488686	4156	tags=67%, list=35%, signal=43%	pbl/stl/Pi3K92E/msn/par-1/sima/mys/Rap2l/Cbl/bnl/Egfr/Sin3A/grk/Evi5/CG17118/LanA/htl/unc-5/zip/ptc/ttk/Sema2b/sli/kis/shg/spi/hep/Akt/Sema1b/Pvf1/puc/Rme-8/robo2/chico/Sema5c/vn/spri/Pvf3/Pvr/sl/fra/Krn/scb/Pvf2/Sema2a/bsk/kuz/PlexA/Pten/robo1/mbc/ena/Dscam1/InR/aop/ths/Sema1a/ple/PlexB/slbo
101	GO:0050907	detection of chemical stimulus involved in sensory perception	21	-0.713328	-1.96193	0.000201428	0.005636	0.00479061	1250	tags=48%, list=11%, signal=43%	Or2a/Ir40a/Gr64e/OtopLa/norpA/ATP8B/Gr64a/Gr64c/Ir76a/Or45b
100	GO:0050909	sensory perception of taste	21	-0.715923	-1.96907	0.000189521	0.00535587	0.0045525	1474	tags=57%, list=13%, signal=50%	Gr93d/Ggamma30A/Galphao/Gr64e/OtopLa/Gr77a/norpA/pros/Gr39a/Gr64a/Gr64c/Sh
99	GO:0051093	negative regulation of developmental process	202	-0.402799	-1.71143	0.000185163	0.00528556	0.00449274	3729	tags=48%, list=32%, signal=33%	S6kII/srp/aos/bnl/Egfr/fry/hiw/p53/Su(H)/dbo/sd/Syp/ana/Nf1/Abd-B/LanA/goe/TSG101/Spn/cdi/C1GalTA/zfh1/ed/ttk/repo/Sema2b/RasGAP1/Ire1/crb/Apc/chm/enok/ex/fkh/Stat92E/Dad/ft/Ser/tws/bb8/dlg1/tsh/Akt/Tl/kibra/Sema1b/tor/Src42A/chico/Sema5c/Fak/Bruce/Kr-h1/sl/ewg/Src64B/Fas2/N/scb/sdk/pnt/Csk/Tace/Sema2a/sgg/bab1/brat/Liprin-gamma/Itgbn/shn/Galphaq/Pten/stj/ush/hdc/l(2)gl/gcm2/ena/Galphao/InR/aop/p…
97	GO:0007431	salivary gland development	119	-0.453038	-1.78492	0.000181367	0.00523004	0.00444554	4384	tags=68%, list=37%, signal=43%	Eip74EF/fog/Btk/Dif/Fhos/tkv/dia/l(3)psg2/drosha/Strica/put/egl/PH4alphaSG1/eyg/rho/mys/Cam/Trf2/srp/Wnt5/IP3K2/Itpr/Gyc76C/Egfr/MED24/Mtl/CrebA/AdamTS-A/Abd-B/htl/unc-5/zip/caps/fz2/sli/trn/shg/crb/hid/retn/lolal/br/drl/fkh/Ser/trh/h/Utx/Rac2/LanB2/tsh/if/Pvf1/exd/Src42A/robo2/mew/Pvr/hth/Src64B/fra/NetB/scb/Pvf2/Atg17/raw/drpr/shn/fz/hdc/Wnt4/l(2)gl/robo1/rpr/betaTub85D/jeb/PH4alphaSG2/sigmar/p…
98	GO:0035272	exocrine system development	119	-0.453038	-1.78492	0.000181367	0.00523004	0.00444554	4384	tags=68%, list=37%, signal=43%	Eip74EF/fog/Btk/Dif/Fhos/tkv/dia/l(3)psg2/drosha/Strica/put/egl/PH4alphaSG1/eyg/rho/mys/Cam/Trf2/srp/Wnt5/IP3K2/Itpr/Gyc76C/Egfr/MED24/Mtl/CrebA/AdamTS-A/Abd-B/htl/unc-5/zip/caps/fz2/sli/trn/shg/crb/hid/retn/lolal/br/drl/fkh/Ser/trh/h/Utx/Rac2/LanB2/tsh/if/Pvf1/exd/Src42A/robo2/mew/Pvr/hth/Src64B/fra/NetB/scb/Pvf2/Atg17/raw/drpr/shn/fz/hdc/Wnt4/l(2)gl/robo1/rpr/betaTub85D/jeb/PH4alphaSG2/sigmar/p…
96	GO:0007169	transmembrane receptor protein tyrosine kinase signaling pathway	212	-0.391387	-1.66755	0.000175185	0.005157	0.00438346	4320	tags=59%, list=37%, signal=38%	raptor/ebi/Mkrn1/Socs16D/rho-5/rau/Pdk1/wdb/p130CAS/pbl/hppy/Pi3K21B/Lst8/kek1/dos/Pi3K92E/btl/vap/dlp/SkpA/rho/sima/mask/pum/Cbl/PRAS40/Dab/Dok/grh/aos/bnl/Egfr/CG3277/Mkp3/p53/Tor/Cul3/Sik3/grk/ImpL2/htl/Rap1/Cad96Ca/cdi/Ror/phyl/STUB1/Ced-12/wrd/ed/ttk/Rala/step/RasGAP1/Nrk/spi/Gug/hep/drl/fkh/Egfrap/dally/csw/Reph/Graf/dlg1/Cul1/HDAC4/mop/Akt/Tl/tor/Pvf1/stumps/Pi3K68D/Src42A/chico/Lar/rictor…
95	GO:0034660	ncRNA metabolic process	380	0.34998	1.59384	0.000163401	0.00486076	0.00413166	4115	tags=48%, list=35%, signal=33%	CG15930/Kots/aub/blanks/CG10993/scu/Fib/CG2006/CG6999/SoYb/Polr1E/CG32706/Tsen15/mael/RpL10Ab/CG8097/del/mdlc/RpS8/Rrp40/cuff/Rbm13/mldr/Ddx1/CG32409/Tcs4/RtcB/CG15014/CG40813/CG9107/wuho/CG11858/CG41562/IntS14/RpS16/CG6833/RpS21/Dph3/dbe/La/Cbp20/SerRS/mtTFB1/CG14543/GatC/RpL7A/Sas10/CG11417/Polr2E/CG10189/RpL35/CG3587/CG31249/RpL7/CG6712/ValRS-m/Rrp42/CG2260/TyrRS/CG8939/HisRS/rept/CG3527/IntS2…
94	GO:0051960	regulation of nervous system development	209	-0.397571	-1.69663	0.000126018	0.00378857	0.00322029	4068	tags=47%, list=35%, signal=31%	wit/Lrrk/Pi3K92E/btl/mid/Sidpn/SkpA/spartin/Ythdf/grh/Wnt5/wnd/aos/unk/hiw/Tor/dbo/sd/Syp/ana/Nf1/LanA/htl/Spn/aPKC/Hey/Nedd4/ed/repo/Sema2b/Ank2/E(spl)m3-HLH/Smox/nudE/nmo/spi/CG42638/Trpml/trio/Dad/tws/h/dlg1/kat-60L1/Akt/kibra/E(spl)mdelta-HLH/Sema1b/Src42A/babo/rictor/Sema5c/nub/Fak/ewg/Src64B/N/scb/pnt/Sema2a/sgg/nerfin-1/brat/PlexA/Liprin-gamma/G9a/SoxN/Itgbn/Antp/E(spl)m7-HLH/fz/stj/hdc/l(…
93	GO:0001751	compound eye photoreceptor cell differentiation	199	-0.406168	-1.71746	0.00012084	0.00367199	0.0031212	3899	tags=52%, list=33%, signal=35%	msk/wts/elB/klar/boi/tkv/rau/Dl/seq/Mbs/hop/put/dos/Cdc16/rho/Cam/mask/Cbl/Dab/grh/Blimp-1/msi/didum/ss/Egfr/fry/Atx2/pyd/Rap1/lola/ru/cdi/phyl/oc/vimar/ed/ttk/Rala/PIG-V/Smox/noc/RasGAP1/Nrk/Ire1/crb/Nct/ex/rno/br/csw/Amph/kibra/E(spl)mdelta-HLH/B-H2/Src42A/Ten-m/Lar/babo/vn/bdl/emc/Syn2/Kr-h1/AP-1sigma/sl/hth/Src64B/Doa/N/svp/pnt/amon/gl/tutl/fz/Pten/spg/myo/l(2)gl/rl/hbs/Alk/Smyd4-3/SP2353/aop…
92	GO:0042254	ribosome biogenesis	219	0.407158	1.7572	0.00011582	0.00355768	0.00302403	4359	tags=59%, list=37%, signal=38%	RpS5b/CG10993/RpS19b/Fib/CG9123/CG6999/CG32706/RpS14a/RpL10Ab/RpS19a/RpS9/RpS8/Rrp40/RpL34b/RpL26/RpS14b/Rbm13/CG32409/CG40813/CG9107/CG11858/CG41562/RpS16/Mrm2/CG6833/RpS21/dbe/RpS12/mtTFB1/CG14543/l(2)09851/RpL7A/Sas10/CG11417/mbm/RpLP0/RpS6/RpL35/RpL7/CG6712/RpS5a/Rrp42/CG2260/CG8939/RpL6/CG3527/CG3817/Non3/CG2972/RpS7/CG9166/Rrp4/CG7006/hoip/CG4038/RpL34a/RpS13/RpL14/Mettl5/RpS15/RpL23A/CG900…
91	GO:0001708	cell fate specification	100	-0.480817	-1.84268	0.000113545	0.00352614	0.00299722	4456	tags=65%, list=38%, signal=41%	dac/ara/msk/wts/pcs/tkv/Ubx/Dl/seq/wg/put/bon/btl/mid/rho/tup/S6kII/Egfr/Su(H)/Abd-B/htl/pyd/nkd/ed/ttk/fz2/Smox/tj/org-1/Dr/Apc/chm/bi/byn/dlg1/kibra/exd/robo2/E(spl)m6-BFM/abd-A/babo/vn/Brd/rn/CG9650/hth/N/H15/pnt/amon/Antp/ey/kn/fz/myo/l(2)gl/pyr/aop/chn/jeb/ths/bun/esg/sv/Actbeta
90	GO:0007420	brain development	122	-0.461442	-1.82589	8.68639e-05	0.00272753	0.0023184	3272	tags=51%, list=28%, signal=37%	ab/oc/Sema2b/Smox/cib/noc/Dr/ebo/shg/D/S-Lap1/Apc/enok/Dll/trio/Frl/toy/drl/DAAM/ccb/mud/exd/robo2/vvl/babo/Sema5c/vn/CG4853/RhoGAPp190/eas/orion/hth/ftz-f1/Src64B/vnd/Fas2/Appl/Sema2a/bsk/Ten-a/rg/brat/bwa/Dg/Ephrin/ey/Eph/myo/dati/Dscam1/stan/robo3/CG6083/bun/Hr3/PsGEF/Nipped-B/PlexB/lab/pros/LpR1/Actbeta
89	GO:0007189	adenylate cyclase-activating G protein-coupled receptor signaling pathway	42	-0.60873	-1.98646	8.34735e-05	0.00265052	0.00225294	2100	tags=57%, list=18%, signal=47%	CG32305/CG15556/ACXC/CG32301/dnc/CG7497/Dh31/ACXA/CG43373/rk/Octbeta1R/Ac3/Dop1R1/Dop1R2/AdoR/CG44153/5-HT7/ACXB/Lgr3/DopEcR/Octalpha2R/Pdfr/Octbeta3R/Lgr4
88	GO:0007157	heterophilic cell-cell adhesion via plasma membrane cell adhesion molecules	30	-0.669806	-1.99758	8.24738e-05	0.00264853	0.00225126	2838	tags=73%, list=24%, signal=56%	ft/kirre/if/ItgaPS4/beat-IIIc/mew/ds/beat-Vb/scb/Itgbn/ItgaPS5/hbs/sns/beat-IV/beat-IIb/beat-Ia/beat-IIIb/beat-VII/beat-IIa/beat-Ic/beat-Ib/beat-Va
87	GO:0009593	detection of chemical stimulus	30	-0.669835	-1.99767	8.24738e-05	0.00264853	0.00225126	1270	tags=47%, list=11%, signal=42%	Dscam1/Or2a/Ir40a/Ir51b/Gr64e/OtopLa/norpA/ATP8B/CheB42c/Gr64a/Gr64c/Ir76a/Or45b/Ir54a
86	GO:0051604	protein maturation	241	0.403728	1.75053	7.00646e-05	0.00231194	0.00196515	3214	tags=43%, list=27%, signal=32%	Hsp70Bb/PGRP-SC1a/PGRP-SC1b/PGRP-SC2/Hsp70Ab/Hsp70Aa/grass/psh/Cnx14D/Hsp68/CG32857/PGRP-SA/spirit/cer/sphe/l(2)efl/wbl/CG7872/CG1924/CG17266/CG1847/Spg7/CG5131/Hsp60A/Hsp27/Grx5/DnaJ-60/26-29-p/ea/Spase12/Hsp26/ppl/Nep2/ND-ACP/Cypl/CG7182/Hsp83/mgr/nero/CG2852/twr/CG2887/vnc/CG11999/MagR/boca/Pfdn5/CCT3/CCT5/DnaJ-1/Spp/Fkbp59/CCT8/Spase22-23/GNBP3/Pfdn4/CG11110/Dpit47/CG5504/CCT6/galla-1/CG9804/…
85	GO:0040017	positive regulation of locomotion	68	-0.540183	-1.93467	7.03563e-05	0.00231194	0.00196515	3422	tags=62%, list=29%, signal=44%	grk/CG17118/htl/unc-5/zip/ttk/Sema2b/sli/kis/shg/spi/hep/Akt/Sema1b/Pvf1/puc/Rme-8/robo2/chico/Ten-m/Sema5c/vn/spri/Pvf3/Pvr/sl/fra/Krn/Pvf2/Sema2a/bsk/Ten-a/kuz/robo1/mbc/ena/Dscam1/InR/aop/ths/Sema1a/slbo
84	GO:0048729	tissue morphogenesis	349	-0.359096	-1.60508	6.8383e-05	0.0023006	0.00195551	4060	tags=49%, list=35%, signal=33%	Dhc64C/Mbs/hop/put/Eip63E/Gbeta13F/btl/in/bs/sna/msn/Cds/frtz/rho/par-1/mys/Rab23/mask/tup/Cbl/Dab/Dok/grh/srp/sqd/fj/Ppcs/aos/stac/bnl/Gyc76C/Egfr/Mkp3/Mtl/Tor/spoon/baz/grk/Cul2/sca/Pkn/htl/18w/POSH/pyd/Mcr/Rap1/lola/TSG101/par-6/aPKC/zip/ph-p/caps/Ack-like/ed/Drak/ttk/Rala/knk/step/sli/noc/trn/Traf4/shg/Hipk/nmo/spi/crb/Nost/hep/Frl/tow/cno/fkh/LanB1/Dad/ft/Tollo/csw/trh/byn/Rac2/dlg1/Nrx-IV/m…
83	GO:2000026	regulation of multicellular organismal development	269	-0.383741	-1.6698	6.55461e-05	0.00223172	0.00189697	4068	tags=47%, list=35%, signal=31%	wit/Lrrk/hop/Pi3K92E/Gbeta13F/btl/mid/msn/Sidpn/SkpA/spartin/par-1/Arp53D/Ythdf/Usp2/Dok/grh/Wnt5/wnd/aos/unk/hiw/Mtl/Tor/dbo/sd/Syp/ana/Nf1/LanA/htl/pyd/Rap1/Spn/aPKC/Hey/Nedd4/ed/ttk/repo/Sema2b/Ank2/E(spl)m3-HLH/Smox/nudE/nmo/spi/CG42638/Trpml/trio/Dad/Ser/tws/h/Rac2/dlg1/kat-60L1/Akt/kibra/E(spl)mdelta-HLH/Sema1b/Src42A/hzg/babo/rictor/Sema5c/nub/RhoGEF2/cta/Fak/ewg/Src64B/N/scb/pnt/Sema2a/sg…
82	GO:0016358	dendrite development	171	-0.427957	-1.76525	6.23686e-05	0.00214943	0.00182702	4109	tags=50%, list=35%, signal=33%	Snoo/ems/wit/Dhc64C/Lrrk/Pi3K92E/dom/Nrg/pum/tup/Wnt5/sqz/ss/fry/Tor/cnc/Cul3/lola/ab/Nedd4/ttk/Rfx/Sema2b/Smox/sli/Nak/D/nudE/babos/Ulp1/hid/retn/Hecw/br/drl/dally/kat-60L1/Akt/vvl/babo/rictor/nub/Hand/jim/cv-c/p120ctn/ftz-f1/fra/NetB/fs(1)h/comm/S6k/Sema2a/Ptp69D/pho/sn/G9a/tutl/kn/shn/mav/Pten/fru/robo1/gcm2/cwo/ena/Dscam1/stan/chn/ci/scro/pira/ct/Toll-6/Sema1a/path/pros/unc-104/dar1/CadN/Ret/…
81	GO:2000147	positive regulation of cell motility	64	-0.563712	-1.98841	5.88327e-05	0.00205261	0.00174472	3422	tags=62%, list=29%, signal=45%	grk/CG17118/htl/unc-5/zip/ttk/Sema2b/sli/kis/shg/spi/hep/Akt/Sema1b/Pvf1/puc/Rme-8/robo2/chico/Sema5c/vn/spri/Pvf3/Pvr/sl/fra/Krn/Pvf2/Sema2a/bsk/kuz/robo1/mbc/ena/Dscam1/InR/aop/ths/Sema1a/slbo
80	GO:0040012	regulation of locomotion	121	-0.465902	-1.84716	5.56809e-05	0.00196693	0.00167189	3938	tags=60%, list=34%, signal=41%	msn/par-1/sima/mys/Rap2l/Cbl/Wnt5/bnl/Egfr/Tor/Sin3A/grk/Evi5/CG17118/LanA/htl/lola/unc-5/zip/ptc/ttk/Sema2b/sli/kis/shg/spi/hep/LRP1/CASK/Akt/Sema1b/Pvf1/puc/Rme-8/robo2/chico/Ten-m/Sema5c/vn/spri/Nrx-1/Pvf3/Pvr/Ktl/sl/fra/NetB/Krn/scb/Pvf2/S6k/Sema2a/bsk/Ten-a/kuz/PlexA/fz/Pten/Trim9/robo1/mbc/ena/Dscam1/InR/aop/stan/ths/Tbh/Sema1a/ple/PlexB/slbo/unc-104
77	GO:0042274	ribosomal small subunit biogenesis	73	0.585291	2.11472	5.31715e-05	0.00193572	0.00164537	2880	tags=53%, list=25%, signal=41%	RpS5b/CG10993/RpS19b/CG6999/CG32706/RpS14a/RpS19a/RpS9/RpS8/RpS14b/CG32409/CG40813/CG9107/CG41562/RpS16/RpS21/RpS12/CG14543/Sas10/mbm/RpS6/RpS5a/CG2260/CG3527/CG2972/RpS7/hoip/RpS13/RpS15/CG9004/ais/CG8064/CG7246/CG7728/Surf6/RpS28b/LTV1/sta/CG11123
78	GO:0042335	cuticle development	161	0.456427	1.86783	5.41126e-05	0.00193572	0.00164537	1163	tags=27%, list=10%, signal=25%	Cpr76Bc/TwdlX/Cpr49Ab/Lcp65Ad/Vajk2/Cpr65Aw/Cpr65Au/Vajk3/obst-E/Vajk1/Cpr49Ah/Lcp65Ab1/Lcp9/Lcp65Ac/Pu/Cpr62Bc/Cpr66Cb/Cpr11B/FASN2/Cpr67Fa2/Idgf5/Pcp/Lcp1/TwdlG/Ddc/Cpr11A/Cpr100A/Lcp3/Idgf6/Cpr92F/Cpr47Ec/Cpr49Af/Lcp2/Cpr60D/Cpr78E/Lcp65Aa/t/Cpr78Ca/Idgf4/p38c/Cpr97Ea/obst-A/Cpr65Ec/Sec13
79	GO:0060322	head development	141	-0.456594	-1.83138	5.38246e-05	0.00193572	0.00164537	3272	tags=49%, list=28%, signal=36%	ab/oc/Sema2b/Smox/cib/noc/Dr/ebo/shg/D/S-Lap1/Apc/enok/Dll/trio/Frl/toy/drl/DAAM/ccb/h/tsh/jing/mud/exd/robo2/vvl/babo/Sema5c/vn/CG4853/RhoGAPp190/eas/orion/hth/ftz-f1/Src64B/vnd/Fas2/tio/Appl/alpha-Cat/Sema2a/bsk/Ten-a/rg/brat/bwa/Antp/Dg/Ephrin/ey/Eph/kn/myo/dati/Dscam1/stan/robo3/CG6083/bun/Hr3/PsGEF/Nipped-B/PlexB/lab/pros/LpR1/Actbeta
76	GO:0001745	compound eye morphogenesis	310	-0.37439	-1.65396	4.79538e-05	0.00178313	0.00151566	4586	tags=53%, list=39%, signal=33%	Afti/rumi/PDZ-GEF/mts/Tao/Asap/klu/Dronc/dac/aux/ara/Smyd4-4/trr/arr/msk/wts/elB/klar/d/boi/tkv/Cyfip/rau/Dl/seq/vg/wg/Strica/Mbs/hop/put/dos/btl/Arf6/Cdc16/eyg/rho/Cam/mask/Cbl/Dab/grh/Blimp-1/S6kII/msi/didum/fj/aos/bnl/ss/Egfr/fry/Mtl/Atx2/Su(H)/faf/sd/Cul3/M6/sca/pyd/Rap1/lola/ru/cdi/aPKC/phyl/oc/vimar/ed/ttk/Rala/smo/PIG-V/Smox/noc/RasGAP1/Nrk/Ire1/shg/nmo/spi/crb/Apc/Nct/ex/rno/Frl/cno/bi/br…
75	GO:0001754	eye photoreceptor cell differentiation	204	-0.411506	-1.74909	4.39118e-05	0.0016546	0.00140641	3899	tags=46%, list=33%, signal=31%	Cdc16/rho/Cam/mask/Cbl/Dab/grh/Blimp-1/msi/didum/ss/Egfr/fry/Atx2/pyd/Rap1/lola/ru/cdi/phyl/oc/vimar/ed/ttk/Rala/PIG-V/Smox/noc/RasGAP1/Nrk/Ire1/crb/Nct/ex/rno/br/csw/Amph/kibra/E(spl)mdelta-HLH/B-H2/Src42A/Ten-m/Lar/babo/yrt/vn/bdl/emc/Syn2/Kr-h1/AP-1sigma/sl/hth/Src64B/Doa/N/svp/pnt/amon/rg/gl/tutl/fz/Pten/spg/myo/l(2)gl/rl/tinc/hbs/Alk/Smyd4-3/SP2353/aop/tau/stan/CadN2/jeb/sty/klg/bun/Hr3/Smyd…
74	GO:0030335	positive regulation of cell migration	62	-0.56652	-2.001	3.74602e-05	0.00143058	0.00121599	3422	tags=63%, list=29%, signal=45%	grk/htl/unc-5/zip/ttk/Sema2b/sli/kis/shg/spi/hep/Akt/Sema1b/Pvf1/puc/Rme-8/robo2/chico/Sema5c/vn/spri/Pvf3/Pvr/sl/fra/Krn/Pvf2/Sema2a/bsk/kuz/robo1/mbc/ena/Dscam1/InR/aop/ths/Sema1a/slbo
73	GO:0007472	wing disc morphogenesis	285	-0.38163	-1.67204	3.67424e-05	0.00142239	0.00120903	4459	tags=54%, list=38%, signal=34%	tok/cic/dve/px/ara/Ilk/arr/how/fog/msk/osa/Fhos/ebi/d/tkv/fbl/Dl/Dys/vg/wg/Mbs/hop/put/Gprk2/Asx/in/bs/svr/dlp/Arf6/frtz/rho/Galphas/par-1/mys/Mrtf/cg/Cbl/Dok/pygo/S6kII/fj/Ppcs/aos/unk/Egfr/ap/Mkp3/fry/disco-r/Mtl/Su(H)/sbb/sd/Cul3/lgs/grk/sca/Pkn/Rap1/ltl/zip/ptc/Nedd4/ed/Drak/smo/step/fz2/Smox/kis/Dr/RasGAP1/Gclc/Timp/shg/dy/Hipk/nmo/spi/Nost/Gug/l(2)gd1/Dll/tow/bi/Rbfox1/Stat92E/LanB1/Dad/ft/…
72	GO:0040011	locomotion	226	-0.40293	-1.73071	3.25549e-05	0.00127778	0.00108611	3467	tags=50%, list=30%, signal=36%	Sin3A/M6/grk/Evi5/slgA/CG17118/CG6867/wun2/LanA/htl/lola/atk/unc-5/zip/ptc/ttk/Sema2b/fz2/sli/kis/yuri/Timp/shg/Hipk/nmo/spi/hep/br/drl/Rac2/dlg1/CarT/LRP1/CASK/l(3)L1231/Akt/Stacl/Tl/Sema1b/tor/Pvf1/puc/Rme-8/robo2/chico/Ten-m/TrpA1/Sema5c/beat-IIIc/vn/Sulf1/spri/Nrx-1/Ptth/Syn1/Syn2/pain/orion/Pvf3/Pvr/Ktl/sl/fra/NetB/Krn/shep/svp/scb/Pvf2/Nmdar1/lap/S6k/Sema2a/bsk/Ten-a/Ptp69D/kuz/PlexA/Msp300…
71	GO:0007476	imaginal disc-derived wing morphogenesis	272	-0.387851	-1.69212	2.88252e-05	0.00114733	0.000975228	4459	tags=55%, list=38%, signal=35%	tok/cic/dve/px/ara/Ilk/arr/how/fog/msk/osa/Fhos/ebi/d/tkv/fbl/Dl/Dys/vg/wg/Mbs/put/Gprk2/Asx/in/bs/svr/dlp/Arf6/frtz/rho/Galphas/par-1/mys/Mrtf/cg/Cbl/Dok/pygo/S6kII/fj/Ppcs/aos/unk/Egfr/ap/Mkp3/fry/disco-r/Mtl/Su(H)/sbb/sd/Cul3/lgs/grk/sca/Rap1/ltl/zip/ptc/Nedd4/ed/Drak/smo/step/fz2/Smox/kis/Dr/RasGAP1/Gclc/Timp/shg/dy/Hipk/nmo/spi/Nost/Gug/l(2)gd1/Dll/tow/bi/Rbfox1/LanB1/Dad/ft/Hs6st/dally/Ser/…
70	GO:0007167	enzyme-linked receptor protein signaling pathway	282	-0.386031	-1.68975	2.77601e-05	0.00112072	0.00095261	4320	tags=55%, list=37%, signal=36%	raptor/ebi/Mkrn1/Nplp1/Socs16D/tkv/rho-5/rau/Pdk1/wdb/p130CAS/pbl/hppy/Pi3K21B/Snoo/Lst8/wit/put/kek1/dos/Pi3K92E/btl/vap/dlp/SkpA/rho/spartin/sima/mask/pum/Cbl/PRAS40/Dab/Dok/grh/S6kII/aos/bnl/Gyc76C/Egfr/CG3277/Mkp3/hiw/p53/Tor/faf/Cul3/Sik3/grk/Cul2/ImpL2/htl/Rap1/Cad96Ca/ltl/cdi/Ror/phyl/STUB1/Ced-12/wrd/ed/ttk/Rala/step/Smox/RasGAP1/Nrk/spi/Gug/hep/drl/fkh/Egfrap/Dad/dally/csw/Reph/Graf/dlg1…
69	GO:0007416	synapse assembly	173	-0.434077	-1.78979	2.64423e-05	0.00108298	0.000920539	3587	tags=47%, list=31%, signal=33%	hiw/Tor/dbo/baz/Syp/Nf1/Cul2/beta-Spec/LanA/htl/Spn/par-6/aPKC/caps/Rab8/Nedd4/repo/Ank2/Prosap/kis/nmo/Nos/CG42638/Trpml/alpha-Spec/trio/drl/Dad/Nlg1/dlg1/Nrx-IV/CASK/Akt/Tl/Imp/Src42A/Ten-m/Lar/rictor/Nrx-1/Fak/Syn1/Syn2/ewg/Src64B/Fas2/comm/scb/Nlg4/S6k/CaMKII/sgg/Ten-a/brat/stai/metro/Liprin-gamma/Nlg3/Itgbn/Gad1/PIP5K59B/stj/Syx4/Syn/ena/Galphao/plum/stan/jeb/Cals/Octbeta1R/Sema1a/pros/Fife/…
68	GO:0048065	male courtship behavior, veined wing extension	17	-0.791357	-2.05693	1.9707e-05	0.000818999	0.00069615	1556	tags=53%, list=13%, signal=46%	fru/btv/5-HT7/cac/Nlg2/fipi/FoxP/para/y
67	GO:0048737	imaginal disc-derived appendage development	330	-0.380552	-1.70074	1.93031e-05	0.000814189	0.000692062	4459	tags=55%, list=38%, signal=35%	tok/dac/cic/dve/px/ara/Ilk/arr/how/RhoGAP68F/fog/msk/elB/osa/Fhos/ebi/Alh/d/tkv/fbl/Ubx/sob/Dl/l(3)psg2/Dys/vg/wg/CG42674/Mbs/put/Gprk2/Asx/in/bs/CG43658/svr/dlp/Arf6/frtz/eyg/rho/Galphas/par-1/mys/Mrtf/RhoGAP19D/cg/RhoGAP54D/Cbl/Sp1/Dok/pygo/S6kII/fj/Ppcs/aos/unk/ss/Egfr/ap/Mkp3/fry/disco-r/Mtl/Su(H)/Pura/sbb/sd/Cul3/lgs/dan/grk/sca/danr/Rap1/ltl/zip/ptc/Nedd4/ed/Drak/smo/step/fz2/Smox/kis/Dr/Ra…
66	GO:0040007	growth	438	-0.345405	-1.58846	1.85035e-05	0.000792286	0.000673445	3896	tags=45%, list=33%, signal=31%	SkpA/spartin/par-1/sima/mys/cup/Nrg/Lk6/pum/Ythdf/CG9328/Dok/pygo/RNaseZ/Wnt5/wnd/fj/Egfr/hiw/p53/disco-r/Mtl/Tor/Mnt/dbo/baz/sbb/Syp/Nf1/Cul2/beta-Spec/LanA/htl/18w/Rassf/TSG101/Rab8/ttk/repo/Sema2b/Ank2/hyd/step/fz2/Prosap/Smox/kis/PNUTS/Timp/pico/Ire1/shg/Hipk/nmo/Nos/crb/hid/ex/hep/slif/CG42638/Trpml/alpha-Spec/trio/Frl/bi/fkh/Stat92E/Dad/ft/Hs6st/Nlg1/Tollo/dally/DAAM/poe/Rac2/dlg1/tra/CASK/…
65	GO:0016477	cell migration	310	-0.385183	-1.70164	1.57063e-05	0.000682863	0.000580435	4186	tags=54%, list=36%, signal=36%	Dl/Fpps/p130CAS/pbl/stl/sosie/CG42674/Dhc64C/hop/Pi3K92E/Gbeta13F/btl/msn/dlp/par-1/sima/mys/Mrtf/cup/oys/mask/pum/slam/Rap2l/Cbl/srp/sqd/Ppcs/Tre1/bnl/CalpB/Egfr/Mtl/spoon/AdamTS-A/faf/baz/Sin3A/Abd-B/grk/Evi5/disp/wun2/LanA/htl/18w/Rap1/opa/ru/ab/par-6/unc-5/zip/ptc/knrl/Ced-12/caps/mim/zfh1/ttk/Sema2b/Rala/fz2/tj/sli/kis/trn/shg/nudE/spi/Apc/chb/GMF/ex/hep/Frl/BicC/CG7565/Stat92E/LanB1/Dad/dal…
64	GO:0007186	G protein-coupled receptor signaling pathway	191	-0.431427	-1.81506	1.52739e-05	0.000674437	0.000573272	2429	tags=43%, list=21%, signal=35%	CG12290/RhoGEF2/cta/stops/CG42450/TkR99D/GABA-B-R2/Dh44-R2/mthl5/CG32305/mthl10/CG15556/CG43795/Proc-R/Gbp1/ACXC/mAChR-A/CG32301/Gycalpha99B/dnc/mthl15/Galphaq/smog/fz/mthl2/mtt/CG7497/Dh31/MsR1/ACXA/Proc/Ggamma30A/mthl14/Galphao/CG43373/rk/CCHa1-R/Crz/NPF/Gprk1/CG31140/stan/5-HT1A/CG32683/ninaC/AstC-R2/sNPF/Octbeta1R/Tbh/Ac3/CG13579/PK2-R1/Dop1R1/Dop1R2/sNPF-R/AdoR/GABA-B-R1/CG43324/dcma/SIFaR/C…
63	GO:0034329	cell junction assembly	227	-0.413299	-1.77507	1.41992e-05	0.000636935	0.000541396	3494	tags=53%, list=30%, signal=38%	tkv/Ssk/Adf1/Pdk1/Galphai/Tsf2/wg/wit/Pi3K92E/btl/kune/moody/SkpA/spartin/par-1/cup/Nrg/pum/wnd/kst/hiw/Tor/dbo/baz/Syp/M6/Nf1/Cul2/beta-Spec/LanA/htl/pyd/Mcr/Rap1/Spn/par-6/aPKC/caps/Rab8/Nedd4/repo/Ank2/Prosap/kis/shg/nmo/Nos/crb/CG42638/Trpml/alpha-Spec/trio/pasi1/drl/Dad/Nlg1/kirre/dlg1/Nrx-IV/CASK/Akt/Tl/Imp/sinu/Src42A/Ten-m/Lar/rictor/Cont/Nrx-1/Fak/Syn1/Syn2/p120ctn/ewg/Src64B/Fas2/comm/s…
62	GO:0007188	adenylate cyclase-modulating G protein-coupled receptor signaling pathway	59	-0.588	-2.05848	1.39335e-05	0.000635099	0.000539835	2429	tags=61%, list=21%, signal=49%	CG12290/cta/GABA-B-R2/Dh44-R2/CG32305/CG15556/ACXC/mAChR-A/CG32301/dnc/Galphaq/CG7497/Dh31/MsR1/ACXA/Galphao/CG43373/rk/5-HT1A/Octbeta1R/Ac3/Dop1R1/Dop1R2/AdoR/GABA-B-R1/5-HT1B/CG44153/5-HT7/ACXB/Lgr3/DopEcR/Octalpha2R/Pdfr/Octbeta3R/CG17760/Lgr4
61	GO:0007552	metamorphosis	466	-0.350732	-1.62001	1.2058e-05	0.000603363	0.00051286	4459	tags=53%, list=38%, signal=34%	tok/dac/cic/dve/px/ara/Ilk/Eip74EF/arr/how/RhoGAP68F/stg/fog/msk/Dif/osa/Fhos/raptor/Cyp301a1/ebi/Ubi-p63E/d/tkv/fbl/Ubx/sob/Dl/l(3)psg2/Dys/vg/wg/dap/drosha/CG42674/Strica/Mbs/hop/put/Gprk2/Pi3K92E/Asx/Eip63E/Myo31DF/in/bs/nvd/CG43658/svr/msn/dlp/Arf6/frtz/rho/Galphas/par-1/mys/Mrtf/RhoGAP19D/cg/Nrg/Cam/RhoGAP54D/Atg2/Cbl/Sp1/Dok/pygo/S6kII/Trf2/IP3K2/Itpr/fj/Ppcs/Atg5/aos/unk/ss/Egfr/ap/Mkp3/fr…
59	GO:0048592	eye morphogenesis	320	-0.380741	-1.69262	1.30238e-05	0.000603363	0.00051286	4586	tags=54%, list=39%, signal=34%	Afti/rumi/PDZ-GEF/mts/Tao/Asap/klu/Dronc/dac/cic/aux/ara/Smyd4-4/trr/arr/msk/wts/elB/klar/d/boi/tkv/Cyfip/rau/Dl/seq/vg/wg/Strica/Mbs/hop/put/dos/btl/Arf6/Cdc16/eyg/rho/Cam/mask/Cbl/Dab/grh/Blimp-1/S6kII/msi/didum/fj/aos/bnl/ss/Egfr/fry/Mtl/Atx2/Su(H)/faf/sd/Cul3/M6/sca/pyd/Rap1/lola/ru/cdi/aPKC/phyl/ptc/oc/vimar/ed/ttk/Rala/smo/PIG-V/Smox/noc/RasGAP1/Nrk/Ire1/shg/nmo/spi/crb/Apc/Nct/ex/rno/Frl/c…
60	GO:0090596	sensory organ morphogenesis	320	-0.380741	-1.69262	1.30238e-05	0.000603363	0.00051286	4586	tags=54%, list=39%, signal=34%	Afti/rumi/PDZ-GEF/mts/Tao/Asap/klu/Dronc/dac/cic/aux/ara/Smyd4-4/trr/arr/msk/wts/elB/klar/d/boi/tkv/Cyfip/rau/Dl/seq/vg/wg/Strica/Mbs/hop/put/dos/btl/Arf6/Cdc16/eyg/rho/Cam/mask/Cbl/Dab/grh/Blimp-1/S6kII/msi/didum/fj/aos/bnl/ss/Egfr/fry/Mtl/Atx2/Su(H)/faf/sd/Cul3/M6/sca/pyd/Rap1/lola/ru/cdi/aPKC/phyl/ptc/oc/vimar/ed/ttk/Rala/smo/PIG-V/Smox/noc/RasGAP1/Nrk/Ire1/shg/nmo/spi/crb/Apc/Nct/ex/rno/Frl/c…
58	GO:0046530	photoreceptor cell differentiation	226	-0.413087	-1.77434	1.2544e-05	0.000603363	0.00051286	4354	tags=53%, list=37%, signal=34%	msk/wts/elB/osa/ebi/klar/boi/tkv/rau/Dl/seq/Mbs/hop/put/dos/msn/Cdc16/rho/Cam/mask/Cbl/Dab/grh/Blimp-1/S6kII/msi/didum/ss/Egfr/fry/p53/Atx2/baz/pyd/Rap1/lola/ru/cdi/phyl/oc/vimar/ed/ttk/Rala/PIG-V/Smox/noc/RasGAP1/Nrk/Ire1/spi/crb/Nct/ex/rno/Bsg/br/csw/Amph/mop/kibra/E(spl)mdelta-HLH/B-H2/Src42A/Ten-m/Lar/babo/yrt/vn/bdl/edl/emc/Syn2/Kr-h1/AP-1sigma/sl/hth/Src64B/Doa/N/svp/sdk/pnt/amon/cnn/rg/gl/…
56	GO:0050804	modulation of chemical synaptic transmission	142	-0.47601	-1.91633	1.27701e-05	0.000603363	0.00051286	2832	tags=46%, list=24%, signal=36%	Nlg1/Dyb/Sap47/CASK/Ekar/CG6329/mop/Akt/Src42A/Cbp53E/chico/CG7781/Rab3-GAP/Exn/Nrx-1/cv-c/PGRP-LC/TkR99D/Src64B/Fas2/GABA-B-R2/Nlg4/sky/Rab3/NFAT/Csk/CaMKII/Pka-C1/CG11155/Nlg3/Dg/na/GluRIIB/Galphaq/Pten/rl/kek6/Alk/rt/GluRIB/Sol1/jeb/Syt4/Cals/Frq2/VGlut/Shab/Toll-6/brp/CG1909/Slob/Fife/KaiR1D/cac/Nlg2/cpx/Nmdar2/Rim/FMRFaR/Rdl/Snap25/dysc/mGluR/Sh/qvr/Frq1
57	GO:0099177	regulation of trans-synaptic signaling	142	-0.47601	-1.91633	1.27701e-05	0.000603363	0.00051286	2832	tags=46%, list=24%, signal=36%	Nlg1/Dyb/Sap47/CASK/Ekar/CG6329/mop/Akt/Src42A/Cbp53E/chico/CG7781/Rab3-GAP/Exn/Nrx-1/cv-c/PGRP-LC/TkR99D/Src64B/Fas2/GABA-B-R2/Nlg4/sky/Rab3/NFAT/Csk/CaMKII/Pka-C1/CG11155/Nlg3/Dg/na/GluRIIB/Galphaq/Pten/rl/kek6/Alk/rt/GluRIB/Sol1/jeb/Syt4/Cals/Frq2/VGlut/Shab/Toll-6/brp/CG1909/Slob/Fife/KaiR1D/cac/Nlg2/cpx/Nmdar2/Rim/FMRFaR/Rdl/Snap25/dysc/mGluR/Sh/qvr/Frq1
55	GO:0035114	imaginal disc-derived appendage morphogenesis	323	-0.380479	-1.69346	1.06135e-05	0.000550547	0.000467966	4459	tags=54%, list=38%, signal=35%	tok/dac/cic/dve/px/ara/Ilk/arr/how/RhoGAP68F/fog/msk/osa/Fhos/ebi/d/tkv/fbl/Ubx/sob/Dl/l(3)psg2/Dys/vg/wg/CG42674/Mbs/put/Gprk2/Asx/in/bs/CG43658/svr/dlp/Arf6/frtz/eyg/rho/Galphas/par-1/mys/Mrtf/RhoGAP19D/cg/RhoGAP54D/Cbl/Sp1/Dok/pygo/S6kII/fj/Ppcs/aos/unk/ss/Egfr/ap/Mkp3/fry/disco-r/Mtl/Su(H)/Pura/sbb/sd/Cul3/lgs/dan/grk/sca/danr/Rap1/ltl/zip/ptc/Nedd4/ed/Drak/smo/step/fz2/Smox/kis/Dr/RasGAP1/Gc…
54	GO:0048736	appendage development	333	-0.383868	-1.71605	1.07148e-05	0.000550547	0.000467966	4459	tags=55%, list=38%, signal=35%	tok/dac/cic/dve/px/ara/Ilk/arr/how/RhoGAP68F/fog/msk/elB/osa/Fhos/ebi/Alh/d/tkv/fbl/Ubx/sob/Dl/l(3)psg2/Dys/vg/wg/CG42674/Mbs/put/Gprk2/Asx/in/bs/CG43658/svr/dlp/Arf6/frtz/eyg/rho/Galphas/par-1/mys/Mrtf/RhoGAP19D/cg/RhoGAP54D/Cbl/Sp1/Dok/pygo/S6kII/fj/Ppcs/aos/unk/ss/Egfr/ap/Mkp3/fry/disco-r/Mtl/Su(H)/Pura/sbb/sd/Cul3/lgs/dan/grk/sca/danr/Rap1/ltl/zip/ptc/Nedd4/ed/Drak/smo/step/fz2/Smox/kis/Dr/Ra…
53	GO:0035107	appendage morphogenesis	325	-0.382761	-1.70488	7.94758e-06	0.000423771	0.000360206	4459	tags=55%, list=38%, signal=35%	tok/dac/cic/dve/px/ara/Ilk/arr/how/RhoGAP68F/fog/msk/osa/Fhos/ebi/d/tkv/fbl/Ubx/sob/Dl/l(3)psg2/Dys/vg/wg/CG42674/Mbs/put/Gprk2/Asx/in/bs/CG43658/svr/dlp/Arf6/frtz/eyg/rho/Galphas/par-1/mys/Mrtf/RhoGAP19D/cg/RhoGAP54D/Cbl/Sp1/Dok/pygo/S6kII/fj/Ppcs/aos/unk/ss/Egfr/ap/Mkp3/fry/disco-r/Mtl/Su(H)/Pura/sbb/sd/Cul3/lgs/dan/grk/sca/danr/Rap1/ltl/zip/ptc/Nedd4/ed/Drak/smo/step/fz2/Smox/kis/Dr/RasGAP1/Gc…
52	GO:0048870	cell motility	372	-0.371419	-1.67751	7.48246e-06	0.000406643	0.000345647	3885	tags=50%, list=33%, signal=35%	par-1/sima/mys/Mrtf/cup/oys/mask/pum/slam/Rap2l/Cbl/srp/sqd/Ppcs/Tre1/bnl/CalpB/Egfr/Mtl/spoon/AdamTS-A/faf/baz/CG10510/Sin3A/Abd-B/grk/Evi5/CG17118/disp/wun2/LanA/htl/18w/Rap1/mmm/opa/ru/ab/orb2/par-6/unc-5/zip/ptc/knrl/Ced-12/caps/mim/Plp/zfh1/ttk/Sema2b/Dhc16F/Rala/fz2/tj/sli/kis/trn/shg/nudE/spi/Apc/chb/GMF/ex/hep/Frl/BicC/CG7565/Stat92E/LanB1/Dad/dally/csw/Hem/Dhc62B/byn/Rac2/CASK/ana1/jing/…
51	GO:0048749	compound eye development	371	-0.373584	-1.68828	6.12321e-06	0.000339298	0.000288404	4270	tags=48%, list=36%, signal=32%	klar/d/boi/tkv/Cyfip/rau/Dl/seq/vg/wg/Strica/Mbs/hop/put/dos/btl/sna/dlp/Arf6/Cdc16/eyg/rho/Cam/mask/Cbl/Dab/grh/Blimp-1/S6kII/msi/didum/Skp2/fj/aos/unk/bnl/ss/Egfr/fry/Mtl/Atx2/AP-1gamma/Su(H)/faf/sd/Cul3/M6/dan/sca/pyd/danr/Rap1/lola/ru/cdi/aPKC/phyl/oc/vimar/toe/ed/ttk/Rala/smo/PIG-V/Smox/noc/CkIIalpha/RasGAP1/Nrk/Ire1/shg/Hipk/nmo/spi/crb/Apc/Nct/ex/l(2)gd1/rno/Frl/cno/toy/bi/br/ft/dally/Ser/…
50	GO:0035120	post-embryonic appendage morphogenesis	314	-0.383103	-1.69715	5.82685e-06	0.000329333	0.000279934	4459	tags=55%, list=38%, signal=35%	tok/cic/dve/px/ara/Ilk/arr/how/RhoGAP68F/fog/msk/osa/Fhos/ebi/d/tkv/fbl/Ubx/sob/Dl/l(3)psg2/Dys/vg/wg/CG42674/Mbs/put/Gprk2/Asx/in/bs/CG43658/svr/dlp/Arf6/frtz/rho/Galphas/par-1/mys/Mrtf/RhoGAP19D/cg/RhoGAP54D/Cbl/Sp1/Dok/pygo/S6kII/fj/Ppcs/aos/unk/ss/Egfr/ap/Mkp3/fry/disco-r/Mtl/Su(H)/Pura/sbb/sd/Cul3/lgs/grk/sca/Rap1/ltl/zip/ptc/Nedd4/ed/Drak/smo/step/fz2/Smox/kis/Dr/RasGAP1/Gclc/Timp/shg/dy/Hi…
49	GO:0007528	neuromuscular junction development	182	-0.447617	-1.86197	5.60538e-06	0.000323282	0.00027479	4068	tags=55%, list=35%, signal=36%	wit/Lrrk/put/Pi3K92E/btl/l(3)neo38/cin/dlp/SkpA/spartin/Galphas/par-1/cup/pum/S6kII/wnd/hiw/Tor/dbo/Syp/Nf1/Cul2/beta-Spec/LanA/htl/wrd/Rab8/Nedd4/C1GalTA/repo/Ank2/Prosap/kis/nmo/CG42638/Trpml/alpha-Spec/trio/Dad/Nlg1/Hem/dlg1/CASK/Akt/rut/Imp/Src42A/Ten-m/Lar/rictor/Nrx-1/Fak/Syn1/Syn2/ewg/Src64B/Fas2/scb/S6k/CaMKII/sgg/Ten-a/rg/brat/stai/metro/Liprin-gamma/drpr/Nlg3/Itgbn/Gad1/PIP5K59B/mav/stj…
48	GO:0007156	homophilic cell adhesion via plasma membrane adhesion molecules	48	-0.636212	-2.13169	5.33271e-06	0.000313963	0.000266869	3391	tags=81%, list=29%, signal=58%	ImpL2/Cad96Ca/caps/ed/shg/Bsg/Cad74A/ft/kirre/Cad96Cb/Lar/Cont/bdl/CG13506/otk/ds/Cad86C/Fas2/sdk/Cad87A/tutl/Fas1/fz/CG7166/hbs/CG34353/sns/Con/Dscam1/stan/CadN2/klg/Cals/Dscam3/Dscam2/chp/Cad88C/CadN/kug
47	GO:0019098	reproductive behavior	108	-0.525492	-2.03722	4.1327e-06	0.00024849	0.000211217	1556	tags=32%, list=13%, signal=28%	fru/Dh31/dati/Syn/Gr93d/btv/Dnah3/Crz/NPF/InR/5-HT1A/Adar/mil/bol/Tbh/SIFaR/ple/Gr77a/5-HT7/pros/cac/Nlg2/fipi/fne/Oamb/mbl/Esp/FoxP/mGluR/Gr39a/lobo/Sh/IBIN/para/y
46	GO:0048589	developmental growth	369	-0.380806	-1.71485	3.16001e-06	0.000194134	0.000165015	3896	tags=46%, list=33%, signal=32%	SkpA/spartin/par-1/mys/cup/Nrg/pum/Ythdf/Dok/pygo/Wnt5/wnd/fj/Egfr/hiw/p53/disco-r/Mtl/Tor/dbo/baz/sbb/Syp/Nf1/Cul2/beta-Spec/LanA/htl/18w/Rassf/TSG101/Rab8/ttk/repo/Sema2b/Ank2/hyd/step/fz2/Prosap/Smox/kis/PNUTS/Timp/pico/Ire1/shg/Hipk/nmo/Nos/crb/hid/ex/hep/CG42638/Trpml/alpha-Spec/trio/Frl/bi/fkh/Stat92E/Dad/ft/Hs6st/Nlg1/Tollo/dally/DAAM/poe/Rac2/dlg1/tra/CASK/rgn/jing/Akt/Tl/rut/kibra/Sema1b…
44	GO:0007560	imaginal disc morphogenesis	398	-0.37002	-1.68349	2.91851e-06	0.000183282	0.00015579	4459	tags=54%, list=38%, signal=34%	tok/dac/cic/dve/px/ara/Ilk/arr/how/RhoGAP68F/stg/fog/msk/osa/Fhos/Cyp301a1/ebi/d/tkv/fbl/Ubx/sob/Dl/l(3)psg2/Dys/vg/wg/dap/CG42674/Mbs/hop/put/Gprk2/Asx/Myo31DF/in/bs/CG43658/svr/msn/dlp/Arf6/frtz/rho/Galphas/par-1/mys/Mrtf/RhoGAP19D/cg/Nrg/RhoGAP54D/Cbl/Sp1/Dok/pygo/S6kII/fj/Ppcs/aos/unk/ss/Egfr/ap/Mkp3/fry/disco-r/Mtl/Su(H)/Pura/sbb/sd/Cul3/lgs/grk/sca/Pkn/Cks30A/Rap1/ltl/opa/zip/ptc/oc/Ced-12/…
45	GO:0048563	post-embryonic animal organ morphogenesis	398	-0.37002	-1.68349	2.91851e-06	0.000183282	0.00015579	4459	tags=54%, list=38%, signal=34%	tok/dac/cic/dve/px/ara/Ilk/arr/how/RhoGAP68F/stg/fog/msk/osa/Fhos/Cyp301a1/ebi/d/tkv/fbl/Ubx/sob/Dl/l(3)psg2/Dys/vg/wg/dap/CG42674/Mbs/hop/put/Gprk2/Asx/Myo31DF/in/bs/CG43658/svr/msn/dlp/Arf6/frtz/rho/Galphas/par-1/mys/Mrtf/RhoGAP19D/cg/Nrg/RhoGAP54D/Cbl/Sp1/Dok/pygo/S6kII/fj/Ppcs/aos/unk/ss/Egfr/ap/Mkp3/fry/disco-r/Mtl/Su(H)/Pura/sbb/sd/Cul3/lgs/grk/sca/Pkn/Cks30A/Rap1/ltl/opa/zip/ptc/oc/Ced-12/…
43	GO:0007610	behavior	483	-0.35867	-1.65737	1.66499e-06	0.000109425	9.30112e-05	3744	tags=44%, list=32%, signal=31%	Plc21C/Pde1c/gw/S6kII/Tsf1/wnd/Itpr/Orcokinin/Sirt1/inc/ss/CenG1A/geko/CCKLR-17D3/Egfr/Mef2/hiw/spoon/Atx2/Su(H)/Pura/sbb/ogre/Cul3/Nf1/Abd-B/wake/Sik3/Cirl/slgA/DAT/CG10433/jhamt/Tomosyn/Fbxl4/hang/AGO1/ash1/orb2/aPKC/Shal/oc/Tob/Akap200/Ank2/nab/Nca/kis/be/CkIIalpha/ebo/spi/Pino/CrzR/Gug/retn/Ork1/Acer/Eb1/Rbfox1/Gba1b/drl/Stat92E/pxb/ccb/Bx/dsx/Rac2/Sap47/dlg1/CASK/Ekar/HDAC4/cyc/mud/rut/Dcr-2…
42	GO:0003008	system process	470	-0.35841	-1.65496	1.32328e-06	8.90376e-05	7.56821e-05	3148	tags=43%, list=27%, signal=33%	bru1/ru/orb2/aPKC/Shal/zip/dpr17/Plp/Tob/Rfx/Ac78C/Ank2/Obp56c/kis/be/trpl/Cubn/CG4928/ebo/Nos/spi/CCAP/CG12206/wtrw/MRP/Ork1/CG30344/Acer/sei/Tmhs/Eb1/Lasp/Rbfox1/Gba1b/drl/Stat92E/pxb/Bx/salr/hbt/Amph/kirre/Sap47/ck/Nrx-IV/CarT/CASK/pnr/sws/HDAC4/cyc/Stacl/rut/if/sinu/ClC-b/CRMP/dbr/chico/cora/meng/TrpA1/vn/stops/Nrx-1/mew/Ptth/Lcch3/pain/mura/eas/Scgdelta/pHCl-1/TkR99D/dpr2/Ptp10D/Src64B/Npc1a…
41	GO:0007423	sensory organ development	473	-0.361386	-1.6685	1.22497e-06	8.44331e-05	7.17683e-05	4270	tags=52%, list=36%, signal=34%	Afti/Awh/rumi/PDZ-GEF/mts/ac/Tao/Oli/Asap/klu/Dronc/dac/cic/nuf/aux/ara/Smyd4-4/trr/arr/msk/wts/elB/ebi/klar/d/boi/tkv/Cyfip/CG4766/insc/Nup154/rau/Dl/seq/vg/wg/dap/Strica/Mbs/hop/put/dos/Asx/btl/sna/tant/dlp/Arf6/Cdc16/eyg/rho/Cam/mask/tup/Cul4/Cbl/Dab/grh/Blimp-1/S6kII/msi/didum/Skp2/fj/Ppcs/aos/unk/bnl/ss/Egfr/fry/Mtl/Atx2/AP-1gamma/Su(H)/faf/sd/Cul3/M6/dan/sca/pyd/danr/Rap1/lola/ru/ab/Ehbp1/a…
40	GO:0048707	instar larval or pupal morphogenesis	446	-0.369177	-1.70064	1.12997e-06	7.98327e-05	6.78579e-05	4459	tags=54%, list=38%, signal=35%	tok/dac/cic/dve/px/ara/Ilk/Eip74EF/arr/how/RhoGAP68F/stg/fog/msk/Dif/osa/Fhos/raptor/Cyp301a1/ebi/Ubi-p63E/d/tkv/fbl/Ubx/sob/Dl/l(3)psg2/Dys/vg/wg/dap/drosha/CG42674/Strica/Mbs/hop/put/Gprk2/Asx/Myo31DF/in/bs/CG43658/svr/msn/dlp/Arf6/frtz/rho/Galphas/par-1/mys/Mrtf/RhoGAP19D/cg/Nrg/Cam/RhoGAP54D/Atg2/Cbl/Sp1/Dok/pygo/S6kII/Trf2/IP3K2/Itpr/fj/Ppcs/Atg5/aos/unk/ss/Egfr/ap/Mkp3/fry/MED24/disco-r/Mtl…
39	GO:0007617	mating behavior	101	-0.548791	-2.11067	1.08091e-06	7.83241e-05	6.65756e-05	1556	tags=35%, list=13%, signal=30%	fru/Dh31/dati/Syn/Gr93d/btv/Dnah3/Crz/NPF/InR/5-HT1A/Adar/mil/bol/Tbh/SIFaR/ple/Gr77a/5-HT7/pros/cac/Nlg2/fipi/fne/Oamb/mbl/Esp/FoxP/mGluR/Gr39a/lobo/Sh/IBIN/para/y
38	GO:0009886	post-embryonic animal morphogenesis	461	-0.367467	-1.69581	9.05276e-07	6.7324e-05	5.72255e-05	4459	tags=53%, list=38%, signal=34%	tok/dac/cic/dve/px/ara/Ilk/Eip74EF/arr/how/RhoGAP68F/stg/fog/msk/Dif/osa/Fhos/raptor/Cyp301a1/ebi/Ubi-p63E/d/tkv/fbl/Ubx/sob/Dl/l(3)psg2/Dys/vg/wg/dap/drosha/CG42674/Strica/Mbs/hop/put/Gprk2/egl/Asx/Myo31DF/in/bs/CG43658/svr/msn/dlp/Arf6/frtz/rho/Galphas/par-1/mys/Mrtf/RhoGAP19D/cg/Nrg/Cam/RhoGAP54D/Atg2/Cbl/Sp1/Dok/pygo/S6kII/Trf2/IP3K2/Itpr/fj/Ppcs/Atg5/aos/unk/ss/Egfr/ap/Mkp3/fry/MED24/disco-r…
37	GO:0140053	mitochondrial gene expression	134	0.550324	2.19498	7.73097e-07	5.90479e-05	5.01908e-05	3706	tags=68%, list=32%, signal=47%	mRpS14/scu/CG12848/mRpL48/mRpL2/mRpS26/mRpL15/mRpL27/mRpS18C/mEFTu1/mRpL47/mldr/CG6094/mRpS22/Tcs4/mRpL42/mRpL50/mRpL36/mRpS31/mRpL1/CG17141/mRpL12/mRpL40/mRpL14/mtTFB1/mRpL19/GatC/mRpL44/mRpL39/mRpL9/mRpL22/mRpS6/mRF1/mRpL46/mRpL49/HisRS/mRpL45/mRpL52/Nfs1/mRpS28/mRpL41/Lrpprc2/mRpL11/mRpL35/mRpS35/TyrRS-m/mRpL17/mRRF1/MTPAP/CG4610/mRpL38/mRpL10/mRpL28/mRpS34/mRpL13/mRpS29/mRpS24/mRpL21/CG11679/…
36	GO:0032543	mitochondrial translation	110	0.569394	2.20978	6.79806e-07	5.33648e-05	4.53602e-05	3706	tags=71%, list=32%, signal=49%	mRpS14/CG12848/mRpL48/mRpL2/mRpS26/mRpL15/mRpL27/mRpS18C/mEFTu1/mRpL47/CG6094/mRpS22/mRpL42/mRpL50/mRpL36/mRpS31/mRpL1/CG17141/mRpL12/mRpL40/mRpL14/mRpL19/GatC/mRpL44/mRpL39/mRpL9/mRpL22/mRpS6/mRF1/mRpL46/mRpL49/HisRS/mRpL45/mRpL52/mRpS28/mRpL41/Lrpprc2/mRpL11/mRpL35/mRpS35/TyrRS-m/mRpL17/mRRF1/mRpL38/mRpL10/mRpL28/mRpS34/mRpL13/mRpS29/mRpS24/mRpL21/CG11679/mRpS25/mRpL51/mRpL53/mIF2/mRpS2/CG3862/…
35	GO:0050877	nervous system process	371	-0.392062	-1.77179	6.01096e-07	4.99314e-05	4.24418e-05	3263	tags=44%, list=28%, signal=33%	orb2/aPKC/Shal/zip/dpr17/Plp/Tob/Rfx/Ac78C/Ank2/Obp56c/kis/be/trpl/ebo/spi/CG12206/wtrw/sei/Tmhs/Eb1/Rbfox1/Gba1b/drl/Stat92E/pxb/salr/hbt/Sap47/ck/CarT/CASK/sws/HDAC4/Stacl/rut/if/ClC-b/CRMP/dbr/chico/meng/TrpA1/vn/stops/Nrx-1/mew/Lcch3/pain/mura/eas/pHCl-1/TkR99D/dpr2/Ptp10D/Src64B/Inx7/Krn/Fas2/N/Appl/scb/dikar/Nmdar1/gish/CaMKII/bsk/sgg/Pka-C1/SKIP/rg/dpr9/gl/G9a/hmw/Ptr/Gad1/dpr3/Nazo/na/dnc…
34	GO:0008038	neuron recognition	117	-0.539168	-2.1258	6.18401e-07	4.99314e-05	4.24418e-05	3395	tags=57%, list=29%, signal=41%	CG6867/Ptp99A/ImpL2/beta-Spec/Nrt/lola/ab/gek/Nedd4/zfh1/Sema2b/fz2/sli/alpha-Spec/Bsg/drl/dsx/Nrx-IV/Tl/if/robo2/Ten-m/Cont/beat-IIIc/bdl/Sulf1/uzip/RhoGAPp190/otk/mew/Mmp1/Pvf3/fra/NetB/Fas2/comm/Sema2a/Ten-a/Ptp69D/PlexA/CG5758/tutl/Fas1/Galphaq/hig/fru/Trim9/Wnt4/robo1/slow/Con/Dscam1/stan/Mmp2/robo3/nrm/Sema1a/PlexB/beat-Ia/Dscam3/CG32373/Drl-2/Dscam2/loaf/CadN/dpr12/beat-Ic
33	GO:0060179	male mating behavior	61	-0.631318	-2.2146	5.30059e-07	4.53924e-05	3.85836e-05	1556	tags=38%, list=13%, signal=33%	fru/Syn/Gr93d/btv/NPF/5-HT1A/Adar/mil/Tbh/ple/Gr77a/5-HT7/pros/cac/Nlg2/fipi/fne/Oamb/FoxP/mGluR/Gr39a/para/y
30	GO:0001654	eye development	390	-0.384726	-1.74622	4.99952e-07	4.41521e-05	3.75293e-05	4270	tags=49%, list=36%, signal=32%	klar/d/boi/tkv/Cyfip/CG4766/Nup154/rau/Dl/seq/vg/wg/Strica/Mbs/hop/put/dos/btl/sna/dlp/Arf6/Cdc16/eyg/rho/Cam/mask/Cbl/Dab/grh/Blimp-1/S6kII/msi/didum/Skp2/fj/aos/unk/bnl/ss/Egfr/fry/Mtl/Atx2/AP-1gamma/Su(H)/faf/sd/Cul3/M6/dan/sca/pyd/danr/Rap1/lola/ru/cdi/aPKC/phyl/ptc/oc/vimar/toe/ed/ttk/Rala/smo/PIG-V/Smox/noc/CkIIalpha/RasGAP1/Traf4/Nrk/Ire1/shg/Hipk/nmo/spi/crb/Apc/Nct/Gug/ex/l(2)gd1/rno/Frl…
31	GO:0048880	sensory system development	390	-0.384726	-1.74622	4.99952e-07	4.41521e-05	3.75293e-05	4270	tags=49%, list=36%, signal=32%	klar/d/boi/tkv/Cyfip/CG4766/Nup154/rau/Dl/seq/vg/wg/Strica/Mbs/hop/put/dos/btl/sna/dlp/Arf6/Cdc16/eyg/rho/Cam/mask/Cbl/Dab/grh/Blimp-1/S6kII/msi/didum/Skp2/fj/aos/unk/bnl/ss/Egfr/fry/Mtl/Atx2/AP-1gamma/Su(H)/faf/sd/Cul3/M6/dan/sca/pyd/danr/Rap1/lola/ru/cdi/aPKC/phyl/ptc/oc/vimar/toe/ed/ttk/Rala/smo/PIG-V/Smox/noc/CkIIalpha/RasGAP1/Traf4/Nrk/Ire1/shg/Hipk/nmo/spi/crb/Apc/Nct/Gug/ex/l(2)gd1/rno/Frl…
32	GO:0150063	visual system development	390	-0.384726	-1.74622	4.99952e-07	4.41521e-05	3.75293e-05	4270	tags=49%, list=36%, signal=32%	klar/d/boi/tkv/Cyfip/CG4766/Nup154/rau/Dl/seq/vg/wg/Strica/Mbs/hop/put/dos/btl/sna/dlp/Arf6/Cdc16/eyg/rho/Cam/mask/Cbl/Dab/grh/Blimp-1/S6kII/msi/didum/Skp2/fj/aos/unk/bnl/ss/Egfr/fry/Mtl/Atx2/AP-1gamma/Su(H)/faf/sd/Cul3/M6/dan/sca/pyd/danr/Rap1/lola/ru/cdi/aPKC/phyl/ptc/oc/vimar/toe/ed/ttk/Rala/smo/PIG-V/Smox/noc/CkIIalpha/RasGAP1/Traf4/Nrk/Ire1/shg/Hipk/nmo/spi/crb/Apc/Nct/Gug/ex/l(2)gd1/rno/Frl…
29	GO:0008049	male courtship behavior	54	-0.656413	-2.26416	3.8928e-07	3.79346e-05	3.22445e-05	1556	tags=43%, list=13%, signal=37%	fru/Syn/Gr93d/btv/NPF/5-HT1A/Adar/mil/Tbh/ple/Gr77a/5-HT7/pros/cac/Nlg2/fipi/fne/Oamb/FoxP/mGluR/Gr39a/para/y
28	GO:0007417	central nervous system development	272	-0.424507	-1.85204	2.57785e-07	2.60179e-05	2.21153e-05	4106	tags=56%, list=35%, signal=37%	wg/dap/drosha/ems/wit/Dhc64C/sim/asp/l(3)neo38/kune/moody/mid/sna/vap/rho/mys/MCPH1/Nrg/mask/Notum/Dab/eg/grh/RNaseZ/E2f1/Itpr/LpR2/ap/mas/Nup358/Brr2/dan/htl/18w/Nrt/danr/opa/ab/Ror/oc/Ced-12/ph-p/C1GalTA/Sema2b/smo/Smox/cib/noc/Dr/Psc/NT1/ebo/Timp/shg/D/S-Lap1/Ulp1/grim/Apc/enok/alpha-Spec/Dll/trio/Frl/toy/pasi1/drl/csw/DAAM/ccb/Hem/Nrx-IV/jing/mop/mud/sr/if/sinu/exd/robo2/vvl/cora/babo/Sema5c/…
27	GO:0099536	synaptic signaling	306	-0.4197	-1.8494	1.80449e-07	1.8887e-05	1.6054e-05	2750	tags=40%, list=23%, signal=31%	Sap47/dlg1/CG15286/CASK/Ekar/CG6329/mop/Akt/rut/Chc/Src42A/Cbp53E/5-HT2A/chico/Ten-m/CG7781/CG31835/Rab3-GAP/Exn/Sec10/Srpk79D/Nrx-1/Lcch3/cv-c/pHCl-1/PGRP-LC/rogdi/TkR99D/Src64B/Rbp/Fas2/GABA-B-R2/Syngr/svp/Nlg4/Nmdar1/sky/Rab3/lap/NFAT/Csk/CaMKII/Ten-a/Pka-C1/mAChR-A/CG11155/nSyb/Nlg3/Rph/Dg/na/dnc/GluRIIB/Galphaq/Pten/stj/Tusp/Syx4/rl/Syn/Sytalpha/kek6/Sytbeta/Alk/VGAT/rt/nAChRbeta1/NtR/5-HT1A…
26	GO:0040003	chitin-based cuticle development	125	0.561167	2.20989	1.49795e-07	1.62816e-05	1.38394e-05	1242	tags=33%, list=11%, signal=30%	Cpr76Bc/TwdlX/Cpr49Ab/Lcp65Ad/Vajk2/Cpr65Aw/Cpr65Au/Vajk3/obst-E/Vajk1/Cpr49Ah/Lcp65Ab1/Lcp9/Lcp65Ac/Pu/Cpr62Bc/Cpr66Cb/Cpr11B/Cpr67Fa2/Idgf5/Pcp/Lcp1/TwdlG/Cpr11A/Cpr100A/Lcp3/Idgf6/Cpr92F/Cpr47Ec/Cpr49Af/Lcp2/Cpr60D/Cpr78E/Lcp65Aa/Cpr78Ca/Idgf4/Cpr97Ea/obst-A/Cpr65Ec/Sec13/Hakai
25	GO:0007619	courtship behavior	64	-0.637655	-2.24923	1.49536e-07	1.62816e-05	1.38394e-05	1699	tags=42%, list=14%, signal=36%	dnc/fru/Dh31/Syn/Gr93d/btv/Crz/NPF/5-HT1A/Adar/mil/Tbh/ple/Gr77a/5-HT7/pros/cac/Nlg2/fipi/fne/Oamb/FoxP/mGluR/Gr39a/Sh/para/y
24	GO:0008037	cell recognition	122	-0.540734	-2.13964	8.16951e-08	9.61959e-06	8.17667e-06	3395	tags=57%, list=29%, signal=41%	CG6867/Ptp99A/ImpL2/beta-Spec/Nrt/Mcr/lola/ab/gek/Nedd4/zfh1/Sema2b/fz2/sli/alpha-Spec/Bsg/drl/dsx/Nrx-IV/Tl/if/robo2/Ten-m/Cont/beat-IIIc/bdl/Sulf1/uzip/RhoGAPp190/otk/mew/Mmp1/Pvf3/fra/NetB/Fas2/comm/Sema2a/Ten-a/Ptp69D/PlexA/CG5758/tutl/Fas1/Galphaq/hig/fru/Trim9/Wnt4/robo1/lectin-28C/slow/eater/Con/Dscam1/stan/Mmp2/robo3/nrm/Sema1a/PlexB/beat-Ia/Dscam3/CG32373/Drl-2/Dscam2/loaf/CadN/dpr12/bea…
23	GO:0042391	regulation of membrane potential	72	-0.621397	-2.24009	7.70342e-08	9.46516e-06	8.0454e-06	2332	tags=57%, list=20%, signal=46%	Lcch3/pHCl-1/Piezo/Task7/bves/Nmdar1/galene/Irk2/Task6/jus/Galphaq/CG1688/CG42594/nAChRbeta1/Elk/NtR/nAChRalpha4/Ca-alpha1T/Adar/CG42340/VGlut/NaCP60E/Shab/shakB/nAChRalpha3/Slob/Fife/nAChRbeta2/nAChRalpha2/cac/nAChRalpha1/Rim/Rdl/nAChRalpha6/GluClalpha/Sh/nAChRalpha5/Pzl/qvr/nAChRalpha7/para
22	GO:0007267	cell-cell signaling	475	-0.38118	-1.75809	2.58487e-08	3.32038e-06	2.82233e-06	3142	tags=39%, list=27%, signal=30%	GluRIA/Ank2/hyd/fz2/Prosap/be/NT1/CkIIalpha/Hipk/nmo/Apc/Nct/Akh/alpha-Spec/Wnk/drl/Nlg1/dally/Ser/tws/Dyb/Sap47/dlg1/Cul1/CG15286/CASK/Ekar/tsh/CG6329/nord/mop/Akt/rut/Chc/flw/Src42A/Cbp53E/5-HT2A/chico/Ten-m/skd/CG12147/crol/CG7781/CG31835/Sulf1/Rab3-GAP/Exn/Sec10/Srpk79D/otk/Nrx-1/Lcch3/cv-c/pHCl-1/PGRP-LC/rogdi/TkR99D/CG9650/ewg/Src64B/Rbp/Fas2/GABA-B-R2/N/Syngr/svp/fz3/Nlg4/Nmdar1/sfl/sky/Ra…
21	GO:0098742	cell-cell adhesion via plasma-membrane adhesion molecules	75	-0.630041	-2.28568	1.89293e-08	2.54734e-06	2.16524e-06	3391	tags=80%, list=29%, signal=57%	ImpL2/Nrt/Cad96Ca/beat-IIIa/caps/ed/CG9095/shg/Bsg/Cad74A/ft/kirre/if/Cad96Cb/ItgaPS4/Lar/Cont/beat-IIIc/bdl/CG13506/otk/mew/ds/beat-Vb/Cad86C/Fas2/scb/sdk/Cad87A/Itgbn/tutl/Fas1/fz/ItgaPS5/CG7166/hbs/CG34353/sns/Con/Dscam1/beat-IV/stan/CadN2/klg/Cals/beat-IIb/Ptp36E/beat-Ia/Dscam3/Dscam2/chp/Cad88C/CadN/beat-IIIb/beat-VII/kug/beat-IIa/beat-Ic/beat-Ib/beat-Va
20	GO:0002181	cytoplasmic translation	125	0.601769	2.36978	2.16669e-09	3.06154e-07	2.60231e-07	3088	tags=71%, list=26%, signal=53%	RpS5b/RpS10a/RpL37b/RpS19b/RpL22-like/eIF2D/RpS14a/RpL17/RpL10Ab/RpS18/RpS25/RpS19a/RpS9/RpL19/RpLP2/RpS8/RpS2/RpL34b/RpL26/RpL13A/RpS14b/RpL32/RpL18/RpL11/RpL23/RpL8/RpL39/RpS17/RpL24/DENR/eIF3a/RpS23/CG8635/RpL36A/RpL13/RpS16/RpL18A/RpS21/RpL31/RpS11/CG6195/RpS12/RpS10b/RpL37A/RpL27A/CG5515/RpL7A/RpL9/eIF3i/RpL36/RpLP0/RpS6/RpL27/RpL35/RpL7/RpS5a/RpS26/RpL6/RpS4/RpL41/MCTS1/RpS7/RpS3/Rack1/RpL3…
19	GO:0097485	neuron projection guidance	260	-0.472677	-2.05791	1.91707e-09	2.85139e-07	2.42369e-07	3937	tags=57%, list=34%, signal=38%	dom/dlp/CG15611/RhoGAP93B/mys/Acsl/Nrg/Cam/tup/Dab/Wnt5/sqz/sas/Gyc76C/ap/hiw/Tor/sbb/conv/CG6867/Ptp99A/ImpL2/beta-Spec/LanA/Nrt/beat-IIIa/lola/wgn/ab/unc-5/ptc/caps/Nedd4/zfh1/Sema2b/smo/fz2/Smox/sli/kis/trn/NT1/Nrk/D/chb/chif/retn/hep/alpha-Spec/trio/hts/Bsg/drl/Dad/dally/DAAM/dsx/Rac2/LRP1/CG42327/jing/mud/Sema1b/if/Src42A/robo2/vvl/Ten-m/Lar/babo/Sema5c/Cont/beat-IIIc/bdl/Sulf1/uzip/run/mirr…
18	GO:0007411	axon guidance	252	-0.481386	-2.08596	6.63956e-10	1.04241e-07	8.86052e-08	3399	tags=51%, list=29%, signal=37%	conv/CG6867/Ptp99A/ImpL2/beta-Spec/LanA/Nrt/beat-IIIa/lola/wgn/ab/unc-5/ptc/caps/Nedd4/zfh1/Sema2b/smo/fz2/Smox/sli/kis/trn/NT1/Nrk/D/chb/chif/retn/hep/alpha-Spec/trio/hts/Bsg/drl/Dad/dally/DAAM/dsx/Rac2/LRP1/CG42327/jing/mud/Sema1b/if/Src42A/robo2/vvl/Ten-m/Lar/babo/Sema5c/Cont/beat-IIIc/bdl/Sulf1/uzip/run/mirr/otk/mew/AP-1sigma/ttv/Ptp10D/Src64B/fra/NetB/gogo/Fas2/N/comm/scb/wb/S6k/Tace/Sema2a/…
17	GO:0007409	axonogenesis	317	-0.452752	-2.00659	4.17993e-10	6.94852e-08	5.90626e-08	3399	tags=47%, list=29%, signal=35%	conv/CG6867/Ptp99A/ImpL2/beta-Spec/LanA/Nrt/beat-IIIa/lola/wgn/ab/unc-5/ptc/caps/Nedd4/zfh1/Sema2b/Ank2/smo/fz2/Smox/sli/kis/trn/NT1/Nrk/Gclc/shg/D/nudE/Ulp1/chb/chif/retn/hep/alpha-Spec/trio/hts/Frl/Bsg/drl/Dad/dally/DAAM/dsx/Hem/Rac2/LRP1/CG42327/jing/mud/rut/Sema1b/if/Src42A/robo2/vvl/Ten-m/Lar/babo/Sema5c/Cont/beat-IIIc/bdl/Sulf1/RhoGEF2/uzip/RhoGAPp190/run/spri/mirr/otk/mew/sick/AP-1sigma/tt…
16	GO:0061564	axon development	331	-0.447975	-2.00232	3.63621e-10	6.42246e-08	5.4591e-08	3399	tags=47%, list=29%, signal=34%	conv/CG6867/Ptp99A/ImpL2/beta-Spec/LanA/Nrt/beat-IIIa/lola/wgn/ab/unc-5/ptc/caps/Nedd4/zfh1/Sema2b/Ank2/smo/fz2/Smox/sli/kis/trn/NT1/Nrk/Gclc/shg/D/nudE/Ulp1/chb/chif/retn/hep/alpha-Spec/trio/hts/Frl/Bsg/drl/Dad/dally/DAAM/dsx/Hem/Rac2/LRP1/CG42327/jing/Akt/mud/rut/Sema1b/if/Imp/Src42A/robo2/vvl/Ten-m/Lar/babo/Sema5c/Cont/beat-IIIc/bdl/Sulf1/RhoGEF2/uzip/RhoGAPp190/run/spri/mirr/otk/mew/sick/Mmp1…
15	GO:0050808	synapse organization	303	-0.462848	-2.03437	1.30283e-10	2.45454e-08	2.08636e-08	3520	tags=48%, list=30%, signal=35%	dpr18/Atx2/dbo/baz/Syp/Nf1/Cul2/beta-Spec/LanA/htl/Spn/par-6/aPKC/dpr17/caps/wrd/Rab8/Nedd4/C1GalTA/repo/Ank2/fz2/Prosap/kis/nmo/Nos/Ulp1/CG42638/Trpml/alpha-Spec/trio/hts/drl/Dad/Nlg1/Dyb/Hem/dlg1/Nrx-IV/CASK/Akt/Tl/rut/Aplip1/Imp/Src42A/Ten-m/Lar/rictor/CG13506/Ypel/Srpk79D/Nrx-1/CG42673/DIP-epsilon/Fak/Syn1/Syn2/p120ctn/dpr2/ewg/Src64B/Rbp/Fas2/comm/Appl/scb/Nlg4/Rab3/S6k/CaMKII/sgg/Ten-a/rg/b…
14	GO:0099537	trans-synaptic signaling	299	-0.46623	-2.04481	1.20065e-10	2.4236e-08	2.06006e-08	2750	tags=40%, list=23%, signal=32%	Dyb/Sap47/dlg1/CASK/Ekar/CG6329/mop/Akt/rut/Chc/Src42A/Cbp53E/5-HT2A/chico/Ten-m/CG7781/Rab3-GAP/Exn/Sec10/Srpk79D/Nrx-1/Lcch3/cv-c/pHCl-1/PGRP-LC/rogdi/TkR99D/Src64B/Rbp/Fas2/GABA-B-R2/Syngr/svp/Nlg4/Nmdar1/sky/Rab3/lap/NFAT/Csk/CaMKII/Ten-a/Pka-C1/mAChR-A/CG11155/nSyb/Nlg3/Rph/Dg/na/dnc/GluRIIB/Galphaq/Pten/stj/Syx4/rl/Syn/Sytalpha/kek6/Sytbeta/Alk/VGAT/rt/nAChRbeta1/NtR/5-HT1A/GluRIB/Sol1/nACh…
5	GO:0006412	translation	436	0.447469	2.05297	1e-10	2.17385e-08	1.84777e-08	3439	tags=54%, list=29%, signal=40%	RpS5b/tut/Rcd-1r/vas/bam/aub/RpS10a/RpL37b/mRpS14/RpS19b/bgcn/CG12848/CG15262/eIF4E6/RpL22-like/mRpL48/eIF2D/eIF3f2/RpS14a/RpL17/eEF1beta/nos/mRpL2/Marf1/l(2)efl/RpL10Ab/mRpS26/mRpL15/RpS18/mRpL27/RpS25/mRpS18C/RpS19a/mEFTu1/RpS9/CG8097/RpL19/mRpL47/RpLP2/RpS8/RpS2/Rrp40/RpL34b/RpL26/RpL13A/RpS14b/RpL32/eIF3g1/RpL18/RpL11/RpL23/CG6094/mRpS22/RpL8/RpL39/RpS17/RpL24/DENR/krimp/mRpL42/mRpL50/mRpL36/…
7	GO:0043043	peptide biosynthetic process	485	0.424236	1.98192	1e-10	2.17385e-08	1.84777e-08	2808	tags=44%, list=24%, signal=35%	PGRP-SC1a/PGRP-SC1b/RpS5b/PGRP-SC2/tut/Rcd-1r/vas/bam/aub/RpS10a/RpL37b/mRpS14/grass/RpS19b/psh/bgcn/CG12848/CG15262/eIF4E6/PGRP-SA/RpL22-like/mRpL48/eIF2D/Gclm/eIF3f2/RpS14a/RpL17/sphe/eEF1beta/nos/mRpL2/Marf1/l(2)efl/RpL10Ab/mRpS26/mRpL15/RpS18/mRpL27/RpS25/mRpS18C/RpS19a/mEFTu1/RpS9/CG8097/RpL19/mRpL47/RpLP2/RpS8/RpS2/Rrp40/RpL34b/RpL26/RpL13A/RpS14b/RpL32/eIF3g1/RpL18/CG4325/RpL11/RpL23/CG609…
13	GO:0032990	cell part morphogenesis	438	-0.424596	-1.95265	1e-10	2.17385e-08	1.84777e-08	4119	tags=52%, list=35%, signal=35%	Dscam4/pdm3/Snoo/ems/wit/Dhc64C/Lrrk/Mbs/put/sim/Pi3K92E/btl/mid/msn/dom/dlp/CG15611/rho/RhoGAP93B/mys/Acsl/Nrg/Cam/pum/tup/Ythdf/Dab/Wnt5/wnd/sqz/bnl/ss/sas/Gyc76C/ap/fry/hiw/Tor/Pura/sbb/cnc/Cul3/conv/CG6867/Ptp99A/ImpL2/beta-Spec/LanA/htl/Nrt/beat-IIIa/lola/wgn/ab/unc-5/ptc/oc/caps/Nedd4/zfh1/Rfx/Sema2b/Ank2/smo/fz2/Smox/sli/kis/trn/NT1/Nak/Nrk/Gclc/Ire1/shg/D/nudE/babos/crb/Ulp1/chb/chif/hid/…
12	GO:0048812	neuron projection morphogenesis	426	-0.429483	-1.96518	1e-10	2.17385e-08	1.84777e-08	4119	tags=53%, list=35%, signal=36%	Dscam4/pdm3/Snoo/ems/wit/Dhc64C/Lrrk/Mbs/put/sim/Pi3K92E/btl/mid/msn/dom/dlp/CG15611/rho/RhoGAP93B/mys/Acsl/Nrg/Cam/pum/tup/Ythdf/Dab/Wnt5/wnd/sqz/ss/sas/Gyc76C/ap/fry/hiw/Tor/Pura/sbb/cnc/Cul3/conv/CG6867/Ptp99A/ImpL2/beta-Spec/LanA/Nrt/beat-IIIa/lola/wgn/ab/unc-5/ptc/oc/caps/Nedd4/zfh1/Rfx/Sema2b/Ank2/smo/fz2/Smox/sli/kis/trn/NT1/Nak/Nrk/Gclc/Ire1/shg/D/nudE/babos/crb/Ulp1/chb/chif/hid/retn/hep…
11	GO:0031175	neuron projection development	464	-0.425609	-1.96543	1e-10	2.17385e-08	1.84777e-08	4073	tags=52%, list=35%, signal=35%	ems/wit/Dhc64C/Lrrk/Mbs/put/sim/Pi3K92E/btl/mid/msn/dom/dlp/CG15611/rho/RhoGAP93B/mys/Acsl/Nrg/Cam/pum/tup/Ythdf/Dab/Wnt5/wnd/sqz/ss/sas/Gyc76C/ap/CG4975/fry/hiw/mas/Tor/Pura/sbb/cnc/Cul3/M6/conv/CG6867/Ptp99A/ImpL2/beta-Spec/LanA/Nrt/beat-IIIa/lola/wgn/ab/Spn/unc-5/Ror/ptc/oc/caps/Nedd4/zfh1/ttk/Rfx/Sema2b/Ank2/smo/fz2/Smox/sli/kis/trn/NT1/Nak/Nrk/Gclc/Ire1/shg/D/nudE/babos/crb/Ulp1/chb/chif/hid…
10	GO:0120039	plasma membrane bounded cell projection morphogenesis	428	-0.429327	-1.96659	1e-10	2.17385e-08	1.84777e-08	4119	tags=53%, list=35%, signal=36%	Dscam4/pdm3/Snoo/ems/wit/Dhc64C/Lrrk/Mbs/put/sim/Pi3K92E/btl/mid/msn/dom/dlp/CG15611/rho/RhoGAP93B/mys/Acsl/Nrg/Cam/pum/tup/Ythdf/Dab/Wnt5/wnd/sqz/bnl/ss/sas/Gyc76C/ap/fry/hiw/Tor/Pura/sbb/cnc/Cul3/conv/CG6867/Ptp99A/ImpL2/beta-Spec/LanA/Nrt/beat-IIIa/lola/wgn/ab/unc-5/ptc/oc/caps/Nedd4/zfh1/Rfx/Sema2b/Ank2/smo/fz2/Smox/sli/kis/trn/NT1/Nak/Nrk/Gclc/Ire1/shg/D/nudE/babos/crb/Ulp1/chb/chif/hid/retn…
9	GO:0048667	cell morphogenesis involved in neuron differentiation	421	-0.431633	-1.97042	1e-10	2.17385e-08	1.84777e-08	4119	tags=53%, list=35%, signal=36%	Dscam4/pdm3/Snoo/ems/wit/Dhc64C/Lrrk/put/sim/Pi3K92E/btl/mid/msn/dom/dlp/CG15611/rho/RhoGAP93B/mys/Acsl/Nrg/Cam/pum/tup/Ythdf/Dab/Wnt5/wnd/sqz/ss/sas/Gyc76C/ap/fry/hiw/Tor/baz/sbb/cnc/Cul3/conv/CG6867/Ptp99A/ImpL2/beta-Spec/LanA/Nrt/beat-IIIa/lola/wgn/ab/unc-5/ptc/oc/caps/Nedd4/zfh1/Rfx/Sema2b/Ank2/smo/fz2/Smox/sli/kis/trn/NT1/Nak/Nrk/Gclc/Ire1/shg/D/nudE/babos/crb/Ulp1/chb/chif/hid/retn/hep/Hecw…
8	GO:0048858	cell projection morphogenesis	430	-0.430852	-1.97233	1e-10	2.17385e-08	1.84777e-08	4119	tags=53%, list=35%, signal=36%	Dscam4/pdm3/Snoo/ems/wit/Dhc64C/Lrrk/Mbs/put/sim/Pi3K92E/btl/mid/msn/dom/dlp/CG15611/rho/RhoGAP93B/mys/Acsl/Nrg/Cam/pum/tup/Ythdf/Dab/Wnt5/wnd/sqz/bnl/ss/sas/Gyc76C/ap/fry/hiw/Tor/Pura/sbb/cnc/Cul3/conv/CG6867/Ptp99A/ImpL2/beta-Spec/LanA/htl/Nrt/beat-IIIa/lola/wgn/ab/unc-5/ptc/oc/caps/Nedd4/zfh1/Rfx/Sema2b/Ank2/smo/fz2/Smox/sli/kis/trn/NT1/Nak/Nrk/Gclc/Ire1/shg/D/nudE/babos/crb/Ulp1/chb/chif/hid/…
6	GO:0034330	cell junction organization	371	-0.446784	-2.01908	1e-10	2.17385e-08	1.84777e-08	3520	tags=46%, list=30%, signal=33%	dpr18/Atx2/dbo/baz/Syp/M6/Nf1/Cul2/beta-Spec/LanA/htl/pyd/Mcr/Rap1/Spn/par-6/aPKC/dpr17/caps/wrd/Rab8/Nedd4/C1GalTA/repo/Ank2/fz2/Prosap/kis/Traf4/shg/nmo/Nos/crb/Ulp1/Nost/CG42638/Trpml/alpha-Spec/trio/hts/pasi1/drl/Dad/Nlg1/kirre/Dyb/Hem/Rac2/dlg1/Nrx-IV/CASK/Akt/Tl/rut/Aplip1/Imp/sinu/Src42A/cora/Ten-m/Lar/rictor/Cont/CG13506/Ypel/Srpk79D/Nrx-1/CG42673/DIP-epsilon/Fak/Syn1/Syn2/Mmp1/p120ctn/dp…
3	GO:0007268	chemical synaptic transmission	294	-0.472004	-2.07199	1e-10	2.17385e-08	1.84777e-08	2783	tags=41%, list=24%, signal=32%	Dyb/Sap47/dlg1/CASK/Ekar/CG6329/mop/Akt/rut/Chc/Src42A/Cbp53E/5-HT2A/chico/Ten-m/CG7781/Rab3-GAP/Exn/Sec10/Srpk79D/Nrx-1/Lcch3/cv-c/pHCl-1/PGRP-LC/rogdi/TkR99D/Src64B/Rbp/Fas2/GABA-B-R2/Syngr/svp/Nlg4/Nmdar1/sky/Rab3/lap/NFAT/Csk/CaMKII/Ten-a/Pka-C1/mAChR-A/CG11155/nSyb/Nlg3/Rph/Dg/na/dnc/GluRIIB/Galphaq/Pten/stj/Syx4/rl/Syn/Sytalpha/kek6/Sytbeta/Alk/VGAT/rt/nAChRbeta1/NtR/5-HT1A/GluRIB/Sol1/nACh…
4	GO:0098916	anterograde trans-synaptic signaling	294	-0.472004	-2.07199	1e-10	2.17385e-08	1.84777e-08	2783	tags=41%, list=24%, signal=32%	Dyb/Sap47/dlg1/CASK/Ekar/CG6329/mop/Akt/rut/Chc/Src42A/Cbp53E/5-HT2A/chico/Ten-m/CG7781/Rab3-GAP/Exn/Sec10/Srpk79D/Nrx-1/Lcch3/cv-c/pHCl-1/PGRP-LC/rogdi/TkR99D/Src64B/Rbp/Fas2/GABA-B-R2/Syngr/svp/Nlg4/Nmdar1/sky/Rab3/lap/NFAT/Csk/CaMKII/Ten-a/Pka-C1/mAChR-A/CG11155/nSyb/Nlg3/Rph/Dg/na/dnc/GluRIIB/Galphaq/Pten/stj/Syx4/rl/Syn/Sytalpha/kek6/Sytbeta/Alk/VGAT/rt/nAChRbeta1/NtR/5-HT1A/GluRIB/Sol1/nACh…
2	GO:0007155	cell adhesion	213	-0.516486	-2.20431	1e-10	2.17385e-08	1.84777e-08	3391	tags=57%, list=29%, signal=41%	ImpL2/LanA/18w/Nrt/CG30046/POSH/pyd/Rap1/Cad96Ca/beat-IIIa/Strump/SWIP/caps/ed/Sema2b/sli/trn/CG9095/Timp/shg/Bsg/Cad74A/LanB1/ft/Nlg1/kirre/Hem/dlg1/Nrx-IV/LanB2/CG43333/CG32087/mop/if/Cad96Cb/sinu/Src42A/robo2/ItgaPS4/cora/Ten-m/Lar/crol/Cont/beat-IIIc/bdl/CG13506/otk/mew/Mmp1/ds/p120ctn/beat-Vb/Src64B/fra/Cad86C/Fas2/N/scb/bves/sdk/Nlg4/rhea/alpha-Cat/Ten-a/Ndg/Cad87A/Gbp1/PlexA/CG5758/Nlg3/It…
1	GO:0098609	cell-cell adhesion	140	-0.58288	-2.33602	1e-10	2.17385e-08	1.84777e-08	3391	tags=66%, list=29%, signal=48%	ImpL2/Nrt/POSH/pyd/Rap1/Cad96Ca/beat-IIIa/caps/ed/sli/CG9095/Timp/shg/Bsg/Cad74A/ft/Nlg1/kirre/dlg1/CG32087/mop/if/Cad96Cb/Src42A/robo2/ItgaPS4/Ten-m/Lar/Cont/beat-IIIc/bdl/CG13506/otk/mew/ds/p120ctn/beat-Vb/Src64B/fra/Cad86C/Fas2/N/scb/bves/sdk/Nlg4/rhea/alpha-Cat/Ten-a/Cad87A/Gbp1/Nlg3/Itgbn/tutl/Fas1/fz/ItgaPS5/robo1/CG7166/Zyx/hbs/CG34353/rk/sns/Con/wech/Dscam1/aop/beat-IV/plum/stan/CadN2/klg…

## Sheet: GSEA.GO.MF
	ID	Description	setSize	enrichmentScore	NES	pvalue	p.adjust	qvalue	rank	leading_edge	core_enrichment
1	GO:0003735	structural constituent of ribosome	175	0.629182	2.58396	1e-10	1.3e-08	1.09895e-08	3029	tags=72%, list=26%, signal=54%	CG11700/RpS5b/RpS10a/CG12725/RpL37b/mRpS14/RpS19b/RpL22-like/mRpL48/RpS14a/RpL17/mRpL2/RpL10Ab/mRpS26/mRpL15/RpS18/mRpL27/RpS25/mRpS18C/RpS19a/RpS9/RpL19/mRpL47/RpLP2/RpS8/RpS2/RpL34b/RpL26/RpL13A/RpS14b/RpL32/RpL18/RpL11/RpL23/mRpS22/RpL8/RpL39/RpS17/RpL24/mRpL42/mRpL50/mRpL36/mRpS31/RpS23/CG14817/mRpL1/RpL36A/RpL13/RpS16/RpL18A/RpS21/RpL31/RpS11/mRpL12/mRpL40/mRpL14/RpS12/RpS10b/mRpL19/RpL37A/R…
2	GO:0005198	structural molecule activity	380	0.510054	2.31658	1e-10	1.3e-08	1.09895e-08	2465	tags=50%, list=21%, signal=41%	Muc4B/Cpr76Bc/TwdlX/CG11700/RpS5b/Cpr49Ab/Lcp65Ad/Vajk2/CG15754/CG32819/CG32564/CG32820/Cpr65Aw/Cpr65Au/His2A:CG33808/Vajk3/RpS10a/obst-E/Vajk1/Cpr49Ah/Lcp65Ab1/Lcp9/Lcp65Ac/Mhc/CG12725/RpL37b/Cpr62Bc/mRpS14/Cpr66Cb/Cpr11B/Cpr67Fa2/Pcp/Sgs3/Lcp1/TwdlG/RpS19b/Cpr11A/Cpr100A/Lcp3/Mlp84B/RpL22-like/Cpr92F/mRpL48/Cpr47Ec/Cpr49Af/Lcp2/His2A:CG33832/His2A:CG33835/His2A:CG33838/His2A:CG33841/His2A:CG338…
3	GO:0004888	transmembrane signaling receptor activity	196	-0.545927	-2.28017	1e-10	1.3e-08	1.09895e-08	2718	tags=56%, list=23%, signal=43%	Ekar/CG42327/Tl/mthl1/tor/CG31760/robo2/5-HT2A/Lar/babo/CG13506/CG12290/otk/Lcch3/pHCl-1/Pvr/TkR99D/Ptp10D/fra/GABA-B-R2/Dh44-R2/mthl5/N/fz3/Nmdar1/mthl10/CG15556/CG43795/Ptp69D/Proc-R/PlexA/mAChR-A/CG11155/Eph/Toll-7/GluRIIB/mthl15/smog/fz/mthl2/mtt/CG7497/MsR1/robo1/CG7166/Gr93d/mthl14/Alk/CG34353/rk/CCHa1-R/nAChRbeta1/Dscam1/Or2a/InR/NtR/stan/5-HT1A/GluRIB/nAChRalpha4/AstC-R2/klg/Ddr/Octbeta1R…
4	GO:0038023	signaling receptor activity	248	-0.511537	-2.21254	1e-10	1.3e-08	1.09895e-08	2648	tags=49%, list=23%, signal=39%	Tl/mthl1/tor/CG31760/robo2/5-HT2A/Lar/babo/CG13506/CG12290/otk/Lcch3/pHCl-1/PGRP-LC/Pvr/TkR99D/Ptp10D/ftz-f1/fra/GABA-B-R2/Dh44-R2/mthl5/N/svp/sdk/fz3/Nlg4/Nmdar1/mthl10/CG15556/CG43795/Ptp69D/Proc-R/PlexA/mAChR-A/CG11155/Nlg3/CG33203/Eph/Toll-7/GluRIIB/mthl15/smog/fz/mthl2/mtt/CG7497/MsR1/robo1/CG7166/CG34357/Gr93d/mthl14/kek6/Alk/CG34353/rk/CCHa1-R/nAChRbeta1/Dscam1/Or2a/InR/NtR/stan/5-HT1A/Glu…
5	GO:0060089	molecular transducer activity	248	-0.511537	-2.21254	1e-10	1.3e-08	1.09895e-08	2648	tags=49%, list=23%, signal=39%	Tl/mthl1/tor/CG31760/robo2/5-HT2A/Lar/babo/CG13506/CG12290/otk/Lcch3/pHCl-1/PGRP-LC/Pvr/TkR99D/Ptp10D/ftz-f1/fra/GABA-B-R2/Dh44-R2/mthl5/N/svp/sdk/fz3/Nlg4/Nmdar1/mthl10/CG15556/CG43795/Ptp69D/Proc-R/PlexA/mAChR-A/CG11155/Nlg3/CG33203/Eph/Toll-7/GluRIIB/mthl15/smog/fz/mthl2/mtt/CG7497/MsR1/robo1/CG7166/CG34357/Gr93d/mthl14/kek6/Alk/CG34353/rk/CCHa1-R/nAChRbeta1/Dscam1/Or2a/InR/NtR/stan/5-HT1A/Glu…
6	GO:0005214	structural constituent of chitin-based cuticle	68	0.703268	2.48339	1.0767e-08	9.99792e-07	8.45168e-07	1149	tags=54%, list=10%, signal=49%	Cpr76Bc/TwdlX/Cpr49Ab/Lcp65Ad/Vajk2/CG15754/CG32564/Cpr65Aw/Cpr65Au/Vajk3/obst-E/Vajk1/Cpr49Ah/Lcp65Ab1/Lcp9/Lcp65Ac/Cpr62Bc/Cpr66Cb/Cpr11B/Cpr67Fa2/Pcp/Lcp1/TwdlG/Cpr11A/Cpr100A/Lcp3/Cpr92F/Cpr47Ec/Cpr49Af/Lcp2/Cpr60D/Cpr78E/Lcp65Aa/Cpr78Ca/Cpr97Ea/obst-A/Cpr65Ec
7	GO:0042302	structural constituent of cuticle	68	0.703268	2.48339	1.0767e-08	9.99792e-07	8.45168e-07	1149	tags=54%, list=10%, signal=49%	Cpr76Bc/TwdlX/Cpr49Ab/Lcp65Ad/Vajk2/CG15754/CG32564/Cpr65Aw/Cpr65Au/Vajk3/obst-E/Vajk1/Cpr49Ah/Lcp65Ab1/Lcp9/Lcp65Ac/Cpr62Bc/Cpr66Cb/Cpr11B/Cpr67Fa2/Pcp/Lcp1/TwdlG/Cpr11A/Cpr100A/Lcp3/Cpr92F/Cpr47Ec/Cpr49Af/Lcp2/Cpr60D/Cpr78E/Lcp65Aa/Cpr78Ca/Cpr97Ea/obst-A/Cpr65Ec
8	GO:0017171	serine hydrolase activity	219	0.494151	2.0812	1.97146e-08	1.60181e-06	1.35408e-06	1080	tags=30%, list=9%, signal=27%	CG5909/CG8299/CG5246/CG3251/CG6295/CG30083/Jon25Biii/CG30025/flz/Jon66Cii/CG43742/CG16749/CG12951/CG11912/Jhedup/CG1304/CG17571/CG11841/zetaTry/CG32483/CG30414/CG30090/CG6048/CG31265/CG34290/CG11034/CG9733/CG17475/FASN2/CG4053/Jon66Ci/CG6865/Jon44E/FASN1/grass/betaTry/psh/CG14892/thetaTry/CG10232/Jon99Ciii/Jon25Bi/spirit/Jon65Ai/CG32808/Jon99Cii/CG18180/CG3795/hiro/iotaTry/alpha-Est1/CG30375/CG31…
9	GO:0022836	gated channel activity	113	-0.56001	-2.17681	3.69523e-08	2.4019e-06	2.03043e-06	2718	tags=59%, list=23%, signal=46%	Ork1/sei/CG42638/Trpml/Ekar/Ir62a/hfw/ClC-b/CngB/Trpm/TrpA1/Lcch3/pain/pHCl-1/Piezo/Task7/Nmdar1/galene/Irk2/RyR/Task6/CG42709/CG11155/Ir68a/Ca-Ma2d/Shawl/GluRIIB/stj/CG1688/CG42594/Mid1/CG5888/nAChRbeta1/Elk/ppk22/NtR/GluRIB/Ir40a/nAChRalpha4/Ca-alpha1T/CG42340/Ca-beta/NaCP60E/Ir51b/Hk/Shab/Shaw/CG42260/nAChRalpha3/nAChRbeta2/nAChRalpha2/KaiR1D/cac/nAChRalpha1/SLO2/Nmdar2/Rdl/nAChRalpha6/GluClal…
10	GO:0022839	monoatomic ion gated channel activity	113	-0.56001	-2.17681	3.69523e-08	2.4019e-06	2.03043e-06	2718	tags=59%, list=23%, signal=46%	Ork1/sei/CG42638/Trpml/Ekar/Ir62a/hfw/ClC-b/CngB/Trpm/TrpA1/Lcch3/pain/pHCl-1/Piezo/Task7/Nmdar1/galene/Irk2/RyR/Task6/CG42709/CG11155/Ir68a/Ca-Ma2d/Shawl/GluRIIB/stj/CG1688/CG42594/Mid1/CG5888/nAChRbeta1/Elk/ppk22/NtR/GluRIB/Ir40a/nAChRalpha4/Ca-alpha1T/CG42340/Ca-beta/NaCP60E/Ir51b/Hk/Shab/Shaw/CG42260/nAChRalpha3/nAChRbeta2/nAChRalpha2/KaiR1D/cac/nAChRalpha1/SLO2/Nmdar2/Rdl/nAChRalpha6/GluClal…
11	GO:0008010	structural constituent of chitin-based larval cuticle	52	0.725227	2.44008	1.71075e-07	1.0109e-05	8.54555e-06	965	tags=56%, list=8%, signal=51%	Cpr76Bc/Cpr49Ab/Lcp65Ad/CG15754/Cpr65Aw/Cpr65Au/obst-E/Cpr49Ah/Lcp65Ab1/Lcp9/Lcp65Ac/Cpr62Bc/Cpr66Cb/Cpr11B/Cpr67Fa2/Pcp/Lcp1/Cpr11A/Cpr100A/Lcp3/Cpr92F/Cpr47Ec/Cpr49Af/Lcp2/Cpr60D/Cpr78E/Lcp65Aa/Cpr78Ca/Cpr97Ea
12	GO:0008236	serine-type peptidase activity	168	0.519923	2.12591	4.26154e-07	2.30833e-05	1.95133e-05	886	tags=32%, list=8%, signal=30%	CG5909/CG8299/CG5246/CG3251/CG30083/Jon25Biii/CG30025/flz/Jon66Cii/CG43742/CG16749/CG12951/CG11912/CG1304/CG17571/CG11841/zetaTry/CG32483/CG30414/CG30090/CG6048/CG31265/CG34290/CG11034/CG9733/CG17475/CG4053/Jon66Ci/CG6865/Jon44E/grass/betaTry/psh/CG14892/thetaTry/CG10232/Jon99Ciii/Jon25Bi/spirit/Jon65Ai/CG32808/Jon99Cii/CG18180/CG3795/hiro/iotaTry/CG30375/CG31269/CG10472/CG11911/CG31821/gammaTry/…
13	GO:0004252	serine-type endopeptidase activity	152	0.524997	2.1006	1.09941e-06	5.49705e-05	4.6469e-05	1080	tags=34%, list=9%, signal=31%	CG5909/CG8299/CG5246/CG30083/Jon25Biii/CG30025/flz/Jon66Cii/CG43742/CG16749/CG12951/CG11912/CG1304/CG17571/CG11841/zetaTry/CG30414/CG30090/CG6048/CG31265/CG34290/CG9733/CG17475/CG4053/Jon66Ci/CG6865/Jon44E/grass/betaTry/psh/CG14892/thetaTry/CG10232/Jon99Ciii/Jon25Bi/spirit/Jon65Ai/CG32808/Jon99Cii/CG18180/CG3795/iotaTry/CG30375/CG31269/CG10472/CG11911/gammaTry/CG3355/Ser6/CG11670/CG3700
14	GO:0000981	DNA-binding transcription factor activity, RNA polymerase II-specific	431	-0.356479	-1.63219	6.71767e-06	0.000311892	0.000263656	3972	tags=43%, list=34%, signal=29%	Axud1/bs/mid/sna/CkIIalpha-i1/Sidpn/eyg/sima/Mrtf/cg/tup/Sp1/eg/grh/CG11247/Blimp-1/E2f1/srp/nom/CG1602/sqz/Sox21b/ss/ap/Mef2/p53/FoxK/Mnt/CrebA/Su(H)/sd/Sox100B/cnc/Abd-B/CG32767/hang/CG11902/opa/knrl/Ptx1/Hey/oc/toe/zfh1/CG15725/ttk/Rfx/repo/Irbp18/MESR3/E(spl)m3-HLH/Smox/tj/CG4374/org-1/crp/Dr/GATAd/D/CG12236/CG15478/l(2)gd1/Dll/toy/bi/GATAe/Rx/fkh/Stat92E/Camta/gce/salr/trh/dsx/h/ova/byn/Fer1…
15	GO:0030594	neurotransmitter receptor activity	45	-0.644681	-2.11895	8.50582e-06	0.000364783	0.000308367	2533	tags=67%, list=22%, signal=52%	5-HT2A/CG12290/Lcch3/pHCl-1/Nmdar1/mAChR-A/CG11155/GluRIIB/nAChRbeta1/NtR/5-HT1A/GluRIB/nAChRalpha4/Dop1R1/Dop1R2/5-HT1B/5-HT7/nAChRalpha3/DopEcR/nAChRbeta2/nAChRalpha2/KaiR1D/nAChRalpha1/Oamb/Nmdar2/Rdl/nAChRalpha6/GluClalpha/nAChRalpha5/nAChRalpha7
16	GO:0008233	peptidase activity	378	0.373858	1.69809	8.97927e-06	0.000364783	0.000308367	1929	tags=29%, list=16%, signal=25%	CG10073/CG5909/CG8299/CG5246/CG3251/CG30083/Jon25Biii/CG30025/flz/Jon66Cii/CG43742/CG16749/CG12951/CG11912/CG1304/CG17571/CG11841/CG11459/CG17633/zetaTry/CG32483/CG42335/CG30414/CG30090/CG6048/CG8560/CG31265/CG34290/CG11034/CG9733/CG17475/CG4053/Jon66Ci/CG6865/Jon44E/CG4847/grass/CG15255/betaTry/psh/CG14892/CG6763/thetaTry/CG3502/CG10232/Jon99Ciii/PGRP-SA/CG1827/Jon25Bi/Nep6/spirit/Jon65Ai/CG3280…
17	GO:0004175	endopeptidase activity	239	0.433542	1.85838	1.1746e-05	0.000449112	0.000379654	1333	tags=28%, list=11%, signal=25%	CG5909/CG8299/CG5246/CG30083/Jon25Biii/CG30025/flz/Jon66Cii/CG43742/CG16749/CG12951/CG11912/CG1304/CG17571/CG11841/CG11459/zetaTry/CG30414/CG30090/CG6048/CG31265/CG34290/CG9733/CG17475/CG4053/Jon66Ci/CG6865/Jon44E/CG4847/grass/CG15255/betaTry/psh/CG14892/CG6763/thetaTry/CG10232/Jon99Ciii/Jon25Bi/Nep6/spirit/Jon65Ai/CG32808/Jon99Cii/CG18180/CG3795/iotaTry/CG30375/CG31269/CG10472/CG11911/gammaTry/C…
18	GO:0050839	cell adhesion molecule binding	70	-0.574677	-2.0714	1.29503e-05	0.000467651	0.000395326	2904	tags=60%, list=25%, signal=45%	Bsg/cno/ft/kirre/ck/CG43333/if/ItgaPS4/Cont/bdl/otk/mew/ds/p120ctn/Fas2/scb/CG2082/sdk/rhea/alpha-Cat/CG5758/Itgbn/tutl/Dg/Fas1/ItgaPS5/hbs/sns/Dscam1/plum/Ccn/stan/CadN2/CG45263/Dscam3/Dscam2/CadN/tei/kug/Ret/Gfrl/fred
19	GO:0005216	monoatomic ion channel activity	169	-0.442166	-1.81442	2.30956e-05	0.000790112	0.000667916	2718	tags=46%, list=23%, signal=36%	Ekar/Ir62a/CG3638/hfw/ClC-b/CngB/tty/Trpm/TrpA1/Lcch3/pain/pHCl-1/Piezo/Task7/Nmdar1/galene/Irk2/RyR/Task6/CG42709/CG11155/Recs1/Ir68a/Ca-Ma2d/Shawl/na/GluRIIB/stj/CG1688/CG12061/CG42594/unc80/Mid1/CG5888/nAChRbeta1/CG1090/OtopLc/Nckx30C/Elk/ppk22/NtR/GluRIB/Ir40a/nAChRalpha4/Ca-alpha1T/knon/CG42340/Ca-beta/NaCP60E/Ir51b/Hk/Shab/Shaw/OtopLa/CG15270/CG42260/nAChRalpha3/ATPsynCF6L/nAChRbeta2/nAChRa…
20	GO:0003700	DNA-binding transcription factor activity	498	-0.332439	-1.53677	4.06546e-05	0.00132127	0.00111693	3755	tags=39%, list=32%, signal=27%	eg/grh/CG11247/Blimp-1/Trf2/E2f1/srp/nom/CG1602/sqz/Sox21b/ss/ap/slp2/Mef2/p53/FoxK/Mnt/CrebA/Su(H)/sd/Sox100B/cnc/Abd-B/dan/CG32767/danr/hang/CG11902/opa/lola/ab/knrl/Ptx1/Hey/oc/toe/zfh1/CG15725/ttk/Rfx/repo/Irbp18/MESR3/E(spl)m3-HLH/Smox/tj/CG4374/org-1/crp/Dr/GATAd/D/CG12236/CG15478/l(2)gd1/Dll/toy/bi/br/GATAe/Rx/fkh/Stat92E/Camta/gce/salr/trh/dsx/h/ova/byn/Fer1/CG10654/tsh/MESR4/pnr/Drgx/cyc…
21	GO:0098960	postsynaptic neurotransmitter receptor activity	35	-0.656987	-2.0439	4.63295e-05	0.00142317	0.00120307	1300	tags=57%, list=11%, signal=51%	mAChR-A/GluRIIB/nAChRbeta1/NtR/GluRIB/nAChRalpha4/Dop1R1/Dop1R2/nAChRalpha3/DopEcR/nAChRbeta2/nAChRalpha2/KaiR1D/nAChRalpha1/Nmdar2/Rdl/nAChRalpha6/GluClalpha/nAChRalpha5/nAChRalpha7
22	GO:0015631	tubulin binding	150	-0.451335	-1.83321	4.8169e-05	0.00142317	0.00120307	3025	tags=37%, list=26%, signal=28%	Kebab/nudE/Apc/chb/TTLL4A/TBCC/Klp31E/CG15306/alpha-Spec/Eb1/spir/kat-60L1/toc/smash/cmet/Klp59D/Jupiter/Grip75/CG2082/CLIP-190/CG16719/CG17122/msps/stai/CG7131/Grip163/Sdb/CG14535/CG12395/CG10839/CG33287/pigs/tau/CG15676/t-Grip84/pod1/CG12983/CG17816/IFT54/CG30177/Mst27D/apolpp/TTLL1B/CG10845/unc-104/kat80/CG32371/TTLL6A/CG33286/futsch/CG8800/Kif3C/t-Grip91/CG2955/CG11584/t-Grip128
23	GO:0004930	G protein-coupled receptor activity	89	-0.506526	-1.90379	7.76879e-05	0.00219553	0.00185598	2262	tags=55%, list=19%, signal=45%	mthl1/CG31760/5-HT2A/CG12290/TkR99D/GABA-B-R2/Dh44-R2/mthl5/mthl10/CG15556/CG43795/Proc-R/mAChR-A/mthl15/smog/mthl2/mtt/CG7497/MsR1/mthl14/rk/CCHa1-R/stan/5-HT1A/AstC-R2/Octbeta1R/CG13579/PK2-R1/Dop1R1/Dop1R2/sNPF-R/AdoR/GABA-B-R1/SIFaR/CG13995/GABA-B-R3/5-HT1B/CG44153/5-HT7/AstC-R1/Lgr3/DopEcR/Octalpha2R/Pdfr/Octbeta3R/Oamb/FMRFaR/mGluR/Lgr4
24	GO:0005231	excitatory extracellular ligand-gated monoatomic ion channel activity	19	-0.769323	-2.08559	8.38617e-05	0.00227125	0.00191999	1300	tags=63%, list=11%, signal=56%	nAChRbeta1/NtR/nAChRalpha4/nAChRalpha3/nAChRbeta2/nAChRalpha2/nAChRalpha1/Rdl/nAChRalpha6/GluClalpha/nAChRalpha5/nAChRalpha7
25	GO:0099529	neurotransmitter receptor activity involved in regulation of postsynaptic membrane potential	28	-0.682832	-2.0182	9.5374e-05	0.00238435	0.0020156	1300	tags=57%, list=11%, signal=51%	GluRIIB/nAChRbeta1/NtR/GluRIB/nAChRalpha4/nAChRalpha3/nAChRbeta2/nAChRalpha2/KaiR1D/nAChRalpha1/Nmdar2/Rdl/nAChRalpha6/GluClalpha/nAChRalpha5/nAChRalpha7
26	GO:1904315	transmitter-gated monoatomic ion channel activity involved in regulation of postsynaptic membrane potential	28	-0.682832	-2.0182	9.5374e-05	0.00238435	0.0020156	1300	tags=57%, list=11%, signal=51%	GluRIIB/nAChRbeta1/NtR/GluRIB/nAChRalpha4/nAChRalpha3/nAChRbeta2/nAChRalpha2/KaiR1D/nAChRalpha1/Nmdar2/Rdl/nAChRalpha6/GluClalpha/nAChRalpha5/nAChRalpha7
27	GO:0008017	microtubule binding	122	-0.452539	-1.78153	0.000115246	0.0025831	0.00218361	3096	tags=39%, list=26%, signal=29%	Klp59C/Kebab/nudE/Apc/chb/Klp31E/CG15306/alpha-Spec/Eb1/spir/kat-60L1/toc/smash/cmet/Klp59D/Jupiter/Grip75/CLIP-190/CG16719/CG17122/msps/CG7131/Grip163/Sdb/CG14535/CG12395/CG33287/pigs/tau/t-Grip84/pod1/CG12983/CG17816/IFT54/CG30177/Mst27D/apolpp/CG10845/unc-104/kat80/CG32371/CG33286/futsch/Kif3C/t-Grip91/CG2955/CG11584/t-Grip128
28	GO:0015267	channel activity	186	-0.406666	-1.69006	0.000113947	0.0025831	0.00218361	2499	tags=40%, list=21%, signal=32%	CngB/tty/Trpm/TrpA1/Lcch3/pain/pHCl-1/Piezo/Inx7/Task7/Nmdar1/galene/Irk2/RyR/Task6/CG42709/CG11155/Recs1/Ir68a/Ca-Ma2d/Shawl/na/GluRIIB/stj/CG1688/CG12061/CG42594/unc80/Mid1/CG5888/nAChRbeta1/CG1090/OtopLc/Nckx30C/Elk/ppk22/NtR/GluRIB/Ir40a/nAChRalpha4/Ca-alpha1T/knon/CG42340/Ca-beta/NaCP60E/Ir51b/Hk/Shab/shakB/Shaw/OtopLa/CG15270/CG42260/nAChRalpha3/ATPsynCF6L/nAChRbeta2/nAChRalpha2/KaiR1D/cac/…
29	GO:0022803	passive transmembrane transporter activity	186	-0.406666	-1.69006	0.000113947	0.0025831	0.00218361	2499	tags=40%, list=21%, signal=32%	CngB/tty/Trpm/TrpA1/Lcch3/pain/pHCl-1/Piezo/Inx7/Task7/Nmdar1/galene/Irk2/RyR/Task6/CG42709/CG11155/Recs1/Ir68a/Ca-Ma2d/Shawl/na/GluRIIB/stj/CG1688/CG12061/CG42594/unc80/Mid1/CG5888/nAChRbeta1/CG1090/OtopLc/Nckx30C/Elk/ppk22/NtR/GluRIB/Ir40a/nAChRalpha4/Ca-alpha1T/knon/CG42340/Ca-beta/NaCP60E/Ir51b/Hk/Shab/shakB/Shaw/OtopLa/CG15270/CG42260/nAChRalpha3/ATPsynCF6L/nAChRbeta2/nAChRalpha2/KaiR1D/cac/…
30	GO:0022848	acetylcholine-gated monoatomic cation-selective channel activity	11	-0.850739	-2.0296	0.000135214	0.00292965	0.00247656	1300	tags=91%, list=11%, signal=81%	nAChRbeta1/NtR/nAChRalpha4/nAChRalpha3/nAChRbeta2/nAChRalpha2/nAChRalpha1/nAChRalpha6/nAChRalpha5/nAChRalpha7
31	GO:0045505	dynein intermediate chain binding	30	-0.680678	-2.04149	0.000145332	0.00304727	0.002576	1525	tags=43%, list=13%, signal=38%	HEATR2/btv/robl22E/Dnah3/robl37BC/CG5048/robl62A/Dhc36C/CG31275/CG10834/kl-2/kl-5/kl-3
32	GO:0015276	ligand-gated monoatomic ion channel activity	61	-0.554095	-1.94014	0.000178016	0.00350638	0.0029641	2930	tags=62%, list=25%, signal=47%	sei/CG42638/Trpml/Ekar/Ir62a/CngB/Trpm/TrpA1/Lcch3/pHCl-1/Nmdar1/Irk2/RyR/CG11155/Ir68a/GluRIIB/nAChRbeta1/ppk22/NtR/GluRIB/Ir40a/nAChRalpha4/Ir51b/CG42260/nAChRalpha3/nAChRbeta2/nAChRalpha2/KaiR1D/nAChRalpha1/Nmdar2/Rdl/nAChRalpha6/GluClalpha/nAChRalpha5/Ir76a/Cngl/nAChRalpha7/Ir54a
33	GO:0022834	ligand-gated channel activity	61	-0.554095	-1.94014	0.000178016	0.00350638	0.0029641	2930	tags=62%, list=25%, signal=47%	sei/CG42638/Trpml/Ekar/Ir62a/CngB/Trpm/TrpA1/Lcch3/pHCl-1/Nmdar1/Irk2/RyR/CG11155/Ir68a/GluRIIB/nAChRbeta1/ppk22/NtR/GluRIB/Ir40a/nAChRalpha4/Ir51b/CG42260/nAChRalpha3/nAChRbeta2/nAChRalpha2/KaiR1D/nAChRalpha1/Nmdar2/Rdl/nAChRalpha6/GluClalpha/nAChRalpha5/Ir76a/Cngl/nAChRalpha7/Ir54a
34	GO:0022843	voltage-gated monoatomic cation channel activity	38	-0.627933	-1.98162	0.000220651	0.00421833	0.00356594	2150	tags=61%, list=18%, signal=50%	Task7/galene/Irk2/Task6/CG42709/Ca-Ma2d/Shawl/stj/CG1688/CG42594/CG5888/Elk/Ca-alpha1T/CG42340/Ca-beta/NaCP60E/Hk/Shab/Shaw/cac/SLO2/stol/Sh
35	GO:0000977	RNA polymerase II transcription regulatory region sequence-specific DNA binding	434	-0.332535	-1.52292	0.000247197	0.00459081	0.00388081	3755	tags=38%, list=32%, signal=27%	eg/grh/CG11247/Blimp-1/Trf2/E2f1/srp/nom/CG1602/sqz/Sox21b/ap/Mef2/p53/FoxK/Pbp95/Mnt/CrebA/Su(H)/sd/Sox100B/cnc/Abd-B/CG32767/CG11902/opa/knrl/Ptx1/Hey/oc/toe/zfh1/CG15725/ttk/Rfx/repo/Irbp18/MESR3/E(spl)m3-HLH/Smox/tj/CG4374/org-1/crp/Dr/GATAd/D/CG15478/l(2)gd1/Dll/toy/bi/br/GATAe/Rx/fkh/Stat92E/gce/salr/trh/dsx/h/ova/byn/Utx/Fer1/CG10654/MESR4/pnr/Drgx/cyc/E(spl)mdelta-HLH/sr/CG34376/exd/B-H2/…
36	GO:0000978	RNA polymerase II cis-regulatory region sequence-specific DNA binding	345	-0.338778	-1.51479	0.000423683	0.00764984	0.00646674	4127	tags=45%, list=35%, signal=30%	Met/pdm3/Snoo/ems/CG32772/Usf/sim/l(3)neo38/bs/mid/sna/CkIIalpha-i1/Sidpn/eyg/cg/tup/Sp1/eg/grh/CG11247/Blimp-1/E2f1/srp/nom/CG1602/sqz/Sox21b/Mef2/p53/FoxK/Pbp95/Mnt/CrebA/Su(H)/sd/Sox100B/cnc/Abd-B/CG32767/CG11902/opa/knrl/Ptx1/Hey/oc/toe/zfh1/CG15725/ttk/Rfx/Irbp18/MESR3/E(spl)m3-HLH/Smox/tj/CG4374/org-1/crp/GATAd/D/l(2)gd1/Dll/toy/bi/GATAe/fkh/Stat92E/gce/salr/dsx/h/ova/byn/Utx/MESR4/pnr/cyc/…
37	GO:0000987	cis-regulatory region sequence-specific DNA binding	353	-0.33778	-1.51652	0.000446067	0.0078363	0.00662437	4127	tags=44%, list=35%, signal=30%	Met/pdm3/Snoo/ems/CG32772/Usf/sim/l(3)neo38/bs/mid/sna/CkIIalpha-i1/Sidpn/eyg/cg/tup/Sp1/eg/grh/CG11247/Blimp-1/E2f1/srp/nom/CG1602/sqz/Sox21b/Mef2/p53/FoxK/Pbp95/Mnt/CrebA/Su(H)/sd/Sox100B/cnc/Abd-B/CG32767/CG11902/opa/knrl/Ptx1/Hey/oc/toe/zfh1/CG15725/ttk/Rfx/Irbp18/MESR3/E(spl)m3-HLH/Smox/tj/CG4374/org-1/crp/GATAd/D/l(2)gd1/Dll/toy/bi/GATAe/fkh/Stat92E/gce/salr/dsx/h/ova/byn/Utx/MESR4/pnr/cyc/…
38	GO:0005244	voltage-gated monoatomic ion channel activity	48	-0.574563	-1.92315	0.000481261	0.00802101	0.00678052	2150	tags=52%, list=18%, signal=43%	Task7/Nmdar1/galene/Irk2/Task6/CG42709/Ca-Ma2d/Shawl/stj/CG1688/CG42594/CG5888/Elk/Ca-alpha1T/CG42340/Ca-beta/NaCP60E/Hk/Shab/Shaw/cac/SLO2/Nmdar2/stol/Sh
39	GO:0022832	voltage-gated channel activity	48	-0.574563	-1.92315	0.000481261	0.00802101	0.00678052	2150	tags=52%, list=18%, signal=43%	Task7/Nmdar1/galene/Irk2/Task6/CG42709/Ca-Ma2d/Shawl/stj/CG1688/CG42594/CG5888/Elk/Ca-alpha1T/CG42340/Ca-beta/NaCP60E/Hk/Shab/Shaw/cac/SLO2/Nmdar2/stol/Sh
40	GO:0000976	transcription cis-regulatory region binding	492	-0.310199	-1.43166	0.000549719	0.00893293	0.0075514	3755	tags=37%, list=32%, signal=26%	eg/grh/CG11247/Hers/Blimp-1/Trf2/E2f1/srp/Setx/nom/CG1602/sqz/Sox21b/ss/ap/Mef2/p53/FoxK/Pbp95/Mnt/CrebA/Su(H)/sd/Sox100B/cnc/Abd-B/CG32767/CG11902/opa/knrl/Ptx1/Hey/oc/toe/zfh1/CG15725/ttk/Rfx/repo/Irbp18/MESR3/E(spl)m3-HLH/Smox/tj/CG4374/org-1/crp/Dr/GATAd/D/CG1647/CG15478/l(2)gd1/retn/Dll/htk/toy/bi/br/GATAe/Rbfox1/Rx/fkh/Stat92E/Camta/gce/salr/trh/dsx/h/ova/byn/Utx/Fer1/CG10654/MESR4/pnr/Drgx…
41	GO:0015075	monoatomic ion transmembrane transporter activity	290	-0.351128	-1.53871	0.000727135	0.0115278	0.00974492	2725	tags=35%, list=23%, signal=28%	Vha36-2/Ekar/Ir62a/CG12376/CG3638/Vha16-2/Zip102B/hfw/VhaPPA1-2/ClC-b/Vmat/CngB/tty/Trpm/TrpA1/Vha14-2/CG10413/Vha100-3/Lcch3/pain/pHCl-1/GC2/Piezo/Prestin/PMCA/Task7/Nmdar1/galene/Irk2/RyR/Task6/CG42709/CG11155/Recs1/Ir68a/Ca-Ma2d/Shawl/na/GluRIIB/stj/CG1688/CNT1/CG12061/CG42594/unc80/CG43066/VGAT/Mid1/CG5888/nAChRbeta1/CG1090/OtopLc/Nckx30C/Elk/ppk22/NtR/GluRIB/Ir40a/nAChRalpha4/Ca-alpha1T/knon…
42	GO:0005230	extracellular ligand-gated monoatomic ion channel activity	33	-0.634014	-1.9516	0.000985355	0.0142329	0.0120317	2332	tags=61%, list=20%, signal=49%	Lcch3/pHCl-1/Nmdar1/CG11155/GluRIIB/nAChRbeta1/NtR/GluRIB/nAChRalpha4/nAChRalpha3/nAChRbeta2/nAChRalpha2/KaiR1D/nAChRalpha1/Nmdar2/Rdl/nAChRalpha6/GluClalpha/nAChRalpha5/nAChRalpha7
43	GO:0022824	transmitter-gated monoatomic ion channel activity	33	-0.634014	-1.9516	0.000985355	0.0142329	0.0120317	2332	tags=61%, list=20%, signal=49%	Lcch3/pHCl-1/Nmdar1/CG11155/GluRIIB/nAChRbeta1/NtR/GluRIB/nAChRalpha4/nAChRalpha3/nAChRbeta2/nAChRalpha2/KaiR1D/nAChRalpha1/Nmdar2/Rdl/nAChRalpha6/GluClalpha/nAChRalpha5/nAChRalpha7
44	GO:0022835	transmitter-gated channel activity	33	-0.634014	-1.9516	0.000985355	0.0142329	0.0120317	2332	tags=61%, list=20%, signal=49%	Lcch3/pHCl-1/Nmdar1/CG11155/GluRIIB/nAChRbeta1/NtR/GluRIB/nAChRalpha4/nAChRalpha3/nAChRbeta2/nAChRalpha2/KaiR1D/nAChRalpha1/Nmdar2/Rdl/nAChRalpha6/GluClalpha/nAChRalpha5/nAChRalpha7
45	GO:0001067	transcription regulatory region nucleic acid binding	493	-0.309627	-1.43029	0.000934076	0.0142329	0.0120317	3755	tags=37%, list=32%, signal=26%	eg/grh/CG11247/Hers/Blimp-1/Trf2/E2f1/srp/Setx/nom/CG1602/sqz/Sox21b/ss/ap/Mef2/p53/FoxK/Pbp95/Mnt/CrebA/Su(H)/sd/Sox100B/cnc/Abd-B/CG32767/CG11902/opa/knrl/Ptx1/Hey/oc/toe/zfh1/CG15725/ttk/Rfx/repo/Irbp18/MESR3/E(spl)m3-HLH/Smox/tj/CG4374/org-1/crp/Dr/GATAd/D/CG1647/CG15478/l(2)gd1/retn/Dll/htk/toy/bi/br/GATAe/Rbfox1/Rx/fkh/Stat92E/Camta/gce/salr/trh/dsx/h/ova/byn/Utx/Fer1/CG10654/MESR4/pnr/Drgx…
46	GO:0005261	monoatomic cation channel activity	134	-0.424455	-1.70081	0.00112109	0.0158415	0.0133915	2016	tags=39%, list=17%, signal=33%	galene/Irk2/RyR/Task6/CG42709/CG11155/Recs1/Ca-Ma2d/Shawl/na/GluRIIB/stj/CG1688/CG12061/CG42594/unc80/Mid1/CG5888/nAChRbeta1/CG1090/OtopLc/Nckx30C/Elk/ppk22/NtR/nAChRalpha4/Ca-alpha1T/knon/CG42340/Ca-beta/NaCP60E/Hk/Shab/Shaw/OtopLa/CG42260/nAChRalpha3/ATPsynCF6L/nAChRbeta2/nAChRalpha2/KaiR1D/cac/nAChRalpha1/SLO2/nAChRalpha6/stol/Sh/nAChRalpha5/Pzl/Cngl/nAChRalpha7/para
47	GO:1901702	salt transmembrane transporter activity	217	-0.361682	-1.54396	0.00142346	0.0196861	0.0166415	2718	tags=37%, list=23%, signal=29%	Ekar/CG12376/CG3638/hfw/CG32832/SCaMC/ClC-b/Vmat/tty/Trpm/TrpA1/Targ/CG10413/Lcch3/pain/CG5535/CG7309/pHCl-1/GC2/Dic2/Prestin/PMCA/Task7/galene/Irk2/RyR/Task6/Dic3/CG42709/CG11155/Recs1/Indy-2/Ca-Ma2d/Shawl/GluRIIB/stj/CG1688/CNT1/CG12061/CG42594/CG43066/Mid1/CG5888/CG1090/CG9717/Nckx30C/Elk/ppk22/Ca-alpha1T/CG42340/CG45062/Ca-beta/VGlut/NaCP60E/Hk/Shab/Shaw/Indy/CG15270/ChT/CG14743/CG18418/CG108…
48	GO:0098631	cell adhesion mediator activity	17	-0.689015	-1.81357	0.00188339	0.0255043	0.0215599	3391	tags=88%, list=29%, signal=63%	ImpL2/Nrt/Bsg/Cont/bdl/otk/Fas2/sdk/tutl/Dg/hbs/sns/Dscam1/Dscam3/Dscam2
49	GO:0016616	oxidoreductase activity, acting on the CH-OH group of donors, NAD or NADP as acceptor	97	0.459152	1.73639	0.00198412	0.02632	0.0222494	1696	tags=38%, list=14%, signal=33%	Antdh/Adh/sro/CG3699/CG13833/Sodh-1/Had1/Pgd/CG10962/scu/Sodh-2/CG31548/CG7322/Dhrs4/Mdh1/CG9331/Ldh/CG3397/Fbp2/CG9436/CG31674/CG10748/sni/CG8888/CG17221/CG12171/Fdh/CG1236/Idh3a/Gmer/CG10638/ras/Zw/Mdh2/CG10425/CG3301/CG10863
50	GO:0016810	hydrolase activity, acting on carbon-nitrogen (but not peptide) bonds	86	0.494278	1.82649	0.00209849	0.0272804	0.0230613	1479	tags=26%, list=13%, signal=23%	PGRP-SC1a/PGRP-SC1b/CG32751/PGRP-SC2/Btnd/arg/Pu/CG8353/CG17065/Adgf-D/Adgf-C/CG1827/KFase/CG30016/CG17109/CG6726/Oscillin/CG17110/HINT1/CG5112/CG6106/PGRP-LB
51	GO:0019887	protein kinase regulator activity	69	0.52011	1.84071	0.00234271	0.0298581	0.0252403	23	tags=6%, list=0%, signal=6%	Ste:CG33239/Ste:CG33244/Ste:CG33245/Ste:CG33237
52	GO:0051959	dynein light intermediate chain binding	17	-0.675244	-1.77732	0.00276569	0.0332907	0.0281421	1438	tags=53%, list=12%, signal=47%	Dhc62B/sac/CG3339/btv/Dnah3/Dhc36C/kl-2/kl-5/kl-3
53	GO:0016614	oxidoreductase activity, acting on CH-OH group of donors	112	0.436448	1.68801	0.00271572	0.0332907	0.0281421	1799	tags=38%, list=15%, signal=33%	Antdh/fiz/Adh/sro/CG3699/Eo/CG13833/Sodh-1/Had1/Pgd/CG10962/CG12539/scu/Sodh-2/CG31548/CG7322/Dhrs4/Mdh1/CG9331/Ldh/CG3397/Fbp2/CG9436/CG31674/CG10748/sni/CG8888/CG17221/CG12171/Fdh/CG1236/Idh3a/Gmer/CG10638/ras/Zw/Mdh2/CG10425/CG3301/CG10863/Hao/D2hgdh/CG17121
54	GO:0004672	protein kinase activity	213	-0.352184	-1.49615	0.00268112	0.0332907	0.0281421	4081	tags=49%, list=35%, signal=33%	CG9222/wit/S6KL/Lrrk/hop/put/Gprk2/bon/Eip63E/btl/msn/CG4839/par-1/CG8565/Lk6/Pask/Cdk2/Mkk4/PhKgamma/S6kII/wnd/fj/IKKbeta/CG17528/Egfr/CG3277/Takl2/Tor/CG1227/Sik3/Pkn/htl/CG31145/Cad96Ca/cdi/aPKC/Ror/Ack-like/gek/Drak/CkIIalpha/Nak/Nrk/Ire1/Hipk/CaMKI/nmo/hep/Wnk/Cdc7/CG4945/CASK/Pka-C2/Akt/tor/Src42A/meng/CG12147/babo/Srpk79D/otk/Fak/Pvr/Dyrk3/Src64B/CG14305/fs(1)h/Doa/CG5790/gish/niki/Pkc53E/…
55	GO:0003777	microtubule motor activity	36	-0.57474	-1.79306	0.00304276	0.0359599	0.0303985	3139	tags=44%, list=27%, signal=33%	Dhc16F/Klp59C/Klp31E/Dhc62B/cmet/Klp59D/sac/CG3339/btv/Dnah3/Dhc36C/unc-104/Kif3C/kl-2/kl-5/kl-3
56	GO:0061783	peptidoglycan muralytic activity	14	0.828919	2.13542	0.00381031	0.0442268	0.0373868	1004	tags=64%, list=9%, signal=59%	PGRP-SC1a/PGRP-SC1b/LysE/PGRP-SC2/LysP/LysD/CG6426/CG16799/LysS

## Sheet: GSEA.GO.CC
	ID	Description	setSize	enrichmentScore	NES	pvalue	p.adjust	qvalue	rank	leading_edge	core_enrichment
1	GO:0005840	ribosome	189	0.651031	2.74618	1e-10	1.1775e-08	8.52632e-09	3029	tags=73%, list=26%, signal=55%	betaNACtes6/CG11700/betaNACtes2/RpS5b/betaNACtes4/RpS10a/betaNACtes1/betaNACtes3/CG12725/RpL37b/mRpS14/RpS19b/CG12848/RpL22-like/mRpL48/RpS14a/RpL17/mRpL2/RpL10Ab/mRpS26/mRpL15/RpS18/mRpL27/RpS25/mRpS18C/RpS19a/RpS9/RpL19/mRpL47/RpLP2/RpS8/RpS2/RpL34b/RpL26/RpL13A/RpS14b/RpL32/RpL18/RpL11/RpL23/CG6094/mRpS22/RpL8/RpL39/RpS17/RpL24/mRpL42/mRpL50/mRpL36/mRpS31/RpS23/CG14817/mRpL1/RpL36A/RpL13/RpS16…
2	GO:0044391	ribosomal subunit	176	0.633569	2.63758	1e-10	1.1775e-08	8.52632e-09	3423	tags=78%, list=29%, signal=56%	CG11700/RpS5b/RpS10a/CG12725/RpL37b/mRpS14/RpS19b/RpL22-like/mRpL48/RpS14a/RpL17/mRpL2/RpL10Ab/mRpS26/mRpL15/RpS18/mRpL27/RpS25/mRpS18C/RpS19a/RpS9/RpL19/mRpL47/RpLP2/RpS8/RpS2/RpL34b/RpL26/RpL13A/RpS14b/RpL32/RpL18/RpL11/RpL23/CG6094/mRpS22/RpL8/RpL39/RpS17/RpL24/mRpL42/mRpL50/mRpL36/mRpS31/RpS23/mRpL1/RpL36A/RpL13/RpS16/RpL18A/RpS21/RpL31/RpS11/mRpL12/mRpL40/mRpL14/RpS12/RpS10b/mRpL19/RpL37A/Rp…
3	GO:0043005	neuron projection	346	-0.535788	-2.40182	1e-10	1.1775e-08	8.52632e-09	3398	tags=55%, list=29%, signal=41%	DAT/Ptp99A/ImpL2/beta-Spec/Atg8a/Nrt/pyd/Fbxl4/Spn/orb2/par-6/dpr17/gek/Nedd4/Ank2/smo/Prosap/sli/trpl/Nak/Timp/nudE/crb/Apc/chb/hep/Eb1/trio/Bsg/drl/Ser/DAAM/dlg1/CarT/LRP1/CASK/Aplip1/Imp/robo2/Cbp53E/5-HT2A/Vmat/Lar/Cont/bdl/CG13506/Rab3-GAP/Srpk79D/orb/otk/Nrx-1/DIP-epsilon/Ptth/Fak/Lcch3/Mmp1/pHCl-1/CG42450/dpr2/Ptp10D/fra/NetB/gogo/Fas2/Appl/CLIP-190/Nmdar1/sky/amon/CaMKII/bsk/sgg/Pka-C1/Pt…
4	GO:0030424	axon	203	-0.524293	-2.21271	1e-10	1.1775e-08	8.52632e-09	3394	tags=53%, list=29%, signal=38%	Ptp99A/ImpL2/beta-Spec/Atg8a/Nrt/pyd/orb2/par-6/gek/Nedd4/Ank2/smo/Prosap/sli/Nak/nudE/Apc/chb/hep/Eb1/trio/Bsg/drl/Ser/DAAM/dlg1/CarT/CASK/Aplip1/Imp/robo2/Cbp53E/Vmat/Lar/Cont/bdl/CG13506/Rab3-GAP/Srpk79D/otk/Nrx-1/Ptth/Fak/Ptp10D/fra/NetB/gogo/Fas2/Appl/CLIP-190/sky/CaMKII/bsk/sgg/Ptp69D/Cdk5alpha/metro/drpr/nSyb/tutl/Shawl/na/hdc/Lrp4/Trim9/Syn/robo1/CG7166/Grip/Gr93d/unc80/kek6/Alk/ena/CG343…
5	GO:0022626	cytosolic ribosome	98	0.671375	2.58102	2.39343e-10	2.25461e-08	1.63257e-08	3076	tags=84%, list=26%, signal=62%	CG11700/RpS5b/RpS10a/CG12725/RpL37b/RpS19b/RpL22-like/RpS14a/RpL17/RpL10Ab/RpS18/RpS25/RpS19a/RpS9/RpL19/RpLP2/RpS8/RpS2/RpL34b/RpL26/RpL13A/RpS14b/RpL32/RpL18/RpL11/RpL23/RpL8/RpL39/RpS17/RpL24/RpS23/RpL36A/RpL13/RpS16/RpL18A/RpS21/RpL31/RpS11/RpS12/RpS10b/RpL37A/RpL27A/RpL7A/RpL9/RpL36/eIF2A/RpLP0/RpS6/RpL27/RpL35/RpL7/RpS5a/RpS26/RpL6/RpS4/RpL41/RpS7/RpS3/Rack1/RpL30/hoip/RpL34a/RpS13/RpL14/Rp…
6	GO:0015934	large ribosomal subunit	106	0.62775	2.43898	5.09494e-09	3.8385e-07	2.77947e-07	3524	tags=83%, list=30%, signal=59%	RpL37b/RpL22-like/mRpL48/RpL17/mRpL2/RpL10Ab/mRpL15/mRpL27/RpL19/mRpL47/RpLP2/RpL34b/RpL26/RpL13A/RpL32/RpL18/RpL11/RpL23/CG6094/RpL8/RpL39/RpL24/mRpL42/mRpL50/mRpL36/mRpL1/RpL36A/RpL13/RpL18A/RpL31/mRpL12/mRpL40/mRpL14/mRpL19/RpL37A/RpL27A/RpL7A/RpL9/RpL36/mRpL44/mRpL39/RpLP0/RpL27/RpL35/mRpL9/mRpL22/RpL7/mRpL46/mRpL49/RpL6/mRpL45/RpL41/mRpL52/mRpL41/mRpL11/mRpL35/RpL30/hoip/RpL34a/mRpL17/RpL14/…
7	GO:0030054	cell junction	461	-0.393219	-1.80062	5.70478e-09	3.8385e-07	2.77947e-07	3468	tags=42%, list=30%, signal=31%	ogre/VhaAC45RP/Cul3/Syp/M6/Rab14/DAT/beta-Spec/Atg8a/LanA/htl/Tomosyn/pyd/Mcr/Spn/orb2/par-6/aPKC/zip/Rab8/Nedd4/ed/Tob/GluRIA/Ank2/step/Prosap/shg/crb/ex/alpha-Spec/hts/Bsg/Lasp/cno/Egfrap/LanB1/Nlg1/DAAM/Amph/kirre/Dyb/Hem/Sap47/dlg1/Nrx-IV/CarT/CASK/Ekar/RabX4/smash/mop/mud/kibra/Rab39/if/Swip-1/sinu/kon/Cbp53E/Vmat/cora/Ten-m/Lar/Cont/yrt/Rab3-GAP/Exn/Srpk79D/orb/Nrx-1/mew/CG42673/Fak/Lcch3/b…
8	GO:0098590	plasma membrane region	290	-0.443435	-1.94824	1.6879e-08	9.9375e-07	7.19577e-07	3398	tags=47%, list=29%, signal=34%	DAT/LanA/Nrt/pyd/Mcr/CG6688/orb2/par-6/aPKC/zip/ptc/dpr17/Tob/GluRIA/ZnT33D/Ank2/Lrch/step/Prosap/sced/trpl/Cen/crb/AP-2alpha/ex/l(2)gd1/alpha-Spec/Oatp30B/Stat92E/Cad74A/ft/Nlg1/dally/Ser/Amph/kirre/Graf/dlg1/Ekar/Tl/kibra/Chc/if/Ten-m/Lar/yrt/Rab3-GAP/Exn/RhoGEF2/cta/Nrx-1/mew/cv-c/PGRP-LC/ds/dpr2/promL/Pde6/Fas2/N/scb/Nlg4/Nmdar1/lap/CaMKII/Ten-a/dpr9/CG11155/Nlg3/dpr3/Arl4/PIP5K59B/Dg/Shawl/S…
9	GO:0045202	synapse	319	-0.413172	-1.84186	8.06665e-08	4.22155e-06	3.05684e-06	2920	tags=38%, list=25%, signal=29%	alpha-Spec/hts/Bsg/Nlg1/DAAM/Amph/Dyb/Hem/Sap47/dlg1/Nrx-IV/CarT/CASK/Ekar/RabX4/mop/Rab39/Cbp53E/Vmat/Ten-m/Rab3-GAP/Exn/Srpk79D/orb/Nrx-1/CG42673/Fak/Lcch3/pHCl-1/PGRP-LC/Rbp/Fas2/Syngr/Rab26/Nlg4/Nmdar1/sky/Rab3/lap/S6k/CaMKII/sgg/Ten-a/stai/metro/mAChR-A/drpr/CG11155/nSyb/Nlg3/Rph/Dg/Shawl/na/GluRIIB/Rab9Fa/stj/Syx4/Lrp4/l(2)gl/rl/Syn/Grip/kek6/Sytbeta/Alk/ena/VGAT/Lapsyn/IA-2/nAChRbeta1/Con/…
10	GO:0032589	neuron projection membrane	32	-0.762376	-2.32147	1.36542e-07	6.43111e-06	4.65679e-06	1882	tags=75%, list=16%, signal=63%	dpr9/dpr3/Shawl/dpr19/Or2a/DIP-gamma/Shaw/dpr14/dpr6/dpr4/dpr13/dpr7/dpr5/dpr12/DIP-alpha/Rdl/dpr20/dpr21/DIP-kappa/dpr10/dpr11/DIP-lambda/dpr8/Or45b
11	GO:0062129	chitin-based extracellular matrix	72	0.662266	2.39204	2.19466e-07	9.39713e-06	6.8045e-06	1149	tags=50%, list=10%, signal=45%	Cpr76Bc/Cpr49Ab/Lcp65Ad/Vajk2/CG15754/CG32564/Cpr65Aw/Cpr65Au/Vajk3/obst-E/Vajk1/Cpr49Ah/Lcp65Ab1/Lcp9/Lcp65Ac/Cpr62Bc/Cpr66Cb/Cpr11B/Cpr67Fa2/Pcp/Lcp1/Cpr11A/Cpr100A/Lcp3/Cpr92F/Cpr47Ec/Cpr49Af/Lcp2/Cpr60D/Cpr78E/Lcp65Aa/Cpr78Ca/Cpr97Ea/obst-B/obst-A/Cpr65Ec
12	GO:0098797	plasma membrane protein complex	161	-0.493992	-2.02873	3.10266e-07	1.2178e-05	8.8181e-06	3255	tags=50%, list=28%, signal=37%	par-6/aPKC/Shal/GluRIA/fz2/trpl/Traf4/shg/crb/Apc/Nct/AP-2alpha/sei/Dyb/pen-2/hfw/Chc/if/ItgaPS4/babo/cta/mew/Syn1/Syn2/Scgdelta/Cad86C/GABA-B-R2/scb/alpha-Cat/Nmdar1/CG11147/Scgalpha/CG42709/Itgbn/Ca-Ma2d/Dg/Mdr65/Shawl/GluRIIB/Galphaq/ItgaPS5/stj/Zyx/Ggamma30A/Galphao/CG5888/Dpp10/InR/Elk/GluRIB/CadN2/nAChRalpha4/Ca-alpha1T/ninaC/Ca-beta/NaCP60E/CG5250/Hk/Shab/Shaw/GABA-B-R1/CG43324/GABA-B-R3/n…
13	GO:0031256	leading edge membrane	36	-0.737994	-2.31127	4.17802e-07	1.51373e-05	1.0961e-05	2251	tags=75%, list=19%, signal=61%	dpr2/Fas2/dpr9/dpr3/Shawl/l(2)gl/dpr19/Or2a/DIP-gamma/Shaw/dpr14/dpr6/dpr4/dpr13/dpr7/dpr5/dpr12/DIP-alpha/Rdl/dpr20/dpr21/DIP-kappa/dpr10/dpr11/DIP-lambda/dpr8/Or45b
14	GO:0031252	cell leading edge	68	-0.62075	-2.1803	4.93169e-07	1.65916e-05	1.2014e-05	2251	tags=44%, list=19%, signal=36%	dpr2/Fas2/rhea/dpr9/dpr3/Shawl/l(2)gl/dpr19/mbc/ena/Or2a/DIP-gamma/Shaw/dpr14/dpr6/dpr4/dpr13/dpr7/dpr5/dpr12/DIP-alpha/Rdl/dpr20/dpr21/DIP-kappa/dpr10/dpr11/DIP-lambda/dpr8/Or45b
15	GO:0036477	somatodendritic compartment	167	-0.472642	-1.9371	1.56875e-06	4.92589e-05	3.56685e-05	3123	tags=47%, list=27%, signal=35%	Spn/orb2/Rab8/smo/Prosap/trpl/Nak/Timp/nudE/br/drl/LRP1/RabX4/Akt/Rab39/Imp/Cbp53E/5-HT2A/Ten-m/CG13506/Mmp1/fra/NetB/Appl/CaMKII/bsk/Ten-a/Pka-C1/sn/rg/Cdk5alpha/brat/mAChR-A/Shawl/na/hdc/mtt/hig/robo1/CG7166/Gr93d/ena/VGAT/CG34353/Lapsyn/Dscam1/Or2a/plum/tau/5-HT1A/Mmp2/bol/klg/sNPF/Dop1R1/Shaw/X11Lbeta/5-HT1B/ple/Gr77a/5-HT7/PlexB/ATP8B/path/Pdfr/rad/unc-104/CadN/Rab3-GEF/Oamb/Ret/futsch/Rdl/G…
16	GO:0015935	small ribosomal subunit	73	0.642387	2.33607	2.83618e-06	8.34902e-05	6.04555e-05	3395	tags=75%, list=29%, signal=54%	CG11700/RpS5b/RpS10a/CG12725/mRpS14/RpS19b/RpS14a/mRpS26/RpS18/RpS25/mRpS18C/RpS19a/RpS9/RpS8/RpS2/RpS14b/mRpS22/RpS17/mRpL42/mRpS31/RpS23/RpS16/RpS21/RpS11/RpS12/RpS10b/eIF2A/RpS6/RpS5a/mRpS6/RpS26/RpS4/RpS7/mRpS28/RpS3/mRpS35/RpS13/RpS15/RpS15Aa/mRpS34/mRpS29/mRpS24/mRpS25/RpS28b/sta/mRpS2/RpL40/RpS15Ab/bonsai/RpS30/RpS24/mRpS9/mRpS17/tko/mRpS23
17	GO:0097060	synaptic membrane	77	-0.579296	-2.11542	3.20632e-06	8.8834e-05	6.4325e-05	3148	tags=68%, list=27%, signal=50%	VhaAC45RP/DAT/LanA/orb2/Tob/GluRIA/Ank2/Prosap/Nlg1/dlg1/Ekar/Ten-m/Rab3-GAP/Exn/Nrx-1/Fas2/Nlg4/Nmdar1/lap/CaMKII/Ten-a/CG11155/Nlg3/Shawl/GluRIIB/Syx4/Lrp4/l(2)gl/Lapsyn/nAChRbeta1/GluRIB/Sol1/nAChRalpha4/Syt4/Cals/Shaw/brp/Drep2/nAChRalpha3/Fife/nAChRbeta2/nAChRalpha2/KaiR1D/Nlg2/nAChRalpha1/Nmdar2/RhoGAP100F/Rim/nAChRalpha6/unc-13/nAChRalpha5/nAChRalpha7
18	GO:0005930	axoneme	46	-0.639143	-2.10733	7.24751e-06	0.000189643	0.000137321	2421	tags=50%, list=21%, signal=40%	CG3339/CG10859/CG16719/CG4714/CG7131/Sdb/CG4712/CG13436/CG12395/CG34107/btv/Dnali1/Rsph9/IFT54/Dhc36C/CG13693/dj/CG8800/CG34124/dtr/kl-2/kl-5/kl-3
19	GO:0000313	organellar ribosome	80	0.605627	2.22646	1.27882e-05	0.000242238	0.000175405	3684	tags=76%, list=31%, signal=53%	mRpS14/CG12848/mRpL48/mRpL2/mRpS26/mRpL15/mRpL27/mRpS18C/mRpL47/CG6094/mRpS22/mRpL42/mRpL50/mRpL36/mRpS31/CG14817/mRpL1/mRpL12/mRpL40/mRpL14/mRpL19/mRpL44/mRpL39/mRpL9/mRpL22/mRpS6/mRpL46/mRpL49/mRpL45/mRpL52/mRpS28/mRpL41/mRpL11/mRpL35/mRpS35/mRpL17/mRpL38/mRpL10/mRpL28/mRpS34/mRpL13/mRpS29/mRpS24/mRpL21/mRpS25/mRpL51/mRpL53/mRpS2/bonsai/mRpL24/mRpS9/mRpL3/mRpS17/tko/mRpS23/mRpL54/mRpL43/mRpL16/…
20	GO:0005761	mitochondrial ribosome	80	0.605627	2.22646	1.27882e-05	0.000242238	0.000175405	3684	tags=76%, list=31%, signal=53%	mRpS14/CG12848/mRpL48/mRpL2/mRpS26/mRpL15/mRpL27/mRpS18C/mRpL47/CG6094/mRpS22/mRpL42/mRpL50/mRpL36/mRpS31/CG14817/mRpL1/mRpL12/mRpL40/mRpL14/mRpL19/mRpL44/mRpL39/mRpL9/mRpL22/mRpS6/mRpL46/mRpL49/mRpL45/mRpL52/mRpS28/mRpL41/mRpL11/mRpL35/mRpS35/mRpL17/mRpL38/mRpL10/mRpL28/mRpS34/mRpL13/mRpS29/mRpS24/mRpL21/mRpS25/mRpL51/mRpL53/mRpS2/bonsai/mRpL24/mRpS9/mRpL3/mRpS17/tko/mRpS23/mRpL54/mRpL43/mRpL16/…
21	GO:0031253	cell projection membrane	45	-0.659734	-2.16541	1.00731e-05	0.000242238	0.000175405	1882	tags=58%, list=16%, signal=49%	dpr9/dpr3/PIP5K59B/Shawl/dpr19/Or2a/DIP-gamma/ninaC/Shaw/dpr14/dpr6/dpr4/dpr13/dpr7/dpr5/dpr12/DIP-alpha/Rdl/dpr20/dpr21/DIP-kappa/dpr10/dpr11/DIP-lambda/dpr8/Or45b
22	GO:0031012	extracellular matrix	169	0.485318	2.01146	1.03797e-05	0.000242238	0.000175405	1017	tags=28%, list=9%, signal=26%	Muc4B/Cpr76Bc/TwdlX/Sgs5bis/Cpr49Ab/Lcp65Ad/Vajk2/CG15754/CG32564/Cpr65Aw/Cpr65Au/Vajk3/Sgs8/obst-E/Vajk1/Cpr49Ah/Lcp65Ab1/Lcp9/Lcp65Ac/CG9297/Cpr62Bc/Cpr66Cb/Cpr11B/Cpr67Fa2/Pcp/Sgs3/Lcp1/Sgs4/TwdlG/Sgs7/Cpr11A/frac/Cpr100A/Lcp3/Cpr92F/Cpr47Ec/Cpr49Af/Lcp2/Cpr60D/Tig/Cpr78E/Lcp65Aa/Sgs5/Cpr78Ca/Cpr97Ea/obst-B/Muc55B
23	GO:0030425	dendrite	92	-0.527924	-1.98716	1.23658e-05	0.000242238	0.000175405	1985	tags=41%, list=17%, signal=35%	CaMKII/bsk/Pka-C1/Cdk5alpha/mAChR-A/Shawl/hdc/mtt/robo1/Gr93d/ena/VGAT/Dscam1/Or2a/plum/tau/5-HT1A/Mmp2/Dop1R1/Shaw/X11Lbeta/5-HT1B/Gr77a/5-HT7/PlexB/ATP8B/path/unc-104/CadN/Oamb/Ret/futsch/Rdl/Gr39a/armi/Ir76a/nAChRalpha7/Or45b
24	GO:0097447	dendritic tree	92	-0.527924	-1.98716	1.23658e-05	0.000242238	0.000175405	1985	tags=41%, list=17%, signal=35%	CaMKII/bsk/Pka-C1/Cdk5alpha/mAChR-A/Shawl/hdc/mtt/robo1/Gr93d/ena/VGAT/Dscam1/Or2a/plum/tau/5-HT1A/Mmp2/Dop1R1/Shaw/X11Lbeta/5-HT1B/Gr77a/5-HT7/PlexB/ATP8B/path/unc-104/CadN/Oamb/Ret/futsch/Rdl/Gr39a/armi/Ir76a/nAChRalpha7/Or45b
25	GO:0030312	external encapsulating structure	175	0.466085	1.93905	1.28576e-05	0.000242238	0.000175405	1017	tags=27%, list=9%, signal=25%	Muc4B/Cpr76Bc/TwdlX/Sgs5bis/Cpr49Ab/Lcp65Ad/Vajk2/CG15754/CG32564/Cpr65Aw/Cpr65Au/Vajk3/Sgs8/obst-E/Vajk1/Cpr49Ah/Lcp65Ab1/Lcp9/Lcp65Ac/CG9297/Cpr62Bc/Cpr66Cb/Cpr11B/Cpr67Fa2/Pcp/Sgs3/Lcp1/Sgs4/TwdlG/Sgs7/Cpr11A/frac/Cpr100A/Lcp3/Cpr92F/Cpr47Ec/Cpr49Af/Lcp2/Cpr60D/Tig/Cpr78E/Lcp65Aa/Sgs5/Cpr78Ca/Cpr97Ea/obst-B/Muc55B
26	GO:0098798	mitochondrial protein-containing complex	257	0.41705	1.82217	1.45142e-05	0.00026293	0.000190389	2560	tags=49%, list=22%, signal=39%	ATPsynepsilonL/ATPsynbetaL/mRpS14/scu/ND-B12/CG5662/COX5A/ND-B18/COX4/ATPsynF/mRpL48/cype/ND-30/ATPsynG/ATPsynO/UQCR-14/CG7630/Cyt-c1L/ATPsynD/SdhC/ND-PDSW/ATPsynB/UQCR-C2/ND-20L/ND-B14/mRpL2/Neb-cGP/Pdhb/levy/mRpS26/ND-B14.5B/mRpL15/ATPsyngamma/COX7C/mRpL27/mRpS18C/ND-18/mRpL47/ND-ASHI/ND-B14.7/CG15459/ND-B17/ND-MNLL/mldr/COX6B/COX5B/UQCR-6.4/CG6094/mRpS22/Spg7/CG9034/COX7A/CG44242/ND-39/RFeSP/m…
27	GO:0034702	monoatomic ion channel complex	69	-0.569683	-2.01496	1.82336e-05	0.000318076	0.00023032	3142	tags=64%, list=27%, signal=47%	GluRIA/trpl/wtrw/Ork1/sei/CG42638/Trpml/hfw/CngB/Trpm/TrpA1/pain/Nmdar1/CG42709/Ca-Ma2d/Shawl/GluRIIB/stj/unc80/CG5888/Dpp10/Elk/GluRIB/nAChRalpha4/Ca-alpha1T/Ca-beta/NaCP60E/Hk/Shab/Shaw/CG42260/nAChRalpha3/nAChRalpha2/cac/nAChRalpha1/Nmdar2/CG4704/nAChRalpha6/stol/CG43321/Sh/nAChRalpha5/Cngl/para
28	GO:0022627	cytosolic small ribosomal subunit	42	0.707095	2.28419	2.35855e-05	0.000388814	0.000281541	3076	tags=86%, list=26%, signal=63%	CG11700/RpS5b/RpS10a/CG12725/RpS19b/RpS14a/RpS18/RpS25/RpS19a/RpS9/RpS8/RpS2/RpS14b/RpS17/RpS23/RpS16/RpS21/RpS11/RpS12/RpS10b/eIF2A/RpS6/RpS5a/RpS26/RpS4/RpS7/RpS3/RpS13/RpS15/RpS15Aa/RpS28b/sta/RpL40/RpS15Ab/RpS30/RpS24
29	GO:0045211	postsynaptic membrane	50	-0.611719	-2.05645	2.39397e-05	0.000388814	0.000281541	2186	tags=62%, list=19%, signal=51%	Nlg1/dlg1/Ekar/Ten-m/Fas2/Nlg4/Nmdar1/CaMKII/CG11155/Nlg3/Shawl/GluRIIB/Syx4/nAChRbeta1/GluRIB/nAChRalpha4/Syt4/Cals/Shaw/Drep2/nAChRalpha3/nAChRbeta2/nAChRalpha2/KaiR1D/Nlg2/nAChRalpha1/Nmdar2/nAChRalpha6/unc-13/nAChRalpha5/nAChRalpha7
30	GO:0000428	DNA-directed RNA polymerase complex	88	0.548284	2.05949	3.77338e-05	0.00059242	0.000428973	3522	tags=57%, list=30%, signal=40%	Taf12L/CG6220/CG9899/nht/CG12674/sa/CG10887/Polr2C/Polr1E/CycH/Prim2/Taf9/TfIIEalpha/Tfb4/CG3909/Xpd/TfIIA-S/PolA2/Polr2E/Atu/can/Taf11/Mat1/Tfb1/Taf10/Tfb5/Polr2I/Polr3F/TfIIFalpha/Polr2M/mrn/Taf10b/Taf12/Polr2H/Polr1C/Polr2F/atms/tplus3b/Taf6/hyx/Polr1D/Polr3E/PolrMT/TfIIA-L/Trf/Polr3D/TfIIFbeta/Ssl1/Polr1H/Polr3B
31	GO:0005730	nucleolus	236	0.415413	1.80198	4.18667e-05	0.000636104	0.000460605	3516	tags=44%, list=30%, signal=32%	SA-2/dany/CG10993/nht/tbrd-3/sa/CG12493/Fib/CG9123/CG6999/HP6/Polr1E/CG32706/l(1)G0004/RpS18/RpS9/RpS2/Rbm13/RpL32/Fkbp39/RpL11/CG32409/RpL8/CG40813/Noa36/CG9107/CG41562/CG5641/dbe/RpS11/HP4/tbrd-1/l(2)09851/Sas10/RpL36/mbm/Polr2E/CG7137/CG6712/RpS5a/CG2260/can/CG8939/CG3527/Non3/CG7483/RpL41/Non2/Nlp/tbrd-2/Aatf/CG7006/Rpp14a/hoip/CG4038/RpS13/RpS15/CG9004/Upf3/ais/CG15432/CG8064/eIF6/U3-55K/MED…
32	GO:0022625	cytosolic large ribosomal subunit	56	0.641402	2.20949	4.67923e-05	0.000667854	0.000483595	2959	tags=82%, list=25%, signal=62%	RpL37b/RpL22-like/RpL17/RpL10Ab/RpL19/RpLP2/RpL34b/RpL26/RpL13A/RpL32/RpL18/RpL11/RpL23/RpL8/RpL39/RpL24/RpL36A/RpL13/RpL18A/RpL31/RpL37A/RpL27A/RpL7A/RpL9/RpL36/RpLP0/RpL27/RpL35/RpL7/RpL6/RpL41/RpL30/hoip/RpL34a/RpL14/RpL23A/RpLP1/RpL4/RpL35A/RpL10/RpL15/RpL22/RpL12/RpL3/RpL29/RpL40
33	GO:0097014	ciliary plasm	48	-0.610743	-2.02588	4.56532e-05	0.000667854	0.000483595	2421	tags=48%, list=21%, signal=38%	CG3339/CG10859/CG16719/CG4714/CG7131/Sdb/CG4712/CG13436/CG12395/CG34107/btv/Dnali1/Rsph9/IFT54/Dhc36C/CG13693/dj/CG8800/CG34124/dtr/kl-2/kl-5/kl-3
34	GO:0030880	RNA polymerase complex	89	0.547249	2.05869	5.14604e-05	0.000712878	0.000516197	3522	tags=56%, list=30%, signal=40%	Taf12L/CG6220/CG9899/nht/CG12674/sa/CG10887/Polr2C/Polr1E/CycH/Prim2/Taf9/TfIIEalpha/Tfb4/CG3909/Xpd/TfIIA-S/PolA2/Polr2E/Atu/can/Taf11/Mat1/Tfb1/Taf10/Tfb5/Polr2I/Polr3F/TfIIFalpha/Polr2M/mrn/Taf10b/Taf12/Polr2H/Polr1C/Polr2F/atms/tplus3b/Taf6/hyx/Polr1D/Polr3E/PolrMT/TfIIA-L/Trf/Polr3D/TfIIFbeta/Ssl1/Polr1H/Polr3B
35	GO:0055029	nuclear DNA-directed RNA polymerase complex	87	0.546946	2.04587	5.48639e-05	0.000738312	0.000534614	3522	tags=56%, list=30%, signal=40%	Taf12L/CG6220/CG9899/nht/CG12674/sa/CG10887/Polr2C/Polr1E/CycH/Prim2/Taf9/TfIIEalpha/Tfb4/CG3909/Xpd/TfIIA-S/PolA2/Polr2E/Atu/can/Taf11/Mat1/Tfb1/Taf10/Tfb5/Polr2I/Polr3F/TfIIFalpha/Polr2M/mrn/Taf10b/Taf12/Polr2H/Polr1C/Polr2F/atms/tplus3b/Taf6/hyx/Polr1D/Polr3E/TfIIA-L/Trf/Polr3D/TfIIFbeta/Ssl1/Polr1H/Polr3B
36	GO:0043235	receptor complex	68	-0.558275	-1.96086	5.71087e-05	0.000747172	0.000541029	3369	tags=66%, list=29%, signal=47%	htl/Cad96Ca/Ror/GluRIA/Cubn/Traf4/Nrk/drl/gce/LRP1/cyc/if/tor/ItgaPS4/babo/mew/Lcch3/Pvr/GABA-B-R2/scb/Nmdar1/PlexA/Itgbn/Eph/GluRIIB/ItgaPS5/Alk/InR/GluRIB/nAChRalpha4/Ddr/GABA-B-R1/GABA-B-R3/PlexB/nAChRalpha3/nAChRalpha2/Drl-2/nAChRalpha1/Nmdar2/Ret/Gfrl/nAChRalpha6/mGluR/nAChRalpha5/Ir76a
37	GO:0048786	presynaptic active zone	29	-0.705902	-2.11705	6.66133e-05	0.000847969	0.000614017	2904	tags=72%, list=25%, signal=55%	Bsg/DAAM/Nrx-IV/Srpk79D/Rbp/Fas2/Rab3/S6k/CaMKII/Ten-a/nSyb/stj/brp/stnB/Fife/KaiR1D/cac/cpx/RhoGAP100F/Rim/unc-13
38	GO:0150034	distal axon	107	-0.493453	-1.90098	7.3396e-05	0.000909725	0.000658735	3263	tags=52%, list=28%, signal=38%	spartin/par-1/cup/pum/Itpr/Vps35/Pldn/Atg8a/orb2/par-6/gek/Nedd4/Ank2/Prosap/chb/Eb1/trio/DAAM/dlg1/CarT/CASK/Cbp53E/Vmat/Srpk79D/Nrx-1/Fak/fra/NetB/gogo/Fas2/CLIP-190/sky/Cdk5alpha/metro/nSyb/Shawl/na/Lrp4/Trim9/Syn/robo1/Grip/kek6/Alk/ena/Con/jeb/pod1/Shaw/brp/unc-104/cpx/Rab3-GEF/VAChT/Snap25/unc-13
39	GO:0009986	cell surface	77	-0.534579	-1.95213	7.56885e-05	0.000914085	0.000661892	3165	tags=58%, list=27%, signal=43%	ed/knk/sli/Mco1/Nlg1/dally/Ser/Tl/if/Dtg/ItgaPS4/Lar/mew/fra/tfc/N/scb/Nlg4/Ptp69D/Nlg3/Itgbn/CG43797/Toll-7/CAH2/ItgaPS5/lectin-24Db/Wnt4/slow/eater/Con/Mmp2/jeb/Cals/Alp8/wry/Nlg2/eys/CG15818/Alp7/Ret/Gfrl/CG7763/qvr/Alp9/Alp10
40	GO:0034703	cation channel complex	52	-0.585633	-1.97702	0.000100434	0.00118261	0.000856335	3083	tags=63%, list=26%, signal=47%	trpl/wtrw/Ork1/sei/CG42638/Trpml/hfw/CngB/Trpm/TrpA1/pain/CG42709/Ca-Ma2d/Shawl/stj/unc80/CG5888/Dpp10/Elk/Ca-alpha1T/Ca-beta/NaCP60E/Hk/Shab/Shaw/CG42260/cac/CG4704/stol/CG43321/Sh/Cngl/para
41	GO:0000315	organellar large ribosomal subunit	50	0.64544	2.15908	0.00010976	0.00123088	0.000891282	3848	tags=86%, list=33%, signal=58%	mRpL48/mRpL2/mRpL15/mRpL27/mRpL47/CG6094/mRpL42/mRpL50/mRpL36/mRpL1/mRpL12/mRpL40/mRpL14/mRpL19/mRpL44/mRpL39/mRpL9/mRpL22/mRpL46/mRpL49/mRpL45/mRpL52/mRpL41/mRpL11/mRpL35/mRpL17/mRpL38/mRpL10/mRpL28/mRpL13/mRpL21/mRpL51/mRpL53/mRpL24/mRpL3/mRpL54/mRpL43/mRpL16/mRpL34/mRpL30/mRpL18/mRpL4/mRpL23
42	GO:0005762	mitochondrial large ribosomal subunit	50	0.64544	2.15908	0.00010976	0.00123088	0.000891282	3848	tags=86%, list=33%, signal=58%	mRpL48/mRpL2/mRpL15/mRpL27/mRpL47/CG6094/mRpL42/mRpL50/mRpL36/mRpL1/mRpL12/mRpL40/mRpL14/mRpL19/mRpL44/mRpL39/mRpL9/mRpL22/mRpL46/mRpL49/mRpL45/mRpL52/mRpL41/mRpL11/mRpL35/mRpL17/mRpL38/mRpL10/mRpL28/mRpL13/mRpL21/mRpL51/mRpL53/mRpL24/mRpL3/mRpL54/mRpL43/mRpL16/mRpL34/mRpL30/mRpL18/mRpL4/mRpL23
43	GO:0099568	cytoplasmic region	144	-0.425277	-1.71129	0.000237511	0.00260157	0.00188381	3469	tags=42%, list=30%, signal=30%	CG10510/Syp/Pkn/mmm/Spn/par-6/CG4970/aPKC/zip/Fim/step/Traf4/chb/Bsg/Egfrap/Ser/Dhc62B/dlg1/ck/Dic61B/mud/kibra/RhoGEF2/CG3339/sano/Crag/CG10859/Rbp/CG16719/conu/CG4714/Ten-a/brat/CG7131/Sdb/CG4712/CG13436/CG12395/CG34107/btv/Dnali1/meru/Rsph9/IFT54/brp/stnB/Dhc36C/pros/Fife/CG13693/dj/RhoGAP100F/Rim/CG8800/CG34124/unc-13/dtr/kl-2/kl-5/kl-3
44	GO:0032838	plasma membrane bounded cell projection cytoplasm	67	-0.522708	-1.83327	0.000290914	0.0031141	0.00225493	2421	tags=34%, list=21%, signal=27%	CG3339/CG10859/CG16719/CG4714/CG7131/Sdb/CG4712/CG13436/CG12395/CG34107/btv/Dnali1/Rsph9/IFT54/Dhc36C/CG13693/dj/CG8800/CG34124/dtr/kl-2/kl-5/kl-3
45	GO:0031514	motile cilium	45	-0.602983	-1.97914	0.000322168	0.00331667	0.00240161	1941	tags=47%, list=17%, signal=39%	Mst87F/CG7131/CG14339/Sdb/Mst98Ca/djl/btv/Dnah3/CG6614/Mst77F/CG13855/Dhc36C/CG34457/dj/CG5614/gdrd/lobo/kl-2/kl-5/kl-3/Sdic2
46	GO:0098794	postsynapse	83	-0.485465	-1.77922	0.000323921	0.00331667	0.00240161	3457	tags=54%, list=29%, signal=39%	Cul3/Syp/htl/Spn/orb2/par-6/GluRIA/Prosap/hts/Nlg1/DAAM/dlg1/Ekar/Ten-m/Fas2/Nlg4/Nmdar1/sky/CaMKII/drpr/CG11155/Nlg3/Shawl/GluRIIB/Syx4/Alk/nAChRbeta1/GluRIB/nAChRalpha4/Syt4/Cals/Shaw/X11Lbeta/Drep2/nAChRalpha3/nAChRbeta2/nAChRalpha2/KaiR1D/Nlg2/nAChRalpha1/Nmdar2/nAChRalpha6/unc-13/nAChRalpha5/nAChRalpha7
47	GO:0005759	mitochondrial matrix	154	0.432082	1.77606	0.000349758	0.00350502	0.002538	3708	tags=58%, list=32%, signal=40%	mRpS14/CG12848/Sardh/mRpL48/mRpL2/Etfb/Pdhb/mRpS26/Sod2/mRpL15/mtSSB/mRpL27/mRpS18C/mRpL47/CG6094/mRpS22/Hsp60A/CG44242/mRpL42/Grx5/mRpL50/mRpL36/mRpS31/CG14817/mRpL1/mRpL12/mRpL40/mRpL14/mtTFB1/mRpL19/PolG2/mRpL44/mRpL39/mRpL9/mRpL22/CG7430/mRpS6/Sirt4/mRpL46/mRpL49/mRpL45/mRpL52/mRpS28/mRpL41/mRpL11/mRpL35/mRpS35/kdn/mRpL17/PolG1/mRpL38/MetRS-m/mRpL10/mRpL28/mRpS34/mRpL13/mRpS29/mRpS24/Idh3b/CG…
48	GO:0044306	neuron projection terminus	81	-0.497643	-1.82868	0.000358667	0.00351942	0.00254843	3889	tags=52%, list=33%, signal=35%	spartin/par-1/cup/pum/Vps35/Pldn/Atg8a/orb2/par-6/Nedd4/Ank2/Prosap/dlg1/CarT/CASK/Cbp53E/Vmat/Srpk79D/Nrx-1/Fak/Fas2/sky/metro/nSyb/Shawl/na/Lrp4/Syn/Grip/kek6/Alk/ena/VGAT/jeb/Shaw/brp/unc-104/cpx/Rab3-GEF/VAChT/Snap25/unc-13
49	GO:0098793	presynapse	177	-0.399585	-1.65847	0.000419498	0.00403232	0.00291981	2909	tags=37%, list=25%, signal=28%	hts/Bsg/DAAM/dlg1/Nrx-IV/CarT/CASK/Cbp53E/Vmat/Rab3-GAP/Exn/Srpk79D/Nrx-1/Fak/PGRP-LC/Rbp/Fas2/Syngr/sky/Rab3/lap/S6k/CaMKII/Ten-a/metro/nSyb/Rph/Shawl/na/Rab9Fa/stj/Syx4/Lrp4/l(2)gl/Syn/Grip/kek6/Sytbeta/Alk/ena/VGAT/Lapsyn/Sol1/jeb/Syt4/Frq2/VGlut/CanB/Shaw/Dop1R2/brp/Cadps/stnA/stnB/Fife/KaiR1D/unc-104/cac/cpx/Rab3-GEF/VAChT/RhoGAP100F/Rim/Snap25/unc-13/Syt7
50	GO:0061695	transferase complex, transferring phosphorus-containing groups	168	0.432138	1.79603	0.000429573	0.00404658	0.00293014	2983	tags=31%, list=25%, signal=23%	Ste:CG33239/Ste:CG33244/Ste:CG33245/Ste:CG33237/Taf12L/CG6220/CG9899/nht/CG12674/sa/CG10887/Polr2C/Polr1E/Ssl/CycH/Prim2/Taf9/TfIIEalpha/Tfb4/CG3909/PolG2/Xpd/Cdk9/PolD2/TfIIA-S/PolA2/Polr2E/Atu/can/Taf11/Mat1/Tfb1/Taf10/Tfb5/Polr2I/Polr3F/PolG1/PolD3/TfIIFalpha/Polr2M/mrn/Taf10b/Taf12/Polr2H/Polr1C/Polr2F/atms/PolZ1/Chrac-14/tplus3b/Taf6/Atg6
51	GO:0042788	polysomal ribosome	11	0.845086	2.0259	0.000447682	0.00410103	0.00296957	236	tags=45%, list=2%, signal=45%	betaNACtes6/betaNACtes2/betaNACtes4/betaNACtes1/betaNACtes3
52	GO:0005875	microtubule associated complex	98	-0.452339	-1.71496	0.000452767	0.00410103	0.00296957	1438	tags=20%, list=12%, signal=18%	btv/robl22E/Dnah3/robl37BC/Dnali1/robl62A/Dhc36C/CG10845/unc-104/kat80/futsch/CG8800/Kif3C/CG31275/CG10834/kl-2/kl-5/SdicB/kl-3/Sdic2
53	GO:0043679	axon terminus	80	-0.493409	-1.81272	0.000508189	0.00451617	0.00327018	3889	tags=51%, list=33%, signal=35%	spartin/par-1/cup/pum/Vps35/Pldn/Atg8a/orb2/par-6/Nedd4/Ank2/Prosap/dlg1/CarT/CASK/Cbp53E/Vmat/Srpk79D/Nrx-1/Fak/Fas2/sky/metro/nSyb/Shawl/na/Lrp4/Syn/Grip/kek6/Alk/ena/jeb/Shaw/brp/unc-104/cpx/Rab3-GEF/VAChT/Snap25/unc-13
54	GO:1902554	serine/threonine protein kinase complex	56	0.584545	2.01363	0.000563951	0.00491891	0.0035618	23	tags=7%, list=0%, signal=7%	Ste:CG33239/Ste:CG33244/Ste:CG33245/Ste:CG33237
55	GO:1902911	protein kinase complex	63	0.556805	1.95033	0.000768734	0.0064656	0.00468176	23	tags=6%, list=0%, signal=6%	Ste:CG33239/Ste:CG33244/Ste:CG33245/Ste:CG33237
56	GO:0030286	dynein complex	49	-0.559062	-1.86713	0.000768555	0.0064656	0.00468176	1438	tags=31%, list=12%, signal=27%	btv/robl22E/Dnah3/robl37BC/Dnali1/robl62A/Dhc36C/CG8800/CG31275/CG10834/kl-2/kl-5/SdicB/kl-3/Sdic2
57	GO:0005681	spliceosomal complex	188	0.406116	1.7141	0.000848534	0.00701157	0.0050771	4329	tags=57%, list=37%, signal=37%	aub/CG3294/LS2/LSm7/BCAS2/SmB/CG10418/CG17266/Prp38/mdlc/SmE/icln/Prp16/Mfap1/CG5641/SNRPG/Cypl/CG8435/Cbp20/Phf5a/LSm3/U2A/tbrd-1/SmD3/CG15084/Dim1/CG3225/CG4291/CG6066/Prp18/SmF/x16/tsu/CG7483/CG6179/CG11586/Srrm1/Spx/CG17764/c12.1/Srp54/CG11964/hoip/Bx42/CG2021/Prp31/snf/CG9667/Prp19/SmD2/CG7974/CG1622/U2af38/Mtr4/noi/CG17187/nonA/CG7564/CG5986/CG14641/Ref1/PQBP1/REG/CG4119/Prp5/CG11777/B52/CG…
58	GO:0005704	polytene chromosome band	23	0.713264	2.02811	0.000891828	0.00724226	0.00524414	692	tags=43%, list=6%, signal=41%	His2A:CG33808/His2A:CG33832/His2A:CG33835/His2A:CG33838/His2A:CG33841/His2A:CG33844/His2A:CG33847/His2A:CG33850/His2A:CG33862/His2A:CG33865
59	GO:0016591	RNA polymerase II, holoenzyme	66	0.555668	1.96616	0.000937359	0.00748299	0.00541845	3488	tags=59%, list=30%, signal=42%	Taf12L/CG6220/CG9899/nht/CG12674/sa/CG10887/Polr2C/CycH/Taf9/TfIIEalpha/Tfb4/CG3909/Xpd/TfIIA-S/Polr2E/Atu/can/Taf11/Mat1/Tfb1/Taf10/Tfb5/Polr2I/TfIIFalpha/Polr2M/mrn/Taf10b/Taf12/Polr2H/Polr2F/atms/tplus3b/Taf6/hyx/TfIIA-L/Trf/TfIIFbeta/Ssl1
60	GO:0044297	cell body	116	-0.432126	-1.69668	0.00101217	0.00794552	0.00575338	3427	tags=41%, list=29%, signal=30%	Rab14/DAT/Fbxl4/orb2/Rab8/Tob/smo/Nak/br/RabX4/Akt/Rab39/Imp/Ten-m/CG13506/fra/NetB/Appl/snz/Ten-a/Pka-C1/sn/rg/Cdk5alpha/brat/Shawl/na/hig/robo1/CG7166/Gr93d/CG34353/Lapsyn/Dscam1/bol/klg/sNPF/Shaw/ple/Gr77a/path/Pdfr/rad/Rab3-GEF/futsch/Rdl/Gr39a/armi
61	GO:0043025	neuronal cell body	107	-0.445019	-1.71439	0.00126664	0.0097801	0.0070818	2704	tags=36%, list=23%, signal=28%	RabX4/Akt/Rab39/Imp/Ten-m/CG13506/fra/NetB/Appl/Ten-a/Pka-C1/sn/rg/Cdk5alpha/brat/Shawl/na/hig/robo1/CG7166/Gr93d/CG34353/Lapsyn/Dscam1/bol/klg/sNPF/Shaw/ple/Gr77a/path/Pdfr/rad/Rab3-GEF/futsch/Rdl/Gr39a/armi
62	GO:0098802	plasma membrane signaling receptor complex	35	-0.595139	-1.84556	0.0013256	0.0100703	0.00729193	2605	tags=63%, list=22%, signal=49%	if/ItgaPS4/babo/mew/GABA-B-R2/scb/Nmdar1/Itgbn/GluRIIB/ItgaPS5/InR/GluRIB/nAChRalpha4/GABA-B-R1/GABA-B-R3/nAChRalpha3/nAChRalpha2/nAChRalpha1/Nmdar2/nAChRalpha6/mGluR/nAChRalpha5
63	GO:0005929	cilium	153	-0.393231	-1.59521	0.00134824	0.0100797	0.00729874	2026	tags=29%, list=17%, signal=24%	niki/CG4714/cnn/Mst87F/CG17122/CG7131/CG14339/Sdb/CG4712/CG13436/Mst98Ca/djl/CG12395/CG34107/btv/Dnah3/CG6614/Dnali1/Mst77F/CG14186/CG13855/Rsph9/IFT54/TTLL1B/ATP8B/Dhc36C/CG13693/CG34457/eys/dj/CG5614/TTLL6A/Ppr-Y/CG8800/CG34124/dysc/Kif3C/gdrd/dtr/lobo/kl-2/kl-5/kl-3/Sdic2
64	GO:1990204	oxidoreductase complex	87	0.466977	1.74674	0.00198037	0.0145743	0.0105533	2463	tags=56%, list=21%, signal=45%	ND-B12/ND-B18/ND-30/UQCR-14/Cyt-c1L/SdhC/ND-PDSW/UQCR-C2/ND-20L/ND-B14/CIA30/Pdhb/ND-B14.5B/ND-18/ND-ASHI/ND-B14.7/ND-B17/ND-MNLL/UQCR-6.4/CG9034/CG44242/ND-39/RFeSP/ND-20/ND-75/SdhD/ppl/UQCR-Q/ND-ACP/CG11752/NP15.6/Cyt-c1/CG5214/ND-42/ND-15/ND-13A/ND-B15/ND-B14.5A/ND-19/ND-B17.2/CG7430/SdhB/Gpdh1/ND-51/Marc/ND-24/ox/ND-MWFE/ND-13B
65	GO:0005615	extracellular space	434	0.308379	1.43167	0.00225239	0.0163211	0.0118182	1472	tags=20%, list=13%, signal=18%	BaraA1/ssp7/Amyrel/LysE/CG8586/Lsp1alpha/Obp56e/CG15534/CG6295/CG30083/Nplp2/CG11131/Amy-p/CG11854/Amy-d/LysP/PPO2/IM33/Ilp2/CG8738/CG17191/CG34227/CG6283/CG11459/CG17633/CG30414/PGRP-SD/CG8560/tctn/CG6628/CG9733/CG8093/CG6865/CG9673/CG4847/CG11852/LysD/CG14892/Lsp1beta/Spn55B/CG2444/Adgf-D/Jon99Ciii/CG33127/CG8072/Ilp5/Adgf-C/Peritrophin-A/Fst/Idgf6/CG10116/CG31266/Cys/CG3117/CG6675/CG14258/CG36…
66	GO:0042734	presynaptic membrane	32	-0.581805	-1.77162	0.00294077	0.0209437	0.0151654	3466	tags=66%, list=30%, signal=46%	VhaAC45RP/DAT/LanA/Ank2/dlg1/Rab3-GAP/Exn/Nrx-1/Fas2/lap/Ten-a/Shawl/l(2)gl/Lapsyn/Sol1/Shaw/brp/Fife/KaiR1D/Rim/unc-13
67	GO:0097729	9+2 motile cilium	33	-0.57346	-1.75446	0.00297925	0.0209437	0.0151654	1941	tags=42%, list=17%, signal=36%	Mst87F/CG7131/Sdb/Mst98Ca/djl/btv/Dnah3/Mst77F/Dhc36C/gdrd/kl-2/kl-5/kl-3/Sdic2
68	GO:0034704	calcium channel complex	16	-0.700949	-1.84694	0.00345498	0.0239308	0.0173284	1758	tags=56%, list=15%, signal=48%	pain/Ca-Ma2d/stj/Ca-alpha1T/Ca-beta/cac/CG4704/stol/CG43321
69	GO:0036126	sperm flagellum	30	-0.580264	-1.7471	0.00402853	0.0274991	0.0199122	1941	tags=43%, list=17%, signal=36%	Mst87F/CG7131/Sdb/Mst98Ca/djl/Dnah3/Mst77F/Dhc36C/gdrd/kl-2/kl-5/kl-3/Sdic2
70	GO:1990234	transferase complex	500	0.297655	1.40356	0.00416459	0.0280218	0.0202906	2755	tags=23%, list=23%, signal=19%	Ste:CG33239/Ste:CG33244/Ste:CG33245/Ste:CG33237/SkpE/Taf12L/CG13085/CG6220/CG1894/SkpC/CG9899/nht/CG34194/CG12674/CG3347/CG42299/sa/qjt/CG10516/CG42300/CG10887/Polr2C/MrgBP/Polr1E/Ssl/Sbat/CG17440/adp/Tps1/CG2652/Dhdds/CycH/Prim2/Taf9/Tango14/Ada2a/TfIIEalpha/icln/CG44242/Hakai/wuho/Brd8/CG43064/Act87E/NC2beta/Tfb4/CG3515/Cdc23/RabGGTb/SkpD/HemK2/CG3909/Dpy-30L1/CG5214/PolG2/vls/Ing3/vnc/Xpd/Cdk9…
71	GO:0098552	side of membrane	91	-0.433424	-1.62684	0.00424717	0.0281749	0.0204015	3127	tags=46%, list=27%, signal=34%	knk/Clbn/ex/l(2)gd1/Mco1/trio/cno/Stat92E/dally/kmr/Stacl/Tl/kibra/Rgk2/if/Src42A/ItgaPS4/cta/mew/Src64B/tfc/scb/CG30273/gish/CG43797/Toll-7/CAH2/Galphaq/ItgaPS5/lectin-24Db/Ggamma30A/mbc/Galphao/Mmp2/sty/CG43324/CG4250/CG15818/CG17760/Gfrl/CG7763/qvr
72	GO:0005844	polysome	26	0.642858	1.89439	0.00459943	0.0300879	0.0217868	1999	tags=46%, list=17%, signal=38%	betaNACtes6/betaNACtes2/betaNACtes4/betaNACtes1/betaNACtes3/RpS23/mgr/CG5515/RpS26/PCID2/eIF3h/bic
73	GO:0005746	mitochondrial respirasome	81	0.477482	1.76166	0.00473417	0.0305451	0.0221178	1762	tags=56%, list=15%, signal=48%	ND-B12/COX5A/ND-B18/COX4/cype/ND-30/UQCR-14/CG7630/Cyt-c1L/SdhC/ND-PDSW/UQCR-C2/ND-20L/ND-B14/levy/ND-B14.5B/COX7C/ND-18/ND-ASHI/ND-B14.7/ND-B17/ND-MNLL/COX6B/COX5B/UQCR-6.4/CG9034/COX7A/ND-39/RFeSP/ND-20/ND-75/SdhD/UQCR-Q/ND-ACP/CG11752/NP15.6/Cyt-c1/ND-42/ND-15/ND-13A/ND-B15/ND-B14.5A/COX8/ND-19/ND-B17.2
74	GO:0070469	respirasome	82	0.471491	1.74743	0.00523774	0.0325812	0.0235921	1762	tags=55%, list=15%, signal=47%	ND-B12/COX5A/ND-B18/COX4/cype/ND-30/UQCR-14/CG7630/Cyt-c1L/SdhC/ND-PDSW/UQCR-C2/ND-20L/ND-B14/levy/ND-B14.5B/COX7C/ND-18/ND-ASHI/ND-B14.7/ND-B17/ND-MNLL/COX6B/COX5B/UQCR-6.4/CG9034/COX7A/ND-39/RFeSP/ND-20/ND-75/SdhD/UQCR-Q/ND-ACP/CG11752/NP15.6/Cyt-c1/ND-42/ND-15/ND-13A/ND-B15/ND-B14.5A/COX8/ND-19/ND-B17.2
75	GO:0098803	respiratory chain complex	82	0.471491	1.74743	0.00523774	0.0325812	0.0235921	1762	tags=55%, list=15%, signal=47%	ND-B12/COX5A/ND-B18/COX4/cype/ND-30/UQCR-14/CG7630/Cyt-c1L/SdhC/ND-PDSW/UQCR-C2/ND-20L/ND-B14/levy/ND-B14.5B/COX7C/ND-18/ND-ASHI/ND-B14.7/ND-B17/ND-MNLL/COX6B/COX5B/UQCR-6.4/CG9034/COX7A/ND-39/RFeSP/ND-20/ND-75/SdhD/UQCR-Q/ND-ACP/CG11752/NP15.6/Cyt-c1/ND-42/ND-15/ND-13A/ND-B15/ND-B14.5A/COX8/ND-19/ND-B17.2
76	GO:0043195	terminal bouton	69	-0.455589	-1.61141	0.00525726	0.0325812	0.0235921	3889	tags=49%, list=33%, signal=33%	wg/Lrrk/spartin/par-1/cup/pum/Vps35/Pldn/Atg8a/par-6/Nedd4/Ank2/Prosap/dlg1/CASK/Cbp53E/Vmat/Nrx-1/Fak/Fas2/sky/metro/nSyb/Syn/Grip/kek6/Alk/ena/jeb/cpx/Rab3-GEF/VAChT/Snap25/unc-13
77	GO:0071011	precatalytic spliceosome	142	0.391674	1.58977	0.0058766	0.0359465	0.026029	4329	tags=56%, list=37%, signal=36%	aub/LSm7/BCAS2/SmB/CG10418/CG17266/Prp38/SmE/Mfap1/CG5641/SNRPG/Cypl/Cbp20/Phf5a/LSm3/U2A/tbrd-1/SmD3/Dim1/CG3225/CG4291/SmF/x16/CG7483/Srrm1/Spx/CG17764/c12.1/Srp54/hoip/Bx42/CG2021/Prp31/snf/CG9667/Prp19/SmD2/CG1622/U2af38/noi/CG17187/nonA/CG7564/CG14641/Ref1/PQBP1/REG/CG4119/B52/U4-U6-60K/Tango4/cyp33/Neos/Sf3a1/Sf3a2/CG2931/l(2)37Cb/snRNP-U1-70K/Usp39/Cdc2rk/kin17/CG4849/Pep/lark/Sf3b2/beag/U…
78	GO:0097525	spliceosomal snRNP complex	50	0.54195	1.81289	0.00633604	0.03826	0.0277042	3527	tags=60%, list=30%, signal=42%	LSm7/SmB/CG10418/SmE/SNRPG/Phf5a/LSm3/U2A/SmD3/Dim1/Prp18/SmF/CG12320/CG11586/Spx/hoip/CG2021/Prp31/snf/SmD2/noi/CG7564/snRNP-U1-C/CG17768/U4-U6-60K/CG6610/Sf3a1/Sf3a2/CG9344/snRNP-U1-70K
79	GO:0097526	spliceosomal tri-snRNP complex	23	0.630074	1.79156	0.00724084	0.0419605	0.0303837	3135	tags=74%, list=27%, signal=54%	LSm7/SmB/CG10418/SmE/SNRPG/LSm3/SmD3/Dim1/Prp18/CG11586/hoip/CG2021/Prp31/SmD2/CG17768/U4-U6-60K/CG6610
80	GO:0098831	presynaptic active zone cytoplasmic component	10	-0.76404	-1.78725	0.00727091	0.0419605	0.0303837	2210	tags=90%, list=19%, signal=73%	Bsg/Rbp/Ten-a/brp/stnB/Fife/RhoGAP100F/Rim/unc-13
81	GO:0005753	mitochondrial proton-transporting ATP synthase complex	22	0.62179	1.75483	0.00746172	0.0419605	0.0303837	2299	tags=73%, list=20%, signal=59%	ATPsynepsilonL/ATPsynbetaL/ATPsynF/ATPsynG/ATPsynO/ATPsynD/ATPsynB/Neb-cGP/ATPsyngamma/CG15459/ATPsynE/ATPsynCF6/ATPsyndelta/blw/ATPsynbeta/sun
82	GO:0045259	proton-transporting ATP synthase complex	22	0.62179	1.75483	0.00746172	0.0419605	0.0303837	2299	tags=73%, list=20%, signal=59%	ATPsynepsilonL/ATPsynbetaL/ATPsynF/ATPsynG/ATPsynO/ATPsynD/ATPsynB/Neb-cGP/ATPsyngamma/CG15459/ATPsynE/ATPsynCF6/ATPsyndelta/blw/ATPsynbeta/sun
83	GO:0030532	small nuclear ribonucleoprotein complex	59	0.497051	1.72429	0.00704836	0.0419605	0.0303837	4168	tags=64%, list=35%, signal=42%	LSm7/SmB/CG10418/SmE/SNRPG/Phf5a/LSm3/U2A/SmD3/Dim1/CG4291/Prp18/SmF/CG12320/CG11586/Spx/CG17764/hoip/CG2021/Prp31/snf/SmD2/noi/CG7564/snRNP-U1-C/CG17768/U4-U6-60K/CG6610/Sf3a1/Sf3a2/CG9344/snRNP-U1-70K/wcd/CG4849/Sf3b2/Larp7/Prp39/barc
84	GO:0070161	anchoring junction	156	-0.366947	-1.49444	0.0074834	0.0419605	0.0303837	3491	tags=41%, list=30%, signal=29%	baz/ogre/M6/pyd/Mcr/par-6/aPKC/zip/ed/step/shg/crb/ex/Lasp/cno/Egfrap/LanB1/kirre/dlg1/Nrx-IV/CASK/smash/mud/kibra/if/Swip-1/sinu/kon/cora/Lar/Cont/yrt/mew/Fak/bbg/p120ctn/Inx7/Cad86C/N/scb/rhea/alpha-Cat/Csk/metro/Itgbn/Mdr65/Schip1/l(2)gl/Zyx/slow/hbs/ena/sns/PVRAP/wech/plum/stan/bark/shakB/CG45263/CadN/tei/kug/fred
85	GO:0005747	mitochondrial respiratory chain complex I	45	0.546077	1.79323	0.0077947	0.0421989	0.0305563	2463	tags=67%, list=21%, signal=53%	ND-B12/ND-B18/ND-30/ND-PDSW/ND-20L/ND-B14/ND-B14.5B/ND-18/ND-ASHI/ND-B14.7/ND-B17/ND-MNLL/CG9034/ND-39/ND-20/ND-75/ND-ACP/CG11752/NP15.6/ND-42/ND-15/ND-13A/ND-B15/ND-B14.5A/ND-19/ND-B17.2/ND-51/ND-24/ND-MWFE/ND-13B
86	GO:0030964	NADH dehydrogenase complex	45	0.546077	1.79323	0.0077947	0.0421989	0.0305563	2463	tags=67%, list=21%, signal=53%	ND-B12/ND-B18/ND-30/ND-PDSW/ND-20L/ND-B14/ND-B14.5B/ND-18/ND-ASHI/ND-B14.7/ND-B17/ND-MNLL/CG9034/ND-39/ND-20/ND-75/ND-ACP/CG11752/NP15.6/ND-42/ND-15/ND-13A/ND-B15/ND-B14.5A/ND-19/ND-B17.2/ND-51/ND-24/ND-MWFE/ND-13B
87	GO:0045271	respiratory chain complex I	45	0.546077	1.79323	0.0077947	0.0421989	0.0305563	2463	tags=67%, list=21%, signal=53%	ND-B12/ND-B18/ND-30/ND-PDSW/ND-20L/ND-B14/ND-B14.5B/ND-18/ND-ASHI/ND-B14.7/ND-B17/ND-MNLL/CG9034/ND-39/ND-20/ND-75/ND-ACP/CG11752/NP15.6/ND-42/ND-15/ND-13A/ND-B15/ND-B14.5A/ND-19/ND-B17.2/ND-51/ND-24/ND-MWFE/ND-13B
88	GO:0000786	nucleosome	20	0.627857	1.7408	0.00804938	0.0430825	0.0311962	1500	tags=65%, list=13%, signal=57%	His2A:CG33808/His2A:CG33832/His2A:CG33835/His2A:CG33838/His2A:CG33841/His2A:CG33844/His2A:CG33847/His2A:CG33850/His2A:CG33862/His2A:CG33865/BigH1/cid/His3.3A
89	GO:0033178	proton-transporting two-sector ATPase complex, catalytic domain	18	0.66423	1.80066	0.00827969	0.0438172	0.0317282	2367	tags=56%, list=20%, signal=44%	ATPsynepsilonL/ATPsynbetaL/ATPsynO/ATPsyngamma/Vha14-1/ATPsyndelta/blw/ATPsynbeta/sun/Vha36-1
90	GO:0046540	U4/U6 x U5 tri-snRNP complex	19	0.621663	1.69516	0.00956582	0.0495348	0.0358683	3460	tags=79%, list=29%, signal=56%	SmB/CG10418/SmE/LSm3/Dim1/Prp18/CG11586/hoip/CG2021/Prp31/SmD2/CG17768/U4-U6-60K/CG6610/CG9344
91	GO:0071013	catalytic step 2 spliceosome	125	0.390086	1.55799	0.00957041	0.0495348	0.0358683	4329	tags=56%, list=37%, signal=36%	aub/LSm7/BCAS2/SmB/CG10418/Prp38/SmE/Mfap1/CG5641/SNRPG/Cypl/Cbp20/Phf5a/LSm3/U2A/SmD3/CG3225/CG6066/SmF/x16/tsu/CG7483/CG6179/Srrm1/CG17764/c12.1/Srp54/Bx42/snf/CG9667/Prp19/SmD2/Mtr4/noi/nonA/CG14641/Ref1/PQBP1/REG/CG11777/B52/CG4622/U4-U6-60K/Tango4/cyp33/Sf3a1/Sf3a2/CG2931/l(2)37Cb/snRNP-U1-70K/Cdc2rk/CG16865/CG4849/Pep/lark/caz/Sf3b2/beag/mago/SF2/fand/CG8833/Cdc5/CG6015/CG13625/cactin/Smu1/…

## Sheet: GSEA.GO.BP.CytoTranslation
	geneID	A2	A5	P3	P4	control.AVG	tub_ppx.AVG	logFC.tub_ppx_WT
83	RpS5b	3.01176	2.55727	4.19015	4.86928	2.78452	4.52972	1.7452
57	RpS10a	1.50974	1.10922	2.43073	2.43883	1.30948	2.43478	1.1253
44	RpL37b	2.17732	1.67438	2.73895	2.96939	1.92585	2.85417	0.92832
71	RpS19b	3.37509	2.70769	3.76978	3.80072	3.04139	3.78525	0.743861
25	RpL22-like	3.54851	3.14996	3.96498	3.95735	3.34924	3.96116	0.611928
6	eIF2D	3.82293	3.85239	4.41683	4.41466	3.83766	4.41575	0.578087
62	RpS14a	9.12708	8.94368	9.31846	9.8342	9.03538	9.57633	0.540951
20	RpL17	9.77129	9.66177	9.98423	10.5296	9.71653	10.2569	0.540389
13	RpL10Ab	10.032	9.89757	10.2774	10.6467	9.96477	10.4621	0.497289
69	RpS18	9.80942	9.61636	10.0725	10.3172	9.71289	10.1948	0.481945
76	RpS25	9.91015	9.83469	10.1626	10.5311	9.87242	10.3468	0.474423
70	RpS19a	9.68703	9.64868	9.98436	10.2986	9.66785	10.1415	0.473647
87	RpS9	9.75522	9.49823	9.94852	10.2424	9.62673	10.0955	0.468754
23	RpL19	10.2825	10.1518	10.554	10.8127	10.2171	10.6833	0.466204
56	RpLP2	9.97869	9.76145	10.2366	10.4199	9.87007	10.3282	0.458153
86	RpS8	10.4137	10.3293	10.5943	11.0633	10.3715	10.8288	0.457265
72	RpS2	9.95438	9.83024	10.1562	10.5371	9.89231	10.3467	0.454359
38	RpL34b	9.44895	9.2923	9.68938	9.95913	9.37062	9.82426	0.45363
29	RpL26	9.86729	9.84106	10.0426	10.5722	9.85417	10.3074	0.453198
17	RpL13A	10.0489	9.93198	10.2716	10.6127	9.99042	10.4421	0.451726
63	RpS14b	8.04268	7.85193	8.13148	8.66243	7.94731	8.39696	0.449649
36	RpL32	9.52084	9.45885	9.76615	10.1058	9.48984	9.93595	0.446104
21	RpL18	9.40835	9.31501	9.68111	9.92089	9.36168	9.801	0.439322
14	RpL11	9.56917	9.46678	9.80515	10.1053	9.51798	9.95522	0.437241
26	RpL23	10.1379	9.96716	10.3601	10.6183	10.0525	10.4892	0.436723
52	RpL8	10.4548	10.3778	10.6334	11.0647	10.4163	10.849	0.432717
45	RpL39	9.00131	8.82599	9.23359	9.45324	8.91365	9.34341	0.429766
68	RpS17	9.65704	9.5531	9.93667	10.1257	9.60507	10.0312	0.426128
28	RpL24	9.61863	9.53569	9.82052	10.1861	9.57716	10.0033	0.426127
4	DENR	4.99809	4.81523	5.24869	5.41633	4.90666	5.33251	0.425851
8	eIF3a	8.28807	8.45668	8.55321	8.9882	8.37237	8.7707	0.398332
74	RpS23	10.4224	10.2914	10.6807	10.8299	10.3569	10.7553	0.398323
3	CG8635	5.87508	5.86034	6.11793	6.40077	5.86771	6.25935	0.391636
42	RpL36A	9.61299	9.54646	9.84491	10.0875	9.57973	9.96622	0.386497
16	RpL13	10.0201	10.0765	10.2597	10.6092	10.0483	10.4344	0.386141
67	RpS16	9.77532	9.6456	10.0215	10.168	9.71046	10.0948	0.384309
22	RpL18A	9.61185	9.58693	9.80987	10.152	9.59939	9.98092	0.381537
73	RpS21	8.90028	8.74179	9.15164	9.24042	8.82104	9.19603	0.374991
35	RpL31	9.85549	9.73673	10.0792	10.2563	9.79611	10.1677	0.371635
59	RpS11	9.8337	9.74792	10.0482	10.2759	9.79081	10.1621	0.371271
2	CG6195	4.99648	4.84126	5.19465	5.38342	4.91887	5.28903	0.370162
60	RpS12	9.29294	9.15655	9.50231	9.68344	9.22475	9.59287	0.368128
58	RpS10b	9.87484	9.90603	10.1671	10.3413	9.89043	10.2542	0.363811
43	RpL37A	9.33201	9.27848	9.60348	9.7274	9.30524	9.66544	0.3602
31	RpL27A	10.1488	10.0178	10.2868	10.5899	10.0833	10.4383	0.355037
1	CG5515	5.31435	5.11951	5.49631	5.64305	5.21693	5.56968	0.352752
51	RpL7A	10.5625	10.5419	10.7742	11.0348	10.5522	10.9045	0.352326
53	RpL9	9.86158	9.71799	10.0846	10.1987	9.78979	10.1416	0.351845
9	eIF3i	7.66505	7.5795	7.83403	8.11375	7.62228	7.97389	0.351609
41	RpL36	9.74798	9.62677	9.91243	10.1639	9.68737	10.0382	0.350815
54	RpLP0	10.4308	10.4403	10.6647	10.8698	10.4355	10.7673	0.331727
84	RpS6	10.35	10.2762	10.4651	10.8235	10.3131	10.6443	0.331157
30	RpL27	9.73096	9.75202	10.0105	10.1285	9.74149	10.0695	0.328006
39	RpL35	9.76718	9.76056	9.9987	10.1828	9.76387	10.0908	0.326899
50	RpL7	10.1149	10.0725	10.2863	10.5366	10.0937	10.4114	0.317757
82	RpS5a	10.1322	10.1281	10.325	10.5693	10.1302	10.4471	0.316945
77	RpS26	10.2842	10.2225	10.4344	10.6935	10.2533	10.5639	0.310609
49	RpL6	10.1846	10.1809	10.3034	10.6727	10.1828	10.488	0.305268
81	RpS4	10.1965	10.3043	10.4235	10.683	10.2504	10.5532	0.302843
48	RpL41	10.2854	10.2273	10.5548	10.5591	10.2564	10.5569	0.300579
10	MCTS1	5.14311	5.16472	5.39477	5.51339	5.15391	5.45408	0.300165
85	RpS7	10.3154	10.321	10.4854	10.7514	10.3182	10.6184	0.300158
79	RpS3	10.0336	10.0509	10.2167	10.4508	10.0423	10.3338	0.291472
11	Rack1	10.4417	10.4381	10.5777	10.8842	10.4399	10.7309	0.291048
34	RpL30	9.14411	9.0527	9.40724	9.35413	9.09841	9.38069	0.282281
7	eIF2gamma	6.97391	7.05078	7.21525	7.35827	7.01234	7.28676	0.274417
37	RpL34a	7.10574	6.98484	7.3242	7.30306	7.04529	7.31363	0.268339
61	RpS13	9.61324	9.71786	9.82636	10.0409	9.66555	9.93365	0.268099
18	RpL14	9.91644	9.83867	10.1447	10.141	9.87755	10.1428	0.265286
64	RpS15	10.0099	9.88381	10.1849	10.2355	9.94685	10.2102	0.263317
27	RpL23A	10.5867	10.6227	10.6789	11.0564	10.6047	10.8676	0.262935
55	RpLP1	10.6066	10.4847	10.7552	10.861	10.5456	10.8081	0.262464
65	RpS15Aa	9.55917	9.42254	9.76113	9.74366	9.49086	9.75239	0.261536
46	RpL4	10.6339	10.6931	10.7631	11.0825	10.6635	10.9228	0.259286
89	Trm7-34	3.46007	3.27535	3.57057	3.67509	3.36771	3.62283	0.255115
40	RpL35A	9.32977	9.32031	9.5097	9.6459	9.32504	9.5778	0.252763
12	RpL10	10.0411	9.8977	10.3286	10.0973	9.96939	10.2129	0.243557
19	RpL15	10.2747	10.2467	10.4492	10.5447	10.2607	10.4969	0.236227
24	RpL22	9.52807	9.63698	9.63325	10.004	9.58253	9.81864	0.236113
15	RpL12	9.62805	9.57353	9.74005	9.92567	9.60079	9.83286	0.23207
78	RpS28b	9.52241	9.45103	9.74066	9.67304	9.48672	9.70685	0.220131
33	RpL3	10.9433	10.9927	11.0026	11.3634	10.968	11.183	0.214996
88	sta	10.5546	10.5725	10.6209	10.9319	10.5635	10.7764	0.212899
32	RpL29	9.07198	9.02589	9.39029	9.12806	9.04894	9.25917	0.210236
47	RpL40	9.73163	9.65439	9.83212	9.96359	9.69301	9.89786	0.204846
66	RpS15Ab	5.18832	5.14235	5.41863	5.3149	5.16533	5.36677	0.201432
80	RpS30	9.78246	9.63283	9.88159	9.93308	9.70764	9.90733	0.199693
75	RpS24	9.54622	9.58822	9.71509	9.81231	9.56722	9.7637	0.196479
5	eIF2beta	7.21259	7.20532	7.3595	7.44911	7.20895	7.4043	0.19535
Showing 51 to 89 of 89 entries, 8 total columns

## Sheet: GSEA.GO.BP.MitoTranslation
	geneID	A2	A5	P3	P4	control.AVG	tub_ppx.AVG	logFC.tub_ppx_WT
56	mRpS14	3.10593	2.84012	3.72399	4.05982	2.97302	3.8919	0.918878
3	CG12848	3.24263	3.02669	3.64991	4.00137	3.13466	3.82564	0.690975
48	mRpL48	3.02254	3.07811	3.49436	3.79928	3.05032	3.64682	0.596496
27	mRpL2	3.85238	3.73106	4.32367	4.28493	3.79172	4.3043	0.512577
64	mRpS26	3.77082	3.62081	4.09657	4.28392	3.69582	4.19025	0.494432
22	mRpL15	3.3291	3.3161	3.68596	3.93148	3.3226	3.80872	0.486119
31	mRpL27	3.6223	3.39939	3.89786	4.0748	3.51085	3.98633	0.475487
58	mRpS18C	2.49615	2.39743	2.90265	2.9388	2.44679	2.92072	0.473932
12	mEFTu1	5.88233	5.93411	6.21177	6.5508	5.90822	6.38129	0.473069
47	mRpL47	3.89169	3.69088	4.25936	4.25542	3.79129	4.25739	0.466106
6	CG6094	2.97978	2.72468	3.44182	3.135	2.85223	3.28841	0.436178
60	mRpS22	4.63063	4.54243	4.86768	5.1742	4.58653	5.02094	0.434408
42	mRpL42	3.50766	3.47399	3.64569	4.15685	3.49083	3.90127	0.410443
50	mRpL50	3.28157	3.34104	3.63916	3.79562	3.3113	3.71739	0.406086
37	mRpL36	3.32463	2.98797	3.49005	3.61969	3.1563	3.55487	0.398572
67	mRpS31	3.71286	3.54065	4.03762	4.0126	3.62676	4.02511	0.398353
16	mRpL1	3.72097	3.46185	3.98696	3.97823	3.59141	3.98259	0.391184
4	CG17141	2.26116	2.37134	2.6291	2.74747	2.31625	2.68828	0.372037
19	mRpL12	4.58894	4.41341	4.78468	4.95999	4.50118	4.87233	0.371157
40	mRpL40	3.13844	3.28089	3.55447	3.6036	3.20966	3.57904	0.369376
21	mRpL14	3.28672	3.22163	3.73462	3.51224	3.25418	3.62343	0.369257
26	mRpL19	3.95749	4.10326	4.3427	4.44475	4.03037	4.39372	0.363351
9	GatC	3.5183	3.42559	3.89986	3.74937	3.47194	3.82461	0.352672
44	mRpL44	3.74468	3.74102	4.03742	4.14787	3.74285	4.09265	0.349791
39	mRpL39	4.24468	4.1253	4.46774	4.57338	4.18499	4.52056	0.335569
55	mRpL9	3.78989	3.92462	4.12384	4.23747	3.85725	4.18065	0.3234
29	mRpL22	4.61894	4.47785	4.78348	4.95623	4.54839	4.86985	0.32146
70	mRpS6	3.00362	3.12892	3.27894	3.48265	3.06627	3.3808	0.314525
15	mRF1	2.41488	2.04993	2.3837	2.70174	2.23241	2.54272	0.310316
46	mRpL46	3.49816	3.55292	3.82085	3.84562	3.52554	3.83324	0.307696
49	mRpL49	3.45781	3.35057	3.74325	3.67764	3.40419	3.71045	0.306258
10	HisRS	5.93535	5.92761	6.05426	6.41804	5.93148	6.23615	0.30467
45	mRpL45	4.28886	4.25006	4.46097	4.67927	4.26946	4.57012	0.300659
52	mRpL52	3.77654	3.5839	4.06666	3.8931	3.68022	3.97988	0.299664
65	mRpS28	3.18513	3.28685	3.45115	3.60807	3.23599	3.52961	0.293617
41	mRpL41	2.97041	2.69538	3.36589	2.8851	2.83289	3.12549	0.292602
11	Lrpprc2	4.19591	4.50999	4.56515	4.72292	4.35295	4.64404	0.291089
18	mRpL11	2.94517	2.88578	3.08989	3.31391	2.91547	3.2019	0.286422
36	mRpL35	3.13741	3.40355	3.57346	3.53655	3.27048	3.55501	0.284526
69	mRpS35	3.76343	3.588	3.95715	3.96062	3.67572	3.95888	0.283166
78	TyrRS-m	3.09509	3.19246	3.37763	3.45248	3.14378	3.41506	0.271281
24	mRpL17	3.46333	3.14077	3.63968	3.50037	3.30205	3.57003	0.267975
72	mRRF1	2.9424	2.51426	3.02888	2.96099	2.72833	2.99494	0.266609
38	mRpL38	4.09289	4.04118	4.21247	4.42539	4.06704	4.31893	0.251892
17	mRpL10	3.68072	3.67926	4.07302	3.78515	3.67999	3.92909	0.249096
32	mRpL28	5.37263	5.25307	5.44618	5.67518	5.31285	5.56068	0.247825
68	mRpS34	3.49749	3.57805	3.85136	3.71672	3.53777	3.78404	0.246271
20	mRpL13	3.31191	3.38128	3.62471	3.55	3.34659	3.58736	0.240762
66	mRpS29	4.15984	4.12042	4.32846	4.43069	4.14013	4.37957	0.239451
62	mRpS24	2.90082	2.72117	3.18852	2.909	2.81099	3.04876	0.237767
28	mRpL21	3.38848	3.42936	3.64823	3.61614	3.40892	3.63218	0.223265
2	CG11679	3.43872	3.53531	3.6555	3.76328	3.48701	3.70939	0.22238
63	mRpS25	3.14134	3.31393	3.45982	3.43992	3.22763	3.44987	0.222235
51	mRpL51	3.50968	3.39764	3.69432	3.65485	3.45366	3.67458	0.220924
53	mRpL53	3.75461	3.59934	3.90503	3.8838	3.67697	3.89441	0.21744
13	mIF2	2.40308	2.53285	2.54563	2.82439	2.46797	2.68501	0.217043
59	mRpS2	3.58572	3.67504	3.7489	3.92606	3.63038	3.83748	0.207099
5	CG3862	3.12463	3.22479	3.30049	3.46105	3.17471	3.38077	0.206057
1	bonsai	4.02547	4.05069	4.31239	4.16561	4.03808	4.239	0.200922
14	mIF3	3.13218	3.24237	3.35814	3.41358	3.18727	3.38586	0.198586
30	mRpL24	4.40058	4.26721	4.62851	4.40525	4.3339	4.51688	0.182986
71	mRpS9	5.13828	5.12896	5.27475	5.35676	5.13362	5.31576	0.182136
33	mRpL3	4.19745	4.12731	4.30417	4.38103	4.16238	4.3426	0.180219
7	eEF5	10.0059	9.96847	10.236	10.0923	9.98719	10.1642	0.176967
57	mRpS17	3.65613	3.61116	3.80571	3.81296	3.63364	3.80933	0.175692
77	tko	3.88285	3.66573	4.07506	3.81936	3.77429	3.94721	0.172922
75	Slimp	2.40484	2.9108	2.78808	2.8697	2.65782	2.82889	0.171072
61	mRpS23	3.29315	3.106	3.42258	3.31568	3.19958	3.36913	0.169553
73	mRRF2	2.55012	2.3712	2.58585	2.67091	2.46066	2.62838	0.167719
54	mRpL54	3.04959	3.06563	3.34837	3.10169	3.05761	3.22503	0.167417
74	rswl	3.28515	3.59836	3.59623	3.61929	3.44176	3.60776	0.166003
43	mRpL43	3.5879	3.48099	3.79469	3.59857	3.53445	3.69663	0.162183
23	mRpL16	4.17338	4.00652	4.21901	4.283	4.08995	4.251	0.16105
35	mRpL34	2.51868	2.49271	2.67483	2.65496	2.50569	2.6649	0.159203
34	mRpL30	4.70685	4.45611	4.87092	4.59325	4.58148	4.73209	0.15061
25	mRpL18	2.8558	3.21726	3.21208	3.15627	3.03653	3.18417	0.14764
8	GatA	2.86924	2.62589	2.99098	2.79815	2.74757	2.89457	0.146999
76	Suv3	3.44911	3.5034	3.69811	3.54678	3.47625	3.62245	0.146193
Showing 1 to 28 of 78 entries, 8 total columns

## Sheet: GSEA.GO.BP.RibosomeBiogensis
	geneID	A2	A5	P3	P4	control.AVG	tub_ppx.AVG	logFC.tub_ppx_WT
116	RpS5b	3.01176	2.55727	4.19015	4.86928	2.78452	4.52972	1.7452
4	CG10993	1.09136	0.359976	1.52885	1.7467	0.725668	1.63777	0.912105
110	RpS19b	3.37509	2.70769	3.76978	3.80072	3.04139	3.78525	0.743861
54	Fib	5.5006	5.56592	5.89456	6.4638	5.53326	6.17918	0.645919
47	CG9123	3.12614	2.8541	3.54034	3.68095	2.99012	3.61065	0.620525
35	CG6999	1.68588	1.79358	2.19273	2.51045	1.73973	2.35159	0.611861
22	CG32706	2.64985	2.24482	2.91136	3.13571	2.44733	3.02354	0.576202
105	RpS14a	9.12708	8.94368	9.31846	9.8342	9.03538	9.57633	0.540951
87	RpL10Ab	10.032	9.89757	10.2774	10.6467	9.96477	10.4621	0.497289
109	RpS19a	9.68703	9.64868	9.98436	10.2986	9.66785	10.1415	0.473647
120	RpS9	9.75522	9.49823	9.94852	10.2424	9.62673	10.0955	0.468754
119	RpS8	10.4137	10.3293	10.5943	11.0633	10.3715	10.8288	0.457264
122	Rrp40	3.2011	3.00218	3.50538	3.60529	3.10164	3.55533	0.453691
93	RpL34b	9.44895	9.2923	9.68938	9.95913	9.37062	9.82426	0.45363
91	RpL26	9.86729	9.84106	10.0426	10.5722	9.85417	10.3074	0.453198
106	RpS14b	8.04268	7.85193	8.13148	8.66243	7.94731	8.39696	0.449649
83	Rbm13	3.93815	4.09068	4.19102	4.73245	4.01442	4.46174	0.447316
21	CG32409	4.16093	4.15284	4.42327	4.76283	4.15688	4.59305	0.436166
26	CG40813	3.79034	3.3222	3.91659	4.02378	3.55627	3.97018	0.413917
46	CG9107	3.55933	3.77788	3.89327	4.25192	3.6686	4.07259	0.403987
8	CG11858	3.71155	3.85471	4.09931	4.26395	3.78313	4.18163	0.398498
27	CG41562	3.46829	3.18957	3.69746	3.73823	3.32893	3.71785	0.388916
108	RpS16	9.77532	9.6456	10.0215	10.168	9.71046	10.0948	0.384309
65	Mrm2	2.56319	2.46845	2.87296	2.91753	2.51582	2.89524	0.379423
33	CG6833	3.4938	3.5129	3.82828	3.9355	3.50335	3.88189	0.378538
111	RpS21	8.90028	8.7418	9.15164	9.24042	8.82104	9.19603	0.374991
52	dbe	3.64168	3.89629	4.06282	4.22296	3.76898	4.14289	0.373908
103	RpS12	9.29294	9.15655	9.50231	9.68344	9.22475	9.59287	0.368128
68	mtTFB1	4.77738	4.62655	4.99671	5.13736	4.70196	5.06704	0.365072
12	CG14543	3.0001	2.76814	3.29566	3.20247	2.88412	3.24907	0.364949
58	l(2)09851	4.45931	4.52539	4.76971	4.92458	4.49235	4.84715	0.354799
99	RpL7A	10.5625	10.5419	10.7742	11.0348	10.5522	10.9045	0.352326
126	Sas10	3.84131	3.81215	3.95512	4.40221	3.82673	4.17866	0.351936
6	CG11417	4.12276	4.31022	4.358	4.75839	4.21649	4.5582	0.341704
61	mbm	3.62687	3.47274	3.91456	3.85649	3.5498	3.88553	0.335722
100	RpLP0	10.4308	10.4403	10.6647	10.8698	10.4355	10.7673	0.331727
117	RpS6	10.35	10.2762	10.4651	10.8235	10.3131	10.6443	0.331157
94	RpL35	9.76718	9.76056	9.9987	10.1828	9.76387	10.0908	0.326899
98	RpL7	10.1149	10.0725	10.2863	10.5366	10.0937	10.4114	0.317757
30	CG6712	3.72029	3.67896	3.856	4.17812	3.69963	4.01706	0.317434
115	RpS5a	10.1322	10.1281	10.325	10.5693	10.1302	10.4471	0.316945
123	Rrp42	3.0746	2.92149	3.244	3.38253	2.99805	3.31326	0.315219
17	CG2260	3.49245	3.45855	3.70829	3.87244	3.4755	3.79036	0.314862
44	CG8939	4.66008	4.91816	4.99063	5.19942	4.78912	5.09503	0.305907
97	RpL6	10.1846	10.1809	10.3034	10.6727	10.1828	10.488	0.305268
23	CG3527	3.19116	3.11842	3.48292	3.43524	3.15479	3.45908	0.304291
24	CG3817	3.40518	3.15374	3.57145	3.59444	3.27946	3.58295	0.303486
74	Non3	4.25843	4.17071	4.4863	4.54766	4.21457	4.51698	0.302411
18	CG2972	4.49866	4.39418	4.50886	4.98445	4.44642	4.74666	0.300237
118	RpS7	10.3154	10.321	10.4854	10.7514	10.3182	10.6184	0.300158
48	CG9166	3.10771	2.84598	3.18033	3.36591	2.97684	3.27312	0.296278
121	Rrp4	4.08736	3.91716	4.10993	4.47138	4.00226	4.29066	0.288395
36	CG7006	3.52894	3.35146	3.86511	3.56778	3.4402	3.71645	0.276245
55	hoip	4.94501	4.99449	5.36602	5.12152	4.96975	5.24377	0.274022
25	CG4038	4.69997	4.75078	4.9539	5.0423	4.72538	4.9981	0.272719
92	RpL34a	7.10574	6.98484	7.3242	7.30306	7.04529	7.31363	0.268339
104	RpS13	9.61324	9.71786	9.82636	10.0409	9.66555	9.93365	0.268099
88	RpL14	9.91644	9.83867	10.1447	10.141	9.87755	10.1428	0.265286
63	Mettl5	3.51316	3.37889	3.68141	3.73951	3.44603	3.71046	0.264437
107	RpS15	10.0099	9.88381	10.1849	10.2355	9.94685	10.2102	0.263317
89	RpL23A	10.5867	10.6227	10.6789	11.0564	10.6047	10.8676	0.262935
45	CG9004	3.27198	3.47977	3.79231	3.48513	3.37588	3.63872	0.262841
1	ais	2.69032	3.01123	3.00641	3.20784	2.85077	3.10713	0.256357
95	RpL35A	9.32977	9.32031	9.5097	9.6459	9.32504	9.5778	0.252763
41	CG8064	3.84629	4.10551	4.18293	4.27354	3.9759	4.22823	0.25233
53	eIF6	5.06505	5.12325	5.23677	5.45417	5.09415	5.34547	0.251321
77	Nop60B	6.10774	6.29232	6.30696	6.58305	6.20003	6.445	0.244972
72	Nle	3.52047	3.65815	3.70006	3.96815	3.58931	3.83411	0.244797
75	nop5	5.81957	5.94262	6.07249	6.17898	5.8811	6.12573	0.244637
86	RpL10	10.0411	9.8977	10.3286	10.0973	9.96939	10.2129	0.243557
37	CG7246	3.02034	3.17445	3.40653	3.26818	3.09739	3.33736	0.239962
32	CG6769	4.44808	4.44955	4.46621	4.91021	4.44882	4.68821	0.239394
40	CG7728	4.74137	4.92537	4.90495	5.2396	4.83337	5.07227	0.2389
67	Mtr4	4.83881	4.9238	5.03371	5.20319	4.8813	5.11845	0.237147
82	Ran	8.17013	8.20977	8.41006	8.43517	8.18995	8.42262	0.232664
128	Surf6	3.62134	3.48485	3.65625	3.89865	3.5531	3.77745	0.224353
114	RpS28b	9.52241	9.45103	9.74066	9.67304	9.48672	9.70685	0.220131
62	mbo	4.99452	5.12458	5.30198	5.25428	5.05955	5.27813	0.218577
60	LTV1	6.74453	6.73137	6.77309	7.13528	6.73795	6.95419	0.216236
127	sta	10.5546	10.5725	10.6209	10.9319	10.5635	10.7764	0.212899
5	CG11123	3.76732	4.05678	4.01837	4.22839	3.91205	4.12338	0.211331
79	Pop4	2.96292	3.03132	3.21199	3.20164	2.99712	3.20682	0.209694
38	CG7488	3.89888	3.63209	3.88408	4.04385	3.76548	3.96396	0.198481
2	bys	4.15951	4.20346	4.29563	4.4628	4.18148	4.37922	0.197732
3	CG10903	3.55888	3.56167	3.77433	3.74036	3.56027	3.75735	0.197071
34	CG6937	4.13459	4.18554	4.4198	4.29347	4.16007	4.35663	0.196569
124	Rrp45	3.31922	3.3823	3.40575	3.6826	3.35076	3.54417	0.193411
13	CG14683	3.88961	3.61116	3.97759	3.9029	3.75038	3.94025	0.189862
59	l(2)34Fd	3.45525	3.43511	3.49865	3.76993	3.44518	3.63429	0.189113
70	nclb	4.52959	4.54138	4.55212	4.89555	4.53549	4.72383	0.188344
71	NHP2	4.85174	4.77283	5.08219	4.91	4.81228	4.9961	0.183819
29	CG5800	3.8711	4.01347	4.08676	4.14769	3.94228	4.11723	0.174943
101	RpLP0-like	4.45188	4.52881	4.76086	4.56697	4.49035	4.66392	0.173569
16	CG1785	4.80929	4.91748	4.9462	5.11543	4.86339	5.03082	0.167432
56	Ip259	7.22586	7.22441	7.29533	7.48344	7.22513	7.38938	0.164251
50	CG9344	4.1841	3.8979	4.21645	4.19381	4.041	4.20513	0.164133
39	CG7637	3.81795	3.62895	4.21792	3.55497	3.72345	3.88645	0.162995
14	CG1542	4.48647	4.38776	4.62174	4.57173	4.43712	4.59673	0.159617
73	Nnp-1	5.26546	5.2806	5.43635	5.41878	5.27303	5.42757	0.154533
64	Mpp6	3.15373	2.81416	3.11341	3.16041	2.98394	3.13691	0.152967
11	CG12909	3.15083	3.30097	3.35249	3.4029	3.2259	3.37769	0.151794
42	CG8204	3.1632	2.97009	3.21298	3.21812	3.06665	3.21555	0.148904
85	RIOK2	4.10353	4.19986	4.25834	4.33281	4.15169	4.29558	0.143884
129	wcd	3.67179	3.71958	3.66515	4.01147	3.69569	3.83831	0.142619
15	CG1671	4.45047	4.46438	4.56312	4.62695	4.45743	4.59504	0.137606
130	Zfrp8	3.44237	3.36871	3.32999	3.74987	3.40554	3.53993	0.134387
81	pths	5.10978	5.32209	5.24359	5.45107	5.21594	5.34733	0.131396
125	Rtc1	3.22719	3.41535	3.48036	3.42101	3.32127	3.45069	0.129413
43	CG8545	5.50265	5.70481	5.59546	5.87019	5.60373	5.73283	0.129098
19	CG30349	4.79174	4.90105	4.90479	5.04344	4.8464	4.97411	0.127718
76	Nop56	5.99369	5.85789	6.09097	6.00878	5.92579	6.04988	0.124091
84	Rheb	6.38125	6.42709	6.55822	6.49824	6.40417	6.52823	0.124066
57	l(1)G0020	3.99561	4.19792	4.07576	4.36466	4.09676	4.22021	0.123448
7	CG11837	2.85804	2.93328	3.02284	3.01312	2.89566	3.01798	0.122321
31	CG6724	4.24522	4.26678	4.20299	4.54924	4.256	4.37612	0.120118
80	ppan	3.57747	3.53094	3.68223	3.66556	3.55421	3.6739	0.11969
69	Mybbp1A	4.11586	4.3065	4.27973	4.37705	4.21118	4.32839	0.117205
20	CG32344	4.34156	4.59736	4.53349	4.63565	4.46946	4.58457	0.11511
112	RpS27	9.21086	9.10593	9.37342	9.17174	9.15839	9.27258	0.114183
90	RpL24-like	6.55447	6.25894	6.45765	6.57884	6.40671	6.51825	0.111537
102	Rpp20	3.76869	3.92982	3.89628	4.01684	3.84926	3.95656	0.107306
113	RpS27A	10.2815	10.2107	10.3967	10.3098	10.2461	10.3533	0.107133
66	mTerf3	2.99861	3.02171	3.25595	2.97829	3.01016	3.11712	0.106955
28	CG4338	3.731	3.66678	3.82633	3.78465	3.69889	3.80549	0.106602
78	pix	8.42335	8.5422	8.53365	8.63947	8.48278	8.58656	0.103785
96	RpL5	11.1133	10.9964	11.1912	11.1241	11.0548	11.1577	0.102802
10	CG12863	2.43389	2.74306	2.81736	2.56349	2.58848	2.69042	0.101948
9	CG12608	4.39948	4.3527	4.42591	4.52882	4.37609	4.47736	0.101269
49	CG9246	4.91771	5.05481	5.12292	5.05082	4.98626	5.08687	0.100608
51	CG9799	4.3563	4.46163	4.40789	4.6075	4.40896	4.50769	0.0987331
Showing 1 to 28 of 130 entries, 8 total columns

## Sheet: DEGs_FDR<0.05
	geneID	logFC	AveExpr	t	P.Value	adj.P.Val	B
1	CG3588	12.4814	1.57338	14.3606	4.25768e-06	0.007145	3.18201
2	LysC	8.93879	-0.190578	9.34	5.92056e-05	0.0316131	1.83039
3	CG33664	-8.27892	-1.75772	-20.7381	4.26526e-07	0.00146508	3.7105
4	CG3526	7.88361	-1.90445	18.8615	7.74622e-07	0.00151658	3.52199
5	CG45489	-7.60187	-2.09665	-19.985	5.3838e-07	0.00146508	3.54062
6	CG12498	7.59078	-2.05043	19.9308	5.47661e-07	0.00146508	3.55427
7	CG43182	-6.34005	-1.92364	-9.92793	4.10009e-05	0.0267577	1.84563
8	Hsp70Bb	5.30614	5.66238	21.3042	3.59945e-07	0.00146508	6.88462
9	Ste:CG33239	5.04756	-0.13569	8.78699	8.52596e-05	0.038521	1.52014
10	CR43214	4.81083	0.572971	4.34758	0.00418461	0.14828	-1.52092
11	CR43215	4.81083	0.572971	4.34758	0.00418461	0.14828	-1.52092
12	CR43217	-4.80899	-0.730498	-3.75701	0.00841891	0.176918	-2.15427
13	Ste:CG33244	4.77159	-1.54057	4.66978	0.00292103	0.132997	-1.22022
14	Ste:CG33245	4.77159	-1.54057	4.66978	0.00292103	0.132997	-1.22022
15	Muc4B	4.75226	-0.917185	8.45088	0.000107469	0.0431331	1.30422
16	PGRP-SC1a	4.53978	-1.59426	4.59969	0.00315455	0.135881	-1.28889
17	betaNACtes6	4.33603	-0.800773	8.18239	0.000130044	0.0450391	1.17404
18	CG11893	4.30737	1.1116	7.17033	0.000280706	0.0598708	0.890865
19	Antdh	4.00118	1.06303	8.36917	0.000113827	0.0431331	1.61789
20	y	-3.89738	1.37751	-12.5455	9.82521e-06	0.0144271	3.42221
21	CG13560	3.8101	1.74569	10.8067	2.4512e-05	0.0239672	2.95746
22	PGRP-SC1b	3.56544	-0.230061	8.6701	9.23267e-05	0.040169	1.42329
23	CG12446	-3.50014	0.0197747	-8.50317	0.000103614	0.0431331	1.44589
24	Cpr76Bc	3.48338	-0.814594	5.83084	0.000899479	0.0905182	-0.24834
25	Rab9D	3.30046	-0.988301	6.74208	0.000399339	0.0660708	0.349677
26	pre-mod(mdg4)-P	-3.19665	1.8136	-3.37085	0.0136844	0.195852	-2.80161
27	CG9040	3.14781	5.28823	19.5236	6.23597e-07	0.00146508	6.72239
28	sordd2	-3.07537	3.90628	-7.03412	0.000313425	0.0619635	0.862683
29	Ste:CG33237	3.03543	-0.231648	5.75577	0.000965667	0.0914813	-0.260033
30	CG34291	3.03353	2.83501	8.40555	0.000110945	0.0431331	1.92094
31	Uro	3.02705	3.51086	3.98828	0.0063625	0.169635	-2.25587
32	RYa-R	2.97928	-0.905356	5.42273	0.00133415	0.104481	-0.576247
33	Ir54a	-2.97781	0.901322	-3.36946	0.0137089	0.195852	-2.70116
34	BaraA1	2.97288	0.56661	1.532	0.173479	0.428391	-5.06916
35	CR44383	-2.85337	0.86104	-4.14398	0.00529339	0.157024	-1.77041
36	Sdic2	-2.76728	2.18802	-6.38202	0.000544605	0.078018	0.389674
37	CG45492	-2.72965	2.05498	-6.88221	0.000355155	0.0623385	0.801356
38	TwdlX	2.61122	3.15642	8.04474	0.000143695	0.0450391	1.67892
39	CG13461	2.60776	1.50567	5.45376	0.00129382	0.103391	-0.435055
40	Hsp70Bbb	-2.59887	0.345505	-5.80172	0.000924522	0.0905182	-0.154079
41	ssp7	2.58462	0.477606	6.96971	0.000330396	0.0619635	0.73108
42	ORY	-2.58176	-0.980228	-5.3207	0.0014771	0.109129	-0.670938
43	CG11700	2.57135	3.08561	9.5302	5.24555e-05	0.0308097	2.64379
44	Muc30E	-2.55921	0.217384	-5.96136	0.000796256	0.0905182	-0.0356412
45	CG10073	2.53358	0.382132	2.8692	0.0265717	0.230701	-3.29814
46	lcs	-2.50376	-0.493461	-6.54115	0.000474052	0.0710981	0.280618
47	CG12729	-2.48729	-0.0169069	-5.69984	0.00101857	0.0930449	-0.267285
48	betaNACtes2	2.46599	1.07758	6.13472	0.000679267	0.0839932	0.167186
49	CG15404	2.46129	5.78781	8.02583	0.000145695	0.0450391	1.54268
50	CG5909	2.43832	1.11752	2.11052	0.0765579	0.30843	-4.42633
51	e	-2.42057	7.15036	-1.89748	0.10363	0.343738	-5.45465
52	CG3857	-2.41212	5.34262	-7.92512	0.000156901	0.0465619	1.47037
53	His2B:CG17949	-2.33465	-1.74952	-1.44654	0.195295	0.452108	-4.92141
54	Amyrel	2.33189	1.92623	4.20606	0.00492405	0.154045	-1.80115
55	CG45491	2.33048	1.52894	5.39204	0.00137543	0.104917	-0.496838
56	CG32751	2.30326	0.282004	4.06192	0.00582963	0.164222	-1.83772
57	CG16775	2.30166	-0.528149	3.15303	0.0181754	0.207997	-2.86233
58	LysE	2.2784	2.63519	6.99869	0.000322634	0.0619635	0.890152
59	CG14219	-2.27622	-1.05258	-4.68738	0.00286546	0.132997	-1.22129
60	kl-3	-2.25576	1.41665	-5.78407	0.000940089	0.0905182	-0.128571
61	CG5866	2.24759	1.33112	4.88371	0.00231975	0.128288	-0.998978
62	CG7606	2.23874	7.14004	7.81319	0.000170528	0.0488584	1.37681
63	CG31698	2.21926	6.21607	11.0949	2.08782e-05	0.022296	3.56066
64	pre-mod(mdg4)-AD	2.17194	1.19024	7.14965	0.000285415	0.0598708	0.957378
65	CG7542	-2.169	0.0527212	-2.51931	0.043019	0.259737	-3.73129
66	CG4998	-2.1595	-0.692843	-4.41032	0.00389706	0.146258	-1.46627
67	CG31021	-2.11618	-0.593165	-3.89156	0.00714598	0.171459	-2.00497
68	Sgs5bis	2.10299	7.50208	5.51956	0.00121277	0.10172	-0.727263
69	salt	2.09097	3.07202	5.03219	0.00198421	0.125315	-1.01156
70	CG42391	-2.07577	-0.944779	-2.99489	0.0224286	0.218815	-3.03396
71	CG34451	-2.06552	0.279547	-3.75134	0.00847771	0.177518	-2.19732
72	CG3251	2.06128	0.628622	4.93156	0.00220511	0.127327	-0.93064
73	CG4415	2.03146	3.31488	6.89567	0.000351212	0.0623385	0.763547
74	CG8157	2.02323	5.95482	5.26656	0.00155991	0.111056	-1.03475
75	CG7465	2.01838	5.0817	4.71097	0.00279282	0.132997	-1.63409
76	CG8299	2.01698	4.73451	9.21141	6.43346e-05	0.0328582	2.42585
77	CG5246	1.99945	4.69688	9.95969	4.02175e-05	0.0267577	2.90932
78	CG9514	-1.99141	0.0555466	-4.11014	0.00550756	0.159746	-1.77859
79	CG5697	-1.98857	3.5077	-1.50655	0.17973	0.435496	-5.72367
80	CG34031	-1.97433	-0.479353	-3.18107	0.0175167	0.206443	-2.83546
81	CG4000	1.96523	2.79266	2.63789	0.0364838	0.252103	-4.01575
82	fiz	1.9569	6.3374	12.2137	1.15878e-05	0.0151247	4.1514
83	CG8586	1.95119	4.16172	9.56634	5.12751e-05	0.0308097	2.6786
84	CG14205	-1.94653	-0.11815	-1.25106	0.254825	0.510911	-5.31552
85	mag	1.93258	8.09339	11.6797	1.52484e-05	0.0179123	3.88038
86	CG8160	1.92906	1.75365	3.52718	0.0112108	0.192008	-2.6283
87	Alp10	-1.91415	3.34088	-6.68002	0.000420881	0.0686678	0.56948
88	CG42500	1.91153	11.1179	6.54505	0.000472457	0.0710981	0.446069
89	CG9759	1.90496	1.02403	5.36192	0.00141736	0.1074	-0.516836
90	CR43211	-1.90181	0.861376	-5.8856	0.000854428	0.0905182	-0.0466867
91	CR43213	-1.90181	0.861376	-5.8856	0.000854428	0.0905182	-0.0466867
92	CR43216	-1.90181	0.861376	-5.8856	0.000854428	0.0905182	-0.0466867
93	CG4757	-1.8872	0.922201	-3.43078	0.0126719	0.195852	-2.6489
94	CG11816	-1.88672	-0.698186	-4.60878	0.00312312	0.135881	-1.27216
95	BaraA2	-1.87669	3.34001	-2.85918	0.0269358	0.231641	-3.81627
96	para	-1.86925	4.05648	-9.36606	5.82245e-05	0.0316131	2.55145
97	CG45081	-1.86924	-0.41766	-3.2016	0.0170507	0.206058	-2.81532
98	CG44329	1.86553	-0.247458	3.79443	0.00804146	0.176897	-2.12181
99	CG14852	1.86535	5.53107	2.48501	0.0451302	0.261944	-4.64214
100	SkpE	1.8605	-0.303151	3.34907	0.0140739	0.19637	-2.64201
101	Obp56e	1.86011	1.40242	3.91431	0.00695251	0.171382	-2.10129
102	Lsp1alpha	1.85049	11.1243	4.2293	0.00479323	0.152958	-2.00041
103	CG8028	1.81528	1.12395	4.35484	0.00415014	0.14828	-1.56231
104	LManIII	-1.79523	2.57545	-2.26129	0.0618254	0.288902	-4.51723
105	CG42269	-1.79115	3.13068	-1.41541	0.203848	0.460591	-5.77078
106	LUBEL	-1.78057	0.719053	-4.71824	0.00277085	0.132997	-1.1497
107	CG8087	1.77476	3.42363	3.1688	0.0178017	0.207141	-3.39892
108	Myo81F	-1.75804	0.853374	-3.97618	0.00645504	0.169635	-1.97789
109	RpS5b	1.75589	3.65004	5.79329	0.000931919	0.0905182	-0.29968
110	CG42857	1.75454	1.56049	5.7583	0.000963348	0.0914813	-0.155251
111	CG42580	1.74804	0.443907	5.32857	0.00146548	0.108956	-0.553785
112	CG7423	1.74778	-0.406135	4.01944	0.00613066	0.167997	-1.86825
113	CG43085	1.74095	3.76777	7.22921	0.000267782	0.0594356	1.00027
114	CG46311	1.74048	2.4395	1.87283	0.107321	0.347492	-5.02695
115	CR42785	-1.73795	0.0340651	-1.68581	0.139842	0.385615	-4.8311
116	Dro	-1.73047	3.09144	-1.25975	0.251874	0.507941	-5.95039
117	CG4962	1.72148	0.499501	2.48486	0.0451398	0.261944	-3.84228
118	TpnC25D	1.7102	2.27014	5.12774	0.00179725	0.120077	-0.824147
119	SdicB	-1.70467	0.31874	-4.2325	0.00477549	0.152958	-1.65449
120	CG16762	1.7012	4.33556	5.1709	0.00171937	0.119511	-1.04597
121	Taf12L	1.69907	2.50807	5.73965	0.000980597	0.0921526	-0.228304
122	CG43054	-1.6954	-0.368387	-4.69972	0.00282721	0.132997	-1.17035
123	CG15534	1.69012	2.18927	3.86653	0.00736568	0.171782	-2.2672
124	Cpr49Ab	1.68697	1.48779	4.59284	0.0031785	0.135881	-1.32791
125	CG6295	1.67449	5.02168	3.96196	0.00656584	0.169635	-2.57064
126	CG30083	1.67369	0.159789	3.13748	0.0185523	0.20868	-2.94367
127	DptA	-1.67176	6.14538	-1.2025	0.271882	0.5259	-6.3874
128	CG13063	1.67162	1.69542	3.75826	0.00840592	0.176918	-2.33304
129	CG3348	1.67005	6.05005	10.3341	3.21659e-05	0.0239672	3.11262
130	CG11286	-1.66111	0.297335	-3.9694	0.00650763	0.169635	-1.94858
131	CG15930	1.65881	1.03602	4.67195	0.00291409	0.132997	-1.21169
132	kl-5	-1.61663	2.10544	-4.75278	0.00266912	0.132997	-1.21477
133	CARPB	1.61349	5.24772	4.3183	0.00432681	0.150441	-2.13762
134	Drsl2	-1.60827	4.92847	-1.71532	0.134142	0.379887	-5.70154
135	CG2070	-1.59519	2.61459	-0.834099	0.434332	0.660973	-6.28171
136	CG31404	-1.59501	0.66804	-3.88424	0.00720949	0.171459	-2.07291
137	CG16736	-1.59275	-0.0457098	-2.95274	0.023735	0.222889	-3.1621
138	Kots	1.58623	0.518438	4.91517	0.00224364	0.127327	-0.946605
139	pre-mod(mdg4)-B	1.58522	1.02487	3.78244	0.00816034	0.176918	-2.22613
140	CG8568	-1.58268	5.46201	-10.4117	3.074e-05	0.0239672	3.16055
141	Frq1	-1.57533	3.43309	-6.84252	0.000367077	0.0634126	0.695094
142	CG3706	1.57331	2.09563	6.48467	0.000497831	0.0731002	0.47414
143	Rab9Db	1.56788	0.131193	4.55575	0.0033116	0.138184	-1.3069
144	CG14443	1.56327	-0.362452	3.69126	0.00913024	0.179836	-2.23697
145	Or45b	-1.56021	-0.297108	-3.97765	0.00644374	0.169635	-1.91663
146	Nplp2	1.55251	3.72625	1.53564	0.172601	0.427032	-5.74767
147	tut	1.54513	1.71736	3.66466	0.00943659	0.180619	-2.45661
148	Lcp65Ad	1.5442	0.397192	4.01957	0.0061297	0.167997	-1.89688
149	AgmNAT	-1.54359	0.816523	-5.29762	0.00151178	0.110304	-0.577106
150	CG15142	1.53807	0.914149	4.57387	0.0032458	0.137212	-1.31102
151	CG33966	1.53325	2.46802	6.58572	0.000456195	0.0710981	0.545955
152	CG12112	-1.53143	3.36085	-6.26343	0.000604979	0.0816861	0.179701
153	CG34432	-1.53035	-0.560407	-3.95929	0.00658683	0.169635	-1.93225
154	PGRP-SC2	1.52982	6.29608	4.39897	0.00394739	0.147206	-2.05608
155	Rcd-1r	1.5263	1.62437	4.06735	0.00579235	0.163614	-1.94855
156	CG32284	-1.5168	1.76478	-2.25927	0.0620025	0.289025	-4.36841
157	CG11131	1.50807	3.79117	3.7238	0.00877019	0.179836	-2.72665
158	CG34244	-1.50718	4.67931	-0.84223	0.430088	0.658043	-6.67994
159	CG7924	-1.50447	6.79208	-0.98957	0.358409	0.60166	-6.59433
160	CG43393	-1.50407	-0.251917	-4.11409	0.00548209	0.159746	-1.76854
161	pre-mod(mdg4)-X	-1.49306	1.92112	-2.95536	0.0236515	0.222889	-3.43054
162	CG45069	1.49105	3.14811	5.62248	0.00109724	0.096912	-0.418416
163	CG15293	1.4819	2.26131	6.1723	0.000656558	0.0834798	0.192539
164	CG10097	-1.47892	0.00872084	-3.67946	0.00926478	0.179836	-2.26996
165	Jon25Biii	1.47628	9.32605	4.67732	0.00289705	0.132997	-1.56887
166	CG8665	-1.47285	4.04273	-10.4436	3.01742e-05	0.0239672	3.2073
167	stum	1.47124	0.367794	2.9776	0.0229549	0.220282	-3.1741
168	CG43843	1.47071	1.10487	4.44917	0.0037301	0.143194	-1.45946
169	CG13877	1.46975	0.175684	2.64262	0.0362461	0.251377	-3.59252
170	CG13403	1.46848	5.80229	8.16584	0.000131605	0.0450391	1.627
171	CG15754	1.46631	0.0957515	3.74201	0.00857565	0.177939	-2.20102
172	CG14406	1.46622	4.20626	3.36596	0.0137708	0.195852	-3.27793
173	CG34334	1.46597	1.84345	5.05646	0.00193473	0.123518	-0.862726
174	CR45391	-1.46593	0.0236858	-3.36359	0.013813	0.195967	-2.65184
175	Alp9	-1.46533	3.57786	-4.09511	0.00560578	0.160781	-2.21916
176	nAChRalpha7	-1.46451	3.46738	-7.42462	0.000229509	0.0571931	1.17641
177	CG13325	1.46169	-0.0239339	3.14392	0.0183952	0.208279	-2.9208
178	CNMa	-1.46136	1.32233	-4.47064	0.00364123	0.142261	-1.45354
179	CG6484	-1.45763	0.38097	-3.54174	0.0110066	0.190377	-2.46247
180	kl-2	-1.45615	1.58796	-2.95357	0.0237086	0.222889	-3.37753
181	CG11891	1.44697	2.02791	4.86586	0.00236422	0.128576	-1.08339
182	CG7084	1.44614	2.86983	4.98523	0.00208404	0.127327	-1.05635
183	CG12477	1.43832	2.54464	6.63401	0.000437707	0.069483	0.582495
184	CG32564	1.43629	0.770022	3.31548	0.0146985	0.197412	-2.78363
185	Cngl	-1.43412	2.82903	-6.92131	0.000343838	0.0623385	0.807978
186	Zip89B	1.4298	4.46616	10.309	3.26446e-05	0.0239672	3.12105
187	CG13947	1.42939	2.21179	2.21907	0.0656322	0.293707	-4.51158
188	CG43156	-1.42923	0.871433	-3.47112	0.0120366	0.194279	-2.59895
189	CG1850	1.42638	1.32197	3.48976	0.0117548	0.192519	-2.6283
190	CG32817	1.42557	2.02817	5.66227	0.00105596	0.095418	-0.269109
191	CG9119	1.424	4.62578	4.20332	0.0049397	0.154045	-2.23458
192	CG32640	1.42134	4.3657	7.39086	0.00023565	0.0571931	1.07247
193	Mpcp1	1.42026	2.09145	3.00898	0.0220094	0.217625	-3.38613
194	Amy-p	1.41948	6.12191	2.1515	0.0722309	0.302818	-5.14404
195	CG30025	1.41621	2.4417	2.03428	0.085318	0.318707	-4.81736
196	CG7191	-1.41488	1.56948	-4.77446	0.00260739	0.132997	-1.14115
197	CG3457	-1.41278	-0.263258	-3.41165	0.012986	0.195852	-2.57316
198	CG17105	1.41176	4.98992	3.33354	0.0143589	0.196999	-3.41977
199	Lgr4	-1.4067	-0.137363	-3.74235	0.00857207	0.177939	-2.18907
200	CG11854	1.40624	8.67678	6.15317	0.000668009	0.0834798	-0.0257193
201	Vajk2	1.40591	6.90938	3.45071	0.0123535	0.195036	-3.27122
202	BomS3	-1.40408	1.41713	-1.99847	0.089773	0.323936	-4.6649
203	CG32819	1.40318	2.82498	7.70848	0.000184513	0.0504062	1.43246
204	CG17198	-1.4019	1.75636	-4.93805	0.00219006	0.127327	-0.982086
205	flz	1.40174	1.01675	3.76998	0.00828584	0.176918	-2.24291
206	CG32820	1.39828	2.83685	7.71927	0.000183013	0.0504062	1.44021
207	Nplp4	1.39318	6.1998	3.35039	0.01405	0.19637	-3.43393
208	alphaKap4	-1.3884	2.00395	-2.97225	0.0231204	0.220989	-3.42453
209	CG43218	-1.38532	0.0302529	-4.14573	0.00528253	0.157024	-1.74098
210	Pp1-Y2	-1.3836	0.201365	-3.85415	0.00747715	0.171782	-2.07763
211	Mal-A7	1.38169	0.854612	4.46966	0.00364526	0.142261	-1.42165
212	CG14693	-1.3735	2.39193	-4.36488	0.00410299	0.14828	-1.70054
213	CG30098	-1.37205	0.0475173	-2.41149	0.050028	0.270321	-3.88692
214	qvr	-1.37094	3.46927	-5.84374	0.000888625	0.0905182	-0.2424
215	cDIP	1.35671	2.70162	4.15586	0.00522041	0.15649	-1.99762
216	CG31627	-1.35541	1.39026	-4.81319	0.00250108	0.132355	-1.08652
217	CG13924	1.35033	0.053872	3.69491	0.00908908	0.179836	-2.25462
218	DIP-zeta	-1.34958	0.316329	-3.76426	0.00834425	0.176918	-2.19053
219	pre-mod(mdg4)-W	-1.33654	2.42604	-2.72288	0.032449	0.244679	-3.85153
220	CG31205	-1.33543	-0.229311	-1.5934	0.159227	0.410454	-4.9116
221	CG7213	1.33274	1.29119	4.71858	0.00276983	0.132997	-1.18
222	ng1	-1.33271	0.674997	-1.79187	0.12038	0.362964	-4.80842
223	Hsp70Ab	1.33258	3.00936	3.41425	0.0129427	0.195852	-3.00713
224	LysP	1.32743	0.86555	4.42859	0.0038175	0.145127	-1.46761
225	CG12502	-1.32703	0.154236	-2.88703	0.0259371	0.228477	-3.27117
226	Ir76a	-1.32652	1.16139	-3.75731	0.0084158	0.176918	-2.27626
227	Amy-d	1.32535	7.28869	2.49157	0.0447181	0.261659	-4.61112
228	CG13473	-1.32343	0.573833	-3.16713	0.0178408	0.207141	-2.95464
229	CG33281	1.32205	1.73689	3.08994	0.0197577	0.212172	-3.21754
230	CG14431	-1.31625	1.09015	-4.79345	0.00255463	0.132997	-1.08912
231	CG43060	1.30854	3.35339	6.97994	0.000327633	0.0619635	0.816996
232	CG43742	1.29462	0.175227	2.93487	0.0243135	0.224455	-3.21032
233	Obp56i	-1.29296	0.450228	-3.93754	0.0067609	0.170181	-1.99699
234	CG4830	1.29226	0.472403	2.6297	0.0368998	0.25276	-3.65063
235	Gat	1.29061	3.36045	4.26627	0.00459303	0.152958	-1.97288
236	CG43329	-1.2891	0.780572	-4.18151	0.00506656	0.155784	-1.73926
237	CG15599	1.28908	3.31727	7.22744	0.000268161	0.0594356	1.02652
238	CG14668	-1.28898	1.47981	-4.87843	0.00233279	0.128288	-1.02431
239	CG16964	-1.28696	1.66968	-3.58152	0.0104692	0.1886	-2.56284
240	Pzl	-1.28513	1.09434	-3.41895	0.0128652	0.195852	-2.69358
241	Cyp4e3	1.28412	3.41508	6.33868	0.000565842	0.0791303	0.24036
242	CG13982	-1.2811	-0.446433	-3.00069	0.0222549	0.218345	-3.06788
243	CG15734	-1.27905	1.41549	-3.54543	0.0109556	0.190368	-2.57367
244	CG18605	1.27778	2.11144	5.59355	0.00112841	0.0979991	-0.343271
245	jb	1.27556	0.203096	3.17663	0.0176192	0.206475	-2.90251
246	CG15125	-1.2752	1.49845	-4.20261	0.00494381	0.154045	-1.77927
247	Cyp305a1	1.27458	0.310946	3.69272	0.00911375	0.179836	-2.27497
248	Daao2	1.27255	1.99186	4.95812	0.00214423	0.127327	-0.982887
249	Cpr65Aw	1.27048	3.25868	4.80002	0.00253667	0.132997	-1.32552
250	Cpr65Au	1.26975	0.954392	2.43378	0.0484876	0.266846	-3.98817
251	Adgf-B	-1.26903	1.64997	-4.67203	0.00291384	0.132997	-1.2615
252	Jon66Cii	1.26783	8.3903	4.08315	0.00568534	0.1618	-2.3525
253	CG15456	1.26449	1.56578	3.96957	0.0065063	0.169635	-2.06371
254	CG9672	-1.26349	6.44368	-3.38667	0.0134089	0.195852	-3.38172
255	CG15044	1.26234	5.25749	6.88086	0.000355553	0.0623385	0.567741
256	Btnd	1.26166	3.97672	7.34947	0.000243437	0.0571931	1.06893
257	PPO2	1.25814	8.11446	2.19324	0.0680789	0.297737	-4.98477
258	Rbp4	1.2536	3.83666	6.16238	0.000662471	0.0834798	0.0232681
259	CG13085	1.25232	0.187687	3.44094	0.0125085	0.195852	-2.57076
260	CG13606	-1.25146	5.83199	-1.18183	0.279434	0.533119	-6.4247
261	IM33	1.24897	3.36356	2.62549	0.0371155	0.25276	-4.17625
262	CG45095	-1.24714	1.62242	-3.67407	0.00932685	0.179926	-2.43911
263	His2A:CG33808	1.24558	2.5482	5.82047	0.000908305	0.0905182	-0.160596
264	IBIN	-1.24294	2.20066	-1.17146	0.283287	0.536651	-5.87033
265	NT5E-2	1.23846	5.24666	4.77952	0.00259322	0.132997	-1.59286
266	CG18179	-1.2374	0.112185	-3.37672	0.0135815	0.195852	-2.64463
267	Ilp2	1.23715	1.55299	3.86761	0.00735605	0.171782	-2.18701
268	CG30110	-1.2368	2.01471	-3.62907	0.00986428	0.185503	-2.55482
269	CG7916	1.23676	6.815	4.54784	0.0033408	0.138184	-1.86261
270	CG34193	-1.23195	6.53958	-0.966421	0.369018	0.609685	-6.63329
271	CG34437	-1.22966	2.39073	-2.48034	0.0454263	0.26233	-4.18894
272	CG44013	-1.22717	0.196789	-2.10878	0.0767469	0.308432	-4.31391
273	CG10154	-1.22463	2.3219	-2.12769	0.0747141	0.30621	-4.67105
274	BomS2	-1.22252	0.237651	-2.93408	0.0243395	0.224455	-3.22025
275	CG43732	-1.22221	0.190786	-2.62801	0.036986	0.25276	-3.61839
276	CG18853	1.22179	1.85783	2.78801	0.0296783	0.238952	-3.65385
277	betaNACtes4	1.21925	1.94372	5.27208	0.00155124	0.111056	-0.651389
278	Syt7	-1.21816	2.81315	-3.46945	0.0120622	0.194369	-2.90318
279	CG12692	-1.21624	3.39402	-5.58181	0.00114135	0.0979991	-0.501599
280	CG3568	-1.21596	4.14515	-8.81226	8.38147e-05	0.038521	2.1658
281	fred	-1.21423	0.99174	-3.61284	0.0100664	0.185635	-2.43737
282	CG33458	-1.21421	1.22266	-4.67958	0.00288994	0.132997	-1.21895
283	CG13043	1.21366	2.04442	2.78569	0.0297723	0.239094	-3.69116
284	beat-Va	-1.21286	0.953819	-3.43226	0.012648	0.195852	-2.66035
285	Acbp4	1.21176	0.403207	1.8956	0.103907	0.343972	-4.62697
286	CG7906	-1.20971	7.13825	-0.948265	0.377508	0.616243	-6.62034
287	CG34426	1.20902	2.0563	2.18085	0.0692853	0.298656	-4.53967
288	bam	1.20675	0.355138	3.1107	0.0192212	0.209843	-3.00326
289	CG8738	1.2062	3.87295	5.69657	0.00102178	0.0930449	-0.445657
290	CG4783	-1.2043	3.5027	-3.46458	0.0121373	0.194591	-3.03884
291	CG13476	-1.20341	3.10709	-3.79684	0.00801782	0.176897	-2.5269
292	vas	1.20256	2.19959	5.48128	0.0012592	0.102164	-0.4624
293	armi	-1.19925	3.41813	-1.92676	0.0994064	0.336695	-5.18401
294	CG16749	1.19681	4.54758	4.94801	0.00216717	0.127327	-1.34182
295	CG18268	-1.19612	0.277793	-2.67819	0.0345084	0.248262	-3.56292
296	CG31784	-1.19597	3.2673	-5.28527	0.00153072	0.110996	-0.795666
297	CG13675	1.19587	0.0116172	3.42021	0.0128444	0.195852	-2.58265
298	CG31735	-1.19316	-0.550202	-1.39552	0.20949	0.465182	-5.09888
299	CG34434	1.1926	5.22478	6.02875	0.000748255	0.0870272	-0.23913
300	hog	1.19053	1.59041	3.78866	0.00809843	0.176918	-2.29027
301	CG12438	-1.18896	1.38967	-4.30443	0.00439604	0.151883	-1.65083
302	CG7330	-1.18811	-0.444277	-3.17467	0.0176647	0.206475	-2.85174
303	dpr8	-1.18781	1.38229	-4.74096	0.00270346	0.132997	-1.16454
304	CG43737	-1.18638	3.21103	-5.14866	0.001759	0.120077	-0.935142
305	CG9518	-1.1855	0.313026	-3.23946	0.0162263	0.204084	-2.83539
306	CG17191	1.18402	2.93623	2.91639	0.0249273	0.224455	-3.68235
307	Sdic4	1.18252	4.48537	5.8505	0.000883004	0.0905182	-0.362972
308	CG13312	1.182	0.362426	3.51983	0.0113154	0.192326	-2.4892
309	MFS1	1.17972	0.170948	2.39926	0.0508954	0.271027	-3.92065
310	CG46321	-1.17704	3.74411	-3.88051	0.00724209	0.171496	-2.53251
311	CG42711	-1.17447	1.76987	-2.39786	0.0509952	0.271027	-4.18426
312	CG42535	-1.17402	1.37836	-3.36611	0.0137681	0.195852	-2.8012
313	CG34012	-1.17149	0.974162	-3.15987	0.0180122	0.207644	-3.01542
314	CG43446	-1.16899	3.25344	-3.77768	0.00820801	0.176918	-2.57923
315	CG15056	1.1685	1.81348	4.55153	0.00332712	0.138184	-1.41241
316	CG9926	1.16619	0.525793	3.52704	0.0112129	0.192008	-2.49523
317	tbc	1.16323	3.51173	7.38249	0.000237201	0.0571931	1.13535
318	AttD	1.16235	1.33853	2.16366	0.0709951	0.300858	-4.42718
319	aub	1.16088	2.34732	5.50466	0.00123062	0.10172	-0.453236
320	CG16926	1.15896	8.43747	8.07672	0.000140383	0.0450391	1.6216
321	CG17364	-1.15598	0.0262074	-3.19417	0.0172176	0.206106	-2.8656
322	CG42590	-1.1559	0.369881	-2.83226	0.0279399	0.234101	-3.37032
323	CG17195	-1.15449	1.37106	-3.04134	0.0210777	0.215069	-3.23
324	DIP-beta	-1.15437	1.54869	-4.01627	0.00615383	0.167997	-2.00812
325	CG31106	-1.15328	2.15468	-4.89202	0.00229937	0.128288	-1.07468
326	CG5348	-1.15311	2.18859	-3.89982	0.00707503	0.171382	-2.23996
327	CG4653	1.15303	3.98472	6.20578	0.00063705	0.0832264	0.0442536
328	Muc68E	-1.15029	7.51112	-3.48749	0.0117888	0.192519	-3.19194
329	CG7968	1.14979	2.6569	3.84813	0.00753194	0.172414	-2.38005
330	COX6CL	-1.14731	2.79327	-4.17713	0.00509245	0.155784	-1.99422
331	CG32988	-1.14705	0.455	-3.28654	0.0152609	0.199634	-2.79051
332	CG14810	1.14654	1.20886	3.96255	0.00656116	0.169635	-2.03311
333	Corp	1.14527	1.20957	3.81748	0.00781827	0.176043	-2.20878
334	Vajk3	1.1437	6.53462	3.42361	0.0127886	0.195852	-3.32763
335	VhaM9.7-d	-1.14357	0.445575	-2.46449	0.0464447	0.264018	-3.87287
336	RpS10a	1.14332	1.85009	4.63496	0.00303452	0.135538	-1.32309
337	beat-Ib	-1.14179	0.0979474	-3.33302	0.0143687	0.196999	-2.69828
338	mt:ND4L	-1.14169	2.75327	-1.88177	0.105968	0.346452	-5.10598
339	PPO1	1.13798	7.55211	2.12923	0.0745509	0.306116	-5.11525
340	MtnC	1.13791	1.35403	3.88602	0.00719397	0.171459	-2.14172
341	CG43062	-1.13706	-0.0775748	-2.49899	0.0442572	0.261127	-3.75741
342	Gr64c	-1.13634	-0.245671	-1.83962	0.112501	0.352622	-4.60259
343	CG34227	1.13591	11.038	3.82465	0.00775024	0.175757	-2.51721
344	CG10834	-1.13426	0.322828	-2.39059	0.0515191	0.272488	-3.95525
345	CG9877	1.13097	5.54019	8.22713	0.000125931	0.0450391	1.6718
346	CG30413	-1.12908	-0.369008	-3.06527	0.0204163	0.213132	-2.99405
347	CG6220	1.12518	2.80257	4.65332	0.00297409	0.134371	-1.4279
348	CG43088	1.1238	-0.0405675	3.21253	0.0168081	0.205972	-2.83608
349	tomb	1.12324	1.35257	3.62863	0.00986969	0.185503	-2.46074
350	CG6283	1.11793	5.86542	2.83979	0.0276549	0.234101	-4.16373
351	Mst77Y-13	1.11789	0.232026	3.11209	0.0191859	0.209843	-2.98928
352	CR15821	-1.11752	0.371296	-3.04899	0.0208638	0.21448	-3.08676
353	IM18	-1.11746	1.72961	-1.04075	0.335808	0.582248	-5.9073
354	Mal-A1	1.11723	5.1794	3.51201	0.0114279	0.192326	-3.19901
355	pre-mod(mdg4)-C	1.1132	0.164783	1.1992	0.273077	0.527202	-5.43406
356	AsnS	-1.11316	5.23108	-2.83987	0.0276521	0.234101	-4.14555
357	CG43233	-1.11246	1.38795	-3.75997	0.00838836	0.176918	-2.30246
358	ovm	-1.11136	0.947333	-1.60881	0.155827	0.406645	-5.09619
359	CG43638	-1.1113	3.18957	-3.31226	0.01476	0.197704	-3.18943
360	Sgs8	1.10996	10.7287	4.6786	0.00289303	0.132997	-1.48608
361	CG34175	-1.10868	0.357202	-2.84784	0.0273541	0.233448	-3.3486
362	Eip78C	-1.10842	6.51035	-2.33495	0.0557177	0.279787	-4.87833
363	CG15343	1.10816	3.86145	3.282	0.0153512	0.200145	-3.352
364	beat-Ic	-1.10806	0.862781	-3.713	0.00888791	0.179836	-2.30098
365	nAChRalpha5	-1.10737	3.20067	-6.07419	0.000717743	0.0870272	0.00971549
366	CG9837	1.10735	5.30858	8.85271	8.15592e-05	0.038521	2.13916
367	Skadu	-1.1073	2.03074	-3.59358	0.010312	0.187412	-2.60549
368	CG1304	1.107	0.45644	1.91357	0.101287	0.339464	-4.61357
369	CG32939	-1.10689	3.18665	-1.70323	0.136449	0.382568	-5.44275
370	obst-E	1.10669	6.09378	7.36619	0.000240256	0.0571931	0.975567
371	CG13408	-1.10537	-0.484992	-2.68839	0.0340263	0.248262	-3.46446
372	DIP-lambda	-1.10438	0.172758	-3.36239	0.0138343	0.196017	-2.66851
373	CG1894	1.1035	0.2337	2.34178	0.0551839	0.278888	-4.00745
374	CG32006	-1.10263	1.24704	-3.307	0.0148609	0.19821	-2.86081
375	Sh	-1.10132	5.39721	-6.5312	0.000478143	0.0710981	0.235802
376	CG43321	-1.1013	0.952836	-3.00623	0.0220905	0.217699	-3.21647
377	RunxA	-1.10059	0.313056	-2.91022	0.0251362	0.225057	-3.26133
378	CG15784	-1.10035	8.73991	-2.77984	0.0300115	0.239094	-4.10431
379	Vajk1	1.09964	2.73926	2.10087	0.0776142	0.309409	-4.79716
380	SPR	1.09915	2.33459	4.34327	0.00420521	0.14828	-1.72092
381	CG12951	1.09771	5.3104	4.92437	0.00222192	0.127327	-1.43145
382	CG13641	1.09699	5.67792	5.81087	0.000916571	0.0905182	-0.477932
383	Acbp5	1.09546	2.29861	1.61362	0.154778	0.405029	-5.36207
384	betaNACtes1	1.09497	0.578153	3.44862	0.0123866	0.195048	-2.59845
385	CG13060	1.09404	1.55766	3.51401	0.0113991	0.192326	-2.63485
386	ATPsynepsilonL	1.09395	2.00629	4.09846	0.00558376	0.160766	-1.96769
387	CG13545	1.09365	0.852721	2.51919	0.0430264	0.259737	-3.85838
388	Adh	1.09331	8.06224	4.06709	0.0057941	0.163614	-2.39306
389	t-Grip128	-1.09331	1.7708	-3.72057	0.00880521	0.179836	-2.4037
390	Art2	1.09321	1.34889	4.26053	0.00462345	0.152958	-1.69732
391	Cyp4d1	1.09282	6.53657	4.70116	0.00282277	0.132997	-1.69263
392	CG32086	-1.09278	1.98671	-2.53418	0.0421363	0.258495	-4.03646
393	Jhedup	1.09098	2.03979	3.74251	0.0085703	0.177939	-2.41443
394	CG43210	-1.08539	0.14926	-2.79135	0.029543	0.238699	-3.39848
395	hemo	-1.08539	0.14926	-2.79135	0.029543	0.238699	-3.39848
396	CG33099	1.0838	4.16244	8.05923	0.000142183	0.0450391	1.61412
397	CG11912	1.08364	9.47001	3.81822	0.00781124	0.176043	-2.62699
398	Cpr49Ah	1.08273	3.02084	3.86348	0.00739301	0.171782	-2.42593
399	CG10752	-1.08224	2.35209	-3.5136	0.011405	0.192326	-2.76407
400	AANATL2	1.08135	5.99207	4.87509	0.00234111	0.128288	-1.5026
401	CG13311	1.08129	1.59287	2.18585	0.0687958	0.298524	-4.44527
402	Cyp6a8	-1.08069	2.48339	-2.65671	0.0355468	0.24928	-3.96227
403	CG7342	1.0806	6.12914	6.81047	0.000377035	0.0641889	0.488384
404	CG43120	-1.07845	3.19339	-2.9228	0.0247127	0.224455	-3.73106
405	CAH4	-1.07821	1.68024	-4.16357	0.00517362	0.15649	-1.84874
406	obst-H	-1.07469	2.27876	-4.26203	0.00461551	0.152958	-1.81168
407	CG43136	1.07241	0.370095	2.54604	0.0414454	0.256918	-3.75209
408	Kaz1-ORFB	1.07174	3.58859	6.6377	0.000436331	0.069483	0.489595
409	arg	1.07158	0.934989	3.40026	0.013177	0.195852	-2.69927
410	CG31804	-1.07116	1.96718	-2.32433	0.0565585	0.281354	-4.32727
411	wuc	1.07022	2.26739	4.0159	0.00615651	0.167997	-2.10752
412	stol	-1.06985	2.98966	-4.76281	0.00264036	0.132997	-1.33419
413	Lcp65Ab1	1.06793	8.7791	3.57974	0.0104926	0.1886	-2.98883
414	Gr64a	-1.06239	0.0138718	-2.58268	0.0393861	0.255525	-3.65836
415	CG11841	1.06133	0.213326	3.17797	0.0175882	0.206475	-2.90376
416	CG8138	-1.06119	2.41675	-3.7155	0.00886056	0.179836	-2.51283
417	nol	1.06091	2.90858	1.52506	0.175162	0.430248	-5.61127
418	CG42835	1.05938	1.07238	2.21965	0.0655781	0.293689	-4.30504
419	GstD4	1.05878	0.525975	2.36375	0.0535017	0.275893	-4.02055
420	unc79	-1.05784	2.7873	-5.33659	0.00145374	0.108771	-0.678427
421	CG10588	-1.05611	2.06316	-4.18072	0.00507124	0.155784	-1.8786
422	CG8870	-1.05603	0.651971	-3.31943	0.0146235	0.197412	-2.77075
423	Rbp6	-1.05078	6.07804	-7.91101	0.000158549	0.0465619	1.4206
424	SA-2	1.0501	1.70076	3.36443	0.013798	0.195967	-2.85149
425	lobo	-1.04928	2.65501	-5.40994	0.00135118	0.104776	-0.585898
426	GstT4	-1.04733	5.97059	-6.53436	0.000476842	0.0710981	0.229744
427	betaNACtes3	1.04671	1.57955	3.76773	0.00830878	0.176918	-2.31704
428	Obp99b	1.04665	12.6556	4.50644	0.00349834	0.140736	-1.59057
429	CG11584	-1.04624	0.620065	-2.81165	0.0287357	0.237108	-3.43107
430	Obp18a	1.04327	0.210215	2.67152	0.0348274	0.248262	-3.56374
431	dany	1.043	1.27299	3.53025	0.0111675	0.19179	-2.57609
432	CG11151	1.04182	7.35138	6.78074	0.000386553	0.0648691	0.500659
433	CG31275	-1.03895	2.78223	-3.6385	0.0097489	0.184413	-2.67811
434	Pebp1	1.03883	5.58597	3.49943	0.0116116	0.192457	-3.23765
435	CG31870	-1.03866	3.70659	-3.9043	0.00703689	0.171382	-2.50023
436	CG31313	1.0377	5.86804	5.09525	0.00185851	0.120077	-1.25188
437	CG2157	1.03448	1.64463	4.23288	0.00477341	0.152958	-1.76191
438	CG8774	-1.03414	0.443939	-1.58616	0.160849	0.412462	-5.03523
439	CG11741	1.03271	0.645678	2.26979	0.061087	0.288112	-4.16688
440	Gr39a	-1.03167	0.600039	-2.6972	0.033616	0.247889	-3.58205
441	SkpC	1.03147	1.73926	3.76224	0.00836492	0.176918	-2.34609
442	Lcp9	1.03079	4.45207	2.22562	0.0650264	0.293109	-4.95184
443	Lcp65Ac	1.02791	4.87867	3.02968	0.0214085	0.215867	-3.84791
444	Lmx1a	-1.02735	0.939579	-3.32715	0.0144781	0.197185	-2.7951
445	CG32182	-1.02659	-0.00548553	-2.86481	0.0267306	0.231382	-3.28547
446	CG11406	1.02567	0.380559	2.28249	0.0599996	0.286506	-4.10926
447	CG17571	1.02407	8.48644	6.20475	0.000637641	0.0832264	0.0130946
448	GstT3	-1.02339	4.45958	-5.80148	0.000924734	0.0905182	-0.417455
449	kmg	1.02159	2.84127	4.87232	0.002348	0.128288	-1.18714
450	CG32161	-1.02118	1.35589	-3.94199	0.0067249	0.170181	-2.07657
451	Pu	1.01967	8.70324	6.15567	0.000666503	0.0834798	-0.0245209
452	CG11590	1.01921	5.44231	5.87385	0.000863878	0.0905182	-0.408874
453	CG11459	1.0167	6.37391	3.06478	0.0204296	0.213132	-3.83644
454	GstD10	1.01626	3.49278	5.87082	0.00086633	0.0905182	-0.2248
455	CG5402	-1.01547	0.644744	-1.79032	0.120645	0.363482	-4.80997
456	CG17633	1.0137	8.61392	3.48949	0.011759	0.192519	-3.12142
457	dtr	-1.01213	4.17251	-3.96251	0.00656148	0.169635	-2.50098
458	CG43998	-1.01198	1.34449	-2.4993	0.0442376	0.261127	-3.96902
459	CG45002	-1.01021	2.12689	-4.2041	0.00493526	0.154045	-1.86018
460	MtnE	1.00789	3.5035	3.63124	0.00983753	0.185492	-2.8188
461	CR41597	-1.00672	3.27822	-2.08346	0.0795576	0.311964	-4.94305
462	FDY	1.0055	1.92266	2.75873	0.0308916	0.240347	-3.71076
463	CG12784	-1.00538	1.13008	-2.87847	0.0262398	0.229793	-3.4148
464	Mal-A4	1.0051	0.661672	1.35549	0.221271	0.477455	-5.35086
465	CG32192	-1.00492	4.63097	-2.5878	0.0391072	0.254409	-4.45824
466	GC	-1.00475	2.2596	-4.60558	0.00313414	0.135881	-1.40875
467	Actbeta	-1.00434	2.99814	-3.39803	0.0132146	0.195852	-3.03904
468	Hsp70Aa	1.00326	-2.07468	0.323032	0.756996	0.875336	-5.75613
469	CG31815	-1.00305	0.380645	-3.12188	0.0189389	0.20868	-2.99445
470	CG31802	-1.00268	3.89113	-5.94453	0.000808781	0.0905182	-0.20634
471	dpr11	-1.00191	1.97606	-4.43719	0.00378072	0.144195	-1.56556
472	CG32298	-1.00129	1.63358	-3.711	0.00890995	0.179836	-2.3976
473	mGluR	-1.00094	2.28856	-4.55219	0.00332469	0.138184	-1.47381
474	CG6034	1.00049	-0.141992	1.52514	0.175143	0.430248	-5.01135
475	CG8353	0.99997	2.35797	3.04612	0.0209439	0.214684	-3.39427
476	Nepl10	0.999715	4.05404	4.35479	0.00415037	0.14828	-1.98669
477	CG10734	-0.998984	5.53231	-3.94649	0.00668867	0.170181	-2.64366
478	Mhc	0.998213	8.76517	2.44261	0.0478907	0.266481	-4.58639
479	CG31259	-0.997896	1.88313	-3.16333	0.0179302	0.207216	-3.15154
480	CG43125	-0.997593	1.27191	-3.48299	0.0118563	0.19285	-2.63806
481	CG14855	0.996334	5.32395	4.24459	0.00470926	0.152958	-2.25233
482	Odc1	0.995702	5.49082	4.22488	0.00481778	0.152958	-2.28434
483	blanks	0.995665	4.88656	7.202	0.00027367	0.0595333	0.863855
484	CG17658	0.994583	-0.0264246	2.86081	0.0268761	0.231627	-3.28786
485	Eip93F	-0.994105	5.36894	-4.75154	0.00267268	0.132997	-1.64014
486	CG33510	-0.993072	-0.337763	-2.34393	0.0550165	0.278328	-3.93201
487	CG9899	0.991791	2.92397	5.59477	0.00112708	0.0979991	-0.429209
488	CG31909	-0.990016	4.24978	-2.72437	0.0323826	0.24463	-4.21049
489	zetaTry	0.989898	4.34913	4.32308	0.00430322	0.150441	-2.06786
490	CG1113	0.989621	3.36224	3.28716	0.0152486	0.199634	-3.25733
491	CG32483	0.988527	1.97197	2.78301	0.0298816	0.239094	-3.68628
492	CG6271	-0.988323	0.423984	-2.10519	0.0771401	0.309025	-4.3562
493	pre-mod(mdg4)-AE	-0.987099	3.52877	-4.59212	0.00318101	0.135881	-1.62116
494	Gyc32E	-0.985757	0.0851521	-2.9865	0.0226825	0.219493	-3.13765
495	CG45413	-0.983949	1.06678	-3.25631	0.0158733	0.201801	-2.90382
496	CG12725	0.983675	0.843493	3.20454	0.0169851	0.206058	-2.94119
497	Eglp3	0.983379	0.669338	2.45947	0.0467723	0.264396	-3.91313
498	NfI	-0.980998	3.40837	-3.04891	0.020866	0.21448	-3.59974
499	kairos	-0.978903	0.702628	-2.95209	0.0237558	0.22289	-3.25582
500	CG5773	0.975766	7.2537	4.84055	0.0024289	0.131357	-1.49741
501	CG12374	-0.975647	0.58419	-1.70319	0.136457	0.382568	-4.91239
502	CG31464	-0.974432	2.36415	-2.99122	0.0225392	0.219179	-3.4738
503	CG9297	0.973432	6.58135	2.21738	0.0657896	0.293964	-5.04437
504	CG42335	0.973318	2.06008	3.548	0.01092	0.190323	-2.66979
505	CG3819	0.972919	7.28757	5.78623	0.000938173	0.0905182	-0.461606
506	gdrd	-0.972411	3.6188	-3.7144	0.00887262	0.179836	-2.73444
507	GluClalpha	-0.969852	3.41286	-6.05521	0.000730318	0.0870272	-0.0370474
508	CG9406	-0.969575	1.76417	-2.74461	0.0314952	0.242447	-3.70407
509	CG7763	-0.967906	4.04553	-2.92344	0.0246914	0.224455	-3.89439
510	CG7514	-0.967578	1.33624	-3.23593	0.0163012	0.204163	-2.96837
511	CG17380	-0.967532	2.7761	-2.95716	0.0235943	0.222889	-3.60197
512	CG42784	-0.967187	2.78995	-4.76756	0.00262687	0.132997	-1.30034
513	CG5024	-0.965992	2.52236	-3.62613	0.00990047	0.185625	-2.64875
514	Cyt-b5-r	0.964635	3.62161	2.51981	0.0429889	0.259737	-4.38941
515	CG15040	0.964623	3.7574	5.54215	0.00118628	0.100254	-0.597205
516	ATPsynbetaL	0.96452	3.9606	6.03684	0.000742718	0.0870272	-0.122121
517	CG34238	-0.964043	0.570951	-2.15443	0.0719313	0.302123	-4.31341
518	CR43441	-0.963514	-0.0431361	-2.53411	0.04214	0.258495	-3.71664
519	CG4017	-0.963218	1.76189	-2.2785	0.0603391	0.286917	-4.35338
520	CG13898	-0.96291	3.56396	-5.27882	0.00154072	0.111036	-0.851637
521	CG30485	-0.962658	2.36193	-3.86506	0.00737884	0.171782	-2.31455
522	CG30414	0.960779	4.63503	4.82606	0.00246683	0.131717	-1.49888
523	CG6497	-0.960155	1.95146	-3.80364	0.00795141	0.176276	-2.32751
524	dpr10	-0.960027	1.02281	-3.52013	0.0113112	0.192326	-2.5598
525	CG30395	-0.957917	0.766147	-3.04908	0.0208614	0.21448	-3.13613
526	CG30325	-0.957554	0.609604	-3.07029	0.0202805	0.212797	-3.08849
527	CG30090	0.95666	2.38787	4.77715	0.00259985	0.132997	-1.23128
528	CG7299	0.954305	4.83856	3.88285	0.00722155	0.171459	-2.68272
529	CG9445	-0.954043	0.726222	-2.65848	0.0354599	0.24928	-3.65301
530	sunz	-0.953384	1.04248	-2.88176	0.0261232	0.229521	-3.39785
531	CG1138	-0.95282	2.41006	-3.01783	0.0217502	0.217435	-3.44613
532	DIP-kappa	-0.951664	0.982835	-3.29647	0.0150652	0.199292	-2.84094
533	Ran-like	-0.950275	3.83823	-3.88513	0.00720172	0.171459	-2.55013
534	CG14118	0.949984	2.69378	4.88011	0.00232864	0.128288	-1.1585
535	CG3984	0.949155	5.06124	5.2215	0.00163284	0.115548	-1.08485
536	t-Grip91	-0.948416	4.41156	-3.15265	0.0181844	0.207997	-3.62787
537	CG2955	-0.948349	5.78782	-3.54429	0.0109713	0.190368	-3.18366
538	CG7402	0.948085	3.66025	4.76143	0.00264431	0.132997	-1.44244
539	CG13581	-0.947817	2.02697	-3.59793	0.010256	0.187367	-2.60179
540	Rpt3R	0.947475	3.86197	5.13374	0.00178619	0.120077	-1.05159
541	yip3	0.947451	2.16035	3.28705	0.0152507	0.199634	-3.03212
542	yellow-e3	0.94671	0.572642	2.66928	0.0349352	0.248651	-3.61557
543	CG34241	-0.946338	2.87657	-3.12314	0.0189074	0.20868	-3.39197
544	CG6628	0.946262	0.224655	2.05218	0.0831742	0.316679	-4.3956
545	CG11588	-0.943405	3.27732	-4.16099	0.00518922	0.15649	-2.10207
546	Mlp60A	0.943084	6.43082	5.8763	0.000861892	0.0905182	-0.40555
547	CG17325	-0.943065	5.98584	-2.95394	0.0236968	0.222889	-4.00565
548	CG42305	-0.943065	5.98584	-2.95394	0.0236968	0.222889	-4.00565
549	CG8260	-0.942833	0.54206	-2.84828	0.0273374	0.233448	-3.37294
550	CG4704	-0.942812	0.640055	-2.51659	0.0431826	0.259737	-3.83286
551	fs(1)Yb	0.942693	0.943724	2.73518	0.0319056	0.244007	-3.58026
552	CG6048	0.942499	1.46267	2.04689	0.0838024	0.31674	-4.61453
553	CG15332	0.942452	1.7967	3.32523	0.0145142	0.197185	-2.92013
554	CG42867	-0.94225	1.13705	-1.81489	0.116516	0.358236	-4.8675
555	CG31230	-0.941886	1.02579	-2.61562	0.0376267	0.253484	-3.75706
556	PGRP-SD	0.941338	4.74988	7.27518	0.000258162	0.0594356	0.933993
557	CG14564	0.941244	-0.0512494	2.27453	0.0606785	0.2873	-4.06005
558	RpL37b	0.940548	2.37495	3.80191	0.00796822	0.176276	-2.39547
559	CG17217	-0.940116	1.01593	-2.77758	0.0301046	0.239094	-3.53488
560	MFS9	0.938661	3.99976	3.92291	0.00688087	0.171382	-2.52435
561	Hsdl2	0.938343	6.26007	6.28032	0.000595936	0.0814006	-0.00852237
562	Cpr62Bc	0.938167	2.15553	1.96626	0.0939805	0.328816	-4.86397
563	CG10993	0.938057	1.1463	2.82634	0.028166	0.234641	-3.48746
564	CG11672	-0.935993	3.66744	-3.60548	0.0101595	0.186408	-2.88882
565	fon	0.935839	9.37045	3.17672	0.017617	0.206475	-3.50043
566	t-cup	-0.934775	1.66344	-2.49893	0.0442605	0.261127	-4.02773
567	CG31467	-0.934398	2.30481	-3.43969	0.0125285	0.195852	-2.85601
568	CG32487	-0.932111	1.40798	-2.80358	0.0290536	0.23789	-3.56177
569	CG31265	0.931748	0.201961	2.42188	0.0493038	0.268287	-3.89741
570	CG30287	-0.931305	1.15886	-1.5706	0.164385	0.417233	-5.18731
571	CG32148	-0.931269	2.12724	-2.65546	0.0356085	0.24928	-3.89668
572	CG43851	-0.92993	0.988263	-2.43626	0.048319	0.266481	-3.99702
573	karr	0.929876	1.65375	3.06717	0.0203648	0.213132	-3.24223
574	CG6441	-0.929459	4.20492	-4.91515	0.00224369	0.127327	-1.34896
575	dpr21	-0.9293	1.30639	-2.62596	0.0370914	0.25276	-3.78885
576	Mlc2	0.928698	10.1511	2.80957	0.0288174	0.237423	-3.96026
577	CG6415	0.928418	4.36716	4.23729	0.00474914	0.152958	-2.1787
578	CG34302	0.926718	-0.103549	2.55179	0.0411153	0.256702	-3.68535
579	mRpS14	0.92529	3.42522	4.62931	0.00305342	0.135661	-1.55941
580	CG16723	0.924603	2.12735	3.61365	0.0100562	0.185635	-2.59647
581	CG13739	-0.924317	0.132933	-2.43227	0.0485898	0.266846	-3.87529
582	Mst36Fa	-0.923257	2.61036	-4.35285	0.00415955	0.14828	-1.75591
583	CG1213	-0.922499	3.68869	-1.2902	0.24176	0.498913	-6.0755
584	B9d2	0.921954	1.55493	3.69408	0.00909839	0.179836	-2.40771
585	tctn	0.921954	1.55493	3.69408	0.00909839	0.179836	-2.40771
586	l(2)03659	0.921921	1.12858	3.50591	0.0115167	0.192457	-2.59007
587	nxf2	-0.921876	5.36725	-7.6373	0.000194768	0.0519986	1.20453
588	CG42851	-0.921337	0.779103	-2.80481	0.0290048	0.23789	-3.46352
589	c12.2	0.921263	4.57835	5.63779	0.00108114	0.0965755	-0.598681
590	CG43049	-0.919569	1.5261	-2.1162	0.0759425	0.307668	-4.53372
591	unc-13	-0.919085	7.53229	-4.66005	0.00295225	0.1339	-1.69388
592	CG11345	0.918601	3.39079	2.74142	0.0316334	0.242875	-4.02866
593	Kif3C	-0.91832	1.8267	-2.72618	0.0323022	0.244179	-3.74179
594	CG14879	-0.918209	1.71612	-3.55016	0.0108904	0.190323	-2.61561
595	CG30427	0.91813	3.27715	4.25817	0.00463608	0.152958	-1.98001
596	Cpr66Cb	0.917818	1.76322	1.99775	0.0898661	0.323977	-4.74112
597	CG34136	-0.916831	5.15589	-5.99622	0.000771003	0.0887938	-0.276122
598	CG11425	0.916615	1.91794	3.74733	0.00851964	0.177925	-2.39263
599	CG7778	-0.916467	7.27812	-1.37246	0.216206	0.473396	-6.14786
600	CheB42c	-0.915613	0.970585	-3.00711	0.0220645	0.217625	-3.21987
601	CG4168	-0.915525	1.19181	-2.76421	0.0306605	0.240347	-3.58075
602	nAChRalpha6	-0.915485	3.93942	-5.12697	0.00179867	0.120077	-1.07384
603	FoxP	-0.915183	2.71043	-3.76718	0.00831442	0.176918	-2.50024
604	Cyp6g1	0.914684	7.31607	3.22036	0.0166365	0.205418	-3.57128
605	CG4956	-0.913453	0.947074	-2.91161	0.0250888	0.224804	-3.34416
606	Mctp	0.913355	5.20518	2.1717	0.0701902	0.300078	-5.10761
607	beat-IIa	-0.913194	2.81325	-3.77269	0.00825843	0.176918	-2.51175
608	CG8560	0.911638	8.28145	6.96267	0.000332315	0.0619635	0.702289
609	Uros2	-0.911471	2.54748	-3.25636	0.0158723	0.201801	-3.14656
610	Oatp26F	-0.909661	1.78098	-0.970607	0.367082	0.608025	-5.99149
611	CG31097	-0.909258	1.01027	-2.55028	0.0412017	0.256702	-3.84446
612	CG2267	-0.908347	5.25935	-5.00343	0.0020447	0.125755	-1.34455
613	Gfrl	-0.908281	1.59628	-3.43099	0.0126686	0.195852	-2.75209
614	CG43902	-0.908196	2.5671	-4.22163	0.00483597	0.153122	-1.90717
615	slf	0.907182	8.46074	5.18759	0.00169026	0.118188	-1.04013
616	CG46427	-0.90656	1.22092	-2.59315	0.0388179	0.254177	-3.81999
617	dysc	-0.906353	3.382	-4.92808	0.00221322	0.127327	-1.21177
618	Cpr11B	0.905533	0.989421	1.84391	0.111819	0.352178	-4.80075
619	Tsp66A	-0.905186	1.94934	-2.81873	0.0284594	0.235946	-3.63612
620	Phf7	0.904344	3.47883	4.51561	0.00346272	0.140736	-1.70321
621	CG43880	-0.904236	0.90037	-2.25855	0.0620649	0.289095	-4.22636
622	CG6324	0.903151	1.81637	3.85432	0.00747558	0.171782	-2.24374
623	Art6	0.90266	0.94606	2.88746	0.0259223	0.228477	-3.37543
624	CG8800	-0.902353	-0.401433	-2.25518	0.0623619	0.289095	-4.04177
625	CG34245	-0.901889	0.755044	-2.62548	0.037116	0.25276	-3.70254
626	CG13678	0.901411	2.18737	3.55885	0.0107718	0.189979	-2.67793
627	Argk1	0.901135	10.4869	2.95043	0.023809	0.223033	-3.73732
628	Cyp312a1	-0.900665	4.52561	-2.7985	0.029256	0.238044	-4.14591
629	Pgam5-2	-0.899683	-0.141026	-2.5542	0.0409774	0.256702	-3.67877
630	nht	0.899492	2.00483	3.13065	0.0187206	0.20868	-3.2166
631	CG31949	-0.89943	2.76862	-2.75527	0.0310383	0.240347	-3.8851
632	CG9733	0.898924	1.23377	1.26284	0.250828	0.506616	-5.56945
633	CG34290	0.898748	1.51474	3.61943	0.00998373	0.185625	-2.49686
634	CG32750	-0.898656	2.50587	-3.16293	0.0179398	0.207216	-3.26615
635	CG7214	-0.897639	2.47945	-3.44977	0.0123685	0.195036	-2.8744
636	CG43167	-0.896826	1.1337	-2.53429	0.0421295	0.258495	-3.88665
637	dpr20	-0.896748	0.581374	-2.72745	0.0322459	0.244179	-3.54008
638	CG42854	0.89642	0.728757	1.93154	0.0987345	0.335607	-4.63847
639	CG34370	-0.896059	2.7969	-4.64161	0.00301246	0.135066	-1.44658
640	CG11594	0.895839	5.88428	4.51064	0.00348197	0.140736	-1.93917
641	CG34194	0.894731	1.39265	3.39442	0.0132761	0.195852	-2.76876
642	CG31788	-0.894043	4.19746	-3.39123	0.0133305	0.195852	-3.26819
643	CG16713	0.892671	5.27259	2.61023	0.0379085	0.253484	-4.48094
644	SdicC	0.892506	2.1178	2.99394	0.0224573	0.218815	-3.42361
645	CG11714	-0.892418	3.94747	-3.93594	0.00677395	0.170181	-2.50388
646	trv	-0.892145	4.6823	-4.95363	0.00215439	0.127327	-1.36078
647	CG17207	0.891899	0.369047	2.74063	0.0316679	0.242927	-3.4934
648	CG46302	-0.891605	1.01686	-2.32582	0.0564397	0.281335	-4.15389
649	CG34354	-0.891575	2.48849	-4.15937	0.00519906	0.15649	-1.97061
650	CG43348	0.887336	-0.038829	2.32307	0.056659	0.281631	-3.99761
651	ppk3	0.886256	0.994056	3.06581	0.0204015	0.213132	-3.14435
652	CG11034	0.886076	4.87194	3.61353	0.0100576	0.185635	-3.04469
653	CG9691	0.885784	7.17547	5.71986	0.000999274	0.0924289	-0.535306
654	CG12464	-0.885627	1.43644	-2.04031	0.0845896	0.317919	-4.62137
655	Snap25	-0.885008	2.53785	-3.65006	0.0096095	0.182363	-2.62167
656	CG42710	-0.881871	1.18836	-2.54925	0.0412606	0.256702	-3.87533
657	CG17475	0.878692	2.20439	1.72717	0.131916	0.377112	-5.19838
658	ND-B14.5AL	-0.878107	1.37767	-2.2485	0.0629541	0.289862	-4.324
659	CG4053	0.878078	0.780916	1.56321	0.16609	0.418863	-5.12448
660	Pbgs	0.877983	5.65648	7.50116	0.00021625	0.0564509	1.08629
661	CG42752	-0.877381	0.35776	-2.28104	0.0601227	0.286506	-4.11062
662	sro	0.877187	5.37152	5.15053	0.00175563	0.120077	-1.18215
663	unc	0.876557	2.1985	3.97206	0.00648697	0.169635	-2.15434
664	CG14000	-0.875844	1.16481	-3.32308	0.0145546	0.197412	-2.8312
665	2mit	-0.875595	4.01477	-6.03813	0.000741843	0.0870272	-0.13215
666	FASN2	0.875557	1.4782	3.27275	0.0155371	0.200386	-2.94075
667	CG34204	-0.874884	1.43092	-2.83856	0.0277013	0.234101	-3.51852
668	CG43339	-0.87285	0.383228	-2.719	0.0326224	0.245127	-3.52513
669	CG17197	-0.872119	0.284636	-2.24584	0.0631914	0.289965	-4.14725
670	CG11251	-0.871938	2.55577	-3.80902	0.00789933	0.176079	-2.41991
671	Cpr67Fa2	0.871782	0.520969	2.2207	0.0654811	0.293679	-4.21581
672	CG14717	-0.871776	1.99852	-3.00329	0.0221778	0.218193	-3.3912
673	CG2269	-0.871398	5.18608	-7.0709	0.000304182	0.0619635	0.730176
674	CG10237	0.871333	5.56512	2.48411	0.0451874	0.261946	-4.67636
675	pre-mod(mdg4)-G	-0.871239	2.65029	-3.76549	0.00833171	0.176918	-2.49246
676	CG42733	-0.871191	2.17088	-2.671	0.0348523	0.248278	-3.88429
677	mmd	-0.870904	4.26171	-6.33895	0.000565705	0.0791303	0.130511
678	CG46281	-0.87022	1.96284	-3.11095	0.0192149	0.209843	-3.23809
679	CG34173	-0.869929	0.210008	-1.61667	0.154119	0.403934	-4.95932
680	CG34124	-0.868677	3.47614	-5.40655	0.00135575	0.104776	-0.704349
681	w-cup	-0.868144	5.85116	-3.50931	0.0114671	0.192434	-3.23285
682	ImpL1	-0.868117	1.70792	-1.63521	0.150161	0.398991	-5.21621
683	CG14191	0.867813	-0.236034	1.66613	0.143772	0.390766	-4.82527
684	CG43127	-0.867798	0.978961	-2.40201	0.0506991	0.271027	-4.04325
685	CG32631	-0.867217	1.46385	-2.27629	0.0605279	0.28695	-4.3015
686	Phae2	-0.866072	3.76742	-1.91958	0.100426	0.338121	-5.27742
687	CG34289	-0.865077	0.261681	-2.52215	0.0428491	0.259737	-3.7726
688	zpg	0.865008	-0.179188	2.46024	0.0467218	0.264396	-3.79785
689	CR30029	-0.864997	5.88759	-4.25724	0.00464101	0.152958	-2.25409
690	Mlc1	0.8644	8.33695	2.95829	0.0235584	0.222889	-3.87681
691	CG43072	-0.863749	0.0193655	-1.94347	0.0970746	0.333431	-4.51002
692	CG12674	0.863296	3.23348	3.88779	0.00717858	0.171459	-2.4388
693	b	-0.863049	5.75081	-1.45712	0.192465	0.449665	-6.10478
694	CG31516	0.86224	0.541842	2.33631	0.0556104	0.279684	-4.06255
695	Npc2d	0.862005	3.51856	3.97763	0.00644388	0.169635	-2.37512
696	Fatp3	0.861476	8.4977	5.06374	0.00192017	0.123258	-1.17638
697	Esp	-0.859688	3.02957	-2.86977	0.0265513	0.230693	-3.77787
698	CG30054	0.85938	0.197984	2.53887	0.0418616	0.257781	-3.74089
699	CG42654	-0.858719	-0.0677413	-2.51787	0.0431058	0.259737	-3.73602
700	CG5810	-0.858642	1.76461	-2.82835	0.0280889	0.234641	-3.59014
701	CG9259	0.856253	6.31461	2.785	0.0298004	0.239094	-4.24009
702	CG11162	0.856067	2.39538	3.12159	0.0189461	0.20868	-3.30056
703	PpY-55A	-0.855981	1.13453	-2.7342	0.0319483	0.244016	-3.61326
704	CG16779	-0.855245	2.07855	-3.93825	0.00675516	0.170181	-2.17976
705	CG3347	0.855027	2.41249	4.35826	0.00413401	0.14828	-1.71852
706	CG31741	0.854895	2.41817	2.36198	0.0536356	0.276057	-4.36762
707	CG34279	0.853801	6.93264	6.39038	0.000540616	0.078018	0.120466
708	CG9988	-0.852378	0.283587	-1.22064	0.265397	0.519481	-5.43717
709	CG6333	-0.851612	1.58343	-3.14355	0.0184041	0.208279	-3.13058
710	CG6865	0.851291	1.48074	2.22499	0.0650848	0.293109	-4.37439
711	CG32228	-0.850583	1.97032	-2.54785	0.041341	0.256813	-4.01859
712	CG8508	-0.850234	2.30628	-2.43259	0.0485686	0.266846	-4.24703
713	FMRFaR	-0.849946	1.65279	-2.55145	0.0411344	0.256702	-3.95403
714	sff	-0.849038	3.63359	-3.95045	0.00665697	0.170181	-2.43366
715	CG3611	-0.848036	1.67047	-3.14585	0.0183485	0.208279	-3.14165
716	CG1552	-0.847465	1.119	-2.54704	0.0413881	0.256834	-3.86728
717	mbl	-0.846745	8.03002	-4.5987	0.00315802	0.135881	-1.73946
718	wa-cup	-0.8465	3.32449	-2.49057	0.0447807	0.261659	-4.37819
719	CG42831	-0.846196	0.918494	-2.25623	0.0622692	0.289095	-4.23321
720	CG30430	-0.846037	3.80291	-2.59367	0.0387898	0.254177	-4.32601
721	CG30161	-0.845912	1.31053	-3.26655	0.0156629	0.201084	-2.92576
722	CG9962	0.845428	1.84446	2.95519	0.023657	0.222889	-3.42851
723	CG8093	0.844974	4.36462	1.97519	0.0927941	0.328053	-5.3005
724	Ret	-0.844751	2.23065	-3.50007	0.0116021	0.192457	-2.7648
725	CG33223	0.844282	1.87029	3.20092	0.0170659	0.206058	-3.09954
726	Jon66Ci	0.842598	11.2219	3.19704	0.017153	0.206106	-3.34554
727	Ppr-Y	-0.84158	-0.31601	-2.27733	0.0604391	0.286917	-4.02374
728	Rdl	-0.841317	3.67013	-4.46819	0.00365125	0.142261	-1.79622
729	CG43750	-0.840889	2.36633	-3.43916	0.012537	0.195852	-2.86906
730	LManVI	-0.840111	4.20262	-1.2257	0.263616	0.517755	-6.24821
731	futsch	-0.838348	4.98521	-4.71645	0.00277625	0.132997	-1.66261
732	Idgf5	0.838223	4.59133	3.34108	0.0142198	0.196469	-3.38872
733	CG30036	0.837826	0.120253	1.85101	0.110698	0.350788	-4.64531
734	ng2	-0.83765	1.62528	-2.5248	0.0426909	0.259737	-3.98625
735	SdhCL	-0.837104	2.37323	-2.75669	0.0309778	0.240347	-3.80439
736	CG44261	0.836925	0.567906	1.73388	0.130672	0.376106	-4.87066
737	Ldsdh1	-0.836501	3.28022	-4.53285	0.00339688	0.139036	-1.65341
738	Pcp	0.836062	8.44123	3.60336	0.0101864	0.186408	-2.97948
739	Acyp	-0.835746	1.00192	-2.94012	0.0241419	0.224455	-3.31463
740	CG34169	-0.835482	0.585393	-2.6416	0.0362972	0.251414	-3.65676
741	aly	0.834845	2.2209	3.45362	0.0123079	0.195036	-2.82287
742	CG42402	-0.83484	2.21554	-3.56641	0.0106699	0.188921	-2.6755
743	CR42875	0.834377	0.0496052	2.00361	0.0891201	0.322864	-4.43473
744	CG31294	-0.8339	3.07398	-2.50625	0.0438105	0.260683	-4.3034
745	CG31820	-0.833831	4.94267	-2.67384	0.0347162	0.248262	-4.36972
746	CG34021	-0.833656	2.09546	-2.31205	0.0575464	0.281934	-4.37436
747	CG18368	-0.832928	2.71802	-3.21686	0.016713	0.205579	-3.23439
748	CARPA	-0.83257	1.76299	-3.29378	0.015118	0.199541	-2.95943
749	Jon44E	0.83227	6.93702	3.36616	0.0137672	0.195852	-3.39096
750	CG14687	-0.832252	6.12156	-1.28155	0.244597	0.50127	-6.31667
751	CG14566	0.831813	4.98814	3.25208	0.0159612	0.202043	-3.5505
752	AOX2	0.83176	3.1275	4.15354	0.00523455	0.15649	-2.08505
753	CG14196	0.831358	2.16156	2.86435	0.0267475	0.231382	-3.61169
754	Hsp22	-0.830599	3.85264	-3.45214	0.012331	0.195036	-3.13081
755	mt:ND6	-0.829135	1.57945	-1.43776	0.197676	0.454872	-5.43794
756	CCY	-0.828118	1.68653	-3.0103	0.0219705	0.217625	-3.32778
757	CG17760	-0.827294	2.80369	-2.49391	0.0445724	0.261659	-4.26406
758	CG5404	-0.826227	3.1877	-3.94116	0.00673159	0.170181	-2.36528
759	CG42346	-0.826024	3.26646	-3.4117	0.0129851	0.195852	-3.07651
760	CG11158	0.825872	2.14263	3.60327	0.0101876	0.186408	-2.61402
761	Sgs3	0.825793	13.5852	2.50596	0.0438281	0.260683	-4.16894
762	CG33233	-0.824772	2.41036	-2.76044	0.0308192	0.240347	-3.80666
763	CG15765	-0.824603	3.93394	-5.54721	0.00118044	0.100254	-0.621907
764	CG44624	0.824599	3.3557	4.01757	0.0061443	0.167997	-2.29631
765	dec	-0.824396	0.104953	-2.38407	0.0519937	0.273153	-3.93688
766	Adk2	0.824177	6.34102	6.98515	0.000326233	0.0619635	0.645682
767	CG15071	-0.823656	-0.410906	-1.56559	0.165541	0.418764	-4.92368
768	CG33965	0.823363	1.42148	3.04086	0.0210913	0.215069	-3.24175
769	CG32241	0.82262	2.83845	2.85025	0.0272647	0.233448	-3.76493
770	CG34161	-0.822059	1.73656	-2.05601	0.0827226	0.316679	-4.65921
771	Srxn	0.821914	7.67263	4.74223	0.00269974	0.132997	-1.58886
772	Kr	-0.820749	4.9632	-4.92335	0.00222433	0.127327	-1.42001
773	NimC1	-0.820446	5.19698	-5.81278	0.000914915	0.0905182	-0.466249
774	Cyp9h1	0.820212	3.84128	3.9804	0.00642262	0.169635	-2.42864
775	CG32204	-0.819384	1.52182	-3.40847	0.0130391	0.195852	-2.77134
776	CG9812	-0.819348	8.76263	-1.87812	0.106518	0.346976	-5.3891
777	CG31817	-0.819086	3.83969	-3.23712	0.0162759	0.204163	-3.42368
778	AcCoAS	0.81888	6.66228	4.98103	0.00209323	0.127327	-1.36558
779	Gcat	0.818054	0.46838	2.24824	0.0629771	0.289862	-4.17102
780	comr	0.817925	1.00498	2.56444	0.0403973	0.256702	-3.82403
781	CG32237	-0.817669	-0.349008	-2.09477	0.0782901	0.310406	-4.25984
782	CG3699	0.81663	3.22557	4.03846	0.00599377	0.16764	-2.24672
783	CG34332	0.816325	-0.201307	2.26603	0.0614124	0.288488	-4.05271
784	CG43968	-0.816053	1.9066	-2.02712	0.086191	0.319861	-4.73334
785	CG14006	-0.815773	2.57185	-3.17933	0.0175568	0.206446	-3.25769
786	CG42299	0.815425	0.968429	2.12302	0.0752109	0.306351	-4.42279
787	CG33225	-0.814917	2.96462	-2.92049	0.0247899	0.224455	-3.69424
788	CG12481	-0.813724	2.31055	-3.09524	0.0196193	0.211438	-3.32323
789	CG7800	-0.813462	4.23213	-4.52583	0.00342351	0.139639	-1.81262
790	FASN1	0.813404	7.22937	2.70165	0.0334105	0.246838	-4.31197
791	CG42690	-0.811989	0.351461	-1.45377	0.193356	0.450269	-5.18311
792	Gapdh1	0.811982	9.41182	3.38633	0.0134148	0.195852	-3.20909
793	CG33667	-0.811626	3.47262	-3.38001	0.013524	0.195852	-3.15968
794	Unc-115b	0.811457	3.56856	1.54349	0.170725	0.425167	-5.73963
795	CG5577	0.811422	5.14914	5.20305	0.00166382	0.117035	-1.1137
796	Eo	0.810834	4.17223	5.00811	0.00203472	0.125755	-1.23925
797	CG33060	-0.810373	1.51366	-2.13254	0.0742007	0.305623	-4.51047
798	mt:ATPase6	-0.809927	9.28163	-1.50564	0.179957	0.435687	-5.84604
799	nsr	0.809619	3.61569	5.11175	0.00182711	0.120077	-1.04309
800	UQCR-6.4L	-0.80947	0.440916	-2.06921	0.0811851	0.314954	-4.40895
801	GlcAT-P	-0.809292	5.88686	-6.29524	0.000588069	0.0812712	-0.00143778
802	yellow-c	-0.809219	8.65729	-1.79883	0.119199	0.361597	-5.50535
803	CG45087	-0.808715	8.28143	-3.13126	0.0187054	0.20868	-3.63736
804	Pepck1	-0.808715	8.28143	-3.13126	0.0187054	0.20868	-3.63736
805	Alp7	-0.808513	7.00022	-3.03342	0.0213019	0.215858	-3.85284
806	CG13012	-0.808381	3.85973	-1.87442	0.107079	0.347282	-5.35922
807	Pos	-0.808347	2.54088	-3.012	0.0219205	0.217625	-3.48203
808	Cyp4ad1	0.808164	4.58805	3.89955	0.00707734	0.171382	-2.63977
809	tbrd-3	0.807063	1.43874	2.95269	0.0237366	0.222889	-3.3639
810	CG18477	-0.80684	3.75269	-3.69784	0.00905615	0.179836	-2.78467
811	CG31780	-0.80684	3.75269	-3.69784	0.00905615	0.179836	-2.78467
812	CG13045	0.806771	0.149648	2.27414	0.0607122	0.287343	-4.08949
813	CG7362	-0.805912	2.5146	-3.15579	0.0181095	0.207937	-3.27906
814	CG14853	-0.805431	1.97769	-3.68169	0.00923916	0.179836	-2.48827
815	CG3106	0.8054	2.33948	1.74167	0.12924	0.374945	-5.20978
816	CG10300	0.804505	3.76279	5.49834	0.00123827	0.10172	-0.647786
817	Mst33A	-0.804251	5.12592	-3.53129	0.0111528	0.19179	-3.17967
818	AANATL6	0.803818	3.67875	1.40682	0.206268	0.463006	-5.93405
819	klhl10	-0.803286	4.62069	-4.20318	0.00494055	0.154045	-2.25747
820	CG33490	-0.802821	3.05146	-2.61253	0.0377877	0.253484	-4.14797
821	Rpt4R	0.802724	3.84257	4.24651	0.00469884	0.152958	-2.09372
822	CG31213	-0.802518	3.77291	-4.10714	0.00552702	0.159916	-2.25934
823	LManV	-0.802	3.99688	-1.41954	0.202696	0.459685	-5.98331
824	CG44403	-0.801427	2.2418	-3.24835	0.0160391	0.202811	-3.10269
825	Andorra	-0.801047	0.267918	-2.47324	0.0458795	0.263423	-3.83963
826	CG7201	0.800957	1.72936	2.77712	0.0301233	0.239094	-3.65383
827	Rim	-0.800335	4.31208	-6.06704	0.000722452	0.0870272	-0.139767
828	CG13833	0.800268	1.08265	1.98361	0.0916899	0.327082	-4.63238
829	CG42322	-0.800131	3.6306	-2.1839	0.0689865	0.298524	-4.88043
830	CG13101	0.799192	2.71473	3.68508	0.00920037	0.179836	-2.60753
831	DIP-alpha	-0.798641	1.75468	-2.64766	0.0359944	0.250341	-3.83954
832	CG33226	-0.798441	-0.0628314	-1.20252	0.271876	0.5259	-5.39648
833	Inx6	0.797669	0.72333	2.45471	0.0470855	0.264995	-3.93001
834	nwk	-0.796939	3.36076	-4.92582	0.00221851	0.127327	-1.21321
835	CG31327	-0.796921	4.48302	-4.73837	0.00271105	0.132997	-1.59155
836	JYalpha	-0.796699	3.32335	-2.26101	0.0618495	0.288902	-4.70686
837	CG42779	-0.796645	2.89334	-2.68644	0.034118	0.248262	-4.01017
838	janB	-0.796563	3.8621	-3.14658	0.0183307	0.208279	-3.55406
839	CG33286	-0.79528	3.80695	-4.41205	0.00388943	0.146258	-1.88741
840	Cc2d2a	0.795024	2.31127	3.30677	0.0148654	0.19821	-3.03507
841	CG15522	-0.794793	0.371935	-2.39304	0.0513417	0.272162	-3.96227
842	CG9673	0.794777	5.68081	5.01073	0.00202914	0.125755	-1.35021
843	CG4847	0.792744	3.99508	4.12736	0.00539741	0.158509	-2.2672
844	Adhr	0.79263	0.658185	2.36661	0.0532872	0.275636	-4.03993
845	CG34393	-0.79118	-0.298207	-1.95529	0.0954566	0.330565	-4.44905
846	Best3	0.790937	2.50057	3.74659	0.00852744	0.177925	-2.49006
847	CG34292	-0.790926	1.94434	-2.10514	0.0771453	0.309025	-4.63348
848	CR31958	-0.790908	-0.218004	-2.07465	0.0805605	0.313245	-4.3042
849	ymp	-0.79072	4.5202	-3.44564	0.0124338	0.195528	-3.24061
850	kug	-0.790309	7.28864	-3.73529	0.0086469	0.178829	-2.87092
851	Taldo	0.790228	6.99908	4.89688	0.00228755	0.128288	-1.44546
852	Acam	-0.789703	3.56488	-4.01518	0.00616184	0.167997	-2.34029
853	Nmdar2	-0.789263	2.42586	-3.2634	0.0157273	0.201593	-3.11617
854	Tpi	0.788583	7.73893	3.40478	0.0131008	0.195852	-3.28962
855	RhoGAP100F	-0.788502	4.79111	-4.42216	0.00384532	0.145244	-2.00236
856	CG8046	-0.788453	2.47362	-3.56751	0.0106552	0.188921	-2.71955
857	Oamb	-0.788236	0.995217	-2.67323	0.0347453	0.248262	-3.67521
858	Slc45-1	0.78789	6.03464	4.12225	0.00542985	0.158726	-2.42328
859	CG15282	0.787715	7.48914	6.21021	0.000634518	0.0832264	-0.0276179
860	qin	0.787713	1.96739	3.49913	0.0116159	0.192457	-2.72139
861	CG32061	-0.787089	2.1386	-3.11273	0.0191696	0.209843	-3.26814
862	CG17108	0.78693	6.08069	1.85671	0.109806	0.349944	-5.57378
863	CG33309	-0.785743	3.38255	-2.9937	0.0224645	0.218815	-3.67719
864	CG13110	-0.783833	2.58222	-3.66574	0.0094239	0.180619	-2.61071
865	CG13215	-0.783751	1.95355	-1.18902	0.276786	0.530668	-5.80698
866	TTLL6A	-0.783514	3.63049	-4.4667	0.00365736	0.142261	-1.79273
867	CG4375	-0.783354	4.38928	-3.75747	0.00841415	0.176918	-2.80516
868	TwdlG	0.782443	0.224875	2.39855	0.0509458	0.271027	-3.93333
869	NimB2	0.782119	6.13198	3.51763	0.011347	0.192326	-3.2187
870	CG4335	0.781986	-0.331855	1.35128	0.222545	0.478476	-5.18703
871	SLO2	-0.781887	2.26947	-3.69066	0.00913698	0.179836	-2.52423
872	CG14930	0.781421	1.90675	2.08426	0.0794677	0.311868	-4.65334
873	CG42560	-0.781007	1.83032	-2.67148	0.034829	0.248262	-3.82053
874	Teh1	-0.780693	0.105621	-1.86528	0.108478	0.348469	-4.62603
875	grass	0.780642	5.51408	5.11185	0.00182692	0.120077	-1.23227
876	CAH6	-0.778328	0.0775513	-1.99575	0.0901217	0.324344	-4.45079
877	spz3	-0.778027	3.55034	-1.66172	0.144667	0.391871	-5.58589
878	CG5614	-0.778005	4.83928	-3.13001	0.0187363	0.20868	-3.71213
879	Gbs-70E	-0.77737	5.89425	-3.24023	0.0162099	0.204084	-3.60497
880	Mal-A8	0.777311	5.81714	4.26765	0.00458571	0.152958	-2.24054
881	CG4467	-0.776556	3.87366	-3.59156	0.0103382	0.187412	-2.94782
882	28SrRNA-Psi:CR40596	0.775967	6.41793	2.01525	0.087657	0.32071	-5.34306
883	CG31391	-0.77571	3.46959	-3.28482	0.015295	0.199634	-3.29008
884	CG11852	0.775524	4.08309	4.16516	0.00516401	0.15649	-2.23335
885	twy	0.774897	2.71215	3.44972	0.0123693	0.195036	-2.9179
886	CG8117	0.774592	-0.0911955	2.10489	0.0771726	0.309025	-4.28128
887	CG16959	0.774588	3.82509	3.53212	0.0111411	0.19179	-3.01659
888	dj	-0.774576	5.44673	-3.00241	0.0222037	0.218265	-3.93196
889	CR7448	-0.774358	0.0682238	-2.06626	0.0815266	0.315758	-4.35618
890	CG43740	0.774325	1.5433	3.03323	0.0213071	0.215858	-3.27222
891	CG5968	-0.773579	3.60163	-2.8076	0.0288947	0.237423	-3.98404
892	VAChT	-0.773333	3.62826	-3.99088	0.00634275	0.169635	-2.38279
893	CG12448	-0.772843	3.18817	-2.5577	0.0407784	0.256702	-4.25545
894	CG8369	0.772742	6.6445	5.35565	0.00142627	0.1074	-0.948705
895	CG34287	-0.77272	1.3061	-1.99977	0.0896076	0.323684	-4.65347
896	beat-VII	-0.772558	2.15893	-2.83323	0.0279029	0.234101	-3.65708
897	CG32371	-0.772411	4.80356	-3.51054	0.0114492	0.19241	-3.18295
898	CG32532	-0.772324	0.375508	-2.46688	0.0462896	0.264018	-3.86337
899	Eaat2	-0.77231	3.62253	-4.96003	0.00213992	0.127327	-1.2167
900	Odc2	0.772132	1.3858	2.7126	0.0329107	0.245127	-3.68362
901	CG31176	-0.77203	3.83595	-3.08307	0.0199388	0.212172	-3.63876
902	LysD	0.771863	8.82798	3.28971	0.0151981	0.199634	-3.38259
903	CG7634	-0.771526	3.60214	-3.34036	0.014233	0.196469	-3.23953
904	Sodh-1	0.771241	3.82262	4.31401	0.00434808	0.150669	-2.00785
905	CG43089	-0.770179	1.7912	-2.62547	0.0371167	0.25276	-3.87753
906	beat-IIIb	-0.770024	0.457489	-2.48989	0.0448233	0.261659	-3.84397
907	CG15909	-0.769149	1.6891	-2.61458	0.0376806	0.253484	-3.8739
908	Obp83g	0.769108	1.85912	2.55272	0.0410621	0.256702	-3.99025
909	CG42337	-0.768938	2.07138	-3.24335	0.016144	0.203811	-3.07963
910	Mst84Dd	-0.768912	4.34447	-3.81143	0.00787616	0.176043	-2.72832
911	Lcp1	0.768813	12.8839	3.01343	0.0218785	0.217625	-3.49933
912	Agpat4	0.768785	2.22979	2.52543	0.0426535	0.259737	-4.10032
913	Had1	0.768295	7.04686	3.91377	0.00695707	0.171382	-2.65064
914	CG17826	-0.768138	8.03228	-2.43935	0.0481099	0.266481	-4.63895
915	CG2577	-0.767556	1.16654	-2.19463	0.0679452	0.297616	-4.36149
916	CG4669	-0.766617	5.26377	-5.30236	0.00150458	0.110304	-1.01269
917	CG14892	0.766233	0.272958	1.55176	0.168768	0.422081	-5.05025
918	CG13872	-0.765928	2.70156	-2.93902	0.0241779	0.224455	-3.61596
919	eys	-0.765006	2.67971	-3.69931	0.00903968	0.179836	-2.58489
920	CG15818	-0.764572	7.00176	-2.34569	0.0548805	0.27776	-4.83945
921	stil	0.764379	2.11087	3.31516	0.0147046	0.197412	-2.98886
922	CG2861	0.764325	4.98319	5.7272	0.000992301	0.0924289	-0.541415
923	CG13041	0.764215	3.70989	3.6169	0.0100153	0.185625	-2.88288
924	Sox21a	-0.763897	2.20283	-2.65687	0.0355389	0.24928	-3.9121
925	CG40498	-0.763731	2.87142	-2.25588	0.0623004	0.289095	-4.6177
926	CG32982	-0.763468	5.26652	-3.15329	0.0181693	0.207997	-3.71095
927	RSG7	-0.763375	2.66973	-3.9851	0.0063867	0.169635	-2.21824
928	CG17065	0.763373	4.74196	3.38761	0.0133927	0.195852	-3.34284
929	Sgs4	0.763118	11.4858	2.73677	0.0318358	0.243632	-3.97319
930	CG46435	-0.761249	0.624655	-2.15412	0.0719633	0.302123	-4.32451
931	CG42393	-0.760896	5.08983	-2.66121	0.0353264	0.24928	-4.4011
932	Pgd	0.76081	6.3266	3.78474	0.00813736	0.176918	-2.85578
933	CG42523	-0.760784	4.18648	-3.4237	0.0127873	0.195852	-3.22546
934	inaC	-0.760454	0.233913	-2.35296	0.054321	0.276908	-3.99688
935	ouib	-0.760222	0.0194141	-2.08149	0.0797811	0.312396	-4.329
936	Uch-L5R	-0.759569	1.77776	-2.94571	0.0239609	0.223858	-3.43246
937	CG34457	-0.758733	3.28061	-3.27354	0.0155211	0.200386	-3.26896
938	dpr12	-0.758624	3.67868	-4.58548	0.00320441	0.136385	-1.65928
939	CG15803	-0.758361	1.36782	-2.52924	0.0424275	0.259041	-3.93506
940	CG30383	0.758336	0.584701	2.27307	0.0608037	0.287433	-4.156
941	CG33136	-0.758265	2.75771	-3.37702	0.0135762	0.195852	-3.02599
942	CG33017	-0.758241	3.68997	-3.95615	0.00661169	0.169635	-2.43833
943	Rab3-GEF	-0.758157	2.85772	-3.4539	0.0123035	0.195036	-2.94197
944	brv2	0.758021	0.998069	2.37434	0.0527103	0.274823	-4.08445
945	CG18404	-0.757282	0.405665	-1.42814	0.20031	0.457079	-5.22376
946	CG10962	0.75666	5.46028	5.58039	0.00114292	0.0979991	-0.718951
947	Apoltp	-0.756483	5.04598	-4.38549	0.00400814	0.148062	-2.06791
948	CG32191	0.756189	4.71767	5.09427	0.00186039	0.120077	-1.20502
949	MtnB	0.754995	2.49167	2.14757	0.0726351	0.303779	-4.68687
950	Pk34A	0.754946	2.54579	3.78752	0.00810975	0.176918	-2.44592
951	Cad88C	-0.754758	1.21869	-2.86052	0.0268867	0.231627	-3.45567
952	CG31075	0.754268	10.1388	4.39189	0.00397918	0.147922	-1.86153
953	CG43349	0.754116	6.15618	4.89447	0.0022934	0.128288	-1.48316
954	CG15890	-0.754095	3.77275	-4.81311	0.0025013	0.132355	-1.4081
955	Muc68Ca	-0.753913	7.59286	-3.95588	0.00661383	0.169635	-2.56331
956	5.8SrRNA-Psi:CR45854	0.753901	8.17874	4.57023	0.0032589	0.137212	-1.76581
957	CG32971	0.75355	2.6086	2.70941	0.0330555	0.245863	-3.91775
958	betaTry	0.753139	9.06355	2.4318	0.0486219	0.266898	-4.58229
959	CG46434	-0.752843	5.23221	-3.08769	0.0198168	0.212172	-3.80145
960	CG13526	-0.752226	0.696289	-1.84074	0.112323	0.352622	-4.75578
961	CG15255	0.751429	2.90988	1.73861	0.129801	0.375154	-5.34098
962	CG18063	-0.751036	3.23052	-2.55093	0.0411642	0.256702	-4.27451
963	nAChRalpha1	-0.75077	3.39433	-4.4882	0.00357033	0.142261	-1.72773
964	RpS19b	0.750525	3.40602	3.23124	0.0164016	0.204532	-3.34956
965	tei	-0.749561	3.3458	-4.34232	0.00420977	0.14828	-1.89521
966	CG15312	-0.74951	1.80219	-3.29998	0.0149968	0.198835	-2.95858
967	Cipc	-0.749322	4.51262	-3.79495	0.00803634	0.176897	-2.77177
968	CG2145	0.749283	6.2557	4.23326	0.00477132	0.152958	-2.27933
969	CG16700	-0.749108	5.96662	-5.1557	0.00174635	0.120077	-1.18943
970	sif	-0.749039	3.98277	-4.68444	0.00287465	0.132997	-1.58982
971	CG6980	-0.748716	3.10154	-3.57554	0.0105481	0.1886	-2.82657
972	CG34298	-0.748702	0.819154	-1.62229	0.152909	0.403039	-5.06024
973	CG9254	-0.748684	5.06713	-4.31792	0.00432868	0.150441	-2.15314
974	CG32299	-0.74868	2.97137	-3.08634	0.0198523	0.212172	-3.4656
975	dpr5	-0.747826	-0.133242	-2.17658	0.0697066	0.299176	-4.18162
976	CG43935	-0.74759	2.40539	-2.55738	0.0407963	0.256702	-4.09271
977	CG5334	0.746037	0.98554	2.57937	0.0395674	0.255525	-3.80131
978	Ugt303B2	0.745811	1.18937	2.59622	0.0386527	0.254177	-3.81123
979	CG43702	-0.74577	1.32622	-2.4807	0.0454029	0.26233	-3.99513
980	CG45490	0.744089	1.93556	2.54854	0.0413013	0.256702	-4.01102
981	CG13618	-0.743925	1.6932	-2.86431	0.0267487	0.231382	-3.5295
982	CG44163	-0.74363	1.07526	-1.75026	0.127682	0.373053	-4.94341
983	Mics1	-0.743304	3.2703	-2.87703	0.0262911	0.229793	-3.8195
984	CG15625	-0.743184	2.24814	-2.66394	0.0351935	0.249208	-3.91128
985	CG12426	-0.742728	0.390722	-2.30976	0.0577331	0.28258	-4.07788
986	Cep89	0.742051	0.964689	2.62783	0.0369955	0.25276	-3.73182
987	CG8910	-0.742002	0.970462	-2.39869	0.0509362	0.271027	-4.04767
988	CR45772	-0.740804	1.84	-2.31362	0.057419	0.281934	-4.32304
989	28SrRNA-Psi:CR45859	0.740669	8.65309	1.46124	0.191371	0.448194	-5.9488
990	CG14630	0.74032	3.15506	3.62118	0.0099619	0.185625	-2.77442
991	CG13843	-0.739944	2.44361	-3.07715	0.0200963	0.212485	-3.37427
992	Muc14A	-0.739942	0.00528367	-1.89535	0.103944	0.343972	-4.5718
993	CG32017	-0.73991	4.38066	-2.66871	0.0349626	0.248651	-4.31643
994	fipi	-0.739833	3.05335	-3.19927	0.0171028	0.206058	-3.32627
995	fne	-0.739748	6.50959	-3.55478	0.0108272	0.190115	-3.15875
996	fid	-0.739747	1.92071	-2.93999	0.0241461	0.224455	-3.46592
997	Srr	0.739682	4.08121	3.49945	0.0116113	0.192457	-3.10395
998	CadN	-0.7393	6.42895	-5.10287	0.00184392	0.120077	-1.23944
999	Pglym78	0.738727	6.93909	2.91742	0.0248926	0.224455	-4.02097
1000	CG46244	-0.738111	1.17911	-2.63454	0.0366536	0.252533	-3.75814
1001	CG13563	0.737562	0.189499	2.24027	0.0636918	0.290446	-4.14119
1002	CG32212	0.73685	4.50743	4.93661	0.00219338	0.127327	-1.36341
1003	CG43707	-0.736411	2.53617	-3.17527	0.0176507	0.206475	-3.25764
1004	sa	0.736193	2.46894	3.12728	0.0188041	0.20868	-3.30886
1005	CG15219	-0.735508	5.27131	-2.77824	0.0300772	0.239094	-4.24466
1006	Obp56a	0.735108	4.66946	2.54463	0.041527	0.257288	-4.52918
1007	Naa20B	-0.735021	1.06127	-2.27976	0.0602318	0.286571	-4.22641
1008	chp	-0.73473	2.56671	-3.48103	0.0118859	0.19285	-2.85137
1009	CG7296	0.734686	6.73858	1.81348	0.116749	0.358363	-5.60806
1010	CG14316	-0.734038	3.12747	-2.75543	0.0310313	0.240347	-3.96221
1011	psh	0.733117	3.86268	2.92501	0.0246391	0.224455	-3.86447
1012	Sgs7	0.732517	12.591	3.32568	0.0145058	0.197185	-3.08856
1013	CG46312	-0.732373	5.06531	-5.42422	0.00133219	0.104481	-0.869831
1014	CG34377	-0.732217	5.0765	-5.47977	0.00126108	0.102164	-0.810769
1015	CG8539	-0.732062	0.933723	-2.38948	0.0515996	0.272545	-4.05431
1016	CG31206	-0.732027	3.58716	-2.5959	0.0386698	0.254177	-4.28441
1017	CG42540	-0.731647	2.13688	-3.13627	0.018582	0.20868	-3.23653
1018	cpx	-0.73144	5.56502	-4.34102	0.004216	0.14828	-2.14729
1019	CG13891	-0.731163	1.43764	-2.90318	0.0253764	0.226173	-3.43311
1020	loaf	-0.730812	4.84215	-3.82189	0.00777637	0.17601	-2.77071
1021	GstE5	0.730223	1.61831	2.59411	0.0387659	0.254177	-3.88859
1022	Tengl4	-0.729332	2.42108	-2.57506	0.0398056	0.255818	-4.07123
1023	CG32681	-0.729202	1.67911	-2.82886	0.0280695	0.234641	-3.57598
1024	CG15475	-0.729065	3.09779	-3.07009	0.0202859	0.212797	-3.51406
1025	CG9444	0.729035	6.44559	4.724	0.00275358	0.132997	-1.67509
1026	Octbeta3R	-0.728522	0.769521	-2.19328	0.0680753	0.297737	-4.29541
1027	CG43058	-0.728003	1.23406	-2.79236	0.0295024	0.238699	-3.55112
1028	Drl-2	-0.727172	2.60258	-3.60993	0.010103	0.185783	-2.68802
1029	COX7CL	-0.727171	2.60849	-2.12164	0.0753582	0.306621	-4.75058
1030	kat80	-0.727114	5.32601	-5.6339	0.00108521	0.0965755	-0.659517
1031	mtrm	0.726814	-0.157562	1.59244	0.159441	0.410646	-4.9301
1032	Agpat1	-0.726545	3.74987	-4.25049	0.00467729	0.152958	-2.07812
1033	CG13693	-0.726489	2.77571	-2.2676	0.0612765	0.2882	-4.58097
1034	CG34210	-0.725173	1.14535	-2.51286	0.043408	0.259895	-3.91997
1035	CG9582	-0.725149	1.5106	-2.75715	0.0309582	0.240347	-3.64548
1036	CG1137	-0.725145	3.88291	-3.912	0.00697193	0.171382	-2.52877
1037	Mur29B	-0.725033	8.54876	-2.5878	0.0391072	0.254409	-4.39452
1038	qjt	0.724953	1.73973	2.69503	0.0337165	0.248262	-3.77055
1039	Myc	-0.7247	6.60748	-4.50849	0.00349031	0.140736	-1.92778
1040	CG2528	-0.72434	3.89369	-3.0483	0.0208829	0.21448	-3.6992
1041	Takl1	0.72413	4.24669	5.01473	0.00202069	0.125755	-1.24348
1042	CG12539	0.724111	5.44953	2.95392	0.0236976	0.222889	-4.00001
1043	CG14570	-0.723783	0.685796	-2.27012	0.0610582	0.288112	-4.17726
1044	28SrRNA-Psi:CR45855	0.723617	5.35527	2.36679	0.0532737	0.275636	-4.84016
1045	Nlg2	-0.723389	3.2024	-4.26352	0.00460759	0.152958	-1.96675
1046	CG14731	-0.723122	1.17602	-2.68846	0.034023	0.248262	-3.68382
1047	sut4	-0.723097	4.60239	-4.35233	0.004162	0.14828	-2.07131
1048	NimB3	0.72291	4.68423	5.04845	0.0019509	0.123877	-1.25428
1049	CG10353	-0.722481	6.5736	-5.46167	0.00128377	0.103291	-0.838871
1050	Dscam2	-0.722442	5.48629	-4.78782	0.00257015	0.132997	-1.60609
1051	soti	-0.721893	4.87296	-3.43472	0.0126084	0.195852	-3.2935
1052	CG42814	-0.7217	0.122254	-1.82448	0.114943	0.356505	-4.68203
1053	cac	-0.721382	3.76033	-4.60718	0.00312864	0.135881	-1.64763
1054	dar1	-0.720795	4.14128	-2.97522	0.0230285	0.220459	-3.84355
1055	hll	-0.720763	5.60722	-2.35466	0.0541915	0.276856	-4.86817
1056	CG11317	-0.720496	2.21846	-2.92738	0.0245602	0.224455	-3.53838
1057	CG9822	-0.719947	5.69997	-1.38972	0.211161	0.467755	-6.18953
1058	CG42355	-0.719846	2.84234	-2.30522	0.0581044	0.283786	-4.54217
1059	CG43183	-0.719799	1.25833	-1.57391	0.163627	0.416284	-5.20561
1060	Lsp1beta	0.719526	13.3183	2.29314	0.0591039	0.285365	-4.48667
1061	CG12923	-0.719184	2.52235	-3.49978	0.0116065	0.192457	-2.8186
1062	CG31642	0.718808	3.99257	4.0149	0.00616385	0.167997	-2.41158
1063	CG14356	0.718585	2.13758	2.75823	0.0309127	0.240347	-3.75668
1064	CG9641	0.71817	5.4636	4.53387	0.00339304	0.139036	-1.9068
1065	rad	-0.717906	3.0588	-3.7041	0.00898631	0.179836	-2.64965
1066	nAChRalpha2	-0.717599	2.14788	-3.46081	0.0121957	0.19465	-2.80394
1067	Hex-A	-0.717108	6.7258	-3.75146	0.00847651	0.177518	-2.88399
1068	Ddc	0.717023	8.55991	2.76176	0.0307637	0.240347	-4.14382
1069	CG9970	-0.717	3.79021	-2.90697	0.0252468	0.225532	-3.88009
1070	Idgf1	-0.716662	5.17668	-5.50224	0.00123354	0.10172	-0.792494
1071	CG10508	-0.716541	3.21061	-4.13569	0.005345	0.157758	-2.12629
1072	nrv3	-0.716507	5.30746	-3.94003	0.00674074	0.170181	-2.64802
1073	CG32603	0.716062	2.83333	2.12121	0.0754047	0.306621	-4.79833
1074	unc-104	-0.715999	6.00753	-5.87476	0.000863141	0.0905182	-0.420112
1075	CG32373	-0.715966	3.1655	-3.23258	0.0163727	0.204532	-3.30321
1076	CG31773	-0.715957	4.13607	-3.65388	0.00956393	0.182087	-2.90817
1077	CG43896	-0.715792	8.09315	-3.19132	0.0172822	0.206106	-3.56445
1078	KaiR1D	-0.715736	3.29754	-3.66198	0.00946805	0.180619	-2.75015
1079	fat-spondin	-0.71558	6.2575	-4.57118	0.00325547	0.137212	-1.86495
1080	Vsx2	-0.715098	0.874633	-2.45678	0.0469492	0.264839	-3.95269
1081	CG6788	-0.713617	2.52731	-1.73994	0.129557	0.375087	-5.25679
1082	CG45075	-0.713542	1.24802	-1.65402	0.146241	0.393706	-5.1016
1083	CG6380	-0.713335	3.93778	-3.18086	0.0175214	0.206443	-3.52162
1084	CG14759	-0.71316	0.283486	-1.71915	0.133418	0.378931	-4.84363
1085	Cyp6a21	0.712283	3.53678	2.8351	0.0278322	0.234101	-3.93091
1086	CG30391	-0.711747	1.71214	-2.94695	0.0239208	0.223724	-3.41992
1087	CG31407	-0.710601	3.36501	-3.57553	0.0105482	0.1886	-2.87788
1088	scu	0.710579	7.53337	3.39449	0.0132749	0.195852	-3.31615
1089	wry	-0.710434	3.51852	-4.69008	0.00285704	0.132997	-1.51092
1090	l(3)80Fj	-0.710096	7.67304	-2.6309	0.0368386	0.25276	-4.38467
1091	CG17199	-0.709865	2.40415	-2.78418	0.0298339	0.239094	-3.7739
1092	CG17781	-0.709469	0.493749	-2.15764	0.071604	0.302123	-4.29926
1093	sbm	-0.709407	6.45819	-5.10565	0.00183864	0.120077	-1.23569
1094	Spn55B	0.709068	5.78318	4.13306	0.00536148	0.157848	-2.41124
1095	CG13725	-0.708308	2.30625	-2.50962	0.0436049	0.260237	-4.14056
1096	FASN3	-0.708018	7.63526	-3.61665	0.0100184	0.185625	-3.00783
1097	Fpgs	0.708008	2.98954	4.01941	0.00613089	0.167997	-2.23059
1098	CG17841	0.707674	5.14716	3.93492	0.00678228	0.170181	-2.64421
1099	CG14932	0.707318	2.01002	3.03074	0.0213782	0.215858	-3.35656
1100	CG32809	-0.706582	4.56727	-4.686	0.00286977	0.132997	-1.66434
[truncated: 10,647 more rows]

## Sheet: DEGsHeatmap
	geneID	A2	A5	P3	P4
[truncated: 42 more rows]
